# Supplementary material for: GPR124 regulates hyaloid blood vessel regression and is associated with endothelial-mesenchymal transition
Source: Sci Rep. 2026 Apr 29;16:13765. doi: 10.1038/s41598-026-50835-1 (PMC13128929; doi:10.1038/s41598-026-50835-1)
Supplement: Supplementary file 2 — Supplementary Information 2. [file 41598_2026_50835_MOESM2_ESM.xlsx]

## Sheet: Cluster markers
Table S1: Marker genes identified in endothelial and pericyte clusters. Fold change in RNA expression (log-normalized UMI counts) compared to the other cluster. Inclusion criteria: Log2 fold change > 1 and p < 0.05. UMI, unique molecular identifier.
Cluster	Gene	p-value	Log2 fold change
Endothelial cells	Cldn5	2.15125e-10	8.92263
Endothelial cells	Cdh5	2.15125e-10	8.42586
Endothelial cells	Slc2a1	2.51128e-08	7.48265
Endothelial cells	Col18a1	3.35271e-08	7.00444
Endothelial cells	Ramp2	7.43893e-08	5.37815
Endothelial cells	Mfng	2.12028e-07	6.31877
Endothelial cells	Rasip1	2.12028e-07	6.82277
Endothelial cells	Cd34	2.12028e-07	7.1895
Endothelial cells	Egfl7	4.95686e-07	6.47153
Endothelial cells	Slc7a5	1.02669e-06	6.53866
Endothelial cells	Ctla2a	1.0692e-06	5.71116
Endothelial cells	Pecam1	2.08786e-06	6.89226
Endothelial cells	Adgrl4	2.08786e-06	6.73572
Endothelial cells	Kdr	2.08786e-06	7.24306
Endothelial cells	Ptprb	2.08786e-06	7.36754
Endothelial cells	Col15a1	2.08786e-06	8.025
Endothelial cells	Six3os1	3.13583e-06	4.72375
Endothelial cells	Pdgfb	4.85836e-06	3.39827
Endothelial cells	Tsc22d1	4.86904e-06	3.73249
Endothelial cells	Flt1	7.29357e-06	3.64491
Endothelial cells	Slc38a2	8.09494e-06	4.28665
Endothelial cells	Cd93	1.1973e-05	2.00928
Endothelial cells	Stab1	1.53201e-05	6.587
Endothelial cells	Slc39a8	1.53201e-05	6.2757
Endothelial cells	Efna1	1.53201e-05	6.35199
Endothelial cells	Abcb1a	1.53201e-05	6.53508
Endothelial cells	Spock2	1.53201e-05	7.59846
Endothelial cells	Prcp	1.53201e-05	7.0212
Endothelial cells	Mmrn2	1.53201e-05	7.24585
Endothelial cells	Eogt	2.39345e-05	5.05077
Endothelial cells	Adgrf5	2.96987e-05	3.8009
Endothelial cells	Ctnnb1	3.0436e-05	1.7667
Endothelial cells	Aqp1	3.18434e-05	5.84618
Endothelial cells	S100a16	4.68072e-05	4.02523
Endothelial cells	Emp1	4.91828e-05	4.40106
Endothelial cells	Tie1	7.59526e-05	2.37756
Endothelial cells	Kpna4	8.08175e-05	4.71763
Endothelial cells	Rpl5	8.78375e-05	1.12975
Endothelial cells	Cyyr1	9.15177e-05	6.02695
Endothelial cells	Kank3	9.15177e-05	5.87512
Endothelial cells	Ushbp1	9.15177e-05	5.83101
Endothelial cells	Hmcn1	9.15177e-05	5.96207
Endothelial cells	Podxl	9.15177e-05	6.48811
Endothelial cells	Robo4	9.15177e-05	6.71313
Endothelial cells	Lmo2	9.15177e-05	6.63315
Endothelial cells	Vwa1	9.15177e-05	6.32779
Endothelial cells	Slc39a10	9.15177e-05	5.94003
Endothelial cells	Gja1	9.15177e-05	7.66399
Endothelial cells	Tspan13	0.000107062	5.45716
Endothelial cells	Six3	0.000121917	3.72984
Endothelial cells	Slc3a2	0.000208054	2.88401
Endothelial cells	Rpl38	0.000245493	1.38424
Endothelial cells	Fscn1	0.000255315	4.26871
Endothelial cells	Rps15a	0.000276794	1.40733
Endothelial cells	Rpl30	0.000305344	1.42215
Endothelial cells	Msn	0.000454927	2.04528
Endothelial cells	Rgcc	0.000469364	5.86402
Endothelial cells	Vwf	0.000469364	6.76674
Endothelial cells	Igfbp3	0.000469364	6.80019
Endothelial cells	Clec14a	0.000469364	5.7565
Endothelial cells	Limch1	0.000469364	5.81163
Endothelial cells	Nos3	0.000469364	5.50785
Endothelial cells	Unc45b	0.000469364	5.35308
Endothelial cells	Fzd6	0.000469364	6.39831
Endothelial cells	Tdrp	0.000469364	5.66861
Endothelial cells	Palmd	0.000469364	5.62321
Endothelial cells	Bmf	0.000484985	4.55347
Endothelial cells	Lcp1	0.000498941	4.84405
Endothelial cells	Hspg2	0.000541277	3.82064
Endothelial cells	Eng	0.00056964	1.84066
Endothelial cells	Prnd	0.000618286	4.10199
Endothelial cells	Rps20	0.000638937	1.24312
Endothelial cells	Srgn	0.000729416	4.54667
Endothelial cells	Tspan18	0.000766801	3.40682
Endothelial cells	Dll4	0.000880126	3.90204
Endothelial cells	Relb	0.000946886	4.09721
Endothelial cells	Ly6e	0.000967253	4.18477
Endothelial cells	Nfib	0.00097144	3.26762
Endothelial cells	Prkch	0.0010895	3.87476
Endothelial cells	Rps24	0.00120825	1.16788
Endothelial cells	Tmem88	0.00121839	3.71529
Endothelial cells	Scarb1	0.00123572	3.73616
Endothelial cells	Ndufa4	0.00127266	3.7005
Endothelial cells	Plvap	0.00133003	5.57912
Endothelial cells	Id1	0.00162059	2.53065
Endothelial cells	Ecscr	0.00209848	2.89115
Endothelial cells	Cavin3	0.00212505	2.00049
Endothelial cells	Thsd1	0.00214507	4.9465
Endothelial cells	Grrp1	0.00214507	4.99128
Endothelial cells	Bcl6b	0.00214507	5.09202
Endothelial cells	Rtf2	0.00214507	5.0272
Endothelial cells	Icam2	0.00214507	5.2137
Endothelial cells	Pde2a	0.00214507	5.43588
Endothelial cells	Tmeff1	0.00214507	5.6333
Endothelial cells	Gimap1	0.00214507	4.95245
Endothelial cells	Adar	0.00214507	4.9338
Endothelial cells	Afap1l1	0.00214507	5.06725
Endothelial cells	Lmf2	0.00214507	5.07038
Endothelial cells	C130074G19Rik	0.00214507	5.1493
Endothelial cells	Sox7	0.00214507	6.65978
Endothelial cells	St3gal6	0.00214507	5.57192
Endothelial cells	Exoc3l	0.00214507	6.54203
Endothelial cells	Plk2	0.00214507	5.39641
Endothelial cells	Ldb2	0.00214507	5.57281
Endothelial cells	Sox18	0.00214507	5.71846
Endothelial cells	Trim30a	0.00214507	5.55209
Endothelial cells	Cd38	0.00214507	5.77888
Endothelial cells	Mfsd2a	0.00214507	5.79905
Endothelial cells	Yif1b	0.00214507	4.6739
Endothelial cells	A430106G13Rik	0.00214507	4.71857
Endothelial cells	Entpd1	0.00214507	5.89925
Endothelial cells	Flt4	0.00214507	6.47001
Endothelial cells	Slc43a3	0.00214507	4.8242
Endothelial cells	Cavin2	0.0022307	4.56635
Endothelial cells	Vim	0.00227666	1.25126
Endothelial cells	Gimap4	0.00227704	4.18722
Endothelial cells	Zmiz1	0.00238887	2.44296
Endothelial cells	Sat1	0.00258008	3.4986
Endothelial cells	Dok4	0.00297769	4.07362
Endothelial cells	Plpp3	0.00300026	3.03786
Endothelial cells	Adam15	0.00310121	3.63803
Endothelial cells	Pabpc4	0.00314486	3.46523
Endothelial cells	H2-D1	0.00316171	3.44262
Endothelial cells	Abhd2	0.00320831	2.36733
Endothelial cells	Grb2	0.00340222	4.57713
Endothelial cells	Hlx	0.00342799	3.97625
Endothelial cells	Slc6a6	0.00346588	2.88211
Endothelial cells	Srgap2	0.00389413	3.5491
Endothelial cells	Arhgef15	0.00391149	4.54858
Endothelial cells	Fmnl3	0.00424858	2.71593
Endothelial cells	Chst15	0.00441766	3.45749
Endothelial cells	Mpzl1	0.0044357	3.85957
Endothelial cells	Eef1g	0.00452371	1.74339
Endothelial cells	Ivns1abp	0.00460686	4.34208
Endothelial cells	Aplnr	0.00480776	4.12367
Endothelial cells	Rpl9	0.00503636	1.81294
Endothelial cells	Tgfb1	0.0050855	3.26232
Endothelial cells	Notch4	0.00520207	3.67875
Endothelial cells	Plxnd1	0.00524774	2.36736
Endothelial cells	Tvp23b	0.00563964	2.54692
Endothelial cells	Selenop	0.00585302	2.3626
Endothelial cells	Esam	0.00597266	1.56797
Endothelial cells	Alkbh8	0.00601564	3.47939
Endothelial cells	S1pr1	0.00606996	3.34289
Endothelial cells	Foxp1	0.00608552	1.50629
Endothelial cells	Olfr1423	0.00659674	2.58757
Endothelial cells	Cd200	0.00709197	2.00195
Endothelial cells	Itga6	0.00709854	1.98317
Endothelial cells	Ddah1	0.00710614	4.46435
Endothelial cells	Pex14	0.00727319	4.08368
Endothelial cells	Ddx39b	0.00730148	1.39731
Endothelial cells	Nudcd3	0.00747127	3.77447
Endothelial cells	Itprid2	0.00793046	2.88358
Endothelial cells	Rpl9-ps6	0.0081162	1.38392
Endothelial cells	Gngt2	0.00835738	3.17783
Endothelial cells	Nap1l1	0.00842547	1.86047
Endothelial cells	Fli1	0.00855164	3.61723
Endothelial cells	Arhgap31	0.00869101	2.35845
Endothelial cells	Pitpnm2	0.00870475	2.58212
Endothelial cells	Angel2	0.00870507	3.03794
Endothelial cells	Erlec1	0.00900859	4.60015
Endothelial cells	Nkap	0.00900859	4.64183
Endothelial cells	Nt5dc3	0.00900859	4.58807
Endothelial cells	Elovl7	0.00900859	4.91687
Endothelial cells	Rassf2	0.00900859	4.88254
Endothelial cells	S100a10	0.00900859	4.85293
Endothelial cells	Grk6	0.00900859	4.74887
Endothelial cells	Lsr	0.00900859	4.77451
Endothelial cells	Ccdc88c	0.00900859	4.90571
Endothelial cells	Azin1	0.00900859	4.85117
Endothelial cells	Etv6	0.00900859	4.91781
Endothelial cells	1700123O20Rik	0.00900859	4.86222
Endothelial cells	Slco1a4	0.00900859	4.85152
Endothelial cells	Lmnb1	0.00900859	4.92968
Endothelial cells	Fam43a	0.00900859	4.87296
Endothelial cells	Gm29562	0.00900859	3.93107
Endothelial cells	Kbtbd11	0.00900859	5.16222
Endothelial cells	Acy1	0.00900859	3.9432
Endothelial cells	Tnfsf13	0.00900859	3.9432
Endothelial cells	Lmcd1	0.00900859	4.00917
Endothelial cells	Stat5b	0.00900859	4.00917
Endothelial cells	Lsm11	0.00900859	4.01288
Endothelial cells	Hmgn5	0.00900859	5.40202
Endothelial cells	Tnfsf10	0.00900859	5.45275
Endothelial cells	Ythdf1	0.00900859	4.28895
Endothelial cells	Ocln	0.00900859	4.33998
Endothelial cells	Tubgcp3	0.00900859	4.31925
Endothelial cells	Nmi	0.00900859	4.34406
Endothelial cells	Efr3b	0.00900859	4.3493
Endothelial cells	Klf4	0.00900859	4.37078
Endothelial cells	Csad	0.00900859	5.62365
Endothelial cells	Ripply3	0.00900859	4.41815
Endothelial cells	Kcnj2	0.00900859	4.45432
Endothelial cells	Ccm2l	0.00900859	4.44405
Endothelial cells	Tmem208	0.00900859	4.477
Endothelial cells	Msmo1	0.00900859	4.65747
Endothelial cells	AU021092	0.00900859	4.72841
Endothelial cells	Acsl3	0.00900859	4.13183
Endothelial cells	Slc20a2	0.00900859	4.25421
Endothelial cells	Cdc42se1	0.00900859	4.15678
Endothelial cells	Trim13	0.00900859	4.15678
Endothelial cells	Zfp961	0.00900859	4.16014
Endothelial cells	Abca3	0.00900859	4.20328
Endothelial cells	Nedd4l	0.00900859	4.20328
Endothelial cells	Nsun7	0.00900859	4.22703
Endothelial cells	Sema3g	0.00900859	6.1978
Endothelial cells	Fam167b	0.00900859	4.81035
Endothelial cells	Prex2	0.00900859	5.34013
Endothelial cells	Arhgef3	0.00900859	4.38322
Endothelial cells	Nol11	0.00900859	4.94681
Endothelial cells	Hbb-bt	0.00900859	6.4559
Endothelial cells	Bhlhe40	0.00900859	5.04378
Endothelial cells	Capn7	0.00900859	4.56399
Endothelial cells	Tmem222	0.00900859	5.05214
Endothelial cells	Cenpa	0.00900859	4.59156
Endothelial cells	Cd59a	0.00900859	4.58908
Endothelial cells	Tpgs1	0.00900859	4.56712
Endothelial cells	Hells	0.00900859	4.47129
Endothelial cells	Lama5	0.00900859	4.6811
Endothelial cells	Piezo1	0.00900859	4.5168
Endothelial cells	4833403J16Rik	0.00900859	4.49802
Endothelial cells	Sox17	0.00900859	4.48921
Endothelial cells	Actl6a	0.00901843	3.96762
Endothelial cells	Mdm4	0.0090701	3.21988
Endothelial cells	Rpl36a	0.00907688	1.73158
Endothelial cells	Emcn	0.00916839	2.24407
Endothelial cells	Get4	0.00933347	3.77746
Endothelial cells	Tbx1	0.00966441	4.06429
Endothelial cells	Rpl22	0.00987445	1.26818
Endothelial cells	Fnta	0.00990274	3.72178
Endothelial cells	Mtus1	0.0102774	2.92154
Endothelial cells	Rpsa	0.0107459	1.02704
Endothelial cells	Pkm	0.0112087	1.24853
Endothelial cells	Foxo1	0.0112265	3.70005
Endothelial cells	Mafg	0.011274	2.26672
Endothelial cells	Nova2	0.0112893	3.46643
Endothelial cells	Rps21	0.0113737	1.31702
Endothelial cells	Eif3i	0.0117581	2.57789
Endothelial cells	Stx6	0.0120063	2.16303
Endothelial cells	Fgd5	0.0124048	3.50306
Endothelial cells	Marc2	0.0127582	2.18651
Endothelial cells	Rpl15	0.0128142	1.30802
Endothelial cells	Sema6a	0.012943	2.11726
Endothelial cells	Mecom	0.0129627	3.82541
Endothelial cells	Rreb1	0.0132996	3.62417
Endothelial cells	Prkab1	0.0134491	3.01448
Endothelial cells	Gm7072	0.0138568	3.35396
Endothelial cells	Rflnb	0.0139822	3.09881
Endothelial cells	Ece1	0.0141175	1.88528
Endothelial cells	Sdcbp	0.0141792	1.61172
Endothelial cells	Abcg2	0.0143249	2.43599
Endothelial cells	Id2	0.0145175	2.25248
Endothelial cells	Rgs2	0.0148053	3.62463
Endothelial cells	Mcf2l	0.0148942	4.11436
Endothelial cells	Cracr2b	0.0151291	1.76286
Endothelial cells	Tjp2	0.0153195	3.94901
Endothelial cells	Rpl32	0.015431	1.20372
Endothelial cells	Rps26	0.0158617	1.31349
Endothelial cells	Tek	0.0164661	2.28167
Endothelial cells	Sipa1	0.0176332	2.14259
Endothelial cells	Rc3h2	0.0178304	2.09235
Endothelial cells	Tirap	0.0188756	3.11196
Endothelial cells	Zmiz2	0.0189614	3.11145
Endothelial cells	Dock4	0.0190254	1.93001
Endothelial cells	Znrd1	0.0190495	2.71882
Endothelial cells	Klf2	0.0191443	3.61468
Endothelial cells	Ube2g1	0.0195865	2.992
Endothelial cells	Ets2	0.0200714	1.9809
Endothelial cells	Jcad	0.0201254	2.55353
Endothelial cells	Stag2	0.0201622	2.68812
Endothelial cells	Fxyd5	0.0204993	2.96735
Endothelial cells	Gm17494	0.0208987	3.23697
Endothelial cells	Rps8	0.0209946	1.00655
Endothelial cells	Calcrl	0.0211149	3.13198
Endothelial cells	Smap2	0.0211454	3.01643
Endothelial cells	Ier5	0.0218667	2.73036
Endothelial cells	Tril	0.0225644	1.49663
Endothelial cells	Rpl27a	0.0227271	1.29785
Endothelial cells	Ankfy1	0.0227482	2.82605
Endothelial cells	Slc39a1	0.0227549	1.95003
Endothelial cells	Stx4a	0.0230963	2.30967
Endothelial cells	2410006H16Rik	0.0231642	2.56657
Endothelial cells	Ctdnep1	0.0232799	2.26016
Endothelial cells	Usp3	0.0239058	2.61542
Endothelial cells	Hba-a2	0.0239955	5.29577
Endothelial cells	Tmem256	0.0242691	2.07549
Endothelial cells	Rplp2	0.0246448	1.47043
Endothelial cells	Tomm7	0.0246692	2.20042
Endothelial cells	Rtraf	0.0251629	1.98548
Endothelial cells	Ddit4	0.0252218	2.20766
Endothelial cells	Tpm3	0.0252729	2.16303
Endothelial cells	Cthrc1	0.0255662	4.05216
Endothelial cells	Ablim1	0.0256145	2.20115
Endothelial cells	Pfn1	0.0265201	1.18889
Endothelial cells	Gm45833	0.0272843	1.94546
Endothelial cells	Arrb1	0.0279168	2.70943
Endothelial cells	Snhg20	0.0279759	2.34987
Endothelial cells	AW549877	0.0288997	3.92722
Endothelial cells	Pitpna	0.0292092	2.83415
Endothelial cells	Tmem223	0.0295628	3.97019
Endothelial cells	Mybbp1a	0.0297255	3.64817
Endothelial cells	Tmco1	0.0299425	2.31357
Endothelial cells	Tmem250-ps	0.031213	2.69155
Endothelial cells	Naa15	0.0316654	2.29174
Endothelial cells	Slc30a5	0.0318138	3.58172
Endothelial cells	Ccdc85b	0.0318798	2.73884
Endothelial cells	Rfk	0.0322158	3.50344
Endothelial cells	Usp46	0.0334229	3.53272
Endothelial cells	Qk	0.0335052	1.13302
Endothelial cells	Scarf1	0.0335418	2.14495
Endothelial cells	Pcmtd1	0.0336135	2.73104
Endothelial cells	Fryl	0.0339344	3.2218
Endothelial cells	Tm6sf1	0.0342047	3.24207
Endothelial cells	Tpra1	0.0346239	3.31689
Endothelial cells	Ywhah	0.0346767	2.03022
Endothelial cells	Afdn	0.0352704	3.2552
Endothelial cells	Luzp1	0.0354823	2.24239
Endothelial cells	Brd2	0.0355724	1.84781
Endothelial cells	Mxra7	0.0356976	2.63172
Endothelial cells	Man1a	0.0359306	5.30881
Endothelial cells	Itga9	0.0359306	5.34939
Endothelial cells	Elmod3	0.0359306	4.95884
Endothelial cells	Utp6	0.0359306	3.83529
Endothelial cells	Pdia5	0.0359306	3.83529
Endothelial cells	Ccdc58	0.0359306	3.83529
Endothelial cells	Stap2	0.0359306	3.83529
Endothelial cells	Sms	0.0359306	5.33704
Endothelial cells	Bud13	0.0359306	3.87154
Endothelial cells	Trim37	0.0359306	3.87154
Endothelial cells	Pum3	0.0359306	3.87154
Endothelial cells	Mzt1	0.0359306	3.87881
Endothelial cells	Wdr43	0.0359306	3.87881
Endothelial cells	Pkn3	0.0359306	3.91187
Endothelial cells	Zdhhc21	0.0359306	3.91187
Endothelial cells	Mrps7	0.0359306	3.91187
Endothelial cells	Exoc7	0.0359306	3.91187
Endothelial cells	Donson	0.0359306	3.91187
Endothelial cells	Slc19a3	0.0359306	4.02236
Endothelial cells	Tex2	0.0359306	4.02236
Endothelial cells	Bclaf3	0.0359306	4.02236
Endothelial cells	Meox1	0.0359306	4.03631
Endothelial cells	Usp16	0.0359306	4.04359
Endothelial cells	Pkp4	0.0359306	4.05634
Endothelial cells	Frem2	0.0359306	4.05634
Endothelial cells	Fbf1	0.0359306	4.05634
Endothelial cells	Acox1	0.0359306	4.05634
Endothelial cells	Abcb1b	0.0359306	3.78825
Endothelial cells	Ager	0.0359306	3.78825
Endothelial cells	Vps37c	0.0359306	3.78825
Endothelial cells	Epm2a	0.0359306	4.44794
Endothelial cells	Ndufaf1	0.0359306	4.49847
Endothelial cells	Bhlhe41	0.0359306	4.45281
Endothelial cells	Pmvk	0.0359306	3.56788
Endothelial cells	Prom1	0.0359306	3.56788
Endothelial cells	Trnt1	0.0359306	3.56788
Endothelial cells	Gsr	0.0359306	3.56788
Endothelial cells	Arsa	0.0359306	3.56788
Endothelial cells	Atrn	0.0359306	3.75151
Endothelial cells	Gtpbp6	0.0359306	3.75151
Endothelial cells	Dapk1	0.0359306	3.75151
Endothelial cells	Serf1	0.0359306	3.75151
Endothelial cells	Lrch1	0.0359306	3.75151
Endothelial cells	Pim3	0.0359306	3.75151
Endothelial cells	Rpp30	0.0359306	3.75151
Endothelial cells	Cntln	0.0359306	3.75595
Endothelial cells	Dusp18	0.0359306	3.75595
Endothelial cells	Nqo2	0.0359306	3.75595
Endothelial cells	Fam53a	0.0359306	3.58452
Endothelial cells	Mrps22	0.0359306	3.67328
Endothelial cells	Ubox5	0.0359306	4.59792
Endothelial cells	B4galt5	0.0359306	4.59792
Endothelial cells	Pdik1l	0.0359306	3.65763
Endothelial cells	Ccdc141	0.0359306	4.6208
Endothelial cells	Enpp5	0.0359306	4.6208
Endothelial cells	Xpo1	0.0359306	3.70746
Endothelial cells	Prkx	0.0359306	3.71203
Endothelial cells	Coa7	0.0359306	4.60067
Endothelial cells	4921531C22Rik	0.0359306	4.59627
Endothelial cells	Enpp2	0.0359306	4.59627
Endothelial cells	Rbm43	0.0359306	3.63243
Endothelial cells	Vps53	0.0359306	3.63243
Endothelial cells	Msh2	0.0359306	3.63243
Endothelial cells	Gm42696	0.0359306	4.5508
Endothelial cells	Ipo13	0.0359306	3.69218
Endothelial cells	Tbc1d15	0.0359306	3.69218
Endothelial cells	Pank4	0.0359306	3.6968
Endothelial cells	P2rx7	0.0359306	3.6968
Endothelial cells	B230307C23Rik	0.0359306	3.6968
Endothelial cells	Mapk1ip1	0.0359306	4.97506
Endothelial cells	Slc38a6	0.0359306	5.44205
Endothelial cells	Exoc3l2	0.0359306	4.28843
Endothelial cells	Hhat	0.0359306	3.66758
Endothelial cells	Cadm1	0.0359306	3.66758
Endothelial cells	Impdh1	0.0359306	4.26189
Endothelial cells	Mbd5	0.0359306	3.67228
Endothelial cells	Bach2	0.0359306	3.67228
Endothelial cells	Sh3bp5	0.0359306	3.67228
Endothelial cells	Gprasp2	0.0359306	4.32034
Endothelial cells	Hdgfl3	0.0359306	4.92927
Endothelial cells	Skida1	0.0359306	4.31037
Endothelial cells	Gpsm2	0.0359306	4.91837
Endothelial cells	Tmem100	0.0359306	5.41462
Endothelial cells	Zbtb48	0.0359306	4.88889
Endothelial cells	Gpr182	0.0359306	4.38662
Endothelial cells	Dhx8	0.0359306	4.38662
Endothelial cells	Ccdc86	0.0359306	4.38662
Endothelial cells	Slc43a1	0.0359306	3.94403
Endothelial cells	Stat2	0.0359306	3.94403
Endothelial cells	Irx3	0.0359306	4.42741
Endothelial cells	Tmem229b	0.0359306	4.85219
Endothelial cells	Zfhx2	0.0359306	4.48452
Endothelial cells	Rgmb	0.0359306	4.48452
Endothelial cells	Mapk14	0.0359306	4.45314
Endothelial cells	Eef2kmt	0.0359306	4.83505
Endothelial cells	Myg1	0.0359306	3.89224
Endothelial cells	Homer3	0.0359306	4.14239
Endothelial cells	Rxrb	0.0359306	4.14239
Endothelial cells	Ranbp10	0.0359306	4.139
Endothelial cells	Slc38a9	0.0359306	4.139
Endothelial cells	Hmces	0.0359306	4.17176
Endothelial cells	Gm26862	0.0359306	4.17176
Endothelial cells	Yju2	0.0359306	4.17176
Endothelial cells	Mtif2	0.0359306	4.681
Endothelial cells	Ncmap	0.0359306	4.16844
Endothelial cells	1700069L16Rik	0.0359306	4.16844
Endothelial cells	Arntl	0.0359306	4.16844
Endothelial cells	Smad2	0.0359306	4.16844
Endothelial cells	Kdm4c	0.0359306	4.2046
Endothelial cells	Tox3	0.0359306	4.20135
Endothelial cells	Xlr	0.0359306	4.20135
Endothelial cells	Gm20033	0.0359306	4.14369
Endothelial cells	Hdhd5	0.0359306	4.14369
Endothelial cells	Znrf3	0.0359306	4.14369
Endothelial cells	Dock9	0.0359306	4.14369
Endothelial cells	Tubb6	0.0359306	4.14971
Endothelial cells	Fam174b	0.0359306	4.80983
Endothelial cells	Tnfrsf1b	0.0359306	4.1719
Endothelial cells	Kxd1	0.0359306	4.84913
Endothelial cells	Tspyl2	0.0359306	4.84913
Endothelial cells	Atg4c	0.0359306	4.07958
Endothelial cells	Kidins220	0.0359306	4.29542
Endothelial cells	Rsad2	0.0359306	4.29542
Endothelial cells	Eri2	0.0359306	4.29237
Endothelial cells	Ankrd29	0.0359306	4.30698
Endothelial cells	Zfp788	0.0359306	4.11024
Endothelial cells	Larp7	0.0359306	4.31
Endothelial cells	Zc3h13	0.0359306	4.31
Endothelial cells	Wdr4	0.0359306	4.3206
Endothelial cells	C430049B03Rik	0.0359306	4.3206
Endothelial cells	Dennd6a	0.0359306	4.0987
Endothelial cells	Myct1	0.0359306	4.14449
Endothelial cells	Azi2	0.0359306	4.26968
Endothelial cells	Ass1	0.0359306	4.13322
Endothelial cells	Sema7a	0.0359306	4.13322
Endothelial cells	Mpp7	0.0359306	4.13322
Endothelial cells	2810006K23Rik	0.0359306	4.28758
Endothelial cells	Wrb	0.0359306	4.29835
Endothelial cells	Wdr75	0.0359306	4.08018
Endothelial cells	Ppp1r9a	0.0359306	4.08018
Endothelial cells	Fkbpl	0.0359306	4.08018
Endothelial cells	Fam122b	0.0359306	4.08018
Endothelial cells	Dera	0.0359306	4.08647
Endothelial cells	Klk8	0.0359306	4.08647
Endothelial cells	Gm9917	0.0359306	4.20397
Endothelial cells	Gimap8	0.0359306	5.54551
Endothelial cells	Tigd2	0.0359306	3.22693
Endothelial cells	Alms1	0.0359306	3.22693
Endothelial cells	Bnip3	0.0359306	3.22693
Endothelial cells	Dapk3	0.0359306	3.22693
Endothelial cells	2210016F16Rik	0.0359306	3.22693
Endothelial cells	Gxylt1	0.0359306	3.22693
Endothelial cells	Hspa13	0.0359306	3.22693
Endothelial cells	Kcnb1	0.0359306	4.11514
Endothelial cells	Tbck	0.0359306	4.11514
Endothelial cells	Gask1b	0.0359306	4.25735
Endothelial cells	Entpd7	0.0359306	4.25735
Endothelial cells	Ppa1	0.0359306	3.26022
Endothelial cells	Apaf1	0.0359306	3.26022
Endothelial cells	Fam120b	0.0359306	3.26022
Endothelial cells	Arxes2	0.0359306	3.26022
Endothelial cells	Rnf125	0.0359306	4.26834
Endothelial cells	Ramp3	0.0359306	4.2285
Endothelial cells	Csf2rb	0.0359306	4.2285
Endothelial cells	Hspa12b	0.0359306	4.24693
Endothelial cells	Mknk1	0.0359306	4.23023
Endothelial cells	Zfp366	0.0359306	4.23023
Endothelial cells	Rab29	0.0359306	4.24143
Endothelial cells	Taf1a	0.0359306	4.24143
Endothelial cells	Pld2	0.0359306	4.24143
Endothelial cells	Ndor1	0.0359306	3.33971
Endothelial cells	Nrros	0.0359306	4.44747
Endothelial cells	Tmbim1	0.0359306	3.38264
Endothelial cells	Gm44053	0.0359306	3.38264
Endothelial cells	Dab2	0.0359306	3.38264
Endothelial cells	Prodh	0.0359306	3.38264
Endothelial cells	Pigf	0.0359306	3.38264
Endothelial cells	Klhl20	0.0359306	3.38837
Endothelial cells	Disp1	0.0359306	3.38837
Endothelial cells	Shf	0.0359306	3.38837
Endothelial cells	Atad3a	0.0359306	3.38837
Endothelial cells	Antxr2	0.0359306	3.38837
Endothelial cells	Zfp607a	0.0359306	3.38837
Endothelial cells	Igflr1	0.0359306	3.38837
Endothelial cells	Pcdhb17	0.0359306	3.38837
Endothelial cells	Gm43920	0.0359306	4.81804
Endothelial cells	Seh1l	0.0359306	4.8578
Endothelial cells	Nprl2	0.0359306	4.53572
Endothelial cells	She	0.0359306	5.00751
Endothelial cells	Icam1	0.0359306	4.77179
Endothelial cells	Grp	0.0359306	4.81496
Endothelial cells	3110082I17Rik	0.0359306	4.76804
Endothelial cells	Wscd1	0.0359306	4.80371
Endothelial cells	Atl2	0.03653	3.24969
Endothelial cells	Uri1	0.0369774	3.39932
Endothelial cells	Snn	0.0372721	3.36629
Endothelial cells	Plcg1	0.0373639	3.89533
Endothelial cells	Tspan5	0.0376352	3.26473
Endothelial cells	Hey1	0.0377906	3.71841
Endothelial cells	Rps28	0.037914	1.27008
Endothelial cells	Fkbp3	0.0380772	1.97686
Endothelial cells	Btf3	0.0390258	1.48064
Endothelial cells	Rfc3	0.0390588	2.46743
Endothelial cells	Pgls	0.040169	2.72288
Endothelial cells	Exoc5	0.0413264	2.24617
Endothelial cells	Taf8	0.041422	3.31224
Endothelial cells	Pcnx	0.0414244	2.26149
Endothelial cells	Rnf144a	0.0414269	2.59601
Endothelial cells	Cep68	0.0417605	3.76585
Endothelial cells	Trappc1	0.0418919	3.32873
Endothelial cells	Dctn5	0.0424623	1.80582
Endothelial cells	Atp5l	0.0426361	1.60253
Endothelial cells	Midn	0.0439453	2.17557
Endothelial cells	Hbb-bs	0.0445655	5.73249
Endothelial cells	Sod1	0.0446338	1.21409
Endothelial cells	Pqlc1	0.0447136	3.1648
Endothelial cells	Utp15	0.0453306	3.08489
Endothelial cells	Smtn	0.0456054	3.30648
Endothelial cells	Lta4h	0.0458683	1.73006
Endothelial cells	Cav1	0.0460219	2.82062
Endothelial cells	Dap3	0.046093	3.08654
Endothelial cells	Flnb	0.0461497	2.96444
Endothelial cells	Ppp1r16b	0.0465768	3.23659
Endothelial cells	Sec61g	0.0469086	1.58602
Endothelial cells	Bambi	0.0470903	2.62164
Endothelial cells	Clpb	0.0484775	3.08744
Endothelial cells	Trappc8	0.0496288	2.71408
Pericytes	Pdgfrb	2.15125e-10	7.64282
Pericytes	Serpine2	2.15125e-10	4.75162
Pericytes	Cryab	2.15125e-10	7.49834
Pericytes	Mgp	2.15125e-10	4.24071
Pericytes	F2r	2.15125e-10	4.05491
Pericytes	Nrep	2.15125e-10	3.81775
Pericytes	Rgs5	2.60483e-09	4.19359
Pericytes	Efhd2	7.34908e-09	6.43145
Pericytes	Ndufa4l2	7.34908e-09	6.84999
Pericytes	Itga1	1.29066e-08	3.61477
Pericytes	Col1a2	1.25426e-07	4.9208
Pericytes	Gucy1a1	1.84845e-07	3.96562
Pericytes	Notch3	2.6699e-07	4.39279
Pericytes	Meg3	3.12574e-07	6.20494
Pericytes	Parm1	3.8343e-07	6.05774
Pericytes	Pcdh18	4.21531e-07	4.10718
Pericytes	Cald1	9.05085e-07	2.22635
Pericytes	Cspg4	9.07691e-07	4.70919
Pericytes	Myl9	9.39326e-07	3.49102
Pericytes	Ajuba	1.68292e-06	5.34858
Pericytes	Pten	1.68292e-06	5.80946
Pericytes	Postn	1.68292e-06	5.86431
Pericytes	Sept4	1.80098e-06	3.35903
Pericytes	Ednra	1.85118e-06	4.32899
Pericytes	Fstl1	2.12802e-06	1.56358
Pericytes	Lrp1	5.57519e-06	4.44489
Pericytes	Arhgap42	6.1227e-06	5.11611
Pericytes	Epb41l1	6.1227e-06	6.01564
Pericytes	Arhgef17	6.1227e-06	5.48478
Pericytes	Atp1b2	1.04191e-05	3.30677
Pericytes	Sept7	1.04608e-05	2.89601
Pericytes	Dleu2	1.22431e-05	4.26696
Pericytes	Timp2	1.92869e-05	4.31823
Pericytes	Higd1b	1.93749e-05	5.90831
Pericytes	Cd63	1.93749e-05	5.23708
Pericytes	Tns3	1.93749e-05	5.53775
Pericytes	Zfp703	1.93749e-05	5.25038
Pericytes	Arhgdib	1.93749e-05	5.63874
Pericytes	Gucy1b1	1.93749e-05	5.90349
Pericytes	Cfh	2.4072e-05	3.55164
Pericytes	Sept11	2.45919e-05	2.81364
Pericytes	Nr2f2	2.90872e-05	2.85098
Pericytes	Heyl	2.93357e-05	2.89454
Pericytes	Zic1	3.31937e-05	4.32974
Pericytes	Atp1a2	4.68866e-05	3.89487
Pericytes	Tbx2	5.50058e-05	5.72098
Pericytes	Cisd3	5.50058e-05	5.22885
Pericytes	Aspn	5.50058e-05	5.75947
Pericytes	Plat	5.50058e-05	5.27305
Pericytes	Agrn	5.63568e-05	2.31496
Pericytes	Mfge8	5.99882e-05	3.09548
Pericytes	Ifitm1	7.23549e-05	2.64182
Pericytes	Abcc9	0.000100978	3.88862
Pericytes	Col4a1	0.000139648	1.12836
Pericytes	Mylk	0.000142228	2.17368
Pericytes	Pdlim1	0.000143145	5.48812
Pericytes	Nedd8	0.000143145	4.74416
Pericytes	Nuak1	0.000143145	4.67838
Pericytes	Pcolce	0.000143145	5.01925
Pericytes	Tbxa2r	0.000143145	5.18605
Pericytes	Specc1	0.000143145	5.29051
Pericytes	Dmd	0.000209306	2.88269
Pericytes	Pde5a	0.000238456	3.49111
Pericytes	Lamb1	0.000275107	3.32277
Pericytes	Prkcb	0.000289224	3.32305
Pericytes	Lhfp	0.000299383	3.4672
Pericytes	Nid1	0.000299734	1.2454
Pericytes	Col3a1	0.000300596	4.44627
Pericytes	Lamc1	0.000339226	1.54957
Pericytes	Tecpr1	0.000346866	4.58112
Pericytes	Cdh11	0.000346866	4.65462
Pericytes	Fat1	0.000346866	4.88783
Pericytes	Agap1	0.000346866	5.08073
Pericytes	Acadl	0.000346866	4.99281
Pericytes	Mark1	0.000346866	4.96508
Pericytes	Vstm4	0.000346866	5.11084
Pericytes	Tcf7l1	0.000346866	5.24549
Pericytes	Gfra2	0.000346866	4.4647
Pericytes	Loxl3	0.000346866	5.29503
Pericytes	Zcchc14	0.000346866	4.18324
Pericytes	Inpp4b	0.000346866	5.14909
Pericytes	Dlk1	0.000346866	4.89134
Pericytes	Gja4	0.000375282	2.35643
Pericytes	Axl	0.000378571	2.86782
Pericytes	Ubr5	0.000381058	3.47308
Pericytes	Zfr	0.000389814	3.93139
Pericytes	Dkk3	0.000414112	2.16186
Pericytes	S1pr3	0.000435644	2.77402
Pericytes	Slc12a2	0.00045387	1.9032
Pericytes	Wls	0.000458416	2.99734
Pericytes	Prrx1	0.000494125	4.3241
Pericytes	Cnn2	0.000511548	1.99501
Pericytes	Higd2a	0.000542662	2.79967
Pericytes	Ebf1	0.000577718	1.95474
Pericytes	Dact1	0.000673972	3.53204
Pericytes	Cmtm3	0.000751945	2.90995
Pericytes	Atp6v1d	0.000792091	5.52729
Pericytes	Itgb5	0.000792091	5.26713
Pericytes	Hspb1	0.000792091	5.28138
Pericytes	Tagln	0.000792091	5.21853
Pericytes	Cox4i2	0.000792091	4.24708
Pericytes	Selenom	0.000792091	4.74249
Pericytes	Ogn	0.000792091	5.45883
Pericytes	Fads3	0.000792091	4.59649
Pericytes	Mrvi1	0.000792091	4.08186
Pericytes	Foxs1	0.000792091	4.55069
Pericytes	Itpripl2	0.000792091	4.25797
Pericytes	Prkar2b	0.000792091	4.7507
Pericytes	Art3	0.000792091	4.43485
Pericytes	Abhd4	0.000792091	4.77865
Pericytes	Slc19a1	0.000792091	4.46204
Pericytes	Spon2	0.000792091	4.73804
Pericytes	Limd2	0.000792091	4.48273
Pericytes	Ggt5	0.000792091	4.47851
Pericytes	Slc38a11	0.000792091	4.41965
Pericytes	Pkd2	0.000792091	4.61256
Pericytes	Nbr1	0.000792091	4.56994
Pericytes	Nf1	0.000792091	4.48463
Pericytes	Pdlim2	0.000792091	4.656
Pericytes	Cdh6	0.000792091	5.10984
Pericytes	Fermt2	0.000800059	2.16076
Pericytes	Ankrd50	0.000826803	3.31877
Pericytes	Itga7	0.00090899	3.95166
Pericytes	Cd248	0.000917769	2.60711
Pericytes	Igf2r	0.000920986	2.90641
Pericytes	Rras	0.000933611	2.22387
Pericytes	Plekhg2	0.000978734	3.27298
Pericytes	Cdc42ep4	0.00122356	3.40578
Pericytes	Chmp4b	0.00135884	3.2806
Pericytes	Sdc2	0.00138173	2.57123
Pericytes	Pid1	0.00145502	3.15697
Pericytes	Kcnj8	0.00154122	3.36381
Pericytes	Uqcrh	0.00154765	1.98672
Pericytes	Serinc3	0.00171855	1.10496
Pericytes	Arhgef25	0.00172086	4.07694
Pericytes	Atp13a5	0.00172086	4.86981
Pericytes	Hacd4	0.00172086	3.77529
Pericytes	Rasl12	0.00172086	4.79847
Pericytes	Bicc1	0.00172086	3.97781
Pericytes	Il34	0.00172086	4.5057
Pericytes	Mirg	0.00172086	4.0379
Pericytes	Cacna1c	0.00172086	4.21391
Pericytes	Pik3cd	0.00172086	4.18071
Pericytes	Sp6	0.00172086	4.6655
Pericytes	Pde8b	0.00172086	4.23655
Pericytes	Fcgrt	0.00172086	4.49589
Pericytes	4833422C13Rik	0.00172086	4.23313
Pericytes	Nck2	0.00172086	4.26346
Pericytes	Angpt2	0.00172086	4.41022
Pericytes	Vtn	0.00172086	4.36548
Pericytes	Plekha2	0.00172086	4.53015
Pericytes	Prdx3	0.00172086	4.54977
Pericytes	Ifi27	0.00172086	4.59947
Pericytes	Adap2	0.00172086	4.49352
Pericytes	Enpep	0.00172086	4.81718
Pericytes	Msi2	0.00172328	2.72312
Pericytes	Foxc1	0.00173464	2.51672
Pericytes	Tspan3	0.00178902	3.19775
Pericytes	Plce1	0.0018467	4.25924
Pericytes	Actr3	0.00186094	2.7124
Pericytes	Ccni	0.00226957	2.39454
Pericytes	Rgs7bp	0.0022763	3.86421
Pericytes	Uaca	0.00234168	1.8276
Pericytes	Tnks1bp1	0.00238199	3.44741
Pericytes	Dennd5a	0.00251696	2.7722
Pericytes	Tspan12	0.00254889	3.35583
Pericytes	Pygm	0.00256234	3.15493
Pericytes	Itgav	0.00266993	3.30756
Pericytes	Zeb2	0.00271522	2.58591
Pericytes	Des	0.00272811	3.03019
Pericytes	Elmo2	0.00287104	2.87564
Pericytes	Pafah1b1	0.00290474	3.05348
Pericytes	Lrrc8b	0.00290884	2.37917
Pericytes	Ucp2	0.00337998	3.5373
Pericytes	Vcl	0.00348652	2.32204
Pericytes	Hmgcs2	0.00358492	3.94607
Pericytes	Sesn3	0.00358492	4.13653
Pericytes	Phactr2	0.00358492	3.96003
Pericytes	Fam162b	0.00358492	4.39146
Pericytes	Morrbid	0.00358492	3.73481
Pericytes	Ncf2	0.00358492	4.45889
Pericytes	Lactb2	0.00358492	3.83949
Pericytes	Scarf2	0.00358492	4.13724
Pericytes	Lama2	0.00358492	3.93268
Pericytes	Smad4	0.00358492	3.62746
Pericytes	Anpep	0.00358492	3.74435
Pericytes	Prkar1b	0.00358492	4.10592
Pericytes	Ppp2r2a	0.00358492	3.6872
Pericytes	Cpped1	0.00358492	3.66727
Pericytes	Blmh	0.00358492	3.82714
Pericytes	Cyth3	0.00358492	3.72164
Pericytes	Nkd2	0.00358492	4.18404
Pericytes	Pfkp	0.00358492	3.76505
Pericytes	Arhgap24	0.00358492	3.86552
Pericytes	Klhl24	0.00358492	3.78015
Pericytes	Zc2hc1a	0.00358492	3.84843
Pericytes	Dbndd2	0.00358492	4.04047
Pericytes	Tmem165	0.00358492	3.90171
Pericytes	Ctdspl	0.00358492	4.02982
Pericytes	Cdk14	0.00358492	3.96794
Pericytes	Ndufs5	0.00358492	4.14724
Pericytes	Ptpn1	0.00358492	4.13803
Pericytes	Cd302	0.00358492	4.04192
Pericytes	Rgs4	0.00358492	4.22202
Pericytes	Ppp4r3a	0.00358492	4.32096
Pericytes	Kctd11	0.00358492	4.1682
Pericytes	Rian	0.00358492	4.46756
Pericytes	Ago2	0.00358492	4.22137
Pericytes	Lipo3	0.00358492	4.25563
Pericytes	Vamp3	0.00358492	4.40172
Pericytes	Gnai3	0.00358492	4.34663
Pericytes	Ano1	0.00358492	4.41779
Pericytes	Rmnd5a	0.00358492	4.47501
Pericytes	Cysltr2	0.00358492	4.65258
Pericytes	Pmp22	0.00358492	4.05155
Pericytes	Acta2	0.00366078	2.1701
Pericytes	Rbms3	0.00368794	3.91548
Pericytes	Mdh1	0.00383907	2.14576
Pericytes	Pdgfa	0.00411919	2.12082
Pericytes	Bgn	0.00423575	1.45125
Pericytes	Calm3	0.0042934	1.48552
Pericytes	Src	0.00436318	3.2242
Pericytes	Ndufb3	0.00439696	3.08762
Pericytes	Mcam	0.00465426	1.17996
Pericytes	Dync1i2	0.00476028	2.18968
Pericytes	Egflam	0.00486591	3.3951
Pericytes	Nes	0.00527356	2.00609
Pericytes	Kcnq1ot1	0.00551275	3.14802
Pericytes	Tagln2	0.00573231	2.08207
Pericytes	Ndufb9	0.00589065	2.76831
Pericytes	Filip1l	0.00624218	3.10497
Pericytes	Cdk6	0.0063276	3.10628
Pericytes	Tceal9	0.00635214	1.96721
Pericytes	Iqgap1	0.00641745	2.26375
Pericytes	Myl12a	0.00644822	1.05617
Pericytes	Bloc1s1	0.00685671	3.07179
Pericytes	Sort1	0.00693981	2.81195
Pericytes	4931406P16Rik	0.00698479	1.7663
Pericytes	Ndufa13	0.00704771	2.18255
Pericytes	Bmp5	0.00720951	3.30422
Pericytes	Ier5l	0.00720951	3.47402
Pericytes	Tbx3	0.00720951	3.85757
Pericytes	Apobec1	0.00720951	4.14316
Pericytes	Tyk2	0.00720951	4.25766
Pericytes	Pde4d	0.00720951	3.53486
Pericytes	C1s1	0.00720951	4.7303
Pericytes	Chpf	0.00720951	3.50929
Pericytes	Oxr1	0.00720951	3.97439
Pericytes	Stxbp1	0.00720951	3.66935
Pericytes	Btd	0.00720951	3.98191
Pericytes	Ankib1	0.00720951	3.5327
Pericytes	Ptprf	0.00720951	3.63304
Pericytes	Ndst3	0.00720951	3.5792
Pericytes	Gprc5c	0.00720951	3.73527
Pericytes	Aoc3	0.00720951	4.8672
Pericytes	Akap7	0.00720951	3.65725
Pericytes	Foxc2	0.00720951	3.74841
Pericytes	Zbtb43	0.00720951	3.85784
Pericytes	Osbpl5	0.00720951	3.84684
Pericytes	Bmpr1a	0.00720951	4.21919
Pericytes	Rictor	0.00720951	3.98657
Pericytes	Tmx3	0.00720951	3.91131
Pericytes	Ddx1	0.00720951	3.87535
Pericytes	Ptar1	0.00720951	4.32102
Pericytes	Tbx18	0.00720951	3.81373
Pericytes	Tpm2	0.00720951	3.95143
Pericytes	Prkab2	0.00720951	3.8674
Pericytes	Commd3	0.00720951	4.33178
Pericytes	Plekhg3	0.00720951	3.86637
Pericytes	Htr1b	0.00720951	3.8817
Pericytes	Tspan17	0.00720951	4.08682
Pericytes	Extl3	0.00720951	4.57598
Pericytes	Hacd2	0.00720951	4.07111
Pericytes	Lama1	0.00720951	4.26414
Pericytes	Lrrc4c	0.00720951	4.19209
Pericytes	Zcchc24	0.00720951	4.54217
Pericytes	Ccdc124	0.00720951	3.81158
Pericytes	Ctsd	0.00720951	3.64153
Pericytes	Rarres2	0.00720951	3.10066
Pericytes	Hsd17b11	0.00720951	3.643
Pericytes	Cstb	0.0073924	2.58047
Pericytes	Thra	0.00740573	2.24342
Pericytes	Cdc42bpa	0.00754753	2.80388
Pericytes	Map3k20	0.00768091	2.47812
Pericytes	Anxa6	0.00803969	1.66947
Pericytes	Lasp1	0.00824852	1.99012
Pericytes	Anxa5	0.0084764	2.51768
Pericytes	Cacna2d1	0.00857975	2.4872
Pericytes	Isyna1	0.00866425	2.40591
Pericytes	Kank2	0.00872385	2.5914
Pericytes	Sept8	0.00920064	2.44216
Pericytes	Pdzd2	0.00957252	2.09624
Pericytes	Tra2b	0.0100577	2.22999
Pericytes	Fry	0.0101696	3.06369
Pericytes	Zmynd11	0.0102466	1.83482
Pericytes	Cdkn1c	0.0103093	2.45363
Pericytes	Lgals1	0.0106379	1.16725
Pericytes	2310022B05Rik	0.0107718	2.53363
Pericytes	Akap12	0.0108705	1.63438
Pericytes	Actn1	0.0110452	1.89365
Pericytes	Nptn	0.0114628	2.70106
Pericytes	App	0.0116228	1.05205
Pericytes	Flna	0.0116553	1.51407
Pericytes	Mndal	0.0117352	2.71955
Pericytes	Pik3r1	0.0122829	2.70656
Pericytes	Slc44a2	0.0123783	2.16222
Pericytes	Dctn1	0.0128216	2.61794
Pericytes	Sin3b	0.0133593	2.9106
Pericytes	Cobll1	0.013504	1.91629
Pericytes	Setd2	0.0136285	2.7697
Pericytes	Mgll	0.0137289	2.67034
Pericytes	Frmd4a	0.0140683	2.78514
Pericytes	Ube2l6	0.0140828	3.31241
Pericytes	Gpsm3	0.0140828	3.58534
Pericytes	Traf4	0.0140828	3.3718
Pericytes	Map3k12	0.0140828	3.35624
Pericytes	Ubl7	0.0140828	3.53805
Pericytes	Frk	0.0140828	3.60214
Pericytes	Proser2	0.0140828	3.54863
Pericytes	Tstd3	0.0140828	3.45244
Pericytes	Nln	0.0140828	3.42321
Pericytes	Gtf2ird1	0.0140828	3.9094
Pericytes	Agpat5	0.0140828	3.4572
Pericytes	Prpf38b	0.0140828	3.41895
Pericytes	Rnase4	0.0140828	3.44353
Pericytes	Kcne4	0.0140828	3.58777
Pericytes	Apold1	0.0140828	3.88917
Pericytes	Zfp598	0.0140828	3.44774
Pericytes	Nectin3	0.0140828	3.50328
Pericytes	Cltb	0.0140828	3.96462
Pericytes	Plxna1	0.0140828	3.62171
Pericytes	Hadhb	0.0140828	3.49447
Pericytes	Rnd3	0.0140828	3.70969
Pericytes	Taok3	0.0140828	4.42065
Pericytes	Cebpz	0.0140828	3.79774
Pericytes	Cabin1	0.0140828	4.05412
Pericytes	Edem3	0.0140828	3.65651
Pericytes	Pkig	0.0140828	3.57811
Pericytes	Dock10	0.0140828	4.08983
Pericytes	Iigp1	0.0140828	3.78438
Pericytes	Mcmbp	0.0140828	3.78338
Pericytes	Dhx33	0.0140828	3.75789
Pericytes	Ap3m1	0.0140828	3.83388
Pericytes	Supt5	0.0140828	3.69255
Pericytes	Mtcl1	0.0140828	3.68017
Pericytes	Abca7	0.0140828	3.74658
Pericytes	Lipa	0.0140828	3.70638
Pericytes	Zbed3	0.0140828	3.85892
Pericytes	Nfatc4	0.0140828	3.89529
Pericytes	Arhgap6	0.0140828	3.90133
Pericytes	Lgals3bp	0.0140828	3.70833
Pericytes	Rgs6	0.0140828	3.94432
Pericytes	Hmg20a	0.0140828	3.81407
Pericytes	Nagk	0.0140828	3.96106
Pericytes	Rasl11a	0.0140828	4.2302
Pericytes	Tfap2b	0.0140828	4.02451
Pericytes	Fbn2	0.0140828	4.0117
Pericytes	Sgip1	0.0140828	4.12738
Pericytes	Cp	0.0140828	3.89989
Pericytes	Ncald	0.0140828	4.03031
Pericytes	Lrpprc	0.0140828	4.12512
Pericytes	Gm14964	0.0140828	3.06841
Pericytes	Gipc1	0.0140828	3.39887
Pericytes	Yae1d1	0.0140828	2.83715
Pericytes	Cdc27	0.0140828	3.14481
Pericytes	Begain	0.0140828	3.57972
Pericytes	Vamp4	0.0140828	2.78723
Pericytes	Cask	0.0140828	3.2412
Pericytes	Ccdc3	0.0140828	4.01425
Pericytes	Rlim	0.0140828	2.94591
Pericytes	Hspa12a	0.0140828	3.6042
Pericytes	Lgi1	0.0140828	4.87535
Pericytes	Pnkp	0.0140828	2.92548
Pericytes	Smad7	0.0140828	2.93954
Pericytes	Hif1a	0.0140828	2.96275
Pericytes	Fam104a	0.0140828	2.95473
Pericytes	Cbr1	0.0140828	3.37447
Pericytes	Pkia	0.0140828	2.97373
Pericytes	Nlgn2	0.0140828	3.07278
Pericytes	Snx6	0.0140828	3.37242
Pericytes	Mast2	0.0140828	3.14669
Pericytes	Atp13a3	0.0140828	3.7106
Pericytes	Dnm1l	0.0140828	3.45437
Pericytes	Rhot2	0.0140828	3.11233
Pericytes	Surf1	0.0140828	3.0221
Pericytes	Fam110b	0.0140828	3.71137
Pericytes	Trpc1	0.0140828	3.12809
Pericytes	Slc38a10	0.0140828	3.02609
Pericytes	Speg	0.0140828	4.00164
Pericytes	Oxct1	0.0140828	4.20356
Pericytes	Rangap1	0.0140828	3.84544
Pericytes	C1qtnf7	0.0140828	3.15814
Pericytes	Arhgef6	0.0140828	3.97344
Pericytes	Tbrg1	0.0140828	3.17726
Pericytes	Rundc3a	0.0140828	3.22254
Pericytes	Fam210b	0.0140828	3.55307
Pericytes	Syf2	0.0140828	3.11406
Pericytes	Tubb4a	0.0140828	3.58676
Pericytes	Oat	0.0140828	3.87014
Pericytes	Klf9	0.0140828	3.88051
Pericytes	Lgmn	0.0140828	3.1586
Pericytes	A830082K12Rik	0.0140828	3.31539
Pericytes	Nmnat2	0.0140828	3.17286
Pericytes	Arfgef2	0.0140828	3.19028
Pericytes	Nek9	0.0140828	3.65947
Pericytes	Xrn1	0.0140828	3.30615
Pericytes	Tbcb	0.0140828	3.31796
Pericytes	Axin2	0.0140828	3.31187
Pericytes	Susd6	0.0140828	3.69096
Pericytes	Ergic1	0.0140828	3.63078
Pericytes	Pcm1	0.0140828	3.39685
Pericytes	Znhit1	0.0140828	3.25757
Pericytes	Ltbp3	0.0140828	3.25467
Pericytes	Ube2f	0.0140828	3.3777
Pericytes	Bdnf	0.0140828	3.38815
Pericytes	Rnft1	0.0140828	3.37078
Pericytes	Plekhh3	0.0140828	3.72126
Pericytes	Gatad1	0.0140828	3.44015
Pericytes	Ttyh2	0.0140828	3.30044
Pericytes	Vasn	0.0140828	3.71293
Pericytes	Ankrd13c	0.0140828	3.4351
Pericytes	Cep350	0.0140828	3.43935
Pericytes	Smo	0.0140828	3.34794
Pericytes	Gnb4	0.0140951	1.78092
Pericytes	Nbl1	0.0142801	2.46156
Pericytes	Zbtb34	0.0145005	1.99147
Pericytes	Lpp	0.0149694	1.71944
Pericytes	Lzts2	0.0150352	2.16016
Pericytes	Daam2	0.0153981	1.91565
Pericytes	Itga4	0.0154508	1.5309
Pericytes	Limd1	0.0155765	1.87175
Pericytes	Maged2	0.0155983	1.82439
Pericytes	Phlda1	0.0158487	1.48952
Pericytes	Snhg18	0.0164759	2.20857
Pericytes	Ccnd2	0.0164832	1.53489
Pericytes	Loxl2	0.0165514	1.27066
Pericytes	Pkd1	0.0169299	2.05145
Pericytes	Pip5k1c	0.0170693	2.57268
Pericytes	Arhgef7	0.0175973	1.15177
Pericytes	Plxnb2	0.0176118	1.1328
Pericytes	Ccdc50	0.0179537	2.10403
Pericytes	Capza1	0.0181617	2.21746
Pericytes	P3h3	0.0182793	2.30744
Pericytes	Sdhb	0.0186602	2.97359
Pericytes	Ube2r2	0.0200492	1.06781
Pericytes	H3f3b	0.020262	1.1126
Pericytes	Ctsz	0.0208711	1.73061
Pericytes	Endod1	0.0214685	1.52272
Pericytes	Zfhx3	0.0219652	1.45288
Pericytes	Atp6v1f	0.0228716	2.96658
Pericytes	Fkbp9	0.0230781	2.70424
Pericytes	Mdh2	0.0231547	1.54646
Pericytes	Lama4	0.0232051	1.4069
Pericytes	Ptpn11	0.023759	1.6938
Pericytes	Lsm14a	0.0240583	1.75763
Pericytes	Tnfrsf21	0.0241056	2.45211
Pericytes	Psmb6	0.0244972	2.48894
Pericytes	Myo1b	0.0251852	1.77411
Pericytes	Ppp6r1	0.0262009	2.68446
Pericytes	Adrm1	0.0265438	2.58351
Pericytes	Ndufs4	0.0267546	2.6475
Pericytes	Zbtb38	0.0268816	3.5761
Pericytes	Olfml2b	0.0268816	4.05576
Pericytes	H6pd	0.0268816	3.48262
Pericytes	Scamp1	0.0268816	3.64102
Pericytes	Fam193b	0.0268816	3.69084
Pericytes	Tmem50b	0.0268816	3.83549
Pericytes	Ddr1	0.0268816	3.8363
Pericytes	Trpc6	0.0268816	3.64766
Pericytes	Smim3	0.0268816	4.15494
Pericytes	Jak2	0.0268816	3.99778
Pericytes	Prr14	0.0268816	3.88738
Pericytes	Arid4b	0.0268816	3.79628
Pericytes	Stx2	0.0268816	4.37945
Pericytes	Ints6	0.0268816	3.77163
Pericytes	Max	0.0268816	4.05152
Pericytes	Kifc3	0.0268816	3.19912
Pericytes	Mrtfb	0.0268816	3.28962
Pericytes	Adamts12	0.0268816	4.06722
Pericytes	Rwdd1	0.0268816	3.28385
Pericytes	Atp6v1b2	0.0268816	3.26534
Pericytes	Fam118a	0.0268816	3.32142
Pericytes	Hilpda	0.0268816	2.42613
Pericytes	Tubg1	0.0268816	2.42613
Pericytes	Poglut3	0.0268816	3.45116
Pericytes	Rora	0.0268816	3.08743
Pericytes	Fhl2	0.0268816	3.41222
Pericytes	Klhdc3	0.0268816	2.47691
Pericytes	Mrps10	0.0268816	2.55375
Pericytes	Herc1	0.0268816	2.83571
Pericytes	Zfp322a	0.0268816	2.60247
Pericytes	Tubgcp2	0.0268816	3.2832
Pericytes	Rala	0.0268816	2.63515
Pericytes	Pth1r	0.0268816	3.76575
Pericytes	Elmsan1	0.0268816	2.91009
Pericytes	Naglu	0.0268816	2.5532
Pericytes	Tacc2	0.0268816	3.31248
Pericytes	Mapk8	0.0268816	2.58637
Pericytes	Chst12	0.0268816	2.59059
Pericytes	Hey2	0.0268816	2.74304
Pericytes	Gas2l1	0.0268816	3.25372
Pericytes	Bscl2	0.0268816	2.59044
Pericytes	Mtfr1l	0.0268816	2.75603
Pericytes	Zdhhc7	0.0268816	2.68515
Pericytes	Vps35l	0.0268816	3.38473
Pericytes	Mpp2	0.0268816	2.98342
Pericytes	Suds3	0.0268816	3.05053
Pericytes	Rbm33	0.0268816	3.06343
Pericytes	Tmed1	0.0268816	2.67254
Pericytes	Poglut2	0.0268816	2.69288
Pericytes	Wasl	0.0268816	3.79166
Pericytes	E130307A14Rik	0.0268816	3.91823
Pericytes	Msantd3	0.0268816	2.79056
Pericytes	Ecd	0.0268816	3.17642
Pericytes	Fam107b	0.0268816	3.58742
Pericytes	Tsc2	0.0268816	3.18001
Pericytes	Atad1	0.0268816	3.42508
Pericytes	Cap2	0.0268816	3.77818
Pericytes	Lmo7	0.0268816	3.10655
Pericytes	Ncbp2	0.0268816	2.73011
Pericytes	Dcbld1	0.0268816	3.45267
Pericytes	C1qtnf2	0.0268816	2.76203
Pericytes	Osmr	0.0268816	2.7548
Pericytes	Stard3nl	0.0268816	2.78144
Pericytes	Myom1	0.0268816	3.14175
Pericytes	Kcp	0.0268816	3.50818
Pericytes	Acsl1	0.0268816	3.21919
Pericytes	Maml3	0.0268816	3.49786
Pericytes	Stard9	0.0268816	3.85045
Pericytes	Naalad2	0.0268816	2.82129
Pericytes	Wdr86	0.0268816	3.49187
Pericytes	Fam20a	0.0268816	2.80231
Pericytes	Kdm3a	0.0268816	3.27739
Pericytes	Stard3	0.0268816	2.90833
Pericytes	Adcy5	0.0268816	2.81923
Pericytes	Mdga1	0.0268816	3.25643
Pericytes	Rras2	0.0268816	2.93435
Pericytes	Pgm2l1	0.0268816	3.66286
Pericytes	Clasp1	0.0268816	3.00727
Pericytes	Phb2	0.0268816	3.32508
Pericytes	Fech	0.0268816	3.30214
Pericytes	Abca8b	0.0268816	3.55162
Pericytes	Ttc14	0.0268816	3.29761
Pericytes	Hykk	0.0268816	3.69832
Pericytes	Memo1	0.0268816	2.84222
Pericytes	Pold4	0.0268816	2.95723
Pericytes	Bcl2l12	0.0268816	2.89749
Pericytes	Tbx3os1	0.0268816	2.86192
Pericytes	Gas1	0.0268816	3.60469
Pericytes	Capn6	0.0268816	3.04572
Pericytes	Mthfr	0.0268816	3.01494
Pericytes	Gm13470	0.0268816	2.92299
Pericytes	Ppard	0.0268816	3.06831
Pericytes	Il1r1	0.0268816	3.10721
Pericytes	Ccdc82	0.0268816	3.43674
Pericytes	Arhgap35	0.0268816	3.03262
Pericytes	Vwa5a	0.0268816	3.04121
Pericytes	Ccdc68	0.0268816	3.0992
Pericytes	Gramd4	0.0268816	2.97384
Pericytes	Dop1a	0.0268816	3.42775
Pericytes	Akirin2	0.0268816	3.0914
Pericytes	Thbs1	0.0268816	3.07979
Pericytes	Atp11c	0.0268816	3.11046
Pericytes	Sspn	0.0268816	3.15861
Pericytes	Psen2	0.0268816	2.98839
Pericytes	Crkl	0.0268816	3.14136
Pericytes	Adamts15	0.0268816	3.05965
Pericytes	Cpm	0.0268816	3.16796
Pericytes	Pml	0.0268816	3.59208
Pericytes	Grb14	0.0268816	3.1848
Pericytes	Asph	0.0268816	3.06688
Pericytes	Zfp467	0.0268816	3.19057
Pericytes	Kcns3	0.0268816	3.55875
Pericytes	Klhl29	0.0268816	3.11779
Pericytes	Strip1	0.0268816	3.20818
Pericytes	Snai2	0.0268816	3.5596
Pericytes	Snx18	0.0268816	3.95573
Pericytes	Runx1	0.0268816	3.26781
Pericytes	Clip3	0.0268816	3.1903
Pericytes	Rflna	0.0268816	3.19518
Pericytes	Trp53inp2	0.0268816	3.19763
Pericytes	Snrnp27	0.0268816	3.5684
Pericytes	Sgms2	0.0268816	3.55419
Pericytes	Mrc2	0.0268816	4.03388
Pericytes	Pygb	0.0268816	3.10303
Pericytes	Nolc1	0.0268816	3.26159
Pericytes	Bdp1	0.0268816	3.27209
Pericytes	Nnat	0.0268816	3.28366
Pericytes	Gab2	0.0268816	3.3047
Pericytes	Kazn	0.0268816	3.13026
Pericytes	Ramac	0.0268816	3.25548
Pericytes	Apela	0.0268816	4.22556
Pericytes	Mustn1	0.0268816	3.19295
Pericytes	Ints6l	0.0268816	3.60893
Pericytes	Bak1	0.0268816	3.1934
Pericytes	Hdhd2	0.0268816	3.17078
Pericytes	Col5a1	0.0268816	3.21745
Pericytes	Ehd3	0.0268816	3.33844
Pericytes	Chm	0.0268816	3.20269
Pericytes	Tpcn1	0.0268816	3.29947
Pericytes	Stau1	0.0268816	3.32501
Pericytes	Rnf6	0.0268816	3.38628
Pericytes	Sec61a2	0.0268816	3.73288
Pericytes	Bfar	0.0268816	3.25328
Pericytes	Atxn7l3	0.0268816	3.43809
Pericytes	Ptdss1	0.0268816	3.29034
Pericytes	Fundc1	0.0268816	3.25019
Pericytes	Rbm27	0.0268816	3.75277
Pericytes	Ankrd44	0.0268816	3.38218
Pericytes	Gna13	0.0268816	3.54988
Pericytes	Pip5k1a	0.0268816	3.80049
Pericytes	Cped1	0.0268816	3.30037
Pericytes	Abca9	0.0268816	3.43664
Pericytes	Parg	0.0268816	3.45878
Pericytes	Trip10	0.0268816	3.42758
Pericytes	Eif4e	0.0268816	3.39383
Pericytes	Kifap3	0.0268816	3.38778
Pericytes	Sh3d21	0.0268816	3.51282
Pericytes	Snapc5	0.0268816	3.63322
Pericytes	Mcrs1	0.0268816	3.64125
Pericytes	Arfip1	0.0268816	3.47412
Pericytes	Mill2	0.0268816	3.45181
Pericytes	Gcnt2	0.0271146	1.90842
Pericytes	Tcaf1	0.0276406	1.31335
Pericytes	Kat6a	0.0281278	1.62587
Pericytes	M6pr	0.0283536	1.71654
Pericytes	Sh2b3	0.0291185	1.83317
Pericytes	Pde3a	0.0295083	2.038
Pericytes	Ncam1	0.0296465	2.85696
Pericytes	Taok1	0.0304186	2.40141
Pericytes	Samd4	0.0309388	1.7954
Pericytes	Tcf12	0.0310744	1.79199
Pericytes	Rasa3	0.0313056	2.28135
Pericytes	Csk	0.0318199	1.03723
Pericytes	Egr1	0.032093	3.4365
Pericytes	Lurap1l	0.0326229	2.37993
Pericytes	Marveld1	0.0327839	1.74989
Pericytes	Gdi1	0.0329644	1.53451
Pericytes	Adam9	0.0333486	2.19007
Pericytes	Psmc5	0.0339606	2.08524
Pericytes	Chd4	0.0339755	1.84622
Pericytes	Mat2a	0.0340104	1.86035
Pericytes	Armcx3	0.0340329	1.61444
Pericytes	Klhl23	0.0341202	1.81146
Pericytes	Adcy6	0.0344413	1.52403
Pericytes	Sri	0.034514	1.40142
Pericytes	Ckap4	0.034799	1.34014
Pericytes	Pfdn1	0.0351869	1.94889
Pericytes	Ski	0.0358788	1.28081
Pericytes	Spry1	0.035958	1.6664
Pericytes	Rasgrp2	0.0362226	1.4869
Pericytes	Slc12a7	0.0366916	2.63063
Pericytes	Ppp6r3	0.0372606	2.09756
Pericytes	Dag1	0.0375708	1.52549
Pericytes	Lmna	0.0379192	1.60126
Pericytes	Stc1	0.038296	1.74377
Pericytes	Ing4	0.0388002	2.87318
Pericytes	Fnbp1	0.0392093	1.98198
Pericytes	Atn1	0.0392214	1.57721
Pericytes	Usp19	0.0392986	2.66844
Pericytes	Tm9sf2	0.0393832	1.44939
Pericytes	Prelid1	0.0398418	1.53262
Pericytes	Uba2	0.0400961	1.85841
Pericytes	Tuba1a	0.0401456	1.07821
Pericytes	Adgra2	0.0408124	1.68366
Pericytes	Cnbp	0.0421757	1.68294
Pericytes	Aebp2	0.0425428	1.72642
Pericytes	Ctsb	0.042788	1.63511
Pericytes	Afap1l2	0.0433451	1.34501
Pericytes	Ankrd40	0.0435691	1.61483
Pericytes	Tspan6	0.0437717	1.48708
Pericytes	Zfand3	0.044848	2.17656
Pericytes	Sh2d3c	0.0451371	1.72232
Pericytes	Stim1	0.0456538	2.64101
Pericytes	Fyttd1	0.0459571	2.71211
Pericytes	Tnrc18	0.0462694	2.36797
Pericytes	Rhot1	0.0463304	2.72336
Pericytes	Gpx8	0.0466944	1.7622
Pericytes	Fbxw11	0.0466959	2.54844
Pericytes	Ddx3y	0.0469103	2.32558
Pericytes	Rap2a	0.0472866	1.9557
Pericytes	Cpq	0.0474963	2.36262
Pericytes	Galnt10	0.047884	2.65961
Pericytes	Nipbl	0.0482488	2.4034
Pericytes	Khdrbs1	0.0483103	2.31534
Pericytes	Mapkapk2	0.0484038	2.32684
Pericytes	Farp1	0.0485141	1.27181
Pericytes	Smim14	0.0487867	2.08203
Pericytes	Swt1	0.04879	2.37515
Pericytes	Rhob	0.0491842	1.36054
Pericytes	Prdx5	0.0493143	1.26494
Pericytes	Snrpb2	0.0493533	2.43944
Pericytes	Trip12	0.049451	1.61765
Pericytes	Med10	0.049494	2.37408
Pericytes	Cxxc5	0.049591	1.01387
Pericytes	Ndufs1	0.0497524	2.53303

## Sheet: PanglaoDB cell type analysis
Table S1: PanglaoDB cell type analysis of endothelial and pericyte clusters. All respective cluster markers were used as input genes. p < 0.05.
Cluster	ID	Description	GeneRatio	BgRatio	RichFactor	FoldEnrichment	zScore	pvalue	p.adjust	qvalue	geneID	Count
Endothelial cluster	Endothelial Cells	Endothelial Cells	74/217	246/6654	0.300813	9.22401	24.1316	2.88219e-54	2.88219e-54	4.30811e-52	CLDN5/CDH5/SLC2A1/RAMP2/RASIP1/CD34/EGFL7/SLC7A5/PECAM1/ADGRL4/KDR/PTPRB/COL15A1/PDGFB/FLT1/CD93/STAB1/MMRN2/ADGRF5/AQP1/EMP1/TIE1/CYYR1/USHBP1/PODXL/ROBO4/VWA1/RGCC/VWF/CLEC14A/NOS3/PALMD/HSPG2/ENG/SRGN/DLL4/PRKCH/PLVAP/ID1/ECSCR/THSD1/BCL6B/ICAM2/SOX7/LDB2/SOX18/MFSD2A/FLT4/CAVIN2/ARHGEF15/APLNR/NOTCH4/FLI1/S100A10/FAM167B/SOX17/EMCN/TBX1/FGD5/ECE1/ABCG2/TEK/CALCRL/SCARF1/MEOX1/TMEM100/GPR182/I…	74
Endothelial cluster	Endothelial Cells (Aorta)	Endothelial Cells (Aorta)	33/217	185/6654	0.178378	5.46972	11.32	3.97263e-16	3.97263e-16	2.96902e-14	CDH5/RAMP2/ADGRL4/KDR/STAB1/MMRN2/ADGRF5/AQP1/S100A16/ROBO4/CLEC14A/NOS3/HSPG2/AFAP1L1/SOX18/GIMAP4/PLPP3/ARHGEF15/ITPRID2/LMCD1/SOX17/FGD5/CRACR2B/TEK/CALCRL/ITGA9/PDIA5/PKN3/KLK8/GASK1B/SHE/ATL2/CAV1	33
Endothelial cluster	Hematopoietic Stem Cells	Hematopoietic Stem Cells	27/217	178/6654	0.151685	4.65122	9.06549	1.31759e-11	1.31759e-11	6.56484e-10	CD34/PECAM1/CD93/STAB1/TIE1/ROBO4/LMO2/VWF/CLEC14A/ENG/PLVAP/THSD1/GIMAP4/HLX/ESAM/ITGA6/FLI1/FGD5/MECOM/ABCG2/TEK/SCARF1/PROM1/MYCT1/GIMAP8/CSF2RB/DAB2	27
Endothelial cluster	Mast Cells	Mast Cells	27/217	235/6654	0.114894	3.52305	7.22975	7.91e-09	7.91e-09	2.95584e-07	CDH5/CD34/SLC7A5/ADGRL4/KDR/COL15A1/ADGRF5/AQP1/CYYR1/VWF/CLEC14A/PLVAP/LDB2/PLPP3/APLNR/TEK/CALCRL/ITGA9/CCDC141/ENPP2/MYCT1/HSPA13/GASK1B/RAMP3/CSF2RB/DAB2/ATL2	27
Endothelial cluster	Pericytes	Pericytes	16/217	155/6654	0.103226	3.16527	5.00786	4.02137e-05	4.02137e-05	0.00120218	CDH5/RAMP2/PECAM1/ADGRL4/KDR/COL15A1/ADGRF5/AQP1/ROBO4/CLEC14A/LDB2/VIM/PLPP3/APLNR/TEK/ICAM1	16
Endothelial cluster	Loop Of Henle Cells	Loop Of Henle Cells	15/217	147/6654	0.102041	3.12894	4.79213	8.03922e-05	8.03922e-05	0.00200275	CDH5/ADGRL4/KDR/MMRN2/ADGRF5/AQP1/CYYR1/ROBO4/VWF/CLEC14A/LDB2/PLPP3/APLNR/TEK/CALCRL	15
Endothelial cluster	Stromal Cells	Stromal Cells	11/217	124/6654	0.0887097	2.72016	3.54993	0.00229202	0.00229202	0.0489424	PECAM1/ADGRL4/COL15A1/MMRN2/AQP1/ROBO4/CLEC14A/LDB2/TEK/DAB2/ICAM1	11
Endothelial cluster	Mesangial Cells	Mesangial Cells	12/217	148/6654	0.0810811	2.48624	3.35706	0.00313135	0.00313135	0.0585068	ADGRL4/COL15A1/PDGFB/HMCN1/ROBO4/GJA1/CLEC14A/HSPG2/LDB2/PLPP3/TEK/DAB2	12
Endothelial cluster	Platelets	Platelets	15/217	214/6654	0.0700935	2.14932	3.13762	0.00412206	0.00412206	0.06846	PECAM1/CD93/VWF/SRGN/SCARB1/GIMAP1/CAVIN2/GIMAP4/ESAM/ABCA3/MAPK14/TNFRSF1B/GIMAP8/CSF2RB/DAB2	15
Endothelial cluster	Erythroblasts	Erythroblasts	9/217	124/6654	0.0725806	2.22558	2.52926	0.0196187	0.0196187	0.268517	LMO2/ENG/LMNB1/NMI/PIEZO1/SIPA1/FXYD5/CSF2RB/NRROS	9
Endothelial cluster	Leydig Cells	Leydig Cells	10/217	145/6654	0.0689655	2.11473	2.49169	0.0197606	0.0197606	0.268517	CDH5/ADGRL4/KDR/ADGRF5/AQP1/GJA1/IGFBP3/PLPP3/TEK/ASS1	10
Endothelial cluster	Crypt Cells	Crypt Cells	8/217	110/6654	0.0727273	2.23008	2.38839	0.0267778	0.0267778	0.305462	APLNR/SEMA6A/MCF2L/TRIL/ITGA9/PROM1/TOX3/PPP1R9A	8
Endothelial cluster	Embryonic Stem Cells	Embryonic Stem Cells	11/217	176/6654	0.0625	1.91647	2.26232	0.0285274	0.0285274	0.305462	PECAM1/CTNNB1/PODXL/GJA1/ITGA6/KLF4/ABCG2/PROM1/SMAD2/BNIP3/TAF8	11
Endothelial cluster	Osteoblasts	Osteoblasts	10/217	154/6654	0.0649351	1.99114	2.28474	0.0286102	0.0286102	0.305462	ADGRL4/EMP1/HMCN1/GJA1/IGFBP3/HSPG2/PLPP3/SLC6A6/FOXO1/TEK	10
Endothelial cluster	Sertoli Cells	Sertoli Cells	10/217	158/6654	0.0632911	1.94073	2.1972	0.0333339	0.0333339	0.33217	COL18A1/AQP1/S100A16/VWA1/HSPG2/PRND/PLPP3/OCLN/LAMA5/RXRB	10
Endothelial cluster	Fibroblasts	Fibroblasts	13/217	232/6654	0.0560345	1.71822	2.04438	0.0394902	0.0394902	0.367532	ADGRL4/COL15A1/IGFBP3/CLEC14A/VIM/FLI1/KLF4/TEK/KLF2/CTHRC1/MEOX1/TNFRSF1B/DAB2	13
Endothelial cluster	Peritubular Myoid Cells	Peritubular Myoid Cells	8/217	120/6654	0.0666667	2.04424	2.11933	0.0418003	0.0418003	0.367532	ADGRL4/COL15A1/ADGRF5/AQP1/CLEC14A/HSPG2/PLPP3/TEK	8
Endothelial cluster	Osteoclasts	Osteoclasts	9/217	144/6654	0.0625	1.91647	2.04131	0.0452547	0.0452547	0.375799	SLC2A1/EGFL7/CD93/STAB1/VWF/ENG/PLVAP/AGER/DAB2	9
Pericyte cluster	Pericytes	Pericytes	51/315	155/6654	0.329032	6.95041	16.7087	2.07616e-30	2.07616e-30	2.36026e-28	PDGFRB/CRYAB/RGS5/NDUFA4L2/COL1A2/NOTCH3/PCDH18/CSPG4/POSTN/EDNRA/FSTL1/HIGD1B/HEYL/ZIC1/ASPN/MFGE8/IFITM1/ABCC9/COL4A1/PDE5A/COL3A1/CDH11/INPP4B/DLK1/PRRX1/TAGLN/COX4I2/SLC38A11/CD248/KCNJ8/ATP13A5/RASL12/ANGPT2/VTN/FOXC1/DES/LAMA2/ANPEP/ACTA2/BGN/MCAM/AOC3/TBX18/RARRES2/PDZD2/GNB4/DAAM2/LAMA4/MYO1B/PTH1R/ADGRA2	51
Pericyte cluster	Smooth Muscle Cells	Smooth Muscle Cells	38/315	169/6654	0.224852	4.74973	11.0063	1.95115e-16	1.95115e-16	1.10907e-14	PDGFRB/CRYAB/RGS5/ITGA1/COL1A2/NOTCH3/PCDH18/CALD1/MYL9/POSTN/EDNRA/FSTL1/COL4A1/MYLK/COL3A1/CDH11/GJA4/PRRX1/TAGLN/OGN/SPON2/SLC38A11/RASL12/DES/LAMA2/ACTA2/BGN/AOC3/TPM2/SPEG/VASN/DAAM2/LAMA4/FHL2/LMO7/SSPN/MUSTN1/COL5A1	38
Pericyte cluster	Airway Smooth Muscle Cells	Airway Smooth Muscle Cells	29/315	99/6654	0.292929	6.18778	11.5922	4.73778e-16	4.73778e-16	1.79537e-14	PDGFRB/COL1A2/PCDH18/CALD1/MYL9/POSTN/EDNRA/FSTL1/TBX2/PLAT/COL4A1/PCOLCE/NID1/COL3A1/CDH11/TAGLN/DES/PMP22/ACTA2/BGN/FOXC2/TPM2/LOXL2/LAMA4/PTH1R/SNAI2/MRC2/COL5A1/ADGRA2	29
Pericyte cluster	Adipocyte Progenitor Cells	Adipocyte Progenitor Cells	30/315	115/6654	0.26087	5.51056	10.8762	4.80875e-15	4.80875e-15	1.3667e-13	NOTCH3/PCDH18/CALD1/CSPG4/EDNRA/FSTL1/NR2F2/TBX2/COL4A1/PCOLCE/LAMB1/COL3A1/LAMC1/TCF7L1/PRRX1/FERMT2/FOXC1/UACA/EGFLAM/TBX3/TBX18/KANK2/RND3/SMO/FKBP9/GAS1/ADAMTS15/SNAI2/COL5A1/GPX8	30
Pericyte cluster	Pancreatic Stellate Cells	Pancreatic Stellate Cells	29/315	111/6654	0.261261	5.51883	10.7017	1.3473e-14	1.3473e-14	3.06334e-13	PDGFRB/CRYAB/MGP/RGS5/NDUFA4L2/COL1A2/PCDH18/CALD1/CSPG4/MYL9/POSTN/EDNRA/FSTL1/COL4A1/PCOLCE/COL3A1/CDH11/PRRX1/TAGLN/SPON2/CD248/LAMA2/ACTA2/BGN/LAMA4/OLFML2B/ADAMTS12/SNAI2/COL5A1	29
Pericyte cluster	Pulmonary Vascular Smooth Muscle Cells	Pulmonary Vascular Smooth Muscle Cells	27/315	99/6654	0.272727	5.76104	10.6387	3.62439e-14	3.62439e-14	6.86726e-13	PDGFRB/CRYAB/COL1A2/PCDH18/CALD1/MYL9/POSTN/FSTL1/COL4A1/MYLK/PCOLCE/COL3A1/CDH11/VSTM4/PRRX1/TAGLN/CD248/LAMA2/ACTA2/BGN/ZCCHC24/DAAM2/LAMA4/ADAMTS12/COL5A1/CPED1/ADGRA2	27
Pericyte cluster	Mesangial Cells	Mesangial Cells	32/315	148/6654	0.216216	4.56731	9.78292	1.75231e-13	1.75231e-13	2.49555e-12	PDGFRB/SERPINE2/CRYAB/COL1A2/PCDH18/CALD1/MYL9/POSTN/EDNRA/FSTL1/COL4A1/MYLK/COL3A1/CDH11/PRRX1/TAGLN/ANGPT2/LAMA2/ACTA2/BGN/FILIP1L/TBX18/TPM2/CSTB/MAP3K20/AKAP12/ACTN1/FLNA/LAMA4/PML/COL5A1/PDE3A	32
Pericyte cluster	Satellite Cells	Satellite Cells	31/315	139/6654	0.223022	4.71107	9.85604	1.75613e-13	1.75613e-13	2.49555e-12	NOTCH3/CSPG4/EDNRA/FSTL1/EPB41L1/ARHGEF17/NR2F2/HEYL/TBX2/COL4A1/NUAK1/DMD/LAMB1/COL3A1/LAMC1/FERMT2/ITGA7/UACA/NES/RND3/HSPA12A/FKBP9/CAP2/ADAMTS15/KCNS3/SNAI2/RUNX1/NCAM1/ADCY6/SPRY1/DAG1	31
Pericyte cluster	Vascular Smooth Muscle Cells	Vascular Smooth Muscle Cells	26/315	103/6654	0.252427	5.33222	9.8771	8.05032e-13	8.05032e-13	1.01688e-11	PDGFRB/CRYAB/COL1A2/PCDH18/CALD1/POSTN/EDNRA/FSTL1/ASPN/COL4A1/MYLK/COL3A1/CDH11/VSTM4/PRRX1/KCNJ8/LAMA2/ACTA2/RBMS3/BGN/TBX18/CACNA2D1/DAAM2/LAMA4/COL5A1/ADGRA2	26
Pericyte cluster	Myofibroblasts	Myofibroblasts	25/315	100/6654	0.25	5.28095	9.61481	2.86124e-12	2.86124e-12	3.25278e-11	PDGFRB/CRYAB/COL1A2/PCDH18/CALD1/MYL9/POSTN/EDNRA/FSTL1/LRP1/COL4A1/MYLK/COL3A1/CDH11/PRRX1/TAGLN/RASL12/DES/LAMA2/ACTA2/BGN/TPM2/DAAM2/LAMA4/COL5A1	25
Pericyte cluster	Peritubular Myoid Cells	Peritubular Myoid Cells	27/315	120/6654	0.225	4.75286	9.24734	5.56237e-12	5.56237e-12	5.74867e-11	PDGFRB/CRYAB/MGP/COL1A2/CALD1/MYL9/POSTN/EDNRA/FSTL1/ASPN/COL4A1/MYLK/COL3A1/CDH11/PRRX1/TAGLN/RASL12/UACA/LAMA2/PMP22/ACTA2/BGN/TPM2/RARRES2/FKBP9/LAMA4/INTS6	27
Pericyte cluster	Fibroblasts	Fibroblasts	38/315	232/6654	0.163793	3.45993	8.50131	8.35634e-12	8.35634e-12	7.91653e-11	PDGFRB/MGP/COL1A2/PCDH18/MYL9/POSTN/EDNRA/FSTL1/ASPN/COL4A1/LAMB1/COL3A1/LAMC1/CDH11/PRRX1/TAGLN/SPON2/PKD2/CD248/IL34/VTN/ZEB2/UCP2/LAMA2/ACTA2/BGN/TBX18/RARRES2/HIF1A/KLF9/SNHG18/LAMA4/OLFML2B/IL1R1/RUNX1/COL5A1/EGR1/CKAP4	38
Pericyte cluster	Hepatic Stellate Cells	Hepatic Stellate Cells	28/315	132/6654	0.212121	4.48081	9.00389	1.0167e-11	1.0167e-11	8.89097e-11	PDGFRB/CRYAB/RGS5/COL1A2/MEG3/PCDH18/CALD1/MYL9/POSTN/EDNRA/FSTL1/COL4A1/COL3A1/CDH11/PRRX1/TAGLN/KCNJ8/RASL12/DES/VCL/LAMA2/ACTA2/BGN/TPM2/LAMA4/ADAMTS12/SNAI2/COL5A1	28
Pericyte cluster	Cardiac Stem And Precursor Cells	Cardiac Stem And Precursor Cells	25/315	113/6654	0.221239	4.67341	8.7789	5.21624e-11	5.21624e-11	4.23574e-10	EDNRA/FSTL1/NR2F2/COL4A1/NUAK1/LAMB1/LAMC1/FAT1/FERMT2/UACA/TSPAN12/NES/TBX3/PTPRF/TBX18/CACNA2D1/RND3/FKBP9/MYO1B/CAP2/ADAMTS15/SNAI2/ADCY6/TSPAN6/GPX8	25
Pericyte cluster	Meningeal Cells	Meningeal Cells	25/315	115/6654	0.217391	4.59213	8.66162	7.83009e-11	7.83009e-11	5.93438e-10	CRYAB/COL1A2/PCDH18/CALD1/POSTN/EDNRA/FSTL1/ZIC1/COL4A1/LAMB1/COL3A1/CDH11/PRRX1/FERMT2/KCNJ8/RASL12/VTN/FOXC1/BGN/NES/FOXC2/CACNA2D1/LAMA4/PTH1R/NNAT	25
Pericyte cluster	Podocytes	Podocytes	32/315	184/6654	0.173913	3.67371	8.19831	8.43716e-11	8.43716e-11	5.99482e-10	CALD1/AJUBA/EDNRA/FSTL1/EPB41L1/ARHGEF17/NR2F2/COL4A1/NUAK1/LAMB1/LAMC1/FAT1/ITGB5/FERMT2/ENPEP/FOXC1/PLCE1/UACA/DES/ARHGAP24/PTPRF/FOXC2/CDC42BPA/CDKN1C/RND3/HSPA12A/LOXL2/FKBP9/MYO1B/PTH1R/CAP2/ADCY6	32
Pericyte cluster	Myoblasts	Myoblasts	26/315	126/6654	0.206349	4.35888	8.48484	1.11105e-10	1.11105e-10	7.42991e-10	CRYAB/COL1A2/CALD1/CSPG4/POSTN/EDNRA/FSTL1/COL4A1/LAMB1/COL3A1/PRRX1/FERMT2/ANGPT2/UACA/DES/BGN/NES/TBX3/TPM2/CACNA2D1/RND3/FKBP9/ADAMTS12/CAP2/SNAI2/COL5A1	26
Pericyte cluster	Chondrocytes	Chondrocytes	28/315	146/6654	0.191781	4.05114	8.30938	1.28414e-10	1.28414e-10	8.11036e-10	PDGFRB/CRYAB/MGP/COL1A2/PCDH18/CALD1/CSPG4/POSTN/EDNRA/FSTL1/LRP1/COL4A1/NID1/COL3A1/CDH11/DLK1/PRRX1/TAGLN/LAMA2/BGN/SMO/DAAM2/LAMA4/OLFML2B/ADAMTS12/GAS1/SNAI2/COL5A1	28
Pericyte cluster	Granulosa Cells	Granulosa Cells	24/315	112/6654	0.214286	4.52653	8.38987	2.61503e-10	2.61503e-10	1.56467e-09	CSPG4/AJUBA/FSTL1/ARHGEF17/NR2F2/COL4A1/NUAK1/LAMB1/LAMC1/FAT1/FERMT2/MCAM/NES/PTPRF/RND3/MTCL1/NLGN2/FKBP9/CAP2/ADAMTS15/SNAI2/ADCY6/DAG1/GPX8	24
Pericyte cluster	Stromal Cells	Stromal Cells	25/315	124/6654	0.201613	4.25883	8.16526	4.34859e-10	4.34859e-10	2.47183e-09	PDGFRB/COL1A2/PCDH18/MYL9/POSTN/EDNRA/FSTL1/CFH/COL4A1/COL3A1/CDH11/PRRX1/TAGLN/CD248/ITGAV/DES/LAMA2/ACTA2/BGN/BMP5/ITGA4/LAMA4/OLFML2B/COL5A1/ADGRA2	25
Pericyte cluster	Juxtaglomerular Cells	Juxtaglomerular Cells	22/315	103/6654	0.213592	4.51188	8.00679	1.59884e-09	1.59884e-09	8.65536e-09	PDGFRB/CRYAB/MGP/COL1A2/CALD1/MYL9/POSTN/EDNRA/ASPN/COL4A1/MYLK/COL3A1/CDH11/TAGLN/CD248/RASL12/DES/LAMA2/ANO1/ACTA2/BGN/RARRES2	22
Pericyte cluster	Osteoblasts	Osteoblasts	26/315	154/6654	0.168831	3.56636	7.18248	1.04324e-08	1.04324e-08	5.39089e-08	PDGFRB/F2R/COL1A2/PCDH18/CALD1/MYL9/POSTN/EDNRA/FSTL1/LRP1/COL4A1/COL3A1/CDH11/PRRX1/TAGLN/LAMA2/ACTA2/BGN/HIF1A/OLFML2B/ADAMTS12/PTH1R/OSMR/SNAI2/MRC2/COL5A1	26
Pericyte cluster	Loop Of Henle Cells	Loop Of Henle Cells	24/315	147/6654	0.163265	3.44879	6.69226	7.66896e-08	7.66896e-08	3.79061e-07	CRYAB/RGS5/COL1A2/CALD1/MYL9/POSTN/EDNRA/FSTL1/LRP1/COL4A1/COL3A1/CDH11/GJA4/WLS/COX4I2/CDH6/RASL12/LAMA2/ANO1/BGN/CDKN1C/HEY2/THBS1/SSPN	24
Pericyte cluster	Osteocytes	Osteocytes	19/315	98/6654	0.193878	4.09543	6.88127	1.12392e-07	1.12392e-07	5.32384e-07	NOTCH3/PCDH18/CALD1/EDNRA/FSTL1/PLAT/COL4A1/CDH11/TCF7L1/AXL/FERMT2/NES/TCEAL9/RND3/ADAMTS12/ADAMTS15/SNAI2/STC1/GPX8	19
Pericyte cluster	Melanocytes	Melanocytes	22/315	133/6654	0.165414	3.49416	6.4766	2.15033e-07	2.15033e-07	9.77832e-07	CRYAB/CALD1/CSPG4/POSTN/FSTL1/PLAT/COL4A1/LAMB1/LAMC1/PRRX1/HSPB1/UACA/ITGAV/PMP22/FILIP1L/RND3/LOXL2/FKBP9/LAMA4/OSMR/PPARD/SNAI2	22
Pericyte cluster	Glomus Cells	Glomus Cells	21/315	127/6654	0.165354	3.49291	6.32275	4.11747e-07	4.11747e-07	1.80035e-06	CRYAB/NDUFA4L2/CALD1/EDNRA/EPB41L1/ARHGEF17/COL4A1/NUAK1/GFRA2/COX4I2/FERMT2/KCNJ8/ARHGEF25/BGN/NES/CACNA2D1/HSPA12A/PTH1R/CAP2/ADCY5/IL1R1	21
Pericyte cluster	His Bundle Cells	His Bundle Cells	17/315	98/6654	0.173469	3.66433	5.92292	2.71374e-06	2.71374e-06	1.14263e-05	PCDH18/CALD1/EDNRA/FSTL1/COL4A1/LAMB1/CDH11/FERMT2/RBMS3/MCAM/NES/BMPR1A/CACNA2D1/AKAP12/LAMA4/TACC2/FARP1	17
Pericyte cluster	Endothelial Cells (Blood Brain Barrier)	Endothelial Cells (Blood Brain Barrier)	18/315	113/6654	0.159292	3.36485	5.65165	4.89456e-06	4.89456e-06	1.98726e-05	EPB41L1/ARHGEF17/NUAK1/FAT1/AGAP1/SLC19A1/STXBP1/PTPRF/APP/MTCL1/HSPA12A/NLGN2/TNFRSF21/DDR1/CAP2/PPARD/KAZN/FARP1	18
Pericyte cluster	Mesothelial Cells	Mesothelial Cells	20/315	144/6654	0.138889	2.93386	5.22962	1.2475e-05	1.2475e-05	4.89037e-05	CRYAB/COL1A2/POSTN/EDNRA/FSTL1/COL4A1/COL3A1/CDH11/UACA/DES/ANO1/BGN/RARRES2/COBLL1/RND3/RASL11A/FKBP9/OSMR/SNAI2/LURAP1L	20
Pericyte cluster	Endothelial Cells (Aorta)	Endothelial Cells (Aorta)	23/315	185/6654	0.124324	2.6262	5.0003	1.80452e-05	1.80452e-05	6.83817e-05	COL1A2/CALD1/MYL9/POSTN/EDNRA/FSTL1/COL4A1/COL3A1/ITGB5/UACA/PMP22/BGN/FOXC2/P3H3/FKBP9/LAMA4/CHST12/HEY2/COL5A1/EHD3/PDE3A/MARVELD1/CPQ	23
Pericyte cluster	Transient Cells	Transient Cells	17/315	120/6654	0.141667	2.99254	4.90978	4.3574e-05	4.3574e-05	0.000159796	PARM1/EPB41L1/ARHGEF17/AGRN/CDC42EP4/TNKS1BP1/ITGAV/CHPF/PTPRF/GPRC5C/PLXNB2/FKBP9/TMEM50B/DDR1/WASL/ADCY6/DAG1	17
Pericyte cluster	Peri-islet Schwann Cells	Peri-islet Schwann Cells	16/315	114/6654	0.140351	2.96475	4.71654	8.19801e-05	8.19801e-05	0.000291245	PCDH18/EDNRA/EPB41L1/COL4A1/NUAK1/CDH11/FAT1/AGAP1/GFRA2/FERMT2/NES/CACNA2D1/HSPA12A/CAP2/ADCY6/FARP1	16
Pericyte cluster	Adipocytes	Adipocytes	23/315	210/6654	0.109524	2.31356	4.31157	0.000134304	0.000134304	0.000462675	PDGFRB/CRYAB/COL1A2/MYL9/POSTN/LRP1/CFH/ASPN/COL3A1/TAGLN/LAMA2/CPPED1/CYTH3/ACTA2/BGN/AOC3/RARRES2/RNASE4/OLFML2B/H6PD/ACSL1/IL1R1/TRIP10	23
Pericyte cluster	Embryonic Stem Cells	Embryonic Stem Cells	20/315	176/6654	0.113636	2.40043	4.19712	0.000224331	0.000224331	0.000750084	AJUBA/FSTL1/ARHGAP42/ZIC1/COL4A1/LAMB1/LAMC1/FAT1/FERMT2/UACA/SMAD4/NES/PTPRF/RND3/ITGA4/MYO1B/PML/LMNA/TSPAN6/GPX8	20
Pericyte cluster	Luteal Cells	Luteal Cells	16/315	125/6654	0.128	2.70385	4.28663	0.000246754	0.000246754	0.000801488	EPB41L1/ARHGEF17/ITGB5/FERMT2/CDC42EP4/TNKS1BP1/TSPAN12/CHPF/PTPRF/RND3/FKBP9/MYO1B/RORA/CAP2/ADCY6/DAG1	16
Pericyte cluster	Cardiomyocytes	Cardiomyocytes	19/315	174/6654	0.109195	2.30662	3.89306	0.00053349	0.00053349	0.00168471	CRYAB/EDNRA/ATP1A2/DMD/ART3/ITGA7/RASL12/PYGM/DES/LAMA2/PDE4D/SPEG/BDNF/FHL2/PTH1R/HEY2/CAP2/MYOM1/STC1	19
Pericyte cluster	Endothelial Cells	Endothelial Cells	24/315	246/6654	0.097561	2.06086	3.77936	0.000556609	0.000556609	0.00171021	PDGFRB/MGP/RGS5/COL1A2/POSTN/CFH/COL4A1/MYLK/COL3A1/GJA4/COX4I2/GGT5/KCNJ8/RASL12/IFI27/BGN/MCAM/CDKN1C/MGLL/APOLD1/LAMA4/FHL2/BDP1/EHD3	24
Pericyte cluster	Myocytes	Myocytes	18/315	163/6654	0.110429	2.33269	3.83991	0.000650881	0.000650881	0.00194723	CRYAB/NOTCH3/EDNRA/COL4A1/DMD/LAMB1/NID1/COL3A1/PRRX1/NBR1/ITGA7/RASL12/PYGM/DES/LAMA2/TPM2/SPEG/FHL2	18
Pericyte cluster	Sertoli Cells	Sertoli Cells	17/315	158/6654	0.107595	2.27281	3.60931	0.0012253	0.0012253	0.00357172	CRYAB/LRP1/ARHGEF17/ITGB5/CDC42EP4/RASL12/DES/BGN/TBX3/GPRC5C/RARRES2/VASN/FKBP9/PTH1R/LURAP1L/ADCY6/STIM1	17
Pericyte cluster	Kidney Progenitor Cells	Kidney Progenitor Cells	13/315	105/6654	0.12381	2.61533	3.71896	0.00127564	0.00127564	0.00359599	EPB41L1/NR2F2/FAT1/FERMT2/FOXC1/NES/CACNA2D1/GTF2IRD1/HSPA12A/SMO/CAP2/ADAMTS15/GPX8	13
Pericyte cluster	Leydig Cells	Leydig Cells	16/315	145/6654	0.110345	2.3309	3.61183	0.00129689	0.00129689	0.00359599	CRYAB/COL1A2/CALD1/POSTN/EDNRA/COL4A1/COL3A1/CDH11/DLK1/RASL12/LAMA2/ANO1/BGN/RARRES2/FKBP9/TACC2	16
Pericyte cluster	M√ºller Cells	M√ºller Cells	16/315	147/6654	0.108844	2.29919	3.55054	0.0015001	0.0015001	0.00406041	CRYAB/COL1A2/PCDH18/POSTN/FSTL1/ATP1A2/COL4A1/COL3A1/CDH11/PRRX1/RASL12/RGS7BP/BGN/NES/CACNA2D1/COL5A1	16
Pericyte cluster	Myoepithelial Cells	Myoepithelial Cells	13/315	115/6654	0.113043	2.38791	3.34663	0.00292002	0.00292002	0.00772	MYL9/POSTN/COL4A1/MYLK/ANO1/ACTA2/RND3/FKBP9/SMIM3/FHL2/OSMR/SNAI2/GPX8	13
Pericyte cluster	Osteoclasts	Osteoclasts	15/315	144/6654	0.104167	2.2004	3.24615	0.00321266	0.00321266	0.00830065	LRP1/ITGB5/PID1/FCGRT/ITGAV/SMAD4/ANPEP/CTSD/THRA/HIF1A/CTSZ/OLFML2B/PTH1R/IL1R1/CTSB	15
Pericyte cluster	Schwann Cells	Schwann Cells	14/315	138/6654	0.101449	2.143	3.02445	0.00551704	0.00551704	0.0139378	CRYAB/EPB41L1/ATP1A2/LAMC1/TAGLN/ART3/ITGA7/RASL12/PMP22/ZCCHC24/HSPA12A/DAAM2/ADCY5/CLIP3	14
Pericyte cluster	Choroid Plexus Cells	Choroid Plexus Cells	12/315	117/6654	0.102564	2.16654	2.83765	0.00906048	0.00906048	0.022392	NOTCH3/EPB41L1/ARHGEF17/AGAP1/CDC42EP4/SDC2/PTPRF/RARRES2/DDR1/ADCY5/ADCY6/FARP1	12
Pericyte cluster	Tanycytes	Tanycytes	12/315	121/6654	0.0991736	2.09492	2.7094	0.011699	0.011699	0.0282978	CRYAB/PCDH18/EDNRA/FSTL1/CDH11/MARK1/RASL12/RGS7BP/NES/CACNA2D1/CCDC3/ADCY5	12
Pericyte cluster	Pulmonary Alveolar Type I Cells	Pulmonary Alveolar Type I Cells	12/315	131/6654	0.0916031	1.93501	2.40924	0.0208748	0.0208748	0.0494402	NOTCH3/EDNRA/EPB41L1/TNKS1BP1/ANO1/PTPRF/RND3/FKBP9/DDR1/TACC2/OSMR/ADCY6	12
Pericyte cluster	Mast Cells	Mast Cells	18/315	235/6654	0.0765957	1.61799	2.15	0.0292381	0.0292381	0.067835	PDGFRB/COL1A2/POSTN/EDNRA/LRP1/CFH/MFGE8/TCF7L1/GJA4/PID1/RASL12/LAMA2/CDC42BPA/OLFML2B/IL1R1/VWA5A/SSPN/ARMCX3	18
