# Supplementary material for: GPR124 regulates hyaloid blood vessel regression and is associated with endothelial-mesenchymal transition
Source: Sci Rep. 2026 Apr 29;16:13765. doi: 10.1038/s41598-026-50835-1 (PMC13128929; doi:10.1038/s41598-026-50835-1)
Supplement: Supplementary file 3 — Supplementary Information 3. [file 41598_2026_50835_MOESM3_ESM.xlsx]

## Sheet: Expressed genes EC
Table S2: Genes expressed in P6 hyaloid endothelial cells. Mean log-normalized RNA expression (UMI counts) from all cells or split by genotype. P, postnatal day; UMI, unique molecular identifier.
	Mean log-normalized UMI counts
Gene	All	Gpr124 fl/fl	Gpr124 ΔEC/ΔEC
mt-Atp6	4.34177	4.34352	4.34031
Sparc	4.13144	4.22625	4.05243
mt-Co2	3.89935	4.16488	3.67808
Igfbp7	3.86784	3.58224	4.10583
mt-Nd4	3.85611	3.85301	3.8587
mt-Co1	3.81785	3.98835	3.67577
mt-Nd1	3.75688	3.79626	3.72406
mt-Cytb	3.75306	3.92008	3.61389
Eef1a1	3.74468	4.0294	3.50741
mt-Co3	3.6829	3.7945	3.58991
Tmsb4x	3.4978	3.64127	3.37824
Tpt1	3.45791	3.52695	3.40038
mt-Nd2	3.32198	3.24972	3.38219
Calm1	3.27424	2.84319	3.63344
Rpl23	3.23387	3.30134	3.17763
Col4a2	3.23033	2.88252	3.52018
Rpl4	3.21835	3.29932	3.15087
Ptma	3.19395	3.28055	3.12179
Rpl18a	3.16726	2.95685	3.34259
Rps8	3.1661	3.12947	3.19661
Cldn5	3.15609	3.31964	3.01979
Slc2a1	3.14403	2.65299	3.55322
Cfl1	3.13229	3.35283	2.94851
Rps20	3.13	3.23961	3.03866
Cd93	3.10604	2.72197	3.4261
Malat1	3.09113	2.89847	3.25168
Rps24	3.08622	2.97361	3.18007
Rps9	3.05557	3.27751	2.87061
Actb	3.05066	3.63657	2.5624
Col4a1	3.00403	2.36844	3.53369
Rps16	2.98696	2.94846	3.01904
mt-Nd3	2.9571	2.74819	3.13118
Gnas	2.9396	3.41129	2.54652
Rps14	2.92757	3.11099	2.77472
Actg1	2.90488	3.03908	2.79304
Rpl13	2.88581	2.69924	3.04129
Rps12	2.88299	3.00444	2.78179
Rpsa	2.87704	3.03879	2.74225
Rpl17	2.86425	2.65661	3.03728
Rpl38	2.84133	2.9796	2.72611
Tmsb10	2.8246	3.62042	2.16142
Rplp1	2.8084	2.64285	2.94635
Ppia	2.78373	3.1643	2.46658
Rps28	2.76786	3.004	2.57107
Rps29	2.75531	3.28913	2.31046
Rps26	2.74429	2.58685	2.8755
Rps15a	2.73203	3.08646	2.43666
Vim	2.72892	2.91965	2.56998
Tsc22d1	2.71776	2.77711	2.6683
Rps7	2.71645	2.74519	2.69249
Myl6	2.71584	2.83063	2.62018
Rps11	2.70752	2.88776	2.55732
Rplp0	2.70397	2.84959	2.58262
Rpl32	2.69647	3.15535	2.31407
Rpl31	2.69407	2.45532	2.89303
Col18a1	2.69041	2.19115	3.10646
Rps21	2.67308	3.00215	2.39885
Rpl23a	2.67076	2.87364	2.50169
Rpl15	2.65721	3.01051	2.36279
Fau	2.65521	2.89992	2.45128
Rpl37	2.65225	2.29611	2.94904
Gm42418	2.64986	2.19012	3.03297
Ctnnb1	2.64453	2.279	2.94914
Rpl5	2.63934	2.71079	2.5798
Cdh5	2.63668	2.18308	3.01469
Tcf4	2.62799	2.12383	3.04811
Sptbn1	2.62208	2.56314	2.67121
Rps4x	2.62152	2.92749	2.36654
Rps15	2.61522	2.69465	2.54903
mt-Atp8	2.59992	2.59543	2.60366
Rpl27a	2.56368	2.44182	2.66523
Flt1	2.54248	1.85091	3.11879
Rpl37a	2.53117	2.43577	2.61067
Rps19	2.53063	2.64112	2.43856
Rps3	2.51237	2.97238	2.12903
Rps6	2.50638	2.32341	2.65886
Rpl41	2.50603	3.10244	2.00903
Rpl13a	2.48643	3.08029	1.99154
Rpl28	2.47783	2.88047	2.14231
Rpl19	2.46172	2.5989	2.34741
Rpl26	2.45935	2.47365	2.44743
Itm2b	2.45536	2.49127	2.42543
Rpl30	2.44941	2.29508	2.57802
Rps10	2.42806	2.43489	2.42238
Gnai2	2.42398	2.71388	2.1824
Rpl6	2.39764	2.90451	1.97524
Rpl24	2.38566	2.19037	2.5484
Pfn1	2.37627	2.42849	2.33275
H3f3a	2.36347	2.49778	2.25155
Rpl34	2.36155	2.43492	2.30042
Rps23	2.36043	2.89955	1.91115
Rps3a1	2.34633	2.69746	2.05371
mt-Nd5	2.34368	2.41562	2.28374
Ywhab	2.33506	2.2396	2.41462
Rpl22	2.32848	2.82158	1.91757
Rpl39	2.3052	2.53715	2.11191
Hsp90ab1	2.3001	2.93178	1.77371
Hspa8	2.29322	2.31551	2.27466
Rps17	2.29296	2.68517	1.96611
Rpl12	2.28702	2.4782	2.12769
Rpl9-ps6	2.28582	2.63191	1.9974
Rpl27	2.25351	1.99973	2.46499
Egfl7	2.25091	2.69683	1.8793
Nedd4	2.24505	2.21332	2.2715
Ramp2	2.22425	2.3486	2.12063
Slc7a5	2.21217	1.70414	2.63552
Pabpc1	2.21131	2.63489	1.85833
Rpl11	2.17952	2.8779	1.59753
Rps2	2.17263	2.82482	1.62913
Eef2	2.15447	2.17443	2.13783
Marcks	2.15152	2.36094	1.97701
Epas1	2.14893	1.26723	2.88368
Tpm4	2.13864	2.22964	2.0628
Rps27a	2.1224	2.88109	1.49017
Rpl35a	2.1206	2.80171	1.553
Rpl3	2.11865	2.58397	1.73088
Slc3a2	2.11857	2.05499	2.17155
Rpl18	2.11473	2.5052	1.78933
Rpl21	2.09362	2.14963	2.04694
Crip2	2.08157	2.15871	2.01728
Rps5	2.06687	2.49384	1.71106
Rps13	2.0553	2.32143	1.83352
Sparcl1	2.05146	1.19528	2.76495
Rpl7a	2.04634	2.23817	1.88649
Rack1	2.0247	2.20761	1.87228
Hnrnpa2b1	2.01674	2.01245	2.02032
Tubb5	2.003	1.857	2.12467
Ubb	1.99606	2.80447	1.32238
Pkm	1.99381	2.14533	1.86754
Aqp1	1.98778	1.72015	2.21081
Rpl7	1.9794	2.54386	1.50902
Rps18	1.97538	2.1828	1.80254
Rpl10a	1.96706	2.26022	1.72276
Actn4	1.96666	1.79903	2.10635
Eng	1.96419	1.96395	1.96439
Slc38a2	1.96401	1.7331	2.15643
Ifitm3	1.94831	1.95915	1.93926
B2m	1.94355	1.5527	2.26925
Ptms	1.94125	2.39621	1.56211
Nid1	1.93971	1.75253	2.0957
Purb	1.93223	1.54198	2.25744
Rpl8	1.92942	2.18324	1.71791
Col15a1	1.92805	1.31143	2.4419
Heg1	1.92114	1.42174	2.33731
Msn	1.91894	1.51878	2.25241
Rplp2	1.89884	2.15653	1.6841
Rps25	1.88067	1.89052	1.87246
Slc6a6	1.87733	1.37963	2.29209
Atp5g3	1.87733	1.93066	1.83288
Ctla2a	1.86279	1.46964	2.19041
Six3os1	1.84994	1.31071	2.29929
Hnrnpk	1.84893	1.61263	2.04584
Marcksl1	1.84513	2.35106	1.42352
Sod1	1.84164	1.73403	1.93131
Myh9	1.8299	2.17314	1.54386
Rpl36a	1.82408	1.63254	1.98369
Esam	1.82248	2.27764	1.44318
H3f3b	1.82007	1.89324	1.75908
Tie1	1.80328	2.09268	1.56211
Sat1	1.79464	1.07096	2.39771
Cdc42	1.79453	1.69594	1.87668
Rps27rt	1.79412	1.6006	1.95539
Cd34	1.78543	1.65256	1.89615
Six3	1.77783	1.2453	2.2216
Pdgfb	1.77276	1.33097	2.14092
Adgrf5	1.76941	1.32977	2.13578
Eif1	1.7505	1.57935	1.89313
Foxp1	1.72908	1.23144	2.14378
Fkbp1a	1.72905	2.47672	1.106
Qk	1.72398	1.96836	1.52033
Cox7c	1.71863	2.13061	1.3753
Rpl14	1.71736	2.51296	1.05435
Eef1g	1.71057	1.05896	2.25357
Cd81	1.70569	1.33194	2.01714
Hdac7	1.69971	1.52959	1.84147
Kdr	1.6962	1.20764	2.10333
Laptm4a	1.69173	2.02265	1.41597
S100a11	1.68998	1.68634	1.69301
Emp1	1.68065	1.72484	1.64383
Tnfaip1	1.67726	1.16217	2.1065
Ubc	1.6726	2.02101	1.38225
Serpinh1	1.67134	1.81899	1.5483
Fstl1	1.67104	1.33194	1.95362
Ybx1	1.67039	1.94924	1.43801
Nme2	1.66657	1.84679	1.5164
Rpl9	1.65636	1.6533	1.65891
Itgb1	1.65605	1.46177	1.81795
Ptprb	1.65154	1.18981	2.03632
Tjp1	1.65025	1.85623	1.4786
Anxa2	1.64442	2.09403	1.26975
Id3	1.63589	1.40057	1.832
Naca	1.63571	1.98594	1.34385
Tm4sf1	1.62404	0.959646	2.1777
Ctnna1	1.61849	1.66949	1.57599
Uba52	1.61722	1.83659	1.43442
Ddx5	1.61658	1.68897	1.55626
Atp5b	1.61518	2.03299	1.267
Dynll1	1.59125	1.60968	1.5759
Spock2	1.57856	1.35805	1.76232
Cavin3	1.57797	2.01751	1.21168
Rasip1	1.56929	1.87308	1.31612
Rpl36	1.56878	1.71328	1.44837
Abhd2	1.56389	1.79524	1.37109
Pecam1	1.55722	1.19868	1.856
App	1.55437	1.35879	1.71734
Ets1	1.55423	1.31121	1.75675
Ddx39b	1.5531	1.89282	1.27
Bmpr2	1.55082	1.34479	1.72252
Fscn1	1.55014	2.02251	1.15649
Rhoa	1.54231	1.78521	1.33989
Id1	1.53473	1.02371	1.96059
Emcn	1.53325	1.22387	1.79107
Set	1.53218	1.37179	1.66584
Csnk1a1	1.52924	1.32069	1.70303
Rpl29	1.51749	1.58102	1.46454
Cst3	1.51601	1.87584	1.21615
Pcbp1	1.51536	1.6919	1.36825
Wdr89	1.51418	1.74854	1.31887
Atp5l	1.5132	1.73707	1.32664
Mmrn2	1.5053	0.292223	2.5162
Rac1	1.49322	1.51332	1.47647
Myl12a	1.49196	1.9454	1.11409
Zmiz1	1.47884	1.05858	1.82907
Btf3	1.47299	2.12518	0.929504
Rbms1	1.46906	1.91187	1.10005
Eef1b2	1.46687	1.20229	1.68736
Tspan13	1.46685	1.02791	1.83263
Tuba1b	1.46408	1.72491	1.24672
Gja1	1.46202	1.2013	1.67927
Cd200	1.45766	1.60186	1.3375
Hba-a2	1.4576	2.80403	0.335572
Eif4h	1.45315	0.992997	1.83662
Hmgb1	1.45287	1.69308	1.2527
Cox8a	1.45106	0.67431	2.09836
Npm1	1.44916	2.19039	0.831466
Tmbim6	1.44636	1.68982	1.24348
Atxn7l3b	1.44613	0.780176	2.00109
Ppib	1.43981	1.90566	1.0516
Sdcbp	1.43894	1.11692	1.70729
Prcp	1.4385	1.85937	1.08778
Nap1l1	1.43787	1.83648	1.10569
Tvp23b	1.43298	1.75474	1.16485
Vcp	1.43251	1.20469	1.62235
Rpl10-ps3	1.43127	1.63532	1.26122
Hnrnpab	1.42683	1.54198	1.33087
Sipa1	1.42681	1.82903	1.09163
Hes1	1.422	1.10522	1.68598
Eogt	1.42078	1.05006	1.72972
Ywhae	1.42011	1.33834	1.48824
Gng11	1.41946	1.42638	1.4137
Gnb1	1.4178	1.56684	1.29361
Tril	1.41644	1.18637	1.60817
Adgrl4	1.41533	1.43935	1.3953
Cox4i1	1.41317	2.05714	0.876529
Eif4g2	1.41208	1.79274	1.09486
Sf1	1.40792	1.43082	1.38883
Actc1	1.40648	1.52676	1.30625
Eif2s2	1.403	1.50647	1.31678
Rtl8a	1.40204	1.10575	1.64894
Serinc3	1.39321	1.23708	1.52332
Dock6	1.38954	0.792977	1.88668
Hnrnpa1	1.38914	1.66841	1.15641
S100a16	1.38691	1.57935	1.22653
Hnrnpu	1.38516	1.22776	1.51633
Gnb2	1.37914	0.932644	1.75122
Mfng	1.37867	1.19726	1.52985
Kif5b	1.37537	1.61365	1.17681
Eif5a	1.37359	1.66385	1.1317
Tmem59	1.37296	1.33834	1.4018
Igfbp4	1.3677	1.45449	1.29538
Nfib	1.35638	1.14406	1.5333
Pakap.1	1.35332	1.79429	0.98584
Anxa3	1.3518	0.788341	1.82135
Rbpms	1.35138	1.75241	1.01719
Unc5b	1.34912	0.879017	1.74088
Selenow	1.34233	1.38146	1.30971
Rbm39	1.34098	1.40057	1.29132
Stab1	1.34073	1.32462	1.35416
Marc2	1.3402	1.0419	1.58879
Arhgap31	1.34005	1.65089	1.08102
Ccnd2	1.33974	1.70733	1.03341
Itga6	1.33507	1.44809	1.24088
Ldha	1.3295	1.76499	0.96659
Abcg2	1.32175	1.82342	0.903695
U2af2	1.31957	1.66285	1.03351
Slc25a3	1.3172	1.54888	1.12414
Rtraf	1.30792	1.32811	1.29109
Hba-a1	1.30562	2.49489	0.314559
Ptp4a2	1.30381	1.24338	1.35416
Prkar1a	1.29985	1.45287	1.17233
Capns1	1.29882	0.667424	1.82498
Vapa	1.2985	1.3962	1.21708
Gapdh	1.29164	1.56872	1.06074
Kmt2e	1.28572	1.05562	1.47747
Rab11a	1.28213	0.951076	1.55802
Sh3bgrl3	1.28078	1.41962	1.16509
Nfkbia	1.27778	0.769415	1.70142
Eif3a	1.2773	1.42884	1.15102
Csde1	1.27644	0.741716	1.72204
Reep3	1.27572	1.81383	0.827292
Vasp	1.27205	1.11356	1.40412
Lcp1	1.26758	0.520225	1.89037
Plxnd1	1.26557	1.24558	1.28224
Atp5h	1.26354	1.11028	1.39125
Rgs5	1.26196	1.62044	0.963232
Lrrc58	1.25986	1.74663	0.854214
Atp5g2	1.25949	1.41076	1.13343
Bnip3l	1.25629	0.812996	1.62571
Sec61g	1.25604	1.02469	1.44883
Pcbp2	1.25269	1.2949	1.21752
Ecscr	1.2521	1.34173	1.1774
Gng5	1.24722	1.108	1.36325
Tspan18	1.24567	1.5022	1.0319
Txn1	1.24325	1.79448	0.783891
Fth1	1.23622	1.54498	0.978927
Zfp36l1	1.23366	1.20764	1.25534
Sec62	1.22888	1.18304	1.26708
Apcdd1	1.22644	1.96449	0.611393
Cald1	1.22447	1.44994	1.03658
H2afz	1.22331	1.43425	1.04752
Gclm	1.22025	1.71306	0.809578
Chchd2	1.21896	1.15772	1.27
Abcb1a	1.21439	0.925748	1.45492
Atp5a1	1.21223	1.87542	0.659582
Arpc2	1.20681	1.4206	1.02866
Tuba1a	1.20539	1.09548	1.29698
Hbb-bs	1.20395	2.64869	0
Mpzl1	1.20321	1.03633	1.34227
Apbb2	1.2003	0.544881	1.74648
Robo4	1.19894	1.04063	1.33087
Raph1	1.1971	1.16179	1.22653
Ece1	1.19317	1.16217	1.219
Arhgap29	1.19269	1.87479	0.624271
Cpe	1.19129	1.11304	1.25649
Dusp6	1.19102	0.57538	1.70405
Efna1	1.18727	0.657633	1.62864
Ivns1abp	1.18713	0.534902	1.73065
Hmgn1	1.18534	1.46483	0.952439
Ablim1	1.18369	0.378698	1.85452
Cd151	1.18263	0.9036	1.41516
Ly6e	1.18194	1.2158	1.15373
Kpna4	1.1792	1.40579	0.990377
Mcam	1.17652	1.32061	1.05645
Mdk	1.1751	1.70668	0.732123
Gm11808	1.17391	1.09548	1.23927
Lmo2	1.172	1.18901	1.15783
Mprip	1.16681	1.21482	1.1268
Eif3i	1.16678	1.3519	1.01252
Podxl	1.1666	0.825991	1.45044
Hspg2	1.1665	1.62563	0.783891
Nckap1	1.16531	1.1515	1.17681
Slc39a8	1.16419	0.657633	1.58632
Map1lc3b	1.1583	1.15887	1.15783
Arpc5	1.1529	1.57152	0.804048
Atp5j	1.15215	1.83526	0.58288
Ptk2	1.15198	0.95732	1.3142
Tnrc6a	1.14976	1.03875	1.24227
Sub1	1.14855	1.40579	0.934177
Rc3h2	1.14775	0.667918	1.54761
Fus	1.14753	1.52425	0.833592
Cox6b1	1.14682	1.61602	0.75583
Oaz1	1.14562	1.54888	0.809578
Vwa1	1.14153	0.845403	1.3883
Impad1	1.13968	1.25417	1.04428
Gas5	1.13762	1.41745	0.904438
Tpm3	1.13276	0.640421	1.54305
Nfia	1.13046	1.27054	1.01373
Srgn	1.12989	1.38362	0.918452
Selenop	1.12365	1.29134	0.983901
Pabpn1	1.12192	1.64958	0.682215
Ftl1	1.12064	1.91745	0.456642
Notch1	1.11807	1.06068	1.1659
Srsf2	1.11787	1.21753	1.03483
Dstn	1.11752	1.31001	0.957113
Ttc28	1.11749	0.384267	1.7285
Plvap	1.11701	0.826179	1.35938
Ndufa4	1.11513	0.846272	1.33917
Ddx3x	1.11319	0.929147	1.26656
Timp3	1.11198	0.776849	1.39125
Map4	1.11126	0.9136	1.27597
Ifitm2	1.10216	1.27852	0.955191
Cdk4	1.10207	1.71184	0.593931
Eif3f	1.10022	1.2695	0.959155
Rbm3	1.09983	1.1515	1.05677
Relb	1.09971	0.755592	1.38647
Rapgef1	1.09871	0.929147	1.24001
Igfbp3	1.09187	0.531253	1.55905
Rad21	1.08804	0.874253	1.2662
Grcc10	1.08713	1.33719	0.878751
Tle5	1.08647	1.49128	0.749119
Arpc1b	1.08488	1.96488	0.351547
Wdr26	1.08365	0.733947	1.37507
Pomp	1.08352	1.01855	1.13767
Ywhaz	1.08268	1.16065	1.01771
Atox1	1.08221	1.49731	0.736293
Cct4	1.08048	0.922598	1.21204
Atp1a1	1.08027	1.23793	0.948887
Srsf7	1.07957	1.05858	1.09707
March7	1.079	1.11778	1.04668
Sumo2	1.07777	0.929147	1.20162
Ube2d3	1.07747	1.31593	0.878751
Ppic	1.07602	1.0171	1.12513
Nrep	1.07414	0.837103	1.27167
H2-D1	1.073	1.05519	1.08785
Zbtb20	1.07107	0.855688	1.25055
Tns1	1.07094	0.283157	1.72743
Oaz2	1.07047	1.60224	0.627329
Lrp10	1.06879	0.885942	1.22116
Mxd4	1.06627	0.814411	1.27615
Taf1d	1.0659	0.371325	1.64471
Pabpc4	1.06546	1.07362	1.05866
Akr1a1	1.06457	1.1402	1.00155
Ube2h	1.06328	0.676489	1.3856
Gatad2b	1.06211	0.663548	1.39424
Tpm1	1.05657	0.957468	1.13915
Gpcpd1	1.05475	0.657633	1.38568
Ywhah	1.05448	1.04612	1.06145
P4hb	1.05149	0.954077	1.13267
Tomm7	1.05082	1.10358	1.00685
Eif5b	1.05076	0.843495	1.22347
Plpp3	1.04896	0.657633	1.37507
Pea15a	1.04789	1.17861	0.938963
Slc9a3r2	1.04752	1.5666	0.614945
Mif	1.04723	1.50703	0.664068
Elob	1.0472	1.04781	1.04668
Tmem176b	1.04714	1.24015	0.886289
Tmem256	1.04343	1.10575	0.991504
Map4k4	1.04253	1.42651	0.722553
Cox6a1	1.03789	1.37591	0.756198
Abl1	1.03314	1.18222	0.908913
Cox5b	1.03011	1.70967	0.463802
Myo10	1.0279	1.21797	0.869511
Canx	1.02768	1.58057	0.566944
Stx4a	1.02734	1.05562	1.00377
Bgn	1.02714	0.283157	1.64712
Cyyr1	1.02695	0.762964	1.24695
Atp1b3	1.02658	0.885942	1.14377
Bsg	1.02644	1.20633	0.876529
Calm2	1.0261	0.944605	1.09402
Arid1a	1.02591	1.67291	0.486738
Atrx	1.02571	0.676489	1.31672
Arhgef12	1.01789	1.30686	0.777075
Ppp2r5c	1.0175	0.874253	1.13687
Aplnr	1.01664	1.35312	0.736242
Micos10	1.01453	0.922598	1.09113
Ergic3	1.01446	1.11692	0.92907
Selenok	1.01053	1.48949	0.611393
Pitpnm2	1.01017	1.43088	0.659582
Wasf2	1.00946	1.63673	0.486738
Vwf	1.00644	0.283157	1.60918
Atp5c1	1.00453	1.5356	0.56197
Yy1	1.00351	0.938213	1.05792
Serf2	1.00038	1.81764	0.319337
Itm2c	0.999662	1.22776	0.809578
Hsp90b1	0.999142	0.64599	1.29343
Amotl1	0.998853	1.52311	0.56197
Smarcc2	0.995751	0.553946	1.36392
Trim28	0.995357	1.10713	0.902216
Ppp1cc	0.995208	1.34173	0.706436
Atp5d	0.994994	0.949415	1.03298
Pitpna	0.990835	0.640421	1.28285
Snrk	0.99007	0.972978	1.00431
Serbp1	0.988608	1.18182	0.827595
Slc25a5	0.986838	1.8358	0.279373
Ap2m1	0.986588	0.560338	1.3418
Txndc12	0.984055	1.11876	0.871796
Hnrnpc	0.983333	1.0171	0.955191
Xist	0.983125	0.654483	1.25699
Kank3	0.982291	1.04564	0.929504
Eif4a1	0.980671	0.909951	1.0396
Hspa5	0.977777	1.00818	0.952439
Srsf1	0.977565	0.951076	0.99964
Dync1h1	0.976774	1.15883	0.825062
Dusp11	0.976646	0.688132	1.21708
Mtus1	0.974791	0.57538	1.30763
Tmem50a	0.973855	0.784833	1.13137
Wdr1	0.971916	1.20633	0.776572
Fkbp3	0.969656	1.34173	0.659591
Elk3	0.968853	1.33194	0.666279
Arap3	0.968771	0.689352	1.20162
Calr	0.966479	1.4172	0.590883
F11r	0.966372	0.67431	1.20976
Hmcn1	0.96484	0.654483	1.22347
Gm45833	0.964716	1.24383	0.732123
Snrpe	0.9647	0.57538	1.28913
Csnk2b	0.96391	0.478344	1.36855
Prkab1	0.96159	0	1.76292
Cavin1	0.959095	0.86261	1.0395
mt-Nd4l	0.95894	1.04612	0.886289
Cltc	0.958747	1.13598	0.811056
Tmem88	0.95722	1.02322	0.902216
Morf4l1	0.95493	1.05513	0.871433
Snx3	0.953944	0.904492	0.995155
Psmb1	0.953712	1.06907	0.857579
Rtl8b	0.948334	0.932644	0.961409
Tma7	0.947754	1.11356	0.809578
Fmnl3	0.946986	0.371325	1.4267
Bmf	0.946368	0.825991	1.04668
Ndufc2	0.945289	1.60938	0.391877
Pcnx	0.945229	0.371325	1.42348
Fzd6	0.945072	0.507691	1.30956
Nudcd3	0.944812	0.775807	1.08565
Nova2	0.944361	0.268115	1.5079
Cox7a2l	0.94426	1.07362	0.836461
Peli1	0.943845	0.395909	1.40046
Ncl	0.943772	1.67361	0.335572
Ushbp1	0.943005	0.932644	0.951639
Hdlbp	0.942999	1.11304	0.801297
Arhgef15	0.941891	0.478344	1.32818
Exoc5	0.938929	0.849669	1.01331
Ptges3	0.937438	1.03753	0.854027
Cav1	0.93636	0.573054	1.23912
Scarb1	0.936335	0.923578	0.946966
Slc39a10	0.935492	1.37864	0.5662
Mxra8	0.934886	1.40057	0.546816
H1f0	0.933095	1.31914	0.611393
Atpif1	0.932473	1.48824	0.469332
Tln1	0.92926	1.39486	0.541257
Dll4	0.928665	0.843495	0.99964
Slc25a4	0.927959	1.32879	0.593931
Ddx17	0.927618	0.395909	1.37071
Ttc3	0.927316	0.292223	1.45656
Picalm	0.927314	0.689352	1.12561
Foxq1	0.926248	1.23006	0.673067
Sox13	0.924567	0.64599	1.15671
Jag1	0.924263	0.654483	1.14908
Uqcrc1	0.92417	0.956247	0.897438
Ypel3	0.923514	1.31914	0.593827
Mrpl52	0.922558	1.31691	0.593931
Ets2	0.92066	0.676489	1.12414
Hnrnpd	0.919203	0.997413	0.854027
Prkacb	0.918149	1.06068	0.799375
Rnf44	0.917877	1.5577	0.384695
Ywhaq	0.917603	0.654483	1.13687
Sox7	0.917369	0.406195	1.34335
Igf2	0.916654	0.741716	1.06244
Rflnb	0.915805	0.761501	1.04439
Lpp	0.914009	0.661855	1.12414
Phlda1	0.913991	0.667424	1.11946
Atp5o	0.912089	1.15887	0.706436
Eif5	0.911894	1.21797	0.656831
Adgre5	0.911205	0.283157	1.43458
Atp6v0c	0.910786	0.663548	1.11682
Banf1	0.909999	0.667424	1.11214
Sf3b4	0.90923	1.03875	0.801297
Sptan1	0.908519	0.625959	1.14399
Rapgef5	0.906939	0.874253	0.934177
Exoc3l	0.905364	1.08683	0.754139
Tmem234	0.904587	1.14237	0.706436
Ddb1	0.903563	0.851841	0.946665
Elavl1	0.903473	0	1.65637
Anp32b	0.90346	0.640421	1.12266
Ppig	0.902368	0.652382	1.11069
Hspe1	0.901717	0.733947	1.04153
Rab1a	0.901393	0.949415	0.861375
Eif4g3	0.899181	1.03753	0.783891
Cracr2b	0.899163	1.10522	0.72745
Gabarap	0.898461	0.441724	1.27908
Macf1	0.897982	0.667918	1.0897
Dock4	0.897304	1.00818	0.804905
Itga1	0.896226	1.33097	0.533939
Stag2	0.895437	0.384267	1.32141
Dok4	0.895249	0.667918	1.08469
Lgals9	0.89423	0.935539	0.859806
Id2	0.89233	0.914105	0.874184
Notch4	0.891901	0.64599	1.09683
Fyn	0.890696	0.292223	1.38942
Klf2	0.887252	1.07073	0.734353
Stx6	0.886785	0.292223	1.38225
Gdi2	0.885714	1.30784	0.533939
Cnn3	0.884883	0.755592	0.992625
Pnisr	0.883899	0.478344	1.22186
Itprid2	0.882528	0.560338	1.15102
Lamc1	0.882377	0.268115	1.39426
Clic1	0.881477	1.14237	0.664068
Eif3h	0.879688	1.60007	0.279373
Itpkb	0.878676	0.467575	1.22126
Ostc	0.877416	1.2176	0.593931
Ptbp1	0.876599	1.2158	0.593931
Wnk1	0.876484	1.63711	0.242634
Aamp	0.875053	1.05519	0.724941
Rpl22l1	0.874864	1.15555	0.640963
Ahnak	0.873895	0.951076	0.809578
Matr3	0.872926	0.57538	1.12088
Cox6c	0.871729	0.956247	0.801297
Srrm2	0.870283	0.936034	0.815491
Ralgapa1	0.868205	0.825991	0.903383
Sema6a	0.867455	1.06068	0.706436
Fli1	0.866589	1.1515	0.629162
Ier5	0.866411	0.553946	1.1268
Hprt	0.863233	0.822061	0.897543
Rbbp4	0.863225	0.378698	1.267
Nbeal1	0.862501	1.03318	0.720267
Hlx	0.862433	0.781949	0.929504
Tmed7	0.86241	0.553946	1.11946
Brd2	0.862144	1.10522	0.659582
Abhd17a	0.861791	0.551273	1.12056
Olfr1423	0.861195	0.551273	1.11946
Ube2r2	0.860557	0.77752	0.929753
Zfp207	0.859633	0.395909	1.24607
Acer2	0.857804	0.268115	1.34921
Cgnl1	0.856921	1.04612	0.699254
Acvrl1	0.856874	0.802104	0.902517
Tmco1	0.8567	1.04564	0.699254
Dlgap4	0.856507	0.812996	0.892765
Plod1	0.855117	0.283157	1.33175
Rgcc	0.855065	0.553946	1.106
Trir	0.854595	1.31691	0.469332
Prkch	0.854298	0.544881	1.11214
Caskin2	0.852	0.938213	0.780156
Arhgdia	0.851936	0.935539	0.782267
Pdcd10	0.851866	0.762964	0.925952
Mtdh	0.851816	0.560338	1.09471
Slc29a1	0.851742	0.639441	1.02866
Epb41l2	0.849798	0.667424	1.00178
Prrc2a	0.84874	0.57538	1.07654
Slc39a1	0.848616	1.48949	0.314559
Efnb2	0.847193	0.762964	0.917384
Arglu1	0.84664	0.441724	1.18407
Mark3	0.846372	0.812996	0.874184
Mylk	0.84578	0.406195	1.2121
Kpnb1	0.84573	0.652382	1.00685
Dctn5	0.845417	1.21919	0.533939
Tmpo	0.844364	0.746459	0.925952
Ilk	0.844345	0.652382	1.00431
Mkln1	0.843805	0.667918	0.990377
Rassf3	0.843083	0.664025	0.992299
2410006H16Rik	0.84293	1.17741	0.564193
Ppp2ca	0.842374	1.19704	0.546816
Ppp1r18	0.841281	1.03753	0.67774
Sh3glb1	0.840619	0.767234	0.901773
Mapre1	0.840301	0.67431	0.978626
Ssrp1	0.838699	0.997413	0.706436
H19	0.838362	0.732651	0.926455
Eif3d	0.837921	1.31593	0.439581
Tek	0.836691	0.992997	0.706436
Luzp1	0.835994	0.378698	1.21708
Thoc2	0.835064	0.64599	0.992625
Ntan1	0.834874	0.759797	0.897438
Rab7	0.83395	1.02371	0.675818
Frmd6	0.832161	1.04829	0.652053
Rrp1	0.831454	1.42651	0.335572
Prdx1	0.828399	1.14811	0.56197
Psma3	0.828121	1.10915	0.593931
Hnrnpa0	0.825496	0.551273	1.05402
Tcf25	0.824811	1.108	0.588824
Snrpb	0.824761	1.43127	0.319337
Dlc1	0.823151	0.378698	1.19353
Btg1	0.82142	1.09411	0.594181
Psap	0.821043	0.654483	0.959843
Tnks2	0.82017	1.33412	0.391877
Hnrnph1	0.820119	0.746459	0.881503
Prnd	0.819613	1.22137	0.484816
Rbx1	0.819537	1.27548	0.439581
Ost4	0.819529	1.39797	0.337494
Tra2a	0.819251	0.77752	0.854027
1110018N20Rik	0.818869	0.640421	0.967575
Tnks	0.818591	0.544881	1.04668
Selenof	0.818464	1.0879	0.593931
Sypl	0.817852	0.688132	0.925952
Rpl36a-ps1	0.817747	0.750023	0.874184
Gimap4	0.817521	1.11821	0.566944
Irak1	0.817496	0.866605	0.776572
Cavin2	0.817394	1.11793	0.566944
Rnf144a	0.816826	0.986035	0.675818
Eif3e	0.816617	0.384267	1.17691
Dbi	0.815556	0.268115	1.27176
Limch1	0.815556	0.268115	1.27176
Grb2	0.815099	1.15249	0.533939
Tdrp	0.814777	0.851841	0.783891
Cope	0.813982	1.61167	0.149244
Son	0.813907	0.761501	0.857579
Gpx4	0.812319	1.31001	0.397572
Sec31a	0.811425	0.667424	0.931426
Lamp1	0.811057	1.22776	0.463802
Sf3b1	0.810601	0.667918	0.929504
Snrnp48	0.80986	0.384267	1.16452
Gpx1	0.809718	1.10702	0.56197
Mafg	0.809687	0.822061	0.799375
Mdm4	0.809334	0.790461	0.825062
Fbxl7	0.809334	0.790461	0.825062
Hnrnpf	0.808632	1.03875	0.616867
Man1c1	0.808078	0.837103	0.783891
Spag9	0.808078	0.837103	0.783891
Eid1	0.807984	1.31593	0.384695
Ankfy1	0.807788	0.661855	0.9294
Tia1	0.807161	1.21919	0.463802
Csk	0.806894	0.664025	0.925952
Ptprg	0.805558	0.544881	1.02279
Flnb	0.805316	0.790461	0.817694
Jun	0.805004	0.67431	0.913916
Atp5f1	0.804692	0.922598	0.706436
Tnrc6b	0.804086	0.837103	0.776572
Ccar1	0.803736	0.750023	0.848497
S1pr1	0.803394	1.07362	0.578206
Psmb3	0.80338	0.922598	0.704032
Myl12b	0.802357	0.959646	0.671282
Irf2bp2	0.80192	0.676489	0.906446
Ccndbp1	0.801444	1.00818	0.629162
Palmd	0.801006	0.560338	1.00156
Acta2	0.79753	0.762964	0.826334
Grb10	0.796696	1.0724	0.566944
Glul	0.796363	1.16461	0.489489
Ccdc88a	0.796128	0.378698	1.14399
Hmgn2	0.795954	1.19454	0.463802
Klc1	0.79564	0.925748	0.687217
Eif4e2	0.795492	0.667424	0.902216
Sorbs2	0.795485	0.467575	1.06874
Rnf167	0.795219	0.507691	1.03483
Psme3	0.794913	1.34051	0.340246
Svil	0.794834	0.812448	0.780156
Ehd4	0.794446	0.507691	1.03341
Sh3bgrl	0.793682	0.774607	0.809578
Uba1	0.79355	0.914105	0.693088
Prrc2b	0.793533	0.501676	1.03675
Hnrnpl	0.793039	0.544881	0.999837
Stmn1	0.7928	1.06383	0.566944
Taok2	0.792661	0.689352	0.878751
Ddit4	0.791682	1.04225	0.58288
Ociad1	0.791612	0.689352	0.876829
Rpn2	0.790992	0.378698	1.13457
Flt4	0.790451	0.292223	1.20564
Psmd1	0.788978	0.283157	1.21049
Slfn5	0.788847	0.855688	0.733145
Sema6d	0.788701	0	1.44595
Ifngr2	0.788341	0.268115	1.22186
Scarf1	0.787806	0.661855	0.892765
Cotl1	0.787782	0.767234	0.804905
Clec14a	0.787509	0.64599	0.905441
Fryl	0.786602	0.790849	0.783063
Plec	0.786323	1.05519	0.562271
Pitpnc1	0.786115	0.384267	1.12099
Dst	0.78559	0.553946	0.978626
Atp5md	0.785487	0.73569	0.826984
Uqcr11	0.784694	0.733947	0.826984
Mgp	0.780995	1.03875	0.5662
Ddah2	0.78096	0.845171	0.72745
Atp5j2	0.778072	1.4206	0.242634
Tnpo3	0.778026	1.53256	0.149244
Rbm8a	0.777292	0.837103	0.72745
Tmem106b	0.777113	0.283157	1.18874
Spin1	0.776974	0.923578	0.654805
Lxn	0.776878	1.14593	0.469332
Skp1a	0.775851	0.954077	0.627329
Sfswap	0.775465	1.32855	0.314559
Gorasp2	0.774501	0.520225	0.986397
Rapgef3	0.773365	0.652382	0.874184
Ppfibp1	0.773087	0.729298	0.809578
Dusp3	0.773004	0.822061	0.732123
Ppdpf	0.772062	0.732651	0.804905
Ptn	0.772015	1.02371	0.562271
Tial1	0.771168	0.914105	0.652053
Cox5a	0.77046	0.64599	0.874184
Hey1	0.768619	0.268115	1.18571
Ptbp3	0.767929	1.21919	0.391877
Ctbp1	0.76778	0.67092	0.848497
Mast4	0.767719	0	1.40748
Lifr	0.767221	0.493691	0.995163
Nos3	0.767159	0.954077	0.611393
Tcp1	0.767105	0.551273	0.946966
Rhoj	0.766817	1.10522	0.484816
Wwtr1	0.764534	0.667424	0.84546
Leprot	0.764054	0.384267	1.08054
Bicd2	0.763947	0.371325	1.09113
Pgk1	0.762915	1.00138	0.564193
Tspan9	0.762872	0.478344	0.999978
Sec11c	0.761018	0.676489	0.831458
Larp1	0.760982	0.268115	1.1717
Mtpn	0.7606	0.732651	0.783891
Srsf11	0.759945	1.26919	0.335572
Eva1b	0.759844	0.553946	0.931426
Angel2	0.757456	0.292223	1.14515
Snrpg	0.754771	0.781949	0.732123
Ythdc1	0.754366	0.661855	0.831458
Tgfbr2	0.753697	0.87567	0.652053
Naa15	0.752911	0.664025	0.826984
Hbb-bt	0.752644	1.65582	0
Nop53	0.75259	1.17861	0.397572
Vdac3	0.752447	0.657633	0.831458
Akap13	0.752317	0.885942	0.640963
Galnt1	0.752301	1.3639	0.242634
Copa	0.747629	0.837103	0.673067
Rab14	0.747342	0.812448	0.693088
Eif3m	0.746339	1.64195	0
Rabac1	0.746146	0.67092	0.808834
Zfp553	0.745575	0.77752	0.718953
Pttg1ip	0.745445	0.959646	0.566944
Ssr3	0.744441	0.846272	0.659582
Rgs3	0.744269	0.378698	1.04891
Lama4	0.743494	0.956247	0.5662
Thrap3	0.743462	0.922598	0.594181
Sptlc2	0.743325	0.922598	0.593931
Tmod3	0.742928	0.761501	0.72745
Ppp1r14b	0.742238	0.544881	0.906701
Psmb7	0.741363	0.553946	0.897543
Rab5c	0.741023	1.45116	0.149244
Ndufb5	0.740782	1.04564	0.486738
Krtcap2	0.740742	1.04225	0.489489
Srek1	0.740689	0.639441	0.825062
Psmb4	0.740684	1.33834	0.242634
Ppp1r9b	0.740585	1.0419	0.489489
Cpsf6	0.740576	0.261723	1.13962
Magt1	0.740126	0.959646	0.557193
Prdx2	0.739305	1.15622	0.391877
Nek7	0.738747	0.77752	0.706436
Hdac1	0.738454	0.544881	0.899765
Entpd1	0.738445	0.64599	0.815491
Ppp1ca	0.738087	1.62379	0
Rock1	0.737571	0.755592	0.722553
Hnrnpul1	0.737153	0.371325	1.04201
Mcf2l	0.736673	0.577267	0.869511
Klf3	0.736646	0.688132	0.777075
Zmiz2	0.736342	0.750023	0.724941
Sox18	0.735984	0.873769	0.621163
Gna11	0.735981	0	1.3493
Alkbh8	0.735815	0.57538	0.869511
Lims1	0.735202	0.478344	0.949251
Gngt2	0.735112	1.43815	0.149244
Rnps1	0.735048	0.384267	1.02737
Traf7	0.734924	1.34479	0.226698
Znrd1	0.734694	1.14607	0.391877
Ran	0.734037	1.16065	0.378529
Rap1b	0.732978	1.34051	0.226698
Tug1	0.73256	0.652382	0.799375
Atp2a2	0.732552	0.384267	1.02279
Lrrc8c	0.732089	0.67092	0.783063
Csrp1	0.731946	1.27503	0.279373
Pdap1	0.731895	0	1.34181
Rai14	0.731398	0.551273	0.881503
Ctdsp2	0.731288	1.04564	0.469332
Pros1	0.731249	1.05218	0.463802
Tacc1	0.73108	0.676489	0.776572
Foxo1	0.731012	1.18637	0.351547
Tspan4	0.730819	0.762964	0.704032
Ltbr	0.730297	1.02487	0.484816
Ctdnep1	0.7299	0.553946	0.876529
Mcl1	0.728943	0.820819	0.652379
Ccdc85b	0.728494	0.406195	0.997077
Chst15	0.728493	0.544881	0.881503
G3bp1	0.728087	1.32975	0.226698
Sem1	0.727967	0.927162	0.56197
Degs1	0.727882	0.261723	1.11635
Txnip	0.72741	0.283157	1.09762
Anapc5	0.727131	1.4206	0.149244
Lmna	0.726263	0.929147	0.557193
Ick	0.725627	1.03318	0.469332
Sox4	0.72393	1.32061	0.226698
Clic4	0.721121	0	1.32205
Rbfox2	0.720942	1.05257	0.444583
Grn	0.719896	0.67431	0.757884
Ewsr1	0.718863	0.997413	0.486738
Unc45b	0.718544	1.28964	0.242634
Nsfl1c	0.718362	0.769415	0.675818
Ddah1	0.71805	0.780176	0.666279
Ak3	0.717215	0.837633	0.616867
Zdhhc20	0.715928	0.478344	0.913916
Cyb5r4	0.714349	0.746908	0.687217
Utrn	0.71347	0.857041	0.593827
Drap1	0.712339	0.92642	0.533939
Actr1b	0.7123	0.664025	0.752529
Dhx9	0.711087	0.283157	1.0677
Ap2b1	0.711048	0.923578	0.533939
Ifi203	0.710954	0.733947	0.691793
Csnk1d	0.710573	0.292223	1.0592
Tjp2	0.710183	0.478344	0.903383
Tfg	0.710069	0.57538	0.82231
Nap1l4	0.709433	0.886389	0.56197
Myadm	0.708458	0.733947	0.687217
Rab2a	0.707988	0.994374	0.469332
Mmp14	0.707841	1.28521	0.226698
Med13l	0.707467	1.08618	0.391877
Nufip2	0.707322	0.384267	0.976535
Gtf2i	0.706742	0.914105	0.533939
Maged1	0.706168	0.927162	0.522006
Tm9sf3	0.705821	0.667424	0.737818
Luc7l	0.705772	0.741716	0.675818
Cflar	0.703724	0.775807	0.643655
Pebp1	0.703362	0	1.2895
Igf1r	0.703124	0.57538	0.809578
Api5	0.702877	0.551273	0.829214
Eif4b	0.702714	0.667424	0.732123
Ciapin1	0.702588	1.21045	0.279373
Atp2b1	0.70224	0.733947	0.675818
Caml	0.702004	0.639441	0.754139
Kansl1	0.701599	0.849669	0.578206
Ftl1-ps1	0.701536	1.36429	0.149244
Cd38	0.701132	0.292223	1.04189
BC028528	0.700666	0.954077	0.489489
Midn	0.700151	0.956247	0.486738
Jcad	0.700151	0.956247	0.486738
Rell1	0.698607	0.57538	0.801297
Snhg20	0.698607	0.57538	0.801297
Atp2c1	0.697677	0	1.27908
Glmp	0.697576	0.944605	0.491719
Dazap2	0.695445	0.954077	0.479919
St3gal6	0.695207	0.785914	0.619618
Cherp	0.693354	0.467575	0.881503
Pgam1	0.692533	1.02322	0.416957
Pear1	0.692172	1.11778	0.337494
Pbx1	0.691285	1.34173	0.149244
Mfsd2a	0.691211	0.639441	0.734353
Ylpm1	0.690365	0.553946	0.804048
Nostrin	0.689369	0.529839	0.82231
Serpine2	0.689113	0.57538	0.783891
Cdh2	0.689089	0.283157	1.02737
Ankrd11	0.688968	1.11304	0.335572
Pde2a	0.688555	0.802104	0.593931
Arl6ip1	0.688199	1.17879	0.279373
Eml1	0.687547	0.268115	1.03707
Tax1bp3	0.687342	1.0419	0.391877
Psma1	0.686942	0.663548	0.706436
Ube2i	0.686601	0.551273	0.799375
Tmem127	0.685965	0.261723	1.0395
Snn	0.685897	0.799914	0.590883
Gm47283	0.685741	0.268115	1.03376
Psmd13	0.68524	0.925748	0.484816
Fbxl20	0.684786	0.667424	0.699254
Hsp90aa1	0.684224	0.378698	0.938829
Slc44a1	0.683833	0.268115	1.03027
Actr2	0.683416	0.261723	1.03483
Med25	0.682821	0.654483	0.706436
Cav2	0.682639	0.732651	0.640963
Naa20	0.682541	0.371325	0.941888
Srrt	0.682527	0.802104	0.58288
Nucb1	0.682305	0.67092	0.691793
Ubap2l	0.682249	0.919169	0.484816
Dnaja1	0.681866	0.652382	0.706436
Tgfb1	0.681469	0.936034	0.469332
Tmeff1	0.680803	0.507691	0.825062
Rps6ka3	0.679875	0.529839	0.804905
Chmp1a	0.679756	0.268115	1.02279
1810037I17Rik	0.679731	0.384267	0.925952
Flna	0.679198	0.292223	1.00168
Wwc2	0.679135	0.292223	1.00156
Psmb2	0.678079	1.02152	0.391877
Ndufb8	0.678075	1.03753	0.378529
Anapc11	0.678054	0.520225	0.809578
Kdelr1	0.677501	0.531253	0.799375
Dvl3	0.676858	0.529839	0.799375
Esd	0.676556	1.19726	0.242634
Ldb2	0.676523	0.292223	0.996773
Adam15	0.676237	0.812996	0.562271
Ndufb1-ps	0.676073	0.812996	0.56197
Robo1	0.676073	0.812996	0.56197
Ube2l3	0.675733	0.837103	0.541257
Mfap2	0.675043	0.64599	0.699254
Cct7	0.675006	0.688132	0.664068
Arpc4	0.67368	0.855688	0.522006
Map3k3	0.672227	0.667918	0.675818
Vdac2	0.671835	0.395909	0.901773
Paip2	0.67092	0.676489	0.666279
Ehd2	0.670108	0.60761	0.722189
Mecom	0.670077	0	1.22847
Aco2	0.670011	0.780176	0.578206
Nrarp	0.669289	0.268115	1.0036
Clptm1	0.668415	0.70984	0.633895
Trim30a	0.667906	0.378698	0.908913
Fnbp1l	0.66784	0.507691	0.801297
Calm3	0.667604	1.28964	0.149244
Prss23	0.666896	0	1.22264
Aldoa	0.666791	0.507691	0.799375
Ebf1	0.666561	0.378698	0.906446
Atp5e	0.666222	1.2866	0.149244
Tbc1d20	0.665606	0.784892	0.5662
Rpn1	0.665465	0.378698	0.904438
Nisch	0.665064	0.531253	0.776572
Zbtb4	0.664417	0.378698	0.902517
Ptp4a3	0.663949	0.467575	0.827595
Use1	0.663718	1.05519	0.337494
Acin1	0.663151	0.57538	0.736293
Srp14	0.662354	1.05218	0.337494
BC031181	0.66213	0.67092	0.654805
Pex14	0.662112	0.676489	0.650131
Nudt3	0.662093	0.57538	0.734353
Kdm5a	0.661426	0.814411	0.533939
Atp6v1g1	0.661336	0.774607	0.566944
H2afv	0.661098	1.04612	0.340246
Hnrnpm	0.660778	0.395909	0.881503
Rgs2	0.660693	0.544881	0.757203
Ncor1	0.659806	0.776849	0.562271
Mta2	0.659354	0.781949	0.557193
Tmcc1	0.659244	1.45034	0
Smap1	0.659103	0.689352	0.633895
Sdf4	0.658089	0	1.2065
Git2	0.657589	0.67431	0.643655
Myo1b	0.657495	0.664025	0.652053
Kdelr2	0.657145	0.560338	0.737818
Pik3ca	0.656873	0.268115	0.980838
Sec61a1	0.655667	0.268115	0.978626
Atpaf2	0.655198	1.03875	0.335572
Mef2d	0.653968	0.261723	0.980838
Alyref	0.653927	0.283157	0.962901
Med13	0.653842	0.292223	0.955191
Tm6sf1	0.653335	0.654483	0.652379
Cnih1	0.653298	0.688132	0.624271
Plk2	0.653167	0.873769	0.469332
Mapk1	0.651621	0.261723	0.976535
Xpr1	0.651499	0.292223	0.950895
Stx5a	0.651446	0.664025	0.640963
Dgkh	0.650855	0.64599	0.654909
Rhob	0.650725	0.762964	0.557193
Nfe2l1	0.65054	0.790461	0.533939
Lats2	0.650403	0.292223	0.948887
Pitpnb	0.650278	0.395909	0.862252
Cux1	0.649976	0.261723	0.973519
Capzb	0.648993	1.24869	0.149244
Srgap2	0.648585	0.553946	0.72745
Rab11b	0.647932	1.04225	0.319337
Lef1	0.647766	0.261723	0.969468
Atp6v1a	0.647619	0.529839	0.745769
Ube2d2a	0.646904	0	1.18599
Dab2ip	0.646733	0.261723	0.967575
Gm10801	0.646733	0.261723	0.967575
Nus1	0.645779	0.667918	0.627329
Hadh	0.645421	0.268115	0.959843
Tcof1	0.645085	1.0165	0.335572
Spns2	0.645072	0.441724	0.814529
Uqcrfs1	0.644843	0.750023	0.557193
Slain2	0.644184	0.261723	0.962901
Arf1	0.644184	0.261723	0.962901
Fads1	0.6432	0.851841	0.469332
Smg1	0.643117	0.944605	0.391877
Hip1	0.641956	1.07706	0.279373
Dcaf8	0.641586	0.949855	0.384695
Qdpr	0.640982	0.676489	0.611393
Klf7	0.640946	0.268115	0.951639
Elovl1	0.640212	0.938213	0.391877
Etnk1	0.63983	0.292223	0.929504
Sema3g	0.638125	0.261723	0.951792
Gm17494	0.637893	0.292223	0.925952
Rap1a	0.636987	1.40137	0
Lypla1	0.636091	0.929147	0.391877
Lta4h	0.636091	0.929147	0.391877
Top1	0.636021	0.724882	0.56197
Fnta	0.63571	0.283157	0.929504
Actl6a	0.635028	0.994374	0.335572
Tmem184b	0.634515	0.560338	0.69633
Sec14l1	0.633973	0.283157	0.926319
Bri3	0.633964	0.688132	0.588824
Atp6v0a1	0.633802	0.292223	0.918452
Paics	0.632722	0.261723	0.941888
Tomm20	0.63199	0.551273	0.699254
Ttyh3	0.630467	0.67431	0.593931
Bambi	0.630395	0.551273	0.69633
Rheb	0.628444	0.378698	0.836565
Larp4b	0.628383	0.741716	0.533939
Pum2	0.628254	0.732651	0.541257
Srrm1	0.6279	0.449494	0.776572
Ldb1	0.627698	0.667918	0.594181
Hnrnpa3	0.627553	0.997413	0.319337
Hras	0.627372	0.441724	0.782078
Ccnd1	0.626789	0.9247	0.378529
Dag1	0.626655	1.37864	0
Mest	0.626186	0.814411	0.469332
Mink1	0.626103	0.261723	0.929753
Cops9	0.625429	0.676489	0.58288
Tsn	0.62511	0.292223	0.902517
Smc6	0.62511	0.292223	0.902517
Rbm25	0.624806	0.661855	0.593931
Tada1	0.624651	1.08307	0.242634
Tbx1	0.624478	0.283157	0.908913
Sppl3	0.624369	0.441724	0.776572
Ccnyl1	0.622696	0.551273	0.682215
Etv1	0.622263	0.784892	0.486738
Emc10	0.621889	0.292223	0.89661
Sfpq	0.621674	0.543022	0.687217
Psmd11	0.621498	1.07613	0.242634
Akap11	0.62147	0.553946	0.67774
Ndufa11	0.619939	0.261723	0.918452
Atp7a	0.619791	0.292223	0.892765
Emp3	0.61926	0.954077	0.340246
Hipk1	0.61876	0.667424	0.578206
C130074G19Rik	0.618152	1.02469	0.279373
Rfx7	0.617768	0.283157	0.89661
Pds5a	0.6171	0.292223	0.887831
Fam129b	0.61671	0.688132	0.557193
Lnx2	0.61668	0.292223	0.887062
Dnajc5	0.616271	0.531253	0.68712
Adam10	0.616164	0.822061	0.444583
Eif3l	0.615909	0.946705	0.340246
Cnn2	0.615476	0.790849	0.469332
2900097C17Rik	0.615347	0.951076	0.335572
Ranbp3	0.614954	0.944605	0.340246
Pxn	0.61489	0.87567	0.397572
Glrx3	0.614561	0.639441	0.593827
Cep68	0.614455	0.384267	0.806278
Kctd3	0.614448	0.261723	0.908386
Swi5	0.613705	0.384267	0.804905
Fgd5	0.613648	0.292223	0.881503
Appl1	0.613238	0.384267	0.804048
Sumo1	0.612877	0.654483	0.578206
Puf60	0.612769	0.784892	0.469332
Rtn3	0.612621	0.57538	0.643655
Ostf1	0.612315	1.168	0.149244
Wac	0.611865	0.560338	0.654805
Cyb5a	0.611662	1.07362	0.226698
Capn2	0.611566	0.64599	0.58288
Uvssa	0.611566	0.64599	0.58288
Birc6	0.611566	0.64599	0.58288
Icam2	0.611247	0.762964	0.484816
Prdx5	0.61067	0.283157	0.883597
Wdfy1	0.610517	0.767234	0.479919
Scd2	0.610484	0.384267	0.798998
Tmem30a	0.610085	0.661855	0.566944
Shisa5	0.610068	0.667424	0.562271
Naa10	0.6095	0.938213	0.335572
Nktr	0.609464	0.529839	0.675818
Npr3	0.608715	0	1.11598
Enc1	0.608493	0.406195	0.777075
Crebbp	0.608338	1.33834	0
Sike1	0.608018	0.688132	0.541257
Rnasek	0.607928	0.929147	0.340246
Psma7	0.607608	0.780176	0.463802
Nsmce4a	0.607298	0.667424	0.557193
Copb2	0.606654	1.15555	0.149244
Wbp2	0.606411	0.553946	0.650131
Tspyl1	0.606049	0.371325	0.801652
Dph3	0.605855	0.371325	0.801297
Kansl2	0.604807	0.371325	0.799375
Nsa2	0.604742	0.767234	0.469332
Get4	0.604442	1.32977	0
Wsb1	0.603716	0.57538	0.627329
Dynlrb1	0.603442	1.32757	0
Dock1	0.603405	1.03633	0.242634
Sdhc	0.602847	0.657633	0.557193
Bmp1	0.602701	0.855688	0.391877
Ctsl	0.602658	0.573054	0.627329
Map2k2	0.602402	0.922598	0.335572
Kctd17	0.601373	0.64599	0.564193
Reep5	0.601373	0.64599	0.564193
Rsu1	0.601106	0.449494	0.72745
Usp33	0.600927	0.261723	0.883597
Rbbp7	0.60046	0.652382	0.557193
Trib2	0.600161	0.64599	0.56197
Afap1l1	0.599933	1.04781	0.226698
Sf3b5	0.599678	1.1402	0.149244
Htra1	0.59926	0.378698	0.783063
Dgkz	0.599169	0.847919	0.391877
Tspan6	0.599027	0.283157	0.862252
Ubr4	0.59883	0.667918	0.541257
Luc7l3	0.59883	0.667918	0.541257
Ctdp1	0.597675	0.378698	0.780156
Mbtps1	0.597236	0.261723	0.876829
Setd5	0.597198	0.268115	0.871433
Tmed10	0.597187	0.657633	0.546816
Tmem250-ps	0.596434	0.755592	0.463802
Vps72	0.596074	0.661855	0.541257
Lrrc8a	0.595812	1.03875	0.226698
Dpp8	0.595202	0.781949	0.439581
Smarce1	0.595162	0	1.09113
Mtch1	0.595061	0.931663	0.314559
Lmf2	0.594713	1.03633	0.226698
Cdipt	0.594541	0.283157	0.854027
Dync1i2	0.594253	0.837103	0.391877
Samd4b	0.593917	0.929147	0.314559
Gm7072	0.593917	0.929147	0.314559
Uqcrq	0.593903	0.750023	0.463802
Ldlrad4	0.592723	0.654483	0.541257
Babam1	0.592673	0.560338	0.619618
Man2b1	0.591661	1.02962	0.226698
Hnrnpdl	0.591386	0.923578	0.314559
Ghitm	0.589285	0.261723	0.862252
Zmym4	0.587811	0.501676	0.659591
Zfp362	0.587571	1.11356	0.149244
Dctn3	0.58708	0.914105	0.314559
Pak2	0.586003	0.551273	0.614945
Svbp	0.584594	1.10702	0.149244
Ykt6	0.584137	0.949855	0.279373
Dkc1	0.584066	0.551273	0.611393
Plxnb2	0.584015	0.529839	0.629162
Phldb2	0.583974	0.406195	0.732123
Trio	0.583015	0.529839	0.627329
Cd2ap	0.582475	0.724882	0.463802
Anxa7	0.582223	0.654483	0.522006
Sncaip	0.581638	0.292223	0.822817
Man1a2	0.580336	0.689352	0.489489
Usp7	0.580336	0.689352	0.489489
Bclaf1	0.579958	0.283157	0.827292
Rreb1	0.57979	0.283157	0.826984
Bcl6b	0.578742	0.283157	0.825062
Psmd8	0.578727	1.09411	0.149244
Taf10	0.578281	0.688132	0.486738
Arhgef7	0.577952	0.531253	0.616867
Cbx3	0.57763	0.935539	0.279373
Tmem37	0.577241	0.283157	0.82231
Zfand6	0.577206	0.478344	0.659591
Sept9	0.576922	0.57538	0.578206
Tpr	0.576828	0.891551	0.314559
Gm10800	0.57567	0.268115	0.831965
Tlnrd1	0.575381	0.395909	0.724941
AW549877	0.575135	0.86261	0.335572
Eif2a	0.574564	0.384267	0.733145
Sf3b2	0.574007	0.384267	0.732123
Ythdf2	0.572944	0.449494	0.675818
Fto	0.571867	0.292223	0.804905
Loxl2	0.571867	0.292223	0.804905
Psenen	0.571748	0.922598	0.279373
Gimap1	0.570779	0.57538	0.566944
Emc7	0.570369	0.667424	0.489489
Chd3	0.570369	0.667424	0.489489
Usp14	0.570369	0.667424	0.489489
Wdr48	0.570093	0.292223	0.801652
Cthrc1	0.570089	0.384267	0.724941
Znrf1	0.56989	0.283157	0.808834
Cttn	0.569341	0.371325	0.734353
Gng2	0.569278	0.57538	0.564193
Cpne3	0.568851	0.292223	0.799375
Anks1	0.568803	1.25137	0
Maz	0.568549	0.959646	0.242634
Dyrk2	0.568496	0.283157	0.806278
Uba5	0.568229	0.57538	0.562271
Ssb	0.568199	0.467575	0.652053
Adcy4	0.56782	0.667424	0.484816
4931406P16Rik	0.567747	0.283157	0.804905
Eps15l1	0.567505	0.583448	0.55422
Ep400	0.567208	0.845171	0.335572
Trrap	0.567	0	1.0395
Mrpl20	0.566873	1.06803	0.149244
Serinc1	0.566337	0.661855	0.486738
Rfc3	0.566325	0.689352	0.463802
Prex2	0.566045	0.406195	0.699254
Ndufa6	0.566017	0.954077	0.242634
Wdr82	0.565918	0.657633	0.489489
Adar	0.565608	0.544881	0.58288
Lrch3	0.565499	0	1.03675
Il2rg	0.565288	0.661855	0.484816
Timm23	0.565287	0.395909	0.706436
Ash2l	0.565008	0.57538	0.556364
Gm2000	0.564742	0.529839	0.593827
Mef2a	0.56473	0.283157	0.799375
Ccser2	0.56473	0.283157	0.799375
Csad	0.564399	0.838991	0.335572
Orai1	0.564207	0.371325	0.724941
Arf6	0.563808	0.949216	0.242634
Jund	0.563531	0.652382	0.489489
Trnau1ap	0.563442	0	1.03298
Sik3	0.561711	0.944605	0.242634
Bag1	0.56088	1.23394	0
Csnk1e	0.560553	0.261723	0.809578
Smarca4	0.560478	0.676489	0.463802
Calcrl	0.560442	0.268115	0.804048
Vat1	0.560442	0.268115	0.804048
Rnpep	0.559599	0.667918	0.469332
Jtb	0.559599	0.667918	0.469332
Mycbp2	0.559253	0.822061	0.340246
Cnot1	0.558311	0.956247	0.226698
Grrp1	0.558095	0.640421	0.489489
Caprin1	0.557893	0.268115	0.799375
Ndufs7	0.557537	0.261723	0.804048
Tmed2	0.557327	1.22612	0
Rftn1	0.557202	0.755592	0.391877
Myh10	0.55714	1.04662	0.149244
Raly	0.556915	0.544881	0.566944
Bvht	0.556842	0.661855	0.469332
Ddost	0.556389	1.04496	0.149244
Odf2	0.556358	0.667424	0.463802
Ndufa12	0.55623	0.261723	0.801652
Jak1	0.556157	0.292223	0.776102
Nid2	0.555829	0.931663	0.242634
Taldo1	0.555312	1.04259	0.149244
Ptprk	0.554984	0.843495	0.314559
Atp5mpl	0.554812	0.664025	0.463802
Tram1	0.554751	0.395909	0.68712
Bex3	0.554596	0.663548	0.463802
Shank3	0.554274	0.814411	0.337494
Bet1l	0.554068	0.283157	0.779827
Ro60	0.553491	0.654483	0.469332
Rab1b	0.553284	0.755592	0.384695
Sltm	0.553226	0.814411	0.335572
Fmr1	0.55301	1.03753	0.149244
Rtf2	0.552775	0.57538	0.533939
Lamtor2	0.552583	0.812996	0.335572
Psmd3	0.552537	0.652382	0.469332
Samm50	0.552191	1.21482	0
Mrpl23	0.552154	0.923578	0.242634
Ube2q1	0.552079	0.837103	0.314559
Hmgn5	0.551851	0.520225	0.578206
Rhoc	0.55153	0	1.01114
Cs	0.551054	0.790461	0.351547
Mtmr6	0.550559	0.83376	0.314559
Triobp	0.550114	0.938213	0.226698
Cachd1	0.549731	0	1.00784
Nrbp1	0.549123	0.936034	0.226698
Ube2g1	0.549123	0.936034	0.226698
Coro1c	0.548842	0.551273	0.546816
Adprh	0.548331	1.20633	0
Zbtb7a	0.547807	0	1.00431
Ndufs6	0.547807	0	1.00431
Ndufa8	0.547582	0.932644	0.226698
Pgls	0.547257	1.02487	0.149244
Lamtor3	0.547025	0.553946	0.541257
Igfbp5	0.546921	1.20323	0
Tax1bp1	0.546267	0.57538	0.522006
Jup	0.546033	0.792977	0.340246
Ppp2r1a	0.545936	0.544881	0.546816
Stip1	0.545875	0.667424	0.444583
BC005537	0.54581	0.551273	0.541257
Mbnl2	0.545258	0	0.99964
B3gnt2	0.544759	0.529839	0.557193
Ccnd3	0.544759	0.529839	0.557193
Snrpc	0.544252	0.378698	0.682215
Ddx58	0.544177	0.292223	0.754139
Trim27	0.544177	0.292223	0.754139
Nfat5	0.543726	1.0171	0.149244
Rtn4	0.543726	1.0171	0.149244
Pgp	0.54342	0.501676	0.578206
Taf8	0.543388	0.790461	0.337494
Psmd6	0.543384	0.395909	0.666279
Arl1	0.543295	0.384267	0.675818
Psma2	0.543295	0.384267	0.675818
Thsd1	0.543243	0.724882	0.391877
Ssu72	0.543016	0.922598	0.226698
Stx12	0.542785	0.283157	0.759142
Ppp1r16b	0.542177	0.395909	0.664068
Slc7a1	0.541794	0.384267	0.673067
Atraid	0.541728	0.283157	0.757203
Gmfb	0.541728	0.283157	0.757203
Ripor1	0.541487	0.769415	0.351547
Fis1	0.541121	0.812996	0.314559
Tmem223	0.540339	0.897585	0.242634
Il2	0.540206	0	0.990377
Aplp2	0.539809	0.784892	0.335572
Stox2	0.538912	0.544881	0.533939
Ndufa7	0.538912	0.544881	0.533939
Mrpl17	0.538776	0.802104	0.319337
Fzd4	0.538091	0.384267	0.666279
Samd1	0.538091	0.384267	0.666279
Snap23	0.537683	0.774607	0.340246
Impdh2	0.537683	0.774607	0.340246
Chkb	0.537665	0.780176	0.335572
Mpc2	0.537412	0.371325	0.675818
Armc10	0.537412	0.371325	0.675818
Cdca4	0.53707	1.00246	0.149244
Bcar1	0.536885	0.384267	0.664068
Tgfb2	0.53671	0.8896	0.242634
Ssr1	0.536208	0.441724	0.614945
Farp2	0.535309	0.551273	0.522006
Fam117b	0.535172	0	0.981149
Ndufb7	0.533577	1.17387	0
Sec13	0.532938	0.384267	0.656831
Dop1b	0.532814	0.478344	0.578206
Cfdp1	0.532075	0.529839	0.533939
Tbc1d9b	0.532075	0.529839	0.533939
Col4a3bp	0.531003	0.371325	0.664068
Pde4b	0.530395	0.406195	0.633895
Arhgap1	0.529849	0	0.97139
Pcmtd1	0.529619	0.292223	0.72745
Strn3	0.529619	0.292223	0.72745
Mea1	0.529619	0.292223	0.72745
Slc43a3	0.528531	0.57538	0.489489
Cebpd	0.528251	0.292223	0.724941
Cct6a	0.528048	0.283157	0.732123
Swap70	0.528048	0.283157	0.732123
Oga	0.528048	0.283157	0.732123
Sft2d1	0.527768	0	0.967575
Maea	0.527714	0.292223	0.723956
Fbxl6	0.526049	0.822061	0.279373
Sar1b	0.526	0.507691	0.541257
Foxk1	0.525981	0.57538	0.484816
Mga	0.525499	0.283157	0.72745
Hpf1	0.525219	0	0.962901
Smtn	0.525219	0	0.962901
Crip1	0.524888	0.746459	0.340246
Rab12	0.524283	0.384267	0.640963
Mib1	0.523968	0.652382	0.416957
Rbmx	0.52341	1.1515	0
Rrbp1	0.523401	0.371325	0.650131
Ano6	0.523176	0.689352	0.384695
Nelfb	0.522629	0.283157	0.722189
Ttn	0.522427	0.268115	0.734353
Mrfap1	0.521929	0.812996	0.279373
Ndufs3	0.521693	0.560338	0.489489
Atp6v0b	0.521693	0.560338	0.489489
Atf7ip	0.521311	0.769415	0.314559
Ndfip1	0.521203	0.583448	0.469332
Prrc1	0.520572	0.283157	0.718418
Ddx6	0.520256	0.67431	0.391877
Cdv3	0.519076	0	0.951639
Cct3	0.518715	0.67092	0.391877
Sbno1	0.5184	0.371325	0.640963
Pdha1	0.518379	0.762964	0.314559
Kbtbd11	0.518272	1.1402	0
Tcf7l2	0.518121	0.406195	0.611393
Actn1	0.517608	0.959646	0.149244
Grpel1	0.517573	0.551273	0.489489
Ikzf5	0.517573	0.551273	0.489489
Lman2	0.517573	0.551273	0.489489
Gpat4	0.517536	0.57538	0.469332
Gnl2	0.517329	0.676489	0.384695
Etf1	0.517329	0.676489	0.384695
Scp2	0.517293	0.268115	0.724941
Glod4	0.517293	0.268115	0.724941
Plekho1	0.517287	0.553946	0.486738
Arrb1	0.517126	0.667424	0.391877
Mxra7	0.517126	0.667424	0.391877
Mef2c	0.516846	0.292223	0.704032
Jkamp	0.516527	0	0.946966
Smap2	0.516239	0.553946	0.484816
Rnaset2a	0.516239	0.553946	0.484816
Sqstm1	0.516063	0.956247	0.149244
Adh5	0.516063	0.732651	0.335572
Zfp318	0.515792	0.268115	0.722189
Ppm1a	0.515749	0.86261	0.226698
Kdm2a	0.515749	0.86261	0.226698
Rnf216	0.515393	0.954773	0.149244
Fxyd5	0.515364	0.663548	0.391877
Tirap	0.515024	0.551273	0.484816
Erp29	0.514744	0.268115	0.720267
Smarcb1	0.514744	0.268115	0.720267
Nme1	0.514667	0.544881	0.489489
Ybx3	0.514594	0.661855	0.391877
A430106G13Rik	0.514519	0.57538	0.463802
Etl4	0.514387	0.261723	0.724941
Grk5	0.514315	0.378698	0.627329
Slc12a2	0.51424	0.292223	0.699254
Mettl9	0.514037	0.283157	0.706436
Romo1	0.513966	1.13073	0
Brpf1	0.513757	0	0.941888
Tasor	0.513757	0	0.941888
Hipk3	0.513446	0.395909	0.611393
Tead1	0.512847	0.837103	0.242634
Usp3	0.512847	0.837103	0.242634
Trp53i11	0.512829	0.792977	0.279373
Mier1	0.51266	0.478344	0.541257
Lsm4	0.511838	0.261723	0.720267
Syncrip	0.511243	0.654483	0.391877
Cpsf7	0.510771	0.944605	0.149244
Clcn4	0.510698	0.560338	0.469332
Etv3	0.510677	0.661855	0.384695
Fbxw8	0.510289	0.652382	0.391877
Npepps	0.510119	0.283157	0.699254
Sgms1	0.508668	0.478344	0.533939
Dnajb6	0.508529	1.11876	0
Erp44	0.508524	0.283157	0.69633
Plpp1	0.508279	1.11821	0
Uqcrh	0.507866	0.938213	0.149244
Tnfsf10	0.507822	0.845171	0.226698
Ubl3	0.507621	0.292223	0.68712
Snrpa	0.507621	0.292223	0.68712
Sppl2a	0.507326	0.654483	0.384695
Akt1	0.507199	0.268115	0.706436
Srsf6	0.507061	0.843495	0.226698
Gbp7	0.506766	0	0.92907
Guk1	0.506651	0.935539	0.149244
Phpt1	0.505811	0.406195	0.588824
Dctn4	0.505065	0	0.925952
Tecr	0.504852	0.640421	0.391877
Rab18	0.504852	0.640421	0.391877
Srsf5	0.504777	0.553946	0.463802
Arf5	0.504479	0.774607	0.279373
Btbd3	0.504294	0.261723	0.706436
Yif1b	0.504294	0.261723	0.706436
Grina	0.504209	0.371325	0.614945
Pfdn5	0.504209	0.371325	0.614945
Ube2m	0.504158	1.10915	0
Txndc17	0.504155	0.837103	0.226698
Klf10	0.503773	0.467575	0.533939
Adipor1	0.503745	0.929147	0.149244
Dcp2	0.503745	0.929147	0.149244
Cycs	0.503672	0.544881	0.469332
Rab10	0.503562	0.551273	0.463802
Dad1	0.503562	0.551273	0.463802
Timm10b	0.502635	0.83376	0.226698
Cetn3	0.502579	0.449494	0.546816
Ktn1	0.502568	0.406195	0.58288
Rbm7	0.502505	0.292223	0.67774
Ralb	0.5022	0.925748	0.149244
Dhx40	0.501457	0.292223	0.675818
Ccnt1	0.501214	0.923578	0.149244
Rab6a	0.501128	0.767234	0.279373
Fkbp8	0.500934	0.640421	0.384695
Hnrnpul2	0.500911	0.520225	0.484816
Smc1a	0.500656	0.544881	0.463802
Afg3l1	0.500376	0.261723	0.699254
Slc40a1	0.500232	0.921419	0.149244
Myo1c	0.500019	0.406195	0.578206
Sinhcaf	0.499187	0.762964	0.279373
Ube2a	0.499104	0.825991	0.226698
Tmed9	0.497551	0.91552	0.149244
Cxxc5	0.497551	0.91552	0.149244
Atp11b	0.497336	0.283157	0.675818
Pcf11	0.497336	0.283157	0.675818
Rnf7	0.497336	0.283157	0.675818
C1qtnf6	0.497336	0.283157	0.675818
Synj1	0.497336	0.283157	0.675818
Add3	0.497321	1.09411	0
Cbfa2t3	0.497318	0.822061	0.226698
Rnf215	0.497199	0.560338	0.444583
Ndufb10	0.496908	0.914105	0.149244
Smarca2	0.496717	0.268115	0.687217
Anapc1	0.496381	0.689352	0.335572
Rcor1	0.496253	0.292223	0.666279
Ube2k	0.496234	0.378698	0.594181
Cpsf1	0.495835	0.283157	0.673067
Uck2	0.495827	0.688132	0.335572
Alkbh6	0.495827	0.688132	0.335572
Clpb	0.495827	0.688132	0.335572
Lpar6	0.495827	0.688132	0.335572
Nrp1	0.495676	0	0.90874
AC149090.1	0.495047	0.292223	0.664068
Tulp4	0.494425	0	0.906446
Gm13889	0.493819	0.529839	0.463802
Smndc1	0.492924	0	0.903695
Rgl1	0.492605	0.292223	0.659591
Slc35b4	0.492601	0.384267	0.58288
Selenoh	0.492133	0.9036	0.149244
Tpp2	0.491888	0.57538	0.422312
Pbrm1	0.491876	0	0.901773
Gsk3b	0.491113	0.268115	0.676945
Syne2	0.490781	0	0.899765
Mrpl4	0.490499	0.268115	0.675818
Hdgf	0.49035	0.551273	0.439581
Elovl7	0.489995	0.292223	0.654805
Psme1	0.489995	0.292223	0.654805
Elp3	0.489995	0.292223	0.654805
Ppp1r13b	0.489512	0	0.897438
Nedd9	0.489512	0	0.897438
Psma5	0.488967	0.57538	0.416957
Gabarapl1	0.488557	0.406195	0.557193
Rbm5	0.488485	0.283157	0.659591
Furin	0.488246	0.802104	0.226698
Tulp3	0.488008	1.07362	0
Fam193a	0.488003	0.67092	0.335572
Ap2a2	0.487593	0.261723	0.675818
Mrpl33	0.487444	0.544881	0.439581
Ncstn	0.487418	0.664025	0.340246
Lmnb1	0.487418	0.664025	0.340246
Plxna2	0.486963	0	0.892765
Etv6	0.486652	0.395909	0.562271
Uri1	0.486414	0.667424	0.335572
Mybbp1a	0.486414	0.667424	0.335572
Mmp2	0.486093	0.261723	0.673067
Rsrp1	0.485917	0.664025	0.337494
Clk2	0.485874	0.283157	0.654805
Zfp871	0.485874	0.283157	0.654805
Rnf14	0.485874	0.283157	0.654805
Trp53	0.485764	0.77752	0.242634
Pum1	0.484985	0.775807	0.242634
Piezo2	0.484919	0.689352	0.314559
Ubn2	0.484869	0.664025	0.335572
Lias	0.484652	0.663548	0.335572
Pmepa1	0.484551	0.283157	0.652379
Hectd1	0.484551	0.283157	0.652379
Map2k3	0.48444	0.774607	0.242634
Trim8	0.484423	0.478344	0.489489
Slu7	0.484373	0.283157	0.652053
Nt5dc2	0.484365	0.688132	0.314559
Rcc2	0.48417	0.371325	0.578206
Fam162a	0.483909	0.384267	0.566944
Golph3	0.483882	0.395909	0.557193
Fermt2	0.483558	1.06383	0
Zc3h18	0.483325	0.283157	0.650131
Chmp2b	0.48313	0.790849	0.226698
Rassf2	0.483081	0.654483	0.340246
2900026A02Rik	0.482954	0.790461	0.226698
Prpf8	0.482445	0.292223	0.640963
Slc30a5	0.482408	0.384267	0.564193
Pon2	0.48239	0.261723	0.666279
Sept10	0.48208	0.769415	0.242634
Gls	0.481962	0	0.883597
Sipa1l1	0.481196	0.384267	0.56197
Ubn1	0.481184	0.261723	0.664068
Scand1	0.481171	1.05858	0
Dnaja2	0.481089	0.767234	0.242634
Plcg1	0.480959	0.879017	0.149244
Surf4	0.48082	0	0.881503
Npdc1	0.480532	0.654483	0.335572
Mex3a	0.480532	0.654483	0.335572
Nono	0.480396	0.784833	0.226698
Rfk	0.47963	1.05519	0
Dtx3	0.479319	0	0.878751
Pxdn	0.479225	0.553946	0.416957
Gm37494	0.47922	0.64599	0.340246
Map1lc3a	0.479072	0.676489	0.314559
Hmgb3	0.479072	0.676489	0.314559
Stk39	0.479037	0.268115	0.654805
Cdc37	0.478828	0.378698	0.562271
Shroom2	0.478828	0.378698	0.562271
Rabif	0.478793	0.874253	0.149244
Fam13c	0.47859	0.384267	0.557193
Ndufa10	0.478266	1.05218	0
Insr	0.478107	0	0.876529
Fam43a	0.477783	0.667918	0.319337
Usp46	0.47772	0.64599	0.337494
Rnf10	0.477558	0.667424	0.319337
Cacybp	0.476979	0.467575	0.484816
Rexo2	0.476671	0.64599	0.335572
Azin1	0.476526	0.371325	0.564193
Dhx36	0.476496	1.04829	0
5430405H02Rik	0.476244	0.639441	0.340246
Peak1	0.476244	0.639441	0.340246
Khsrp	0.476013	0.664025	0.319337
Frmd4b	0.475747	0.774607	0.226698
Casp8ap2	0.475525	0	0.871796
Tnnt2	0.47551	1.04612	0
Golm1	0.475327	0	0.871433
Coro2b	0.47519	0.395909	0.541257
Dek	0.47519	0.395909	0.541257
Tle1	0.475008	0.292223	0.627329
Wsb2	0.475008	0.292223	0.627329
Nudt21	0.475008	0.292223	0.627329
Sun2	0.475008	0.292223	0.627329
Tnni1	0.474952	0.667424	0.314559
Dpf2	0.474952	0.667424	0.314559
Slco1a4	0.474631	0.261723	0.652053
Ccn2	0.474631	0.261723	0.652053
Rpf1	0.474279	0	0.869511
Comt	0.473582	0.261723	0.650131
Diaph2	0.473582	0.261723	0.650131
Nsf	0.473407	0.664025	0.314559
Bhlhe40	0.47293	0.384267	0.546816
Ubald2	0.472396	0.767234	0.226698
Cfl2	0.47137	0.57538	0.384695
Ccdc88c	0.47137	0.57538	0.384695
Gusb	0.471051	0	0.863593
Mmd	0.470887	0.283157	0.627329
4833439L19Rik	0.470887	0.283157	0.627329
Mydgf	0.470802	0.292223	0.619618
Ubl5	0.469627	1.03318	0
Sh3glb2	0.469365	0.406195	0.522006
Relch	0.46907	0.654483	0.314559
Golgb1	0.46907	0.654483	0.314559
Pltp	0.46876	0.449494	0.484816
Brd4	0.46874	0.740067	0.242634
Tmed5	0.468581	0.261723	0.640963
Dnajb1	0.468581	0.261723	0.640963
Fam168b	0.46845	0.560338	0.391877
Nfkb1	0.46845	0.560338	0.391877
Abce1	0.46845	0.560338	0.391877
Mrpl13	0.468115	0.652382	0.314559
Acat1	0.468007	1.02962	0
Idh3g	0.466682	0.283157	0.619618
Arhgef2	0.465906	0.384267	0.533939
Jpt1	0.465906	0.384267	0.533939
Pura	0.465906	0.384267	0.533939
S100a10	0.465852	1.02487	0
Lbr	0.465833	0	0.854027
Ube3a	0.465833	0	0.854027
Adgrl1	0.465833	0	0.854027
Txndc15	0.46568	0.845403	0.149244
Manbal	0.465574	0.845171	0.149244
Ppp3ca	0.465545	0.553946	0.391877
Ssr4	0.465545	0.553946	0.391877
Lsr	0.465322	1.02371	0
Clip1	0.465209	0.64599	0.314559
Parva	0.465172	0.688132	0.279373
Tomm34	0.464813	0.843495	0.149244
Ssr2	0.464813	0.843495	0.149244
Slc35b1	0.464813	0.843495	0.149244
Sfr1	0.464689	0.395909	0.522006
Atp5g1	0.464132	0.283157	0.614945
Atp5k	0.46405	0.268115	0.627329
Elf1	0.464015	0.371325	0.541257
Maged2	0.462817	0	0.848497
Ik	0.462254	1.01696	0
Btbd9	0.462232	0.639441	0.314559
Sae1	0.462195	0.283157	0.611393
Nras	0.461907	0.837103	0.149244
Esyt1	0.461907	0.837103	0.149244
F2r	0.461907	0.837103	0.149244
Ndst1	0.461907	0.837103	0.149244
Strbp	0.461627	0.553946	0.384695
Ralgapb	0.461627	0.553946	0.384695
Pfdn2	0.461424	0.544881	0.391877
Pdia6	0.461424	0.544881	0.391877
Mpc1	0.461424	0.544881	0.391877
Hnrnph2	0.461424	0.544881	0.391877
Nip7	0.461145	0.261723	0.627329
Cdk9	0.460412	0.551273	0.384695
M6pr	0.460412	0.551273	0.384695
1700123O20Rik	0.460412	0.551273	0.384695
Pcna	0.460048	0.740067	0.226698
Fam160b1	0.460023	0.371325	0.533939
Mff	0.459397	0.384267	0.522006
Grk6	0.45889	0.67431	0.279373
Stk38	0.458265	1.00818	0
Cdc73	0.4582	0.507691	0.416957
Farsb	0.457298	0.449494	0.463802
Lnpep	0.457295	0.268115	0.614945
Arl4a	0.457266	0.733947	0.226698
Slc38a6	0.4572	0.478344	0.439581
Cd47	0.4572	0.478344	0.439581
Psmc2	0.456939	0.261723	0.619618
Epm2aip1	0.456856	0.825991	0.149244
Srsf10	0.456791	0.292223	0.593931
Car2	0.456629	0	0.837153
Rnf111	0.456251	0	0.836461
Psme4	0.455358	0.268115	0.611393
Kif1c	0.45507	0.822061	0.149244
Mrps16	0.45507	0.822061	0.149244
Camkk2	0.45439	0.261723	0.614945
Bzw1	0.454214	0.664025	0.279373
Brk1	0.454144	0.544881	0.378529
Mia2	0.454005	0.292223	0.588824
Hmg20b	0.453515	0.371325	0.522006
Crtap	0.452971	0.534902	0.384695
Kars	0.452452	0.261723	0.611393
Ier3ip1	0.452452	0.261723	0.611393
Tmem100	0.452334	0	0.829278
Gimap8	0.452298	0	0.829214
Itih5	0.451988	0.994374	0
Slc25a51	0.451988	0.994374	0
Anxa6	0.451628	0.406195	0.489489
Ago1	0.45125	0	0.827292
Sh3d19	0.451082	0	0.826984
Wdr83os	0.450949	0.812996	0.149244
Nol7	0.450949	0.812996	0.149244
Lyn	0.450763	0.292223	0.58288
Cwc15	0.450763	0.292223	0.58288
Map2k1	0.450763	0.292223	0.58288
Pald1	0.450763	0.292223	0.58288
Farp1	0.450763	0.292223	0.58288
Dtymk	0.450669	0.529839	0.384695
Pxk	0.450127	0.406195	0.486738
Prrc2c	0.450034	0	0.825062
Rgl2	0.450034	0	0.825062
Ganab	0.450034	0	0.825062
Srp72	0.449877	0.654483	0.279373
Setd1b	0.449079	0.406195	0.484816
Xbp1	0.449079	0.406195	0.484816
Agrn	0.448971	0	0.823113
H13	0.448214	0.292223	0.578206
Sirt2	0.448214	0.292223	0.578206
Fam126a	0.447125	0.57538	0.340246
Tanc2	0.447125	0.57538	0.340246
Lama5	0.446642	0.283157	0.58288
Nabp2	0.446642	0.283157	0.58288
Isca1	0.446642	0.283157	0.58288
Pcyox1	0.446573	0.378698	0.503136
Arhgap5	0.445862	0	0.817413
Mbnl1	0.445688	0.689352	0.242634
Pnp	0.445624	0.57538	0.337494
Bcor	0.44486	0.478344	0.416957
Safb2	0.444576	0.57538	0.335572
Vdac1	0.444404	0.395909	0.484816
Tmem222	0.443048	0.268115	0.588824
Tpra1	0.44304	0.639441	0.279373
Rbbp6	0.442928	0.261723	0.593931
Dram2	0.442871	0.261723	0.593827
Sumo3	0.441665	0.292223	0.5662
Nol11	0.441665	0.292223	0.5662
Btg2	0.441588	0	0.809578
Dhx15	0.441588	0	0.809578
Gtpbp4	0.441588	0	0.809578
Clns1a	0.441182	0	0.808834
Tars	0.440882	0.790849	0.149244
Cyb5r3	0.440288	0.560338	0.340246
Ptprs	0.440142	0.261723	0.588824
Zfp36l2	0.440142	0.261723	0.588824
Dnlz	0.439841	0.676489	0.242634
Fam98b	0.439841	0.676489	0.242634
Chmp5	0.439522	0.292223	0.562271
Srsf3	0.439522	0.292223	0.562271
Ube2e3	0.439358	0.292223	0.56197
Lmbrd1	0.439112	0.384267	0.484816
Coa3	0.439112	0.384267	0.484816
Zdhhc18	0.439039	0	0.804905
Ccnk	0.439039	0	0.804905
Git1	0.43885	0.67431	0.242634
Nkap	0.43885	0.67431	0.242634
Csnk2a1	0.438787	0.560338	0.337494
Tpst1	0.438572	0	0.804048
Lhfpl2	0.438572	0	0.804048
Cnpy2	0.438148	0.784833	0.149244
Tcf3	0.43795	0.283157	0.566944
Fam222b	0.437739	0.560338	0.335572
Zfp638	0.437617	0.406195	0.463802
St13	0.437382	0.553946	0.340246
Nrd1	0.437256	0.268115	0.578206
B230219D22Rik	0.437256	0.268115	0.578206
Amotl2	0.437071	0	0.801297
Ndufa2	0.4369	0.261723	0.58288
Hmgcl	0.436752	0.292223	0.557193
Scamp2	0.436752	0.292223	0.557193
Pcdh12	0.436752	0.292223	0.557193
Oip5os1	0.43658	0.378698	0.484816
Fam168a	0.43658	0.378698	0.484816
Ggnbp2	0.43658	0.378698	0.484816
AU021092	0.43658	0.378698	0.484816
Sec61b	0.436449	0.283157	0.564193
Tgfb1i1	0.436449	0.283157	0.564193
Sept7	0.436449	0.283157	0.564193
Akap12	0.436449	0.283157	0.564193
Smarcd1	0.436449	0.283157	0.564193
Hcfc1	0.436449	0.283157	0.564193
Heyl	0.436203	0.959646	0
Cenpa	0.436203	0.959646	0
Pdhb	0.436203	0.959646	0
Dpysl2	0.436203	0.959646	0
Mtch2	0.436023	0	0.799375
Trim35	0.435945	0.667918	0.242634
Mpnd	0.435881	0.553946	0.337494
Park7	0.435779	0.371325	0.489489
Dusp22	0.435779	0.371325	0.489489
Cd59a	0.43572	0.667424	0.242634
Cic	0.43572	0.667424	0.242634
Atl2	0.43572	0.667424	0.242634
Zfp445	0.435401	0.283157	0.562271
Gjc1	0.435401	0.283157	0.562271
Psmc6	0.435401	0.283157	0.562271
Larp4	0.435401	0.283157	0.562271
Nr2f2	0.435213	0.957468	0
Ndfip2	0.435213	0.957468	0
Gmpr2	0.434833	0.553946	0.335572
Mtss1	0.434833	0.553946	0.335572
Zfp91	0.434658	0.956247	0
Rgs19	0.434351	0.261723	0.578206
Commd8	0.434351	0.261723	0.578206
Dph6	0.433958	0.663548	0.242634
Afdn	0.433958	0.663548	0.242634
Mycbp	0.433672	0.954077	0
Usp34	0.433672	0.954077	0
Cbx6	0.433672	0.954077	0
Zeb1	0.433672	0.954077	0
Bace1	0.433618	0.551273	0.335572
Metap2	0.433618	0.551273	0.335572
Gm13075	0.433262	0.544881	0.340246
Snx1	0.433262	0.544881	0.340246
Btbd1	0.433189	0.661855	0.242634
Atp6v0e	0.433189	0.661855	0.242634
Timm44	0.433114	0.57538	0.314559
Rnf11	0.432942	0.395909	0.463802
Cops7a	0.432942	0.395909	0.463802
Clta	0.432631	0.283157	0.557193
Capn7	0.432631	0.283157	0.557193
Olfml2a	0.432307	0.951076	0
Ppp1cb	0.431752	0.949855	0
Nt5dc3	0.43127	0.657633	0.242634
Sdhaf2	0.43127	0.657633	0.242634
Ube2b	0.43118	0.478344	0.391877
Gatad2a	0.431149	0.676489	0.226698
Tpgs1	0.431149	0.676489	0.226698
Pds5b	0.431113	0.268115	0.566944
Emd	0.431113	0.268115	0.566944
Cdk17	0.430666	0.384267	0.469332
Tgoln1	0.430321	0.946705	0
Uqcrc2	0.430158	0.67431	0.226698
Erlec1	0.430158	0.67431	0.226698
Ndufa13	0.429838	0.654483	0.242634
Eif4ebp2	0.429612	0.268115	0.564193
Tbca	0.429612	0.268115	0.564193
Uqcrb	0.429392	0.467575	0.397572
Pik3c2b	0.429366	0.944605	0
Arid1b	0.428883	0.652382	0.242634
Gnaq	0.428883	0.560338	0.319337
Trps1	0.428617	0.67092	0.226698
Lamtor1	0.428207	0.261723	0.566944
Ipo11	0.428207	0.261723	0.566944
Pggt1b	0.428207	0.261723	0.566944
Gnb4	0.428059	0.292223	0.541257
Kmt2a	0.428059	0.292223	0.541257
Dubr	0.428059	0.292223	0.541257
Gabarapl2	0.427802	0.261723	0.5662
Msmo1	0.42765	0.384267	0.463802
Wdr33	0.42765	0.384267	0.463802
Gab1	0.427577	0	0.783891
Ogt	0.427577	0	0.783891
Yipf3	0.427263	0.478344	0.384695
Ap2s1	0.427253	0.667918	0.226698
Utp15	0.427253	0.667918	0.226698
Tomm70a	0.427253	0.667918	0.226698
Polr2m	0.427028	0.667424	0.226698
Fam167b	0.426971	0.283157	0.546816
Cd164	0.426707	0.261723	0.564193
Twsg1	0.426425	0.529839	0.340246
Gpi1	0.426277	0.560338	0.314559
Hunk	0.426277	0.560338	0.314559
Ndufab1	0.425978	0.64599	0.242634
Spag5	0.425978	0.64599	0.242634
Zfp503	0.425977	0.553946	0.319337
Ifnar2	0.425794	0.268115	0.557193
Stx3	0.425794	0.268115	0.557193
Tspan5	0.425658	0.261723	0.562271
Eif3k	0.425658	0.261723	0.562271
Psme2	0.425658	0.261723	0.562271
Fundc2	0.425658	0.261723	0.562271
Luc7l2	0.425567	0.531253	0.337494
Stk25	0.425495	0.261723	0.56197
Mospd3	0.42547	0.936034	0
Baz2b	0.425245	0.935539	0
Nars	0.425245	0.935539	0
Ndufb2	0.424924	0.529839	0.337494
Pcdh1	0.424924	0.529839	0.337494
Czib	0.424856	0.755592	0.149244
Nsd2	0.424856	0.755592	0.149244
Trappc1	0.424856	0.755592	0.149244
Snhg8	0.424784	0.371325	0.469332
Spcs1	0.424762	0.551273	0.319337
Stard8	0.424762	0.551273	0.319337
Cers2	0.424068	0.292223	0.533939
Hook3	0.424068	0.292223	0.533939
Ostm1	0.424068	0.292223	0.533939
Ccdc47	0.424068	0.292223	0.533939
Cdk2	0.423939	0.283157	0.541257
Atxn2	0.423929	0.932644	0
Ulk4	0.423859	0	0.777075
Sdc3	0.423585	0	0.776572
Numa1	0.423585	0	0.776572
Spry1	0.423371	0.553946	0.314559
Snhg14	0.423371	0.553946	0.314559
Glud1	0.423371	0.553946	0.314559
Tet3	0.422888	0.261723	0.557193
Piezo1	0.422888	0.261723	0.557193
Nudt4	0.422888	0.261723	0.557193
Trip11	0.422888	0.261723	0.557193
Gdi1	0.422888	0.261723	0.557193
Lima1	0.422459	0.395909	0.444583
C1qbp	0.42234	0.929147	0
Kif1b	0.422325	0.750023	0.149244
Tfpi	0.421767	0.371325	0.463802
Dennd5b	0.421767	0.371325	0.463802
Slc25a39	0.421767	0.371325	0.463802
Rock2	0.421146	0.654483	0.226698
Manf	0.420705	0.746459	0.149244
Cir1	0.419947	0.283157	0.533939
Pisd	0.419947	0.283157	0.533939
Ephb4	0.419947	0.283157	0.533939
Chp1	0.419363	0.922598	0
Copb1	0.419251	0.544881	0.314559
Tbl1x	0.419251	0.544881	0.314559
Msl1	0.418405	0.543022	0.314559
Cldnd1	0.418067	0.449494	0.391877
Selenon	0.417285	0.64599	0.226698
4833403J16Rik	0.417285	0.64599	0.226698
Vamp5	0.417285	0.64599	0.226698
9530068E07Rik	0.417285	0.64599	0.226698
Xiap	0.417285	0.64599	0.226698
Plekhg5	0.417102	0.268115	0.541257
E2f4	0.417102	0.268115	0.541257
Sox17	0.415502	0.914105	0
Camk2n1	0.415502	0.914105	0
Qsox1	0.415403	0.913886	0
Baz2a	0.415403	0.913886	0
Add1	0.415018	0.733947	0.149244
Fam120a	0.415018	0.733947	0.149244
Idh3b	0.414754	0.640421	0.226698
Gltp	0.414535	0.441724	0.391877
Rpl35	0.414308	0.639441	0.226698
Nrp2	0.414196	0.261723	0.541257
Hells	0.414196	0.261723	0.541257
Hdac2	0.413921	0.57538	0.279373
Gga2	0.413808	0.507691	0.335572
Hmga2	0.41311	0.268115	0.533939
Virma	0.412413	0.529839	0.314559
Mbd1	0.412065	0.406195	0.416957
Mapk3	0.411907	0.378698	0.439581
Psmd4	0.411349	0	0.754139
Ndufa3	0.411074	0.501676	0.335572
Rp9	0.411074	0.501676	0.335572
Txnl1	0.41065	0.520225	0.319337
Lmtk2	0.410471	0	0.752529
Pa2g4	0.410471	0	0.752529
Ccz1	0.410204	0.261723	0.533939
Zfhx3	0.410204	0.261723	0.533939
Hjurp	0.409994	0.493691	0.340246
Gtpbp2	0.409084	0.899985	0
Ccnt2	0.408556	0.371325	0.439581
Pcif1	0.408556	0.371325	0.439581
Ccng1	0.407266	0.292223	0.503136
Atp1b2	0.407084	0.560338	0.279373
Arhgef3	0.407084	0.560338	0.279373
Lgals1	0.404894	0.890767	0
Sirt7	0.404686	0.711217	0.149244
Ppp4c	0.404179	0.553946	0.279373
Bahd1	0.403696	0.261723	0.522006
Ezr	0.403018	0.478344	0.340246
Ptprm	0.403018	0.478344	0.340246
Gne	0.402904	0.886389	0
Mapk1ip1	0.401587	0	0.736242
Itga9	0.401039	0.292223	0.491719
Adam17	0.400556	0	0.734353
Acad8	0.400468	0.478344	0.335572
Zfas1	0.400058	0.544881	0.279373
Cct5	0.400058	0.544881	0.279373
Gbf1	0.400058	0.544881	0.279373
Ppp6c	0.399897	0	0.733145
Rap1gds1	0.399823	0.292223	0.489489
Gja4	0.399612	0.501676	0.314559
Adnp	0.399553	0.879017	0
Gm15270	0.399072	0.877958	0
Nenf	0.398322	0.292223	0.486738
Psma4	0.398322	0.292223	0.486738
Cnot6	0.398322	0.292223	0.486738
Man1a	0.398032	0.87567	0
Psmc3	0.397388	0.874253	0
Trpc4ap	0.397274	0.292223	0.484816
Irf2bp1	0.397274	0.292223	0.484816
Tmem208	0.397274	0.292223	0.484816
Sms	0.396918	0.283157	0.491719
Jag2	0.396197	0.261723	0.508259
Gtf2a2	0.395702	0.283157	0.489489
Crlf3	0.395702	0.283157	0.489489
Daam2	0.395702	0.283157	0.489489
Alg6	0.395422	0	0.724941
Hdgfl3	0.395422	0	0.724941
Gm10715	0.395422	0	0.724941
Filip1	0.395422	0	0.724941
[truncated: 4,972 more rows]

## Sheet: DE genes EC
Table S2: Differentially expressed genes in P6 Gpr124 fl/fl vs Gpr124 ΔEC/ΔEC hyaloid endothelial cells. Fold change of mean log-normalized UMI counts (Gpr124 fl/fl vs Gpr124 ΔEC/ΔEC). Differential expression criteria: Absolute log2 fold change > 1 and p < 0.05. P, postnatal day; UMI, unique molecular identifier.
Gene	p-value	Log2 fold change
Rpl6	9.88678e-05	1.11033
Adprh	0.00215033	4.23233
Crebbp	0.00215033	4.50358
Dynlrb1	0.00215033	4.49366
Rap1a	0.00215033	4.68012
Get4	0.00215033	4.51739
Dag1	0.00215033	4.6632
Eif3m	0.00215033	5.3742
Tmcc1	0.00215033	5.30087
Ppp1ca	0.00215033	5.07169
Samm50	0.00215033	4.23148
Slc25a5	0.0022456	2.76914
Rpl11	0.00289148	1.25463
Gnas	0.00315131	1.13903
Eif3h	0.00336393	2.27797
Arpc1b	0.00390323	2.28028
Cox5b	0.00560049	1.85718
Cope	0.00654474	3.86091
Gngt2	0.00695365	3.40377
Tnpo3	0.00734249	3.75536
Anapc5	0.00741647	3.39158
Rab5c	0.00791097	3.578
Pbx1	0.00820304	3.24859
Slc39a1	0.00848484	1.7715
Atp5e	0.00904944	3.18802
Calm3	0.00929936	3.23361
Apcdd1	0.0115305	1.62292
Acsl3	0.0130609	3.53237
Cnot4	0.0130609	3.53237
Ahsa1	0.0130609	3.53237
Foxc1	0.0130609	3.53237
Ecpas	0.0130609	3.62083
D8Ertd738e	0.0130609	3.62083
Dync1li2	0.0130609	3.62083
Tysnd1	0.0130609	3.62083
Erbin	0.0130609	3.62083
Zfp961	0.0130609	3.56067
Faap100	0.0130609	3.56067
Fam171a1	0.0130609	3.60381
Dcaf17	0.0130609	3.60381
Abca3	0.0130609	3.60381
Vps52	0.0130609	3.60381
Nedd4l	0.0130609	3.60381
Kdm5c	0.0130609	3.60381
Bag1	0.0130609	4.73321
Hbb-bt	0.0130609	5.85644
Tgoln1	0.0130609	3.94477
Mycbp	0.0130609	3.97155
Usp34	0.0130609	3.97155
Cbx6	0.0130609	3.97155
Zeb1	0.0130609	3.97155
Heyl	0.0130609	3.9921
Cenpa	0.0130609	3.9921
Pdhb	0.0130609	3.9921
Dpysl2	0.0130609	3.9921
Chp1	0.0130609	3.88866
Hbb-bs	0.0130609	8.39997
Baz2b	0.0130609	3.93784
Nars	0.0130609	3.93784
Pik3c2b	0.0130609	3.95926
Rfk	0.0130609	4.24336
Sox17	0.0130609	3.88975
Camk2n1	0.0130609	3.88975
Atxn2	0.0130609	3.92459
C1qbp	0.0130609	3.92419
Zfp91	0.0130609	4.00412
Ubl5	0.0130609	4.18564
Nr2f2	0.0130609	4.02458
Ndfip2	0.0130609	4.02458
Tnnt2	0.0130609	4.22579
Ppp1cb	0.0130609	3.99109
Mospd3	0.0130609	3.97935
Olfml2a	0.0130609	4.01174
S100a10	0.0130609	4.25347
Tulp3	0.0130609	4.31365
Lsr	0.0130609	4.17505
Plpp1	0.0130609	4.45238
Dhx36	0.0130609	4.25315
Ube2m	0.0130609	4.4372
Scand1	0.0130609	4.28743
Itih5	0.0130609	4.19703
Slc25a51	0.0130609	4.19703
Ndufa10	0.0130609	4.27673
Fermt2	0.0130609	4.31284
Acat1	0.0130609	4.3397
Kbtbd11	0.0130609	4.56275
Add3	0.0130609	4.41314
Stk38	0.0130609	4.30345
Igfbp5	0.0130609	4.7326
Romo1	0.0130609	4.55461
Dnajb6	0.0130609	4.53175
Ndufb7	0.0130609	4.98358
Anks1	0.0130609	5.06071
Tmed2	0.0130609	5.4318
Rbmx	0.0130609	4.47027
Rpl14	0.0140672	1.85216
Atp5j	0.0144818	1.73253
Cox4i1	0.0150127	1.56199
Wnk1	0.0154798	3.18911
Rpl13a	0.016752	1.50626
Cdk4	0.0184142	1.43133
Rap1b	0.0188062	2.56384
Atp5j2	0.0191689	2.58317
Serf2	0.0192345	2.69523
Traf7	0.0214946	2.7464
Psmb4	0.0216981	2.4033
G3bp1	0.0224081	2.7265
Rps27a	0.0226303	1.67281
Ubb	0.0245845	1.27535
Rpl35a	0.0252491	1.35277
Rpl22	0.0255274	1.0285
Tmsb10	0.0258241	1.01675
Atp5a1	0.0262532	1.54011
Unc45b	0.0270369	2.4252
Ndufc2	0.0281705	2.74904
Esd	0.0295183	2.11435
Btf3	0.0316872	1.64857
Arhgap29	0.0323549	1.69252
Ftl1-ps1	0.0338499	3.78095
Ncl	0.035593	2.63562
Hba-a2	0.0363379	5.69818
Gclm	0.0370259	1.09935
Hba-a1	0.0383707	5.10998
Fkbp1a	0.0386284	1.71045
Npm1	0.0401688	1.20815
Tnks2	0.041319	1.99698
Copb2	0.0430443	3.33338
Rrp1	0.043053	1.76326
Capzb	0.0430677	3.79743
Rps2	0.0432501	1.13957
Sf3b5	0.0433145	3.27088
Ostf1	0.0434013	3.38034
Snrpb	0.0438094	2.09116
Wasf2	0.0441966	1.91974
Svbp	0.0453065	3.18703
Psmd8	0.0453303	3.12127
Zfp362	0.0454102	3.21073
Sfswap	0.0461677	1.78
Myh10	0.0473012	2.968
Atpif1	0.0473098	1.99191
Arid1a	0.0475406	2.11858
Rnf44	0.0481928	1.58227
Ftl1	0.0488072	1.87348
Pgls	0.0493693	2.96159
Nfat5	0.0495553	2.92848
Rtn4	0.0495553	2.92848
Mrpl20	0.0498458	3.20321
Mmrn2	0.000578294	-3.954
Elavl1	0.0017918	-4.7936
Prkab1	0.0017918	-5.14488
Sparcl1	0.009155	-1.92622
Pebp1	0.00920595	-4.67678
Smarce1	0.00920595	-4.08706
Ube2d2a	0.00920595	-4.3027
Pdap1	0.00920595	-4.5277
Sema6d	0.00920595	-4.83521
Atp2c1	0.00920595	-4.44098
Mecom	0.00920595	-4.44795
Mast4	0.00920595	-4.79168
Gna11	0.00920595	-4.79157
Eef1g	0.0107984	-1.24771
Epas1	0.0119744	-1.87778
Cd93	0.0162982	-1.03098
Atxn7l3b	0.0191145	-1.45413
Ablim1	0.0201726	-2.48657
Tns1	0.0209133	-3.35101
Flt1	0.0235943	-1.77933
Col4a1	0.0243857	-1.20615
Stx6	0.0275698	-2.24545
Col4a2	0.0292648	-1.171
Pdgfb	0.0296185	-1.36015
Ttc28	0.0314094	-2.54679
Rnf111	0.032476	-3.99551
Pbrm1	0.032476	-4.06904
Smndc1	0.032476	-4.07525
Tulp4	0.032476	-4.08422
Gab1	0.032476	-3.41354
Ogt	0.032476	-3.41354
Gbp7	0.032476	-4.20479
Casp8ap2	0.032476	-4.23151
Mbnl2	0.032476	-4.12173
Zdhhc18	0.032476	-3.51031
Ccnk	0.032476	-3.51031
Zbtb7a	0.032476	-4.13637
Ndufs6	0.032476	-4.13637
Insr	0.032476	-3.70816
Gls	0.032476	-4.31279
Btg2	0.032476	-3.53261
Dhx15	0.032476	-3.53261
Gtpbp4	0.032476	-3.53261
Plxna2	0.032476	-3.77072
Ppp1r13b	0.032476	-3.78936
Nedd9	0.032476	-3.78936
Cachd1	0.032476	-4.48134
Nrp1	0.032476	-3.8356
Dtx3	0.032476	-3.74368
Surf4	0.032476	-3.75496
Lbr	0.032476	-3.75852
Ube3a	0.032476	-3.75852
Adgrl1	0.032476	-3.75852
Brpf1	0.032476	-3.98077
Tasor	0.032476	-3.98077
Syne2	0.032476	-3.82118
Hpf1	0.032476	-4.04679
Smtn	0.032476	-4.04679
Sdf4	0.032476	-5.0682
Sft2d1	0.032476	-4.0622
Dctn4	0.032476	-3.95069
Jkamp	0.032476	-4.01807
Rhoc	0.032476	-4.24374
Cdv3	0.032476	-4.03378
Fam117b	0.032476	-4.17503
Trnau1ap	0.032476	-4.52413
Col5a2	0.032476	-3.24009
Spcs3	0.032476	-3.24009
Col1a1	0.032476	-3.24009
Mettl23	0.032476	-3.24009
Clptm1l	0.032476	-3.24009
Rpl7l1	0.032476	-3.24009
Npr3	0.032476	-4.92896
Mtch2	0.032476	-3.59885
Amotl2	0.032476	-3.60745
Tpst1	0.032476	-3.61983
Lhfpl2	0.032476	-3.61983
Arhgap1	0.032476	-3.98273
Sdc3	0.032476	-3.62375
Numa1	0.032476	-3.62375
Prss23	0.032476	-5.1978
Il2	0.032476	-4.04387
Prrc2c	0.032476	-3.70408
Rgl2	0.032476	-3.70408
Ganab	0.032476	-3.70408
Sh3d19	0.032476	-3.71207
Maged2	0.032476	-3.83342
Clns1a	0.032476	-3.81934
Lrch3	0.032476	-4.21164
Trrap	0.032476	-4.2198
Clic4	0.032476	-5.12324
Rpf1	0.032476	-3.90637
Golm1	0.032476	-3.91331
Cox8a	0.0350454	-2.29005
Cdh5	0.0415624	-1.53896
Bgn	0.0455222	-3.35759
Apbb2	0.0464378	-2.47514
Nova2	0.0475279	-3.16034
Vwf	0.0487489	-3.52148
Lcp1	0.0490844	-1.64016
Fmnl3	0.0495687	-1.80706
Lamc1	0.0496327	-2.71142

## Sheet: GO terms EC (complete)
Table S2: GO Biological Process analysis of differentially expressed genes in P6 Gpr124 fl/fl vs Gpr124 ΔEC/ΔEC hyaloid endothelial cells. Upregulated and downregulated genes (Gpr124 fl/fl vs Gpr124 ΔEC/ΔEC) were analyzed separately. Inclusion criteria for GO terms: Overlapping genes ≥ 5 and p < 0.01. GO, gene ontology; P, postnatal day.
Input gene set	ID	Description	GeneRatio	BgRatio	RichFactor	FoldEnrichment	zScore	pvalue	p.adjust	qvalue	geneID	Count
Upregulated	GO:0002181	cytoplasmic translation	10/137	153/28905	0.0653595	13.7899	10.9462	3.31268e-09	3.31268e-09	6.43008e-06	Rpl6/Eif3m/Rpl11/Dhx36/Rpl14/Rpl13a/Rps27a/Rpl35a/Rpl22/Rps2	10
Upregulated	GO:0022613	ribonucleoprotein complex biogenesis	14/137	442/28905	0.0316742	6.6828	8.3084	2.66926e-08	2.66926e-08	2.59058e-05	Rpl6/Rpl11/C1qbp/Rbmx/Rpl14/Rpl13a/Traf7/Rpl35a/Ncl/Npm1/Rrp1/Snrpb/Sfswap/Mrpl20	14
Upregulated	GO:0042273	ribosomal large subunit biogenesis	7/137	75/28905	0.0933333	19.692	11.1853	6.98678e-08	6.98678e-08	3.42264e-05	Rpl6/Rpl11/Rpl14/Traf7/Rpl35a/Npm1/Mrpl20	7
Upregulated	GO:0140236	translation at presynapse	6/137	47/28905	0.12766	26.9343	12.2793	9.2933e-08	9.2933e-08	3.42264e-05	Rpl6/Rpl14/Rpl13a/Rps27a/Rpl35a/Rpl22	6
Upregulated	GO:0140241	translation at synapse	6/137	48/28905	0.125	26.3732	12.141	1.05797e-07	1.05797e-07	3.42264e-05	Rpl6/Rpl14/Rpl13a/Rps27a/Rpl35a/Rpl22	6
Upregulated	GO:0140242	translation at postsynapse	6/137	48/28905	0.125	26.3732	12.141	1.05797e-07	1.05797e-07	3.42264e-05	Rpl6/Rpl14/Rpl13a/Rps27a/Rpl35a/Rpl22	6
Upregulated	GO:0140694	non-membrane-bounded organelle assembly	12/137	414/28905	0.0289855	6.11552	7.2347	7.06196e-07	7.06196e-07	0.000195823	Rpl6/Rpl11/Cenpa/Atxn2/C1qbp/Tnnt2/Wnk1/Traf7/G3bp1/Npm1/Myh10/Mrpl20	12
Upregulated	GO:0022618	protein-RNA complex assembly	8/137	179/28905	0.0446927	9.42952	7.80685	2.34221e-06	2.34221e-06	0.000523702	Rpl6/Rpl11/Rbmx/Rpl13a/Traf7/Snrpb/Sfswap/Mrpl20	8
Upregulated	GO:1903320	regulation of protein modification by small protein conjugation or removal	9/137	247/28905	0.0364372	7.68773	7.28431	2.90968e-06	2.90968e-06	0.000523702	Rpl11/Chp1/Ndfip2/Wnk1/Traf7/Ubb/Npm1/Rps2/Svbp	9
Upregulated	GO:0031647	regulation of protein stability	10/137	318/28905	0.0314465	6.63476	6.97251	3.0152e-06	3.0152e-06	0.000523702	Crebbp/Get4/Rpl11/Nedd4l/Bag1/Chp1/Sox17/Serf2/Npm1/Rtn4	10
Upregulated	GO:0042254	ribosome biogenesis	10/137	320/28905	0.03125	6.59329	6.94317	3.18761e-06	3.18761e-06	0.000523702	Rpl6/Rpl11/C1qbp/Rpl14/Traf7/Rpl35a/Ncl/Npm1/Rrp1/Mrpl20	10
Upregulated	GO:1901873	regulation of post-translational protein modification	9/137	252/28905	0.0357143	7.53519	7.19048	3.42621e-06	3.42621e-06	0.000523702	Rpl11/Chp1/Ndfip2/Wnk1/Traf7/Ubb/Npm1/Rps2/Svbp	9
Upregulated	GO:0071826	protein-RNA complex organization	8/137	189/28905	0.042328	8.9306	7.54848	3.50744e-06	3.50744e-06	0.000523702	Rpl6/Rpl11/Rbmx/Rpl13a/Traf7/Snrpb/Sfswap/Mrpl20	8
Upregulated	GO:0031396	regulation of protein ubiquitination	8/137	211/28905	0.0379147	7.99945	7.04196	7.88156e-06	7.88156e-06	0.0010199	Rpl11/Chp1/Ndfip2/Wnk1/Ubb/Npm1/Rps2/Svbp	8
Upregulated	GO:0042255	ribosome assembly	5/137	66/28905	0.0757576	15.9837	8.40982	1.57487e-05	1.57487e-05	0.00191056	Rpl6/Rpl11/C1qbp/Traf7/Mrpl20	5
Upregulated	GO:0006091	generation of precursor metabolites and energy	11/137	488/28905	0.022541	4.75582	5.77444	2.22496e-05	2.22496e-05	0.00254045	Ppp1ca/Gnas/Cox5b/Pdhb/Ppp1cb/Ndufa10/Acat1/Ndufb7/Cox4i1/Ndufc2/Pgls	11
Upregulated	GO:0034248	regulation of amide metabolic process	10/137	432/28905	0.0231481	4.88392	5.61281	4.25229e-05	4.25229e-05	0.00458551	Ppp1ca/C1qbp/Dhx36/Igfbp5/Tmed2/Rpl13a/Cdk4/Ncl/Npm1/Rtn4	10
Upregulated	GO:0015980	energy derivation by oxidation of organic compounds	9/137	351/28905	0.025641	5.40988	5.7363	4.75063e-05	4.75063e-05	0.00485327	Ppp1ca/Gnas/Cox5b/Pdhb/Ppp1cb/Ndufa10/Ndufb7/Cox4i1/Ndufc2	9
Upregulated	GO:0050684	regulation of mRNA processing	6/137	142/28905	0.0422535	8.91488	6.52463	6.12822e-05	6.12822e-05	0.00557326	C1qbp/Dhx36/Rbmx/Ncl/Npm1/Sfswap	6
Upregulated	GO:0006417	regulation of translation	9/137	364/28905	0.0247253	5.21667	5.58689	6.2817e-05	6.2817e-05	0.00557326	Ppp1ca/C1qbp/Dhx36/Igfbp5/Tmed2/Rpl13a/Cdk4/Ncl/Npm1	9
Upregulated	GO:0031400	negative regulation of protein modification process	10/137	453/28905	0.0220751	4.65751	5.41456	6.31677e-05	6.31677e-05	0.00557326	Rpl11/Bag1/Chp1/Camk2n1/Nr2f2/Stk38/Tmed2/Wnk1/Npm1/Svbp	10
Upregulated	GO:0003007	heart morphogenesis	8/137	294/28905	0.0272109	5.7411	5.63859	8.38011e-05	8.38011e-05	0.00707227	Dag1/Foxc1/Heyl/Sox17/Tnnt2/Tmed2/Fkbp1a/Rtn4	8
Upregulated	GO:0007029	endoplasmic reticulum organization	5/137	96/28905	0.0520833	10.9888	6.76504	9.61381e-05	9.61381e-05	0.00750598	Get4/Tmcc1/Tmed2/Wnk1/Rtn4	5
Upregulated	GO:0007015	actin filament organization	10/137	477/28905	0.0209644	4.42317	5.20235	9.66741e-05	9.66741e-05	0.00750598	Arpc1b/Fam171a1/Tnnt2/S100a10/Fermt2/Add3/Tmsb10/Capzb/Wasf2/Myh10	10
Upregulated	GO:0000375	RNA splicing, via transesterification reactions	8/137	310/28905	0.0258065	5.44478	5.42964	0.000120811	0.000120811	0.00837505	C1qbp/Ubl5/Rbmx/Ncl/Npm1/Sf3b5/Snrpb/Sfswap	8
Upregulated	GO:0000377	RNA splicing, via transesterification reactions with bulged adenosine as nucleophile	8/137	310/28905	0.0258065	5.44478	5.42964	0.000120811	0.000120811	0.00837505	C1qbp/Ubl5/Rbmx/Ncl/Npm1/Sf3b5/Snrpb/Sfswap	8
Upregulated	GO:0000398	mRNA splicing, via spliceosome	8/137	310/28905	0.0258065	5.44478	5.42964	0.000120811	0.000120811	0.00837505	C1qbp/Ubl5/Rbmx/Ncl/Npm1/Sf3b5/Snrpb/Sfswap	8
Upregulated	GO:0009952	anterior/posterior pattern specification	7/137	240/28905	0.0291667	6.15374	5.53269	0.000153524	0.000153524	0.010158	Pbx1/Foxc1/Heyl/Sox17/Nr2f2/Tulp3/Tmed2	7
Upregulated	GO:0048024	regulation of mRNA splicing, via spliceosome	5/137	117/28905	0.042735	9.01647	5.99591	0.000243414	0.000243414	0.0138659	C1qbp/Rbmx/Ncl/Npm1/Sfswap	5
Upregulated	GO:1901989	positive regulation of cell cycle phase transition	5/137	119/28905	0.0420168	8.86493	5.93283	0.000263336	0.000263336	0.0141986	Crebbp/Anapc5/Pbx1/Cdk4/Npm1	5
Upregulated	GO:0043484	regulation of RNA splicing	6/137	190/28905	0.0315789	6.6627	5.40418	0.000300308	0.000300308	0.0153398	C1qbp/Rbmx/Ncl/Npm1/Sf3b5/Sfswap	6
Upregulated	GO:0006413	translational initiation	5/137	126/28905	0.0396825	8.37244	5.72325	0.000342949	0.000342949	0.0168746	Eif3m/Eif3h/Tmed2/Rpl13a/Npm1	5
Upregulated	GO:0009060	aerobic respiration	6/137	199/28905	0.0301508	6.36137	5.23721	0.00038432	0.00038432	0.0181948	Cox5b/Pdhb/Ndufa10/Ndufb7/Cox4i1/Ndufc2	6
Upregulated	GO:0003205	cardiac chamber development	6/137	200/28905	0.03	6.32956	5.2193	0.000394684	0.000394684	0.0182406	Foxc1/Heyl/Tnnt2/Fkbp1a/Myh10/Arid1a	6
Upregulated	GO:0050821	protein stabilization	6/137	204/28905	0.0294118	6.20545	5.14884	0.000438345	0.000438345	0.0197872	Rpl11/Bag1/Chp1/Sox17/Npm1/Rtn4	6
Upregulated	GO:0009260	ribonucleotide biosynthetic process	6/137	211/28905	0.028436	5.99958	5.02995	0.000523736	0.000523736	0.0225911	Pdhb/Rfk/Ndufa10/Acat1/Ndufb7/Ndufc2	6
Upregulated	GO:0006364	rRNA processing	6/137	216/28905	0.0277778	5.86071	4.94826	0.000592265	0.000592265	0.0233148	Rpl11/Rpl14/Rpl35a/Ncl/Npm1/Rrp1	6
Upregulated	GO:1903322	positive regulation of protein modification by small protein conjugation or removal	5/137	143/28905	0.034965	7.37711	5.27554	0.000611515	0.000611515	0.0233148	Ndfip2/Traf7/Ubb/Npm1/Rps2	5
Upregulated	GO:1901875	positive regulation of post-translational protein modification	5/137	144/28905	0.0347222	7.32588	5.25152	0.000631129	0.000631129	0.0233148	Ndfip2/Traf7/Ubb/Npm1/Rps2	5
Upregulated	GO:0046390	ribose phosphate biosynthetic process	6/137	219/28905	0.0273973	5.78042	4.90047	0.000636604	0.000636604	0.0233148	Pdhb/Rfk/Ndufa10/Acat1/Ndufb7/Ndufc2	6
Upregulated	GO:0031032	actomyosin structure organization	6/137	223/28905	0.0269058	5.67674	4.8381	0.00069968	0.00069968	0.0247601	Fam171a1/Tnnt2/S100a10/Fermt2/Wasf2/Myh10	6
Upregulated	GO:0006119	oxidative phosphorylation	5/137	148/28905	0.0337838	7.12789	5.15768	0.000714336	0.000714336	0.0247601	Cox5b/Ndufa10/Ndufb7/Cox4i1/Ndufc2	5
Upregulated	GO:0048706	embryonic skeletal system development	5/137	148/28905	0.0337838	7.12789	5.15768	0.000714336	0.000714336	0.0247601	Gnas/Pbx1/Slc39a1/Zeb1/Tulp3	5
Upregulated	GO:1904375	regulation of protein localization to cell periphery	5/137	156/28905	0.0320513	6.76235	4.98007	0.000905049	0.000905049	0.0287881	Rap1a/Dag1/Acsl3/Tmed2/Wnk1	5
Upregulated	GO:0001933	negative regulation of protein phosphorylation	7/137	326/28905	0.0214724	4.53036	4.42373	0.000958761	0.000958761	0.0287881	Bag1/Chp1/Camk2n1/Nr2f2/Stk38/Tmed2/Npm1	7
Upregulated	GO:0048562	embryonic organ morphogenesis	7/137	335/28905	0.0208955	4.40865	4.33046	0.00112215	0.00112215	0.0308671	Gnas/Slc39a1/Zeb1/Sox17/Tulp3/Tmed2/Arid1a	7
Upregulated	GO:0034504	protein localization to nucleus	7/137	337/28905	0.0207715	4.38249	4.31018	0.00116126	0.00116126	0.0308671	Crebbp/Rpl11/Tnpo3/Chp1/Fermt2/Dnajb6/Npm1	7
Upregulated	GO:1903828	negative regulation of protein localization	6/137	246/28905	0.0243902	5.14599	4.5066	0.00116171	0.00116171	0.0308671	Nedd4l/Chp1/Ndfip2/Tmed2/Wnk1/Btf3	6
Upregulated	GO:0001837	epithelial to mesenchymal transition	5/137	165/28905	0.030303	6.3935	4.79461	0.00116229	0.00116229	0.0308671	Dag1/Foxc1/Heyl/Fermt2/Rtn4	5
Upregulated	GO:0034249	negative regulation of amide metabolic process	5/137	165/28905	0.030303	6.3935	4.79461	0.00116229	0.00116229	0.0308671	Dhx36/Igfbp5/Rpl13a/Ncl/Rtn4	5
Upregulated	GO:0030323	respiratory tube development	6/137	251/28905	0.0239044	5.04348	4.44001	0.00128746	0.00128746	0.0324549	Dag1/Ppp1ca/Abca3/Tulp3/Igfbp5/Rpl13a	6
Upregulated	GO:0045333	cellular respiration	6/137	255/28905	0.0235294	4.96436	4.38799	0.00139535	0.00139535	0.0337733	Cox5b/Pdhb/Ndufa10/Ndufb7/Cox4i1/Ndufc2	6
Upregulated	GO:0042326	negative regulation of phosphorylation	7/137	349/28905	0.0200573	4.2318	4.19172	0.00141897	0.00141897	0.0337733	Bag1/Chp1/Camk2n1/Nr2f2/Stk38/Tmed2/Npm1	7
Upregulated	GO:0016072	rRNA metabolic process	6/137	256/28905	0.0234375	4.94497	4.37515	0.00142337	0.00142337	0.0337733	Rpl11/Rpl14/Rpl35a/Ncl/Npm1/Rrp1	6
Upregulated	GO:0008380	RNA splicing	8/137	455/28905	0.0175824	3.70963	4.02031	0.00151393	0.00151393	0.0353018	C1qbp/Ubl5/Rbmx/Ncl/Npm1/Sf3b5/Snrpb/Sfswap	8
Upregulated	GO:0051017	actin filament bundle assembly	5/137	176/28905	0.0284091	5.9939	4.58586	0.00154589	0.00154589	0.0353018	Fam171a1/S100a10/Fermt2/Wasf2/Myh10	5
Upregulated	GO:0051494	negative regulation of cytoskeleton organization	5/137	177/28905	0.0282486	5.96004	4.56776	0.00158486	0.00158486	0.035574	Add3/Tmsb10/Npm1/Capzb/Wasf2	5
Upregulated	GO:0007565	female pregnancy	5/137	180/28905	0.0277778	5.86071	4.5143	0.00170613	0.00170613	0.0363922	C1qbp/Nr2f2/Igfbp5/Tmed2/Arid1a	5
Upregulated	GO:0061572	actin filament bundle organization	5/137	180/28905	0.0277778	5.86071	4.5143	0.00170613	0.00170613	0.0363922	Fam171a1/S100a10/Fermt2/Wasf2/Myh10	5
Upregulated	GO:0009165	nucleotide biosynthetic process	6/137	267/28905	0.0224719	4.74124	4.23823	0.00176076	0.00176076	0.0371491	Pdhb/Rfk/Ndufa10/Acat1/Ndufb7/Ndufc2	6
Upregulated	GO:1901293	nucleoside phosphate biosynthetic process	6/137	269/28905	0.0223048	4.70599	4.21414	0.00182811	0.00182811	0.0381554	Pdhb/Rfk/Ndufa10/Acat1/Ndufb7/Ndufc2	6
Upregulated	GO:0090068	positive regulation of cell cycle process	6/137	275/28905	0.0218182	4.60332	4.14326	0.00204193	0.00204193	0.0403608	Crebbp/Anapc5/Pbx1/Wnk1/Cdk4/Npm1	6
Upregulated	GO:0007369	gastrulation	5/137	188/28905	0.0265957	5.61131	4.37742	0.00206273	0.00206273	0.0403608	Dag1/Foxc1/Sox17/Wnk1/Arid1a	5
Upregulated	GO:0022604	regulation of cell morphogenesis	6/137	276/28905	0.0217391	4.58664	4.13165	0.00207933	0.00207933	0.0403608	Fam171a1/Nedd4l/Dhx36/Fermt2/Capzb/Myh10	6
Upregulated	GO:0060541	respiratory system development	6/137	281/28905	0.0213523	4.50503	4.0744	0.00227415	0.00227415	0.0425054	Dag1/Ppp1ca/Abca3/Tulp3/Igfbp5/Rpl13a	6
Upregulated	GO:0110053	regulation of actin filament organization	6/137	283/28905	0.0212014	4.47319	4.05187	0.00235582	0.00235582	0.0425054	S100a10/Fermt2/Add3/Tmsb10/Capzb/Wasf2	6
Upregulated	GO:0007389	pattern specification process	8/137	491/28905	0.0162933	3.43764	3.75949	0.00242838	0.00242838	0.0425054	Pbx1/Foxc1/Zeb1/Heyl/Sox17/Nr2f2/Tulp3/Tmed2	8
Upregulated	GO:0007517	muscle organ development	7/137	385/28905	0.0181818	3.8361	3.866	0.00246699	0.00246699	0.0425054	Dag1/Foxc1/Heyl/Nr2f2/Tnnt2/Unc45b/Fkbp1a	7
Upregulated	GO:0051051	negative regulation of transport	8/137	497/28905	0.0160966	3.39614	3.71839	0.0026158	0.0026158	0.0426164	Rap1a/Calm3/Nedd4l/Chp1/Atxn2/Ndfip2/Wnk1/Rap1b	8
Upregulated	GO:0009152	purine ribonucleotide biosynthetic process	5/137	199/28905	0.0251256	5.30114	4.20154	0.00263818	0.00263818	0.0426164	Pdhb/Ndufa10/Acat1/Ndufb7/Ndufc2	5
Upregulated	GO:0010639	negative regulation of organelle organization	7/137	390/28905	0.0179487	3.78692	3.82388	0.00265019	0.00265019	0.0426164	Slc25a5/Add3/Tmsb10/Npm1/Tnks2/Capzb/Wasf2	7
Upregulated	GO:0006605	protein targeting	6/137	293/28905	0.0204778	4.32052	3.94231	0.00279776	0.00279776	0.0437952	Get4/Samm50/Rpl11/Erbin/Vps52/Romo1	6
Upregulated	GO:0060562	epithelial tube morphogenesis	7/137	395/28905	0.0177215	3.73898	3.78245	0.00284368	0.00284368	0.0441578	Dag1/Ppp1ca/Pbx1/Sox17/Tulp3/Tmed2/Arid1a	7
Upregulated	GO:0044703	multi-organism reproductive process	5/137	209/28905	0.0239234	5.0475	4.0526	0.0032551	0.0032551	0.0481306	C1qbp/Nr2f2/Igfbp5/Tmed2/Arid1a	5
Upregulated	GO:0032970	regulation of actin filament-based process	7/137	409/28905	0.0171149	3.611	3.66995	0.00344344	0.00344344	0.0493702	Tnnt2/S100a10/Fermt2/Add3/Tmsb10/Capzb/Wasf2	7
Upregulated	GO:0048736	appendage development	5/137	213/28905	0.0234742	4.95271	3.99566	0.00352878	0.00352878	0.0493702	Gnas/Pbx1/Slc39a1/Tulp3/Fermt2	5
Upregulated	GO:0060173	limb development	5/137	213/28905	0.0234742	4.95271	3.99566	0.00352878	0.00352878	0.0493702	Gnas/Pbx1/Slc39a1/Tulp3/Fermt2	5
Upregulated	GO:0044706	multi-multicellular organism process	5/137	214/28905	0.0233645	4.92957	3.98165	0.00359971	0.00359971	0.0493702	C1qbp/Nr2f2/Igfbp5/Tmed2/Arid1a	5
Upregulated	GO:0043087	regulation of GTPase activity	6/137	309/28905	0.0194175	4.0968	3.77681	0.0036305	0.0036305	0.0493702	Gnas/S100a10/Fermt2/Tmed2/Wnk1/Arhgap29	6
Upregulated	GO:1905475	regulation of protein localization to membrane	5/137	215/28905	0.0232558	4.90664	3.96772	0.00367165	0.00367165	0.0493702	Rap1a/Dag1/Acsl3/Tmed2/Wnk1	5
Upregulated	GO:1903311	regulation of mRNA metabolic process	6/137	310/28905	0.0193548	4.08359	3.76684	0.00368804	0.00368804	0.0493702	C1qbp/Dhx36/Rbmx/Ncl/Npm1/Sfswap	6
Upregulated	GO:0032535	regulation of cellular component size	7/137	415/28905	0.0168675	3.55879	3.62324	0.00372818	0.00372818	0.0495622	Add3/Wnk1/Cdk4/Tmsb10/Npm1/Capzb/Rtn4	7
Upregulated	GO:0010563	negative regulation of phosphorus metabolic process	7/137	419/28905	0.0167064	3.52482	3.59257	0.00392773	0.00392773	0.049853	Bag1/Chp1/Camk2n1/Nr2f2/Stk38/Tmed2/Npm1	7
Upregulated	GO:0045936	negative regulation of phosphate metabolic process	7/137	419/28905	0.0167064	3.52482	3.59257	0.00392773	0.00392773	0.049853	Bag1/Chp1/Camk2n1/Nr2f2/Stk38/Tmed2/Npm1	7
Upregulated	GO:0043523	regulation of neuron apoptotic process	6/137	320/28905	0.01875	3.95598	3.66937	0.00430141	0.00430141	0.0521829	Bag1/Ube2m/Traf7/Ubb/Gclm/Npm1	6
Upregulated	GO:1903050	regulation of proteolysis involved in protein catabolic process	5/137	224/28905	0.0223214	4.7095	3.84615	0.00436633	0.00436633	0.0523203	Rpl11/Eif3h/Anks1/Traf7/Ubb	5
Upregulated	GO:0043491	phosphatidylinositol 3-kinase/protein kinase B signal transduction	6/137	321/28905	0.0186916	3.94365	3.65984	0.00436665	0.00436665	0.0523203	Dag1/Pik3c2b/C1qbp/Fermt2/Igfbp5/Rtn4	6
Upregulated	GO:0008217	regulation of blood pressure	5/137	226/28905	0.0221239	4.66782	3.82001	0.00453259	0.00453259	0.0536463	Gnas/Nedd4l/Camk2n1/Nr2f2/Wnk1	5
Upregulated	GO:0030111	regulation of Wnt signaling pathway	6/137	324/28905	0.0185185	3.90714	3.63148	0.00456675	0.00456675	0.053723	Apcdd1/Usp34/Sox17/Wnk1/G3bp1/Tnks2	6
Upregulated	GO:0051047	positive regulation of secretion	7/137	439/28905	0.0159453	3.36423	3.44464	0.00504984	0.00504984	0.0569884	Gnas/Acsl3/Dpysl2/Camk2n1/S100a10/Myh10/Rtn4	7
Upregulated	GO:0006164	purine nucleotide biosynthetic process	5/137	233/28905	0.0214592	4.52758	3.73088	0.00515006	0.00515006	0.0571231	Pdhb/Ndufa10/Acat1/Ndufb7/Ndufc2	5
Upregulated	GO:0051348	negative regulation of transferase activity	5/137	233/28905	0.0214592	4.52758	3.73088	0.00515006	0.00515006	0.0571231	Rpl11/Camk2n1/Nr2f2/Stk38/Npm1	5
Upregulated	GO:0009416	response to light stimulus	6/137	333/28905	0.018018	3.80154	3.5484	0.0052077	0.0052077	0.0573184	Crebbp/Dynlrb1/Ppp1ca/Ppp1cb/Dhx36/Npm1	6
Upregulated	GO:0032409	regulation of transporter activity	5/137	236/28905	0.0211864	4.47003	3.69375	0.00543211	0.00543211	0.0585779	Calm3/Nedd4l/Chp1/Ndfip2/Fkbp1a	5
Upregulated	GO:0003002	regionalization	7/137	448/28905	0.015625	3.29665	3.38083	0.00562701	0.00562701	0.0603443	Pbx1/Foxc1/Heyl/Sox17/Nr2f2/Tulp3/Tmed2	7
Upregulated	GO:0072522	purine-containing compound biosynthetic process	5/137	240/28905	0.0208333	4.39553	3.6452	0.00582495	0.00582495	0.0614486	Pdhb/Ndufa10/Acat1/Ndufb7/Ndufc2	5
Upregulated	GO:0043270	positive regulation of monoatomic ion transport	5/137	241/28905	0.0207469	4.37729	3.63323	0.00592621	0.00592621	0.0621788	Gnas/Calm3/Nedd4l/Chp1/Wnk1	5
Upregulated	GO:0034764	positive regulation of transmembrane transport	5/137	243/28905	0.0205761	4.34126	3.60948	0.00613243	0.00613243	0.0623245	Rap1a/Calm3/Nedd4l/Chp1/Wnk1	5
Upregulated	GO:0045664	regulation of neuron differentiation	5/137	245/28905	0.0204082	4.30582	3.58599	0.00634366	0.00634366	0.0628234	Pbx1/Zeb1/Heyl/Dpysl2/Rtn4	5
Upregulated	GO:0009259	ribonucleotide metabolic process	7/137	460/28905	0.0152174	3.21065	3.29822	0.00647189	0.00647189	0.0630407	Acsl3/Pdhb/Rfk/Ndufa10/Acat1/Ndufb7/Ndufc2	7
Upregulated	GO:0051651	maintenance of location in cell	5/137	247/28905	0.0202429	4.27096	3.56275	0.00655996	0.00655996	0.0630407	Calm3/Tmed2/Tmsb10/Fkbp1a/Ftl1	5
Upregulated	GO:0016055	Wnt signaling pathway	7/137	462/28905	0.0151515	3.19675	3.28472	0.00662143	0.00662143	0.0630407	Apcdd1/Usp34/Sox17/Fermt2/Wnk1/G3bp1/Tnks2	7
Upregulated	GO:0030324	lung development	5/137	248/28905	0.0201613	4.25374	3.55122	0.00667002	0.00667002	0.0630407	Dag1/Ppp1ca/Abca3/Igfbp5/Rpl13a	5
Upregulated	GO:0198738	cell-cell signaling by wnt	7/137	464/28905	0.0150862	3.18297	3.27129	0.00677352	0.00677352	0.0630407	Apcdd1/Usp34/Sox17/Fermt2/Wnk1/G3bp1/Tnks2	7
Upregulated	GO:0001763	morphogenesis of a branching structure	5/137	249/28905	0.0200803	4.23665	3.53975	0.00678137	0.00678137	0.0630407	Dag1/Ppp1ca/Pbx1/Tmed2/Rtn4	5
Upregulated	GO:0060828	regulation of canonical Wnt signaling pathway	5/137	253/28905	0.0197628	4.16967	3.49447	0.00723983	0.00723983	0.0658496	Usp34/Sox17/Wnk1/G3bp1/Tnks2	5
Upregulated	GO:0048762	mesenchymal cell differentiation	5/137	254/28905	0.019685	4.15326	3.4833	0.00735774	0.00735774	0.0658995	Dag1/Foxc1/Heyl/Fermt2/Rtn4	5
Upregulated	GO:0032956	regulation of actin cytoskeleton organization	6/137	359/28905	0.0167131	3.52622	3.32376	0.00742982	0.00742982	0.0658995	S100a10/Fermt2/Add3/Tmsb10/Capzb/Wasf2	6
Upregulated	GO:0045787	positive regulation of cell cycle	6/137	359/28905	0.0167131	3.52622	3.32376	0.00742982	0.00742982	0.0658995	Crebbp/Anapc5/Pbx1/Wnk1/Cdk4/Npm1	6
Upregulated	GO:0099173	postsynapse organization	5/137	255/28905	0.0196078	4.13697	3.47218	0.00747699	0.00747699	0.0658995	Dhx36/Stk38/Rbmx/Wasf2/Myh10	5
Upregulated	GO:0019693	ribose phosphate metabolic process	7/137	474/28905	0.0147679	3.11582	3.20521	0.00757332	0.00757332	0.0662172	Acsl3/Pdhb/Rfk/Ndufa10/Acat1/Ndufb7/Ndufc2	7
Upregulated	GO:0051235	maintenance of location	6/137	366/28905	0.0163934	3.45878	3.26682	0.00812993	0.00812993	0.06725	Get4/Calm3/Tmed2/Tmsb10/Fkbp1a/Ftl1	6
Upregulated	GO:0045926	negative regulation of growth	5/137	261/28905	0.0191571	4.04187	3.40665	0.00822093	0.00822093	0.06725	Gnas/Sox17/Atxn2/Igfbp5/Rtn4	5
Upregulated	GO:0072593	reactive oxygen species metabolic process	5/137	262/28905	0.019084	4.02644	3.39592	0.00834973	0.00834973	0.06725	Hbb-bt/Rfk/Romo1/Ndufc2/Hba-a1	5
Upregulated	GO:0048705	skeletal system morphogenesis	5/137	265/28905	0.0188679	3.98086	3.36405	0.00874452	0.00874452	0.0676985	Gnas/Slc39a1/Foxc1/Zeb1/Tulp3	5
Upregulated	GO:0090150	establishment of protein localization to membrane	5/137	268/28905	0.0186567	3.93629	3.33263	0.00915206	0.00915206	0.069123	Get4/Samm50/Acsl3/Romo1/Wnk1	5
Upregulated	GO:0000209	protein polyubiquitination	5/137	272/28905	0.0183824	3.87841	3.29145	0.0097156	0.0097156	0.0721874	Anapc5/Nedd4l/Zfp91/Traf7/Tnks2	5
Upregulated	GO:0051402	neuron apoptotic process	6/137	381/28905	0.015748	3.3226	3.14932	0.00978825	0.00978825	0.0721874	Bag1/Ube2m/Traf7/Ubb/Gclm/Npm1	6
Downregulated	GO:0090287	regulation of cellular response to growth factor stimulus	8/99	327/28905	0.0244648	7.14299	6.54927	1.72617e-05	1.72617e-05	0.0066367	Mmrn2/Pdgfb/Rnf111/Ogt/Zbtb7a/Nrp1/Numa1/Cdh5	8
Downregulated	GO:0040013	negative regulation of locomotion	8/99	364/28905	0.021978	6.41692	6.0971	3.70186e-05	3.70186e-05	0.00748468	Mmrn2/Sema6d/Pdgfb/Ogt/Gtpbp4/Nedd9/Nrp1/Clic4	8
Downregulated	GO:0018212	peptidyl-tyrosine modification	7/99	311/28905	0.022508	6.57167	5.79139	9.9708e-05	9.9708e-05	0.0117212	Flt1/Pdgfb/Insr/Nedd9/Nrp1/Tpst1/Il2	7
Downregulated	GO:0030336	negative regulation of cell migration	7/99	319/28905	0.0219436	6.40686	5.69271	0.000116694	0.000116694	0.0117212	Mmrn2/Sema6d/Pdgfb/Ogt/Gtpbp4/Nedd9/Clic4	7
Downregulated	GO:0030198	extracellular matrix organization	7/99	327/28905	0.0214067	6.25012	5.59734	0.000135963	0.000135963	0.0117212	Col4a1/Col4a2/Col5a2/Col1a1/Apbb2/Lcp1/Lamc1	7
Downregulated	GO:0045229	external encapsulating structure organization	7/99	328/28905	0.0213415	6.23106	5.58565	0.000138543	0.000138543	0.0117212	Col4a1/Col4a2/Col5a2/Col1a1/Apbb2/Lcp1/Lamc1	7
Downregulated	GO:0043062	extracellular structure organization	7/99	329/28905	0.0212766	6.21212	5.574	0.000141163	0.000141163	0.0117212	Col4a1/Col4a2/Col5a2/Col1a1/Apbb2/Lcp1/Lamc1	7
Downregulated	GO:2000146	negative regulation of cell motility	7/99	332/28905	0.0210843	6.15599	5.53934	0.000149265	0.000149265	0.0117212	Mmrn2/Sema6d/Pdgfb/Ogt/Gtpbp4/Nedd9/Clic4	7
Downregulated	GO:0120161	regulation of cold-induced thermogenesis	5/99	151/28905	0.0331126	9.66787	6.26047	0.000175428	0.000175428	0.0131198	Prkab1/Epas1/Ogt/Npr3/Nova2	5
Downregulated	GO:0106106	cold-induced thermogenesis	5/99	155/28905	0.0322581	9.41838	6.1607	0.000198131	0.000198131	0.0135291	Prkab1/Epas1/Ogt/Npr3/Nova2	5
Downregulated	GO:0007411	axon guidance	6/99	255/28905	0.0235294	6.86988	5.5194	0.000251045	0.000251045	0.0161052	Sema6d/Ablim1/Nrp1/Apbb2/Nova2/Lamc1	6
Downregulated	GO:0097485	neuron projection guidance	6/99	256/28905	0.0234375	6.84304	5.50502	0.000256366	0.000256366	0.0161052	Sema6d/Ablim1/Nrp1/Apbb2/Nova2/Lamc1	6
Downregulated	GO:0034329	cell junction assembly	8/99	487/28905	0.0164271	4.79622	4.95306	0.000274899	0.000274899	0.0166052	Tns1/Pdgfb/Ogt/Nrp1/Adgrl1/Rhoc/Cdh5/Lamc1	8
Downregulated	GO:1990845	adaptive thermogenesis	5/99	174/28905	0.0287356	8.38993	5.73185	0.000338023	0.000338023	0.019662	Prkab1/Epas1/Ogt/Npr3/Nova2	5
Downregulated	GO:0001890	placenta development	5/99	185/28905	0.027027	7.89107	5.51233	0.000447426	0.000447426	0.0225954	Epas1/Pdgfb/Pbrm1/Gab1/Vwf	5
Downregulated	GO:0043484	regulation of RNA splicing	5/99	190/28905	0.0263158	7.68341	5.41846	0.000505151	0.000505151	0.0225954	Mbnl2/Zbtb7a/Clns1a/Trrap/Nova2	5
Downregulated	GO:0051897	positive regulation of phosphatidylinositol 3-kinase/protein kinase B signal transduction	5/99	195/28905	0.025641	7.4864	5.32794	0.000568312	0.000568312	0.0225954	Flt1/Pdgfb/Insr/Ube3a/Rgl2	5
Downregulated	GO:0001659	temperature homeostasis	5/99	196/28905	0.0255102	7.44821	5.31023	0.000581624	0.000581624	0.0225954	Prkab1/Epas1/Ogt/Npr3/Nova2	5
Downregulated	GO:0018108	peptidyl-tyrosine phosphorylation	6/99	309/28905	0.0194175	5.66931	4.83765	0.000692774	0.000692774	0.0225954	Flt1/Pdgfb/Insr/Nedd9/Nrp1/Il2	6
Downregulated	GO:1903311	regulation of mRNA metabolic process	6/99	310/28905	0.0193548	5.65103	4.82658	0.000704518	0.000704518	0.0225954	Elavl1/Mbnl2/Zbtb7a/Btg2/Clns1a/Nova2	6
Downregulated	GO:0006109	regulation of carbohydrate metabolic process	5/99	206/28905	0.0242718	7.08664	5.13965	0.000727991	0.000727991	0.0225954	Pdgfb/Ogt/Zbtb7a/Insr/Mtch2	5
Downregulated	GO:0008380	RNA splicing	7/99	455/28905	0.0153846	4.49184	4.40123	0.000981021	0.000981021	0.0265641	Smndc1/Mbnl2/Zbtb7a/Dhx15/Clns1a/Trrap/Nova2	7
Downregulated	GO:0006935	chemotaxis	7/99	465/28905	0.0150538	4.39524	4.32701	0.00111225	0.00111225	0.0291135	Sema6d/Flt1/Pdgfb/Gab1/Nedd9/Nrp1/Nova2	7
Downregulated	GO:0042330	taxis	7/99	467/28905	0.0149893	4.37642	4.31241	0.00114007	0.00114007	0.0293527	Sema6d/Flt1/Pdgfb/Gab1/Nedd9/Nrp1/Nova2	7
Downregulated	GO:0061138	morphogenesis of a branching epithelium	5/99	229/28905	0.0218341	6.37488	4.78721	0.00116765	0.00116765	0.0294869	Flt1/Col4a1/Pdgfb/Nrp1/Clic4	5
Downregulated	GO:0001667	ameboidal-type cell migration	7/99	470/28905	0.0148936	4.34848	4.29068	0.00118284	0.00118284	0.0294869	Mmrn2/Sema6d/Tns1/Pdgfb/Nrp1/Amotl2/Cdh5	7
Downregulated	GO:0046034	ATP metabolic process	5/99	232/28905	0.0215517	6.29245	4.74482	0.00123689	0.00123689	0.0297241	Ogt/Zbtb7a/Ndufs6/Insr/Mtch2	5
Downregulated	GO:0050920	regulation of chemotaxis	5/99	246/28905	0.0203252	5.93434	4.5564	0.00160086	0.00160086	0.0336746	Sema6d/Pdgfb/Nedd9/Nrp1/Nova2	5
Downregulated	GO:1903320	regulation of protein modification by small protein conjugation or removal	5/99	247/28905	0.0202429	5.91032	4.5435	0.00162956	0.00162956	0.0336746	Epas1/Rnf111/Ogt/Gtpbp4/Ube3a	5
Downregulated	GO:0001763	morphogenesis of a branching structure	5/99	249/28905	0.0200803	5.86285	4.51791	0.00168811	0.00168811	0.0337488	Flt1/Col4a1/Pdgfb/Nrp1/Clic4	5
Downregulated	GO:0071560	cellular response to transforming growth factor beta stimulus	5/99	250/28905	0.02	5.83939	4.50522	0.00171795	0.00171795	0.0337488	Col4a2/Rnf111/Ogt/Zbtb7a/Cdh5	5
Downregulated	GO:0031589	cell-substrate adhesion	6/99	369/28905	0.0162602	4.74747	4.24728	0.00171911	0.00171911	0.0337488	Pdgfb/Nedd9/Nrp1/Col1a1/Vwf/Lamc1	6
Downregulated	GO:1901873	regulation of post-translational protein modification	5/99	252/28905	0.0198413	5.79305	4.48004	0.0017788	0.0017788	0.0344895	Epas1/Rnf111/Ogt/Gtpbp4/Ube3a	5
Downregulated	GO:0071559	response to transforming growth factor beta	5/99	255/28905	0.0196078	5.7249	4.44278	0.00187302	0.00187302	0.0358735	Col4a2/Rnf111/Ogt/Zbtb7a/Cdh5	5
Downregulated	GO:0009205	purine ribonucleoside triphosphate metabolic process	5/99	257/28905	0.0194553	5.68034	4.41827	0.00193783	0.00193783	0.0366676	Ogt/Zbtb7a/Ndufs6/Insr/Mtch2	5
Downregulated	GO:0009199	ribonucleoside triphosphate metabolic process	5/99	264/28905	0.0189394	5.52973	4.33446	0.00217765	0.00217765	0.0394497	Ogt/Zbtb7a/Ndufs6/Insr/Mtch2	5
Downregulated	GO:0009144	purine nucleoside triphosphate metabolic process	5/99	266/28905	0.018797	5.48815	4.31106	0.00224998	0.00224998	0.0394497	Ogt/Zbtb7a/Ndufs6/Insr/Mtch2	5
Downregulated	GO:0090092	regulation of transmembrane receptor protein serine/threonine kinase signaling pathway	5/99	266/28905	0.018797	5.48815	4.31106	0.00224998	0.00224998	0.0394497	Rnf111/Ogt/Zbtb7a/Numa1/Cdh5	5
Downregulated	GO:0060562	epithelial tube morphogenesis	6/99	395/28905	0.0151899	4.43498	4.02976	0.00241613	0.00241613	0.0399431	Mmrn2/Flt1/Col4a1/Nrp1/Brpf1/Clic4	6
Downregulated	GO:0008544	epidermis development	6/99	397/28905	0.0151134	4.41264	4.01382	0.00247741	0.00247741	0.0401117	Atp2c1/Gab1/Insr/Numa1/Clic4/Lamc1	6
Downregulated	GO:0021700	developmental maturation	6/99	400/28905	0.015	4.37955	3.99009	0.00257152	0.00257152	0.0412106	Pebp1/Epas1/Pdgfb/Zbtb7a/Adgrl1/Cdh5	6
Downregulated	GO:0051896	regulation of phosphatidylinositol 3-kinase/protein kinase B signal transduction	5/99	278/28905	0.0179856	5.25125	4.17548	0.00272126	0.00272126	0.0419001	Flt1/Pdgfb/Insr/Ube3a/Rgl2	5
Downregulated	GO:0009141	nucleoside triphosphate metabolic process	5/99	281/28905	0.0177936	5.19519	4.14281	0.00284947	0.00284947	0.0426206	Ogt/Zbtb7a/Ndufs6/Insr/Mtch2	5
Downregulated	GO:0010563	negative regulation of phosphorus metabolic process	6/99	419/28905	0.0143198	4.18095	3.84506	0.00323142	0.00323142	0.0459347	Pebp1/Pdgfb/Ogt/Insr/Mtch2/Il2	6
Downregulated	GO:0045936	negative regulation of phosphate metabolic process	6/99	419/28905	0.0143198	4.18095	3.84506	0.00323142	0.00323142	0.0459347	Pebp1/Pdgfb/Ogt/Insr/Mtch2/Il2	6
Downregulated	GO:0071900	regulation of protein serine/threonine kinase activity	5/99	294/28905	0.0170068	4.96547	4.00643	0.00345603	0.00345603	0.0484624	Flt1/Pdgfb/Gab1/Insr/Gtpbp4	5
Downregulated	GO:0001654	eye development	6/99	431/28905	0.0139211	4.06454	3.75781	0.00370877	0.00370877	0.049219	Flt1/Col4a1/Pdgfb/Nrp1/Col5a2/Clic4	6
Downregulated	GO:0006302	double-strand break repair	5/99	300/28905	0.0166667	4.86616	3.94616	0.00376521	0.00376521	0.049219	Smarce1/Pbrm1/Zbtb7a/Hpf1/Trrap	5
Downregulated	GO:0150063	visual system development	6/99	434/28905	0.0138249	4.03645	3.73649	0.00383589	0.00383589	0.049219	Flt1/Col4a1/Pdgfb/Nrp1/Col5a2/Clic4	6
Downregulated	GO:0048880	sensory system development	6/99	438/28905	0.0136986	3.99958	3.70836	0.0040104	0.0040104	0.0507938	Flt1/Col4a1/Pdgfb/Nrp1/Col5a2/Clic4	6
Downregulated	GO:0045860	positive regulation of protein kinase activity	5/99	308/28905	0.0162338	4.73977	3.86825	0.0042077	0.0042077	0.0512608	Flt1/Pdgfb/Gab1/Insr/Nedd9	5
Downregulated	GO:0050807	regulation of synapse organization	5/99	309/28905	0.0161812	4.72443	3.8587	0.00426551	0.00426551	0.0512608	Sparcl1/Ogt/Nedd9/Ube3a/Adgrl1	5
Downregulated	GO:0045765	regulation of angiogenesis	5/99	310/28905	0.016129	4.70919	3.84919	0.00432389	0.00432389	0.0512608	Flt1/Col4a2/Gab1/Nrp1/Cdh5	5
Downregulated	GO:0050803	regulation of synapse structure or activity	5/99	317/28905	0.0157729	4.6052	3.78375	0.00474862	0.00474862	0.0525199	Sparcl1/Ogt/Nedd9/Ube3a/Adgrl1	5
Downregulated	GO:1901342	regulation of vasculature development	5/99	317/28905	0.0157729	4.6052	3.78375	0.00474862	0.00474862	0.0525199	Flt1/Col4a2/Gab1/Nrp1/Cdh5	5
Downregulated	GO:1903706	regulation of hemopoiesis	6/99	457/28905	0.0131291	3.8333	3.57915	0.00492081	0.00492081	0.0534645	Smarce1/Pbrm1/Zbtb7a/Nedd9/Brpf1/Il2	6
Downregulated	GO:0043491	phosphatidylinositol 3-kinase/protein kinase B signal transduction	5/99	321/28905	0.0155763	4.54781	3.7472	0.00500423	0.00500423	0.0534645	Flt1/Pdgfb/Insr/Ube3a/Rgl2	5
Downregulated	GO:0051054	positive regulation of DNA metabolic process	5/99	321/28905	0.0155763	4.54781	3.7472	0.00500423	0.00500423	0.0534645	Smarce1/Pdgfb/Pbrm1/Il2/Trrap	5
Downregulated	GO:0071695	anatomical structure maturation	5/99	327/28905	0.0152905	4.46437	3.69349	0.00540577	0.00540577	0.0562245	Pebp1/Epas1/Pdgfb/Zbtb7a/Cdh5	5
Downregulated	GO:0032102	negative regulation of response to external stimulus	6/99	470/28905	0.012766	3.72727	3.49467	0.00562588	0.00562588	0.056524	Sema6d/Pdgfb/Zdhhc18/Nrp1/Il2/Cdh5	6
Downregulated	GO:0016032	viral process	5/99	332/28905	0.0150602	4.39713	3.64971	0.0057574	0.0057574	0.056524	Ccnk/Insr/Nrp1/Tasor/Spcs3	5
Downregulated	GO:0060326	cell chemotaxis	5/99	334/28905	0.0149701	4.3708	3.63245	0.00590247	0.00590247	0.0572221	Flt1/Pdgfb/Gab1/Nedd9/Nrp1	5
Downregulated	GO:0043588	skin development	5/99	342/28905	0.0146199	4.26856	3.5647	0.00650862	0.00650862	0.060845	Col5a2/Col1a1/Numa1/Clic4/Lamc1	5
Downregulated	GO:0006091	generation of precursor metabolites and energy	6/99	488/28905	0.0122951	3.58979	3.38252	0.00672083	0.00672083	0.0617265	Ogt/Zbtb7a/Ndufs6/Insr/Mtch2/Cox8a	6
Downregulated	GO:0022411	cellular component disassembly	6/99	496/28905	0.0120968	3.53189	3.33436	0.00725418	0.00725418	0.0632938	Smarce1/Ogt/Insr/Nedd9/Lcp1/Lamc1	6
Downregulated	GO:0033674	positive regulation of kinase activity	5/99	355/28905	0.0140845	4.11225	3.45892	0.00758488	0.00758488	0.0648402	Flt1/Pdgfb/Gab1/Insr/Nedd9	5
Downregulated	GO:0072001	renal system development	5/99	359/28905	0.0139276	4.06643	3.42738	0.00793958	0.00793958	0.0648402	Mecom/Col4a1/Pdgfb/Ndufs6/Nrp1	5
Downregulated	GO:0141091	transforming growth factor beta receptor superfamily signaling pathway	5/99	359/28905	0.0139276	4.06643	3.42738	0.00793958	0.00793958	0.0648402	Rnf111/Ogt/Zbtb7a/Numa1/Cdh5	5
Downregulated	GO:1902105	regulation of leukocyte differentiation	5/99	369/28905	0.0135501	3.95623	3.3505	0.00887659	0.00887659	0.0693578	Smarce1/Pbrm1/Zbtb7a/Nedd9/Il2	5

## Sheet: GO terms EC (condensed)
Table S2: Non-redundant GO Biological Process terms enriched in differentially expressed genes in P6 Gpr124 fl/fl vs Gpr124 ΔEC/ΔEC hyaloid endothelial cells. Upregulated and downregulated genes (Gpr124 fl/fl vs Gpr124 ΔEC/ΔEC) were analyzed separately. Inclusion criteria for GO terms: Overlapping genes ≥ 5 and p < 0.01. Redundant and semantically similar terms were consolidated into representati…
Input gene set	ID	Description	GeneRatio	BgRatio	RichFactor	FoldEnrichment	zScore	pvalue	p.adjust	qvalue	geneID	Count
Upregulated	GO:0002181	cytoplasmic translation	10/137	153/28905	0.0653595	13.7899	10.9462	3.31268e-09	3.31268e-09	6.43008e-06	Rpl6/Eif3m/Rpl11/Dhx36/Rpl14/Rpl13a/Rps27a/Rpl35a/Rpl22/Rps2	10
Upregulated	GO:0022613	ribonucleoprotein complex biogenesis	14/137	442/28905	0.0316742	6.6828	8.3084	2.66926e-08	2.66926e-08	2.59058e-05	Rpl6/Rpl11/C1qbp/Rbmx/Rpl14/Rpl13a/Traf7/Rpl35a/Ncl/Npm1/Rrp1/Snrpb/Sfswap/Mrpl20	14
Upregulated	GO:0140694	non-membrane-bounded organelle assembly	12/137	414/28905	0.0289855	6.11552	7.2347	7.06196e-07	7.06196e-07	0.000195823	Rpl6/Rpl11/Cenpa/Atxn2/C1qbp/Tnnt2/Wnk1/Traf7/G3bp1/Npm1/Myh10/Mrpl20	12
Upregulated	GO:0031647	regulation of protein stability	10/137	318/28905	0.0314465	6.63476	6.97251	3.0152e-06	3.0152e-06	0.000523702	Crebbp/Get4/Rpl11/Nedd4l/Bag1/Chp1/Sox17/Serf2/Npm1/Rtn4	10
Upregulated	GO:0006091	generation of precursor metabolites and energy	11/137	488/28905	0.022541	4.75582	5.77444	2.22496e-05	2.22496e-05	0.00254045	Ppp1ca/Gnas/Cox5b/Pdhb/Ppp1cb/Ndufa10/Acat1/Ndufb7/Cox4i1/Ndufc2/Pgls	11
Upregulated	GO:0003007	heart morphogenesis	8/137	294/28905	0.0272109	5.7411	5.63859	8.38011e-05	8.38011e-05	0.00707227	Dag1/Foxc1/Heyl/Sox17/Tnnt2/Tmed2/Fkbp1a/Rtn4	8
Upregulated	GO:0007389	pattern specification process	8/137	491/28905	0.0162933	3.43764	3.75949	0.00242838	0.00242838	0.0425054	Pbx1/Foxc1/Zeb1/Heyl/Sox17/Nr2f2/Tulp3/Tmed2	8
Upregulated	GO:0051051	negative regulation of transport	8/137	497/28905	0.0160966	3.39614	3.71839	0.0026158	0.0026158	0.0426164	Rap1a/Calm3/Nedd4l/Chp1/Atxn2/Ndfip2/Wnk1/Rap1b	8
Upregulated	GO:0009416	response to light stimulus	6/137	333/28905	0.018018	3.80154	3.5484	0.0052077	0.0052077	0.0573184	Crebbp/Dynlrb1/Ppp1ca/Ppp1cb/Dhx36/Npm1	6
Upregulated	GO:0198738	cell-cell signaling by wnt	7/137	464/28905	0.0150862	3.18297	3.27129	0.00677352	0.00677352	0.0630407	Apcdd1/Usp34/Sox17/Fermt2/Wnk1/G3bp1/Tnks2	7
Downregulated	GO:0090287	regulation of cellular response to growth factor stimulus	8/99	327/28905	0.0244648	7.14299	6.54927	1.72617e-05	1.72617e-05	0.0066367	Mmrn2/Pdgfb/Rnf111/Ogt/Zbtb7a/Nrp1/Numa1/Cdh5	8
Downregulated	GO:0040013	negative regulation of locomotion	8/99	364/28905	0.021978	6.41692	6.0971	3.70186e-05	3.70186e-05	0.00748468	Mmrn2/Sema6d/Pdgfb/Ogt/Gtpbp4/Nedd9/Nrp1/Clic4	8
Downregulated	GO:0034329	cell junction assembly	8/99	487/28905	0.0164271	4.79622	4.95306	0.000274899	0.000274899	0.0166052	Tns1/Pdgfb/Ogt/Nrp1/Adgrl1/Rhoc/Cdh5/Lamc1	8
Downregulated	GO:0060562	epithelial tube morphogenesis	6/99	395/28905	0.0151899	4.43498	4.02976	0.00241613	0.00241613	0.0399431	Mmrn2/Flt1/Col4a1/Nrp1/Brpf1/Clic4	6
Downregulated	GO:0008544	epidermis development	6/99	397/28905	0.0151134	4.41264	4.01382	0.00247741	0.00247741	0.0401117	Atp2c1/Gab1/Insr/Numa1/Clic4/Lamc1	6
Downregulated	GO:0021700	developmental maturation	6/99	400/28905	0.015	4.37955	3.99009	0.00257152	0.00257152	0.0412106	Pebp1/Epas1/Pdgfb/Zbtb7a/Adgrl1/Cdh5	6
Downregulated	GO:0016032	viral process	5/99	332/28905	0.0150602	4.39713	3.64971	0.0057574	0.0057574	0.056524	Ccnk/Insr/Nrp1/Tasor/Spcs3	5
Downregulated	GO:0141091	transforming growth factor beta receptor superfamily signaling pathway	5/99	359/28905	0.0139276	4.06643	3.42738	0.00793958	0.00793958	0.0648402	Rnf111/Ogt/Zbtb7a/Numa1/Cdh5	5
