# Supplementary material for: GPR124 regulates hyaloid blood vessel regression and is associated with endothelial-mesenchymal transition
Source: Sci Rep. 2026 Apr 29;16:13765. doi: 10.1038/s41598-026-50835-1 (PMC13128929; doi:10.1038/s41598-026-50835-1)
Supplement: Supplementary file 4 — Supplementary Information 4. [file 41598_2026_50835_MOESM4_ESM.xlsx]

## Sheet: Expressed genes pericytes
Table S3: Genes expressed in P6 hyaloid pericytes. Mean log-normalized RNA expression (UMI counts) from all cells or split by genotype. P, postnatal day; UMI, unique molecular identifier.
	Mean log-normalized UMI counts
Gene	All	Gpr124 fl/fl	Gpr124 ΔEC/ΔEC
Rgs5	4.58569	4.49724	4.64466
mt-Atp6	4.20812	4.1673	4.23533
Col4a1	4.0411	3.83399	4.17918
mt-Co2	4.03514	4.13765	3.96679
Igfbp7	4.03202	3.93216	4.09859
mt-Cytb	3.90246	3.84654	3.93974
mt-Nd4	3.89162	3.89692	3.88809
mt-Co1	3.85856	3.52385	4.0817
mt-Nd1	3.83973	3.89719	3.80142
Mgp	3.83568	3.8713	3.81193
Serpine2	3.82376	3.81776	3.82776
Actb	3.79418	4.10816	3.58486
mt-Nd2	3.77261	3.72071	3.80721
mt-Co3	3.74529	3.41048	3.96849
Nrep	3.69263	3.62283	3.73916
Col4a2	3.58535	3.64853	3.54323
Sparc	3.52849	3.58816	3.48872
Tmsb4x	3.45477	3.67643	3.307
Itga1	3.37831	3.55545	3.26022
Gm42418	3.36111	3.58946	3.20887
Eef1a1	3.30057	3.4863	3.17675
Gnas	3.26407	3.41674	3.16229
Myl6	3.24731	3.42515	3.12876
Fstl1	3.19146	3.34884	3.08654
mt-Nd3	3.17973	2.9134	3.35728
Epas1	3.16344	3.10674	3.20125
Ptma	3.14288	3.42803	2.95278
Tpt1	3.07905	2.88505	3.20838
Malat1	3.03426	2.97592	3.07315
Itm2b	3.01782	3.24308	2.86764
Nid1	3.00851	2.83703	3.12282
Meg3	2.97895	3.38577	2.70775
Cald1	2.9415	3.01404	2.89315
Pdgfrb	2.82632	2.65535	2.9403
Ppia	2.75314	2.70971	2.78209
F2r	2.74236	3.01319	2.5618
Rpl4	2.73673	2.54446	2.86491
Calm1	2.67295	2.70899	2.64893
Actg1	2.67042	2.81997	2.57072
mt-Nd5	2.67028	2.54458	2.75408
Cfl1	2.65572	2.4686	2.78046
H3f3b	2.63618	2.67796	2.60832
Rps8	2.63405	2.5563	2.68589
Nedd4	2.6287	2.81095	2.50721
Marcks	2.6093	2.54963	2.64908
S100a11	2.60862	2.84471	2.45123
Cryab	2.58783	2.75087	2.47913
Rps7	2.56146	2.66717	2.49098
Tmsb10	2.53209	2.2833	2.69795
Serinc3	2.525	2.34035	2.6481
Ccnd2	2.51509	2.50222	2.52368
mt-Atp8	2.51267	2.27279	2.67259
Rpl17	2.50707	1.98605	2.85441
Rps16	2.50639	2.53492	2.48737
Id3	2.49838	2.52369	2.4815
Rps29	2.49428	2.48074	2.50331
Rpl23	2.48875	2.5606	2.44086
Ubb	2.46545	2.28863	2.58333
Notch3	2.45838	2.48564	2.44021
H3f3a	2.44134	2.36582	2.49169
Serpinh1	2.43821	2.34408	2.50096
Rplp1	2.42807	2.26333	2.5379
Rps23	2.4253	2.1381	2.61677
Rpl23a	2.4043	2.24649	2.5095
Tpm4	2.3902	2.5573	2.2788
Cox8a	2.38933	2.44297	2.35357
Sptbn1	2.38386	2.21565	2.49599
Fau	2.3798	2.43982	2.33978
Sept4	2.37658	2.21109	2.48691
App	2.37599	2.49709	2.29526
Cspg4	2.37558	2.07976	2.57279
Rpl18a	2.37453	2.18085	2.50365
Mcam	2.37271	2.75573	2.11736
Rpl13	2.36519	1.85941	2.70238
Mylk	2.33373	2.52612	2.20546
Rps3a1	2.33254	2.35154	2.31988
Myl12a	2.32482	2.13832	2.44914
Bgn	2.31386	2.42073	2.24262
Rps9	2.30618	1.9953	2.51344
Hsp90ab1	2.30033	2.40524	2.2304
Ndufa4l2	2.2924	1.98158	2.49962
Rps24	2.28677	2.37915	2.22519
Rps14	2.27917	2.05783	2.42674
Hspa8	2.27664	1.7448	2.6312
Gnai2	2.26531	1.9131	2.50012
Col1a2	2.26283	2.48993	2.11142
Ywhab	2.26128	2.03672	2.41098
Rps20	2.26104	2.04276	2.40656
Rps4x	2.24816	1.93031	2.46006
Myh9	2.24175	2.29026	2.2094
Rps6	2.24166	2.19519	2.27263
Rps27a	2.23875	1.96198	2.42327
Eef2	2.21206	2.14234	2.25854
Atp1b2	2.20704	2.1152	2.26827
Agrn	2.20642	2.55854	1.97167
Myl9	2.20556	1.90498	2.40595
Acta2	2.20446	2.41526	2.06393
Tuba1b	2.19948	2.04124	2.30496
Lrrc58	2.18666	2.29382	2.11523
Rpl13a	2.17894	2.34156	2.07053
Rpl31	2.16859	1.96206	2.30628
Pcdh18	2.1578	2.38761	2.00459
Nme2	2.15703	1.53958	2.56867
Gng11	2.15091	2.41717	1.9734
Sparcl1	2.12264	1.83358	2.31534
Rpl27	2.11755	2.17494	2.0793
Lamc1	2.11207	2.19372	2.05764
Rpl21	2.11204	2.19274	2.05824
Rpsa	2.09877	2.36986	1.91804
Rpl41	2.0974	1.63207	2.40762
Sept7	2.08893	1.94298	2.18624
Cd81	2.08771	2.31478	1.93633
Ptms	2.08506	1.43904	2.51574
Rpl19	2.08122	1.91774	2.19021
Actn4	2.07594	2.02181	2.11203
Gucy1a1	2.07487	2.26662	1.94703
Rpl39	2.07138	1.80007	2.25226
Heyl	2.06591	1.88275	2.18802
Pabpc1	2.06408	2.09889	2.04086
Itgb1	2.06347	2.16235	1.99755
Nr2f2	2.06038	1.90626	2.16313
Tcf4	2.0442	2.271	1.893
Rplp0	2.03858	1.68551	2.27396
Ebf1	2.03392	2.02506	2.03982
Rps28	2.02622	1.84938	2.14411
Rps11	2.01561	1.90006	2.09265
Ifitm3	1.98551	1.80964	2.10276
Ywhae	1.97465	1.67275	2.17592
Rps19	1.96941	1.59208	2.22096
Cfh	1.96686	1.97183	1.96355
Tns1	1.95463	2.17328	1.80887
Tm4sf1	1.9522	1.75973	2.08052
Rpl7	1.95068	1.8426	2.02273
Rpl26	1.95024	1.43467	2.29395
Rpl24	1.94716	2.16357	1.80289
Lrp1	1.94512	1.6884	2.11626
Tuba1a	1.94369	1.56678	2.19496
Mprip	1.93479	1.84823	1.99249
Rps17	1.93189	1.51137	2.21224
Cnn2	1.92642	2.09812	1.81195
Rpl37	1.92146	1.67229	2.08758
Hnrnpa2b1	1.92119	1.69145	2.07434
Efhd2	1.92056	2.0419	1.83967
Rps26	1.91842	1.91545	1.92041
Ubc	1.9034	1.87519	1.92221
Rps12	1.89926	1.665	2.05544
Cdc42	1.89777	1.56491	2.11968
Rpl5	1.8949	1.8763	1.90731
Marcksl1	1.89044	2.53612	1.45998
Rps21	1.87199	1.67974	2.00015
Cpe	1.87158	1.49673	2.12148
Gja4	1.86467	1.85181	1.87324
Rpl37a	1.86229	1.33874	2.21132
Mfge8	1.85933	1.55026	2.06537
Rps15	1.85927	1.24486	2.26887
Rpl32	1.85417	1.56206	2.04891
Apcdd1	1.85327	1.89098	1.82813
Zbtb20	1.85033	2.12192	1.66927
Ifitm1	1.84792	1.63628	1.98901
Rpl7a	1.83726	1.86707	1.81738
Lpp	1.83579	1.71006	1.91962
Rpl6	1.83182	1.91642	1.77541
Rack1	1.83108	1.41585	2.10789
Ednra	1.82648	1.68685	1.91956
Rps27rt	1.82421	1.61625	1.96285
Rpl34	1.8201	1.45254	2.06515
Rpl11	1.82005	1.91793	1.75479
Eif1	1.81935	1.87701	1.78091
Atp5b	1.8185	1.29711	2.1661
Tpm1	1.80728	2.05	1.64547
Rps10	1.80101	1.32003	2.12166
Ptk2	1.79798	1.81682	1.78543
Rps3	1.79744	1.48343	2.00678
Eif4g2	1.78804	1.69806	1.84803
Rpl38	1.78544	1.61139	1.90147
Sept11	1.78413	1.68862	1.8478
Pcbp2	1.782	1.84415	1.74056
Phlda1	1.77914	1.76018	1.79178
Slc12a2	1.76494	1.90945	1.6686
Oaz2	1.75423	1.90582	1.65317
Prkar1a	1.75183	1.5498	1.88651
Cox7c	1.75021	1.51436	1.90744
Axl	1.74949	1.68057	1.79543
Igfbp4	1.74334	2.06237	1.53066
Rpl12	1.7433	1.51137	1.89792
Fermt2	1.7414	1.4713	1.92146
Laptm4a	1.73907	1.45792	1.9265
Lhfp	1.73793	1.2759	2.04595
Zic1	1.73502	1.82479	1.67518
Rpl15	1.73445	1.49173	1.89626
Atp1a2	1.73004	1.47723	1.89858
Timp2	1.72938	1.23461	2.05922
Ets1	1.72628	2.10836	1.47157
Rpl18	1.72227	1.43785	1.91188
Chchd2	1.72072	1.42756	1.91616
Ddx5	1.72008	1.07246	2.15183
Cst3	1.71282	1.11105	2.114
Rpl27a	1.71036	1.97794	1.53197
Parm1	1.70576	1.56511	1.79953
Tubb5	1.70511	1.91971	1.56205
Cavin1	1.70272	1.86948	1.59155
Tnfaip1	1.70039	1.53785	1.80875
Elob	1.69911	1.63119	1.74439
Rpl35a	1.68557	1.25182	1.97473
Atp5g3	1.68037	1.39351	1.87161
Ube2r2	1.67727	1.66609	1.68472
Rps2	1.67152	1.24428	1.95634
Rpl36	1.67077	1.37085	1.87072
Naca	1.66296	1.23232	1.95005
Anxa2	1.65837	1.60357	1.69491
Rpl28	1.65793	1.34524	1.86639
Arpc2	1.65028	1.64881	1.65126
Capns1	1.64656	1.64406	1.64823
Gapdh	1.6414	1.49869	1.73655
Rps15a	1.64071	1.84215	1.50642
Vim	1.6385	1.98836	1.40526
Oaz1	1.63659	1.65621	1.62351
Flna	1.6315	1.52657	1.70145
Selenow	1.62569	1.63169	1.6217
Lamb1	1.62139	1.53189	1.68107
Rps13	1.62061	1.41239	1.75942
Rpl8	1.61727	1.82769	1.47698
Calm3	1.61344	1.77061	1.50866
Pfn1	1.61139	1.54689	1.65438
Atp5a1	1.60842	2.02197	1.33271
Amotl1	1.60543	1.57569	1.62526
Dync1i2	1.60287	1.72563	1.52103
Prdx1	1.59778	1.71064	1.52254
Cnn3	1.59064	1.68883	1.52519
Myo1b	1.5858	1.22123	1.82884
Igf2r	1.57709	2.0007	1.29469
Lama4	1.57428	1.63778	1.53195
Selenof	1.57406	1.59957	1.55706
Rps18	1.5702	1.25707	1.77895
Akr1a1	1.57013	1.48807	1.62484
Sema6d	1.56902	1.21788	1.80311
Tmem176b	1.5683	1.45116	1.6464
Epb41l1	1.55908	1.88141	1.34419
Uqcrh	1.55475	1.29946	1.72494
Ybx1	1.55336	1.62731	1.50406
Hnrnpk	1.55151	1.43933	1.6263
Pde5a	1.54677	1.50704	1.57326
Abcc9	1.54458	1.37428	1.65811
Col3a1	1.54228	1.80192	1.36918
Csk	1.53957	1.80696	1.36132
Atp5h	1.537	1.19039	1.76806
Rpl10a	1.53674	1.29698	1.69658
Timp3	1.52879	2.11002	1.14131
Rpl3	1.5251	1.21682	1.73062
Fth1	1.52393	1.47301	1.55788
Gpcpd1	1.52358	1.16553	1.76228
Rps25	1.51246	1.31719	1.64264
Serf2	1.50596	1.20522	1.70646
Cox6a1	1.50427	0.828163	1.95501
4931406P16Rik	1.50251	1.81713	1.29276
Lmna	1.50181	1.74684	1.33846
Son	1.49733	1.72772	1.34375
Cltc	1.49319	1.16432	1.71243
Cd248	1.48979	1.26322	1.64084
Ftl1	1.48437	0.995213	1.81048
Arhgef7	1.48118	1.19801	1.66996
Slc25a3	1.47924	1.20978	1.65889
Rpl22	1.47735	1.38176	1.54108
Dmd	1.47608	1.24917	1.62736
Calm2	1.47534	1.51051	1.45189
Kmt2e	1.47381	1.47185	1.47511
Rps5	1.47314	1.21178	1.64739
Ptn	1.46315	1.44413	1.47583
Rhoa	1.46304	1.54294	1.40978
Dact1	1.46006	1.7214	1.28583
Foxc1	1.45634	1.82724	1.20907
Higd1b	1.45541	0.967596	1.78063
Plxnb2	1.44735	1.40156	1.47788
Dynll1	1.4452	1.31952	1.52899
Tln1	1.44268	1.82209	1.18973
Rras	1.43505	1.60305	1.32306
Ndufa13	1.43317	1.23071	1.56814
Uaca	1.43145	1.28747	1.52743
Pten	1.4298	1.16862	1.60393
Dag1	1.42132	1.24787	1.53695
Prdx5	1.42068	0.881497	1.78014
Atp5j2	1.41911	1.29488	1.50194
Cd93	1.41821	1.85699	1.1257
Postn	1.41594	0.963065	1.71785
Itm2c	1.41486	0.937282	1.73324
Slc25a4	1.41486	1.54667	1.32698
Dleu2	1.41277	1.78436	1.16505
Crip2	1.40939	1.46039	1.37539
Eif5a	1.40651	1.40629	1.40666
Pea15a	1.40637	0.870958	1.76331
Gng5	1.40513	1.31014	1.46845
Prkcb	1.40481	1.21262	1.53293
Ldha	1.40366	1.54866	1.30699
Actn1	1.40218	1.61023	1.26348
Eif4a1	1.39687	0.81804	1.78276
Ppib	1.39504	1.11185	1.58383
Bmpr2	1.39135	0.664903	1.87565
Maged2	1.38612	1.14687	1.54562
Fkbp1a	1.38581	1.43526	1.35284
Actc1	1.38578	1.77038	1.12938
Ankrd50	1.37958	1.4164	1.35502
Purb	1.37858	1.48579	1.3071
Lgals1	1.37813	1.49356	1.30118
Anxa6	1.37775	1.19875	1.49708
Cox4i1	1.3726	0.827006	1.73633
mt-Nd4l	1.371	1.42543	1.33472
Anxa5	1.36993	1.62408	1.20049
Rbms1	1.3669	1.29405	1.41546
Rhob	1.3605	1.48059	1.28043
Hmgb1	1.35972	1.39047	1.33922
Gucy1b1	1.35906	1.1296	1.51203
Aldoa	1.35848	1.05214	1.56271
Hnrnpab	1.35682	0.860519	1.68769
Hnrnpa3	1.34952	0.831774	1.69468
Atp5g2	1.34544	1.26241	1.40079
Tmbim6	1.34498	1.21292	1.43302
Dkk3	1.34281	1.36933	1.32513
Actr3	1.34271	1.21023	1.43103
Rpl29	1.33806	0.9015	1.62909
Wls	1.33716	1.65815	1.12317
B2m	1.33626	1.39698	1.29577
Heg1	1.33413	1.33896	1.33092
Vcl	1.3287	1.37871	1.29535
Tspan6	1.32707	1.68124	1.09096
Hnrnpu	1.31814	1.18335	1.40799
Ywhaz	1.31588	1.18493	1.40318
Sf3b1	1.31155	1.45355	1.21688
Sumo2	1.31143	1.2209	1.37178
Tbx2	1.31027	0.652141	1.74902
S1pr3	1.30995	0.951008	1.54925
Loxl2	1.30621	1.11792	1.43173
Tmem59	1.30325	1.49216	1.17732
Rpl9-ps6	1.29922	0.965504	1.5217
Arhgdib	1.29732	0.939612	1.5358
Atp5o	1.29726	1.4271	1.2107
Txn1	1.29493	1.14985	1.39166
Hspa5	1.29326	1.33163	1.26768
Arhgef17	1.28993	1.49486	1.15331
Prdx2	1.28826	1.29075	1.2866
Ctnnb1	1.2858	1.06267	1.43456
Arpc5	1.28351	1.57493	1.08923
Tns3	1.27855	1.51149	1.12326
M6pr	1.27704	1.79397	0.932419
Ajuba	1.27691	1.27186	1.28028
Hsp90b1	1.27639	1.37986	1.20741
Ran	1.27262	1.22048	1.30738
Ddx17	1.2711	1.21726	1.30699
Atp5j	1.26538	1.18781	1.3171
Akap12	1.26469	1.31116	1.23372
Aspn	1.26293	1.05686	1.4003
Capzb	1.26281	1.27431	1.25515
Gnb4	1.25554	1.17199	1.31124
Tceal9	1.25498	0.996084	1.42758
Ctnna1	1.25497	1.69581	0.96107
Gabarap	1.25452	1.45905	1.11816
Slc25a5	1.253	1.02668	1.40388
Calr	1.2496	1.18131	1.29513
Pkm	1.24313	1.3285	1.18622
Daam2	1.24256	1.03977	1.37775
Picalm	1.24224	1.41216	1.12897
Rac1	1.24203	1.02449	1.38706
Jag1	1.24091	0.848423	1.50256
Map3k20	1.24047	1.52083	1.05357
Rbm39	1.24036	1.19911	1.26786
Tagln2	1.23728	1.36714	1.1507
Zeb2	1.2368	1.30129	1.1938
Lamp1	1.2359	1.02174	1.37867
Uba1	1.2358	1.31271	1.18453
Cox6b1	1.23334	0.675809	1.60502
Pcbp1	1.23316	1.47654	1.07091
Utrn	1.2317	1.29351	1.1905
Ddx3x	1.23002	1.6826	0.928302
Lasp1	1.22707	1.5182	1.03299
Epb41l2	1.22507	0.830689	1.48799
Sept8	1.22267	1.13511	1.28104
Ahnak	1.21972	1.53696	1.00823
Eid1	1.21717	1.75864	0.856187
Ptp4a3	1.21396	0.9232	1.4078
Rbm3	1.21351	0.906608	1.41811
Kif5b	1.2132	1.23938	1.19574
Hnrnpf	1.21241	1.2291	1.20129
Rab11b	1.21237	1.27172	1.1728
Rpl30	1.21055	0.876248	1.43341
Gpx4	1.21024	1.18062	1.22998
Nisch	1.20965	0.658114	1.57734
Eef1b2	1.20942	1.22134	1.20148
Nbl1	1.20919	1.33548	1.12499
Cxxc5	1.2078	0.877431	1.42805
Arf1	1.20237	1.56082	0.963398
Higd2a	1.20168	1.29811	1.13739
Impad1	1.19852	1.54561	0.967131
Mxd4	1.1921	1.27961	1.13376
Rbpms	1.19053	1.07542	1.26726
Ubr5	1.187	0.882968	1.38968
Clic4	1.18458	1.45936	1.00139
Pdzd2	1.18414	1.62023	0.893407
Sem1	1.17984	0.830487	1.41274
Atp6v0c	1.16745	0.964146	1.30299
Csnk1a1	1.16531	0.729883	1.45559
Arhgap42	1.16204	0.953556	1.30103
Cd63	1.16182	0.848423	1.37076
Pdlim1	1.16174	1.19077	1.14238
Cdc42ep4	1.16062	1.119	1.18837
Sdc2	1.16052	1.01824	1.25537
Mtpn	1.16051	1.12338	1.18526
Zmynd11	1.15628	1.31811	1.0484
Plat	1.15611	0.880186	1.34007
Zfhx3	1.15498	1.22049	1.11131
Zfp703	1.15478	1.01964	1.24487
Lims1	1.15477	0.988741	1.26546
Gnb1	1.1517	1.3195	1.03982
Atpif1	1.1507	0.685832	1.46061
Mdh1	1.14962	1.04178	1.22152
Mapre1	1.14935	1.1831	1.12686
Rgs7bp	1.14799	1.0949	1.18338
Ccni	1.14651	1.23126	1.09002
Ucp2	1.14398	1.38761	0.98155
Eif4h	1.14392	0.936143	1.28244
Reep3	1.14378	1.10127	1.17212
Prrx1	1.14175	1.01072	1.22911
Map1lc3b	1.14046	1.44149	0.93977
Zfr	1.13805	0.886222	1.30593
Npm1	1.13719	0.91716	1.28388
Cox6c	1.13512	0.928488	1.27288
Sox4	1.13467	1.35423	0.988292
Cisd3	1.12822	0.910526	1.27336
Mbnl2	1.12466	1.03861	1.18204
Zfp36l1	1.12451	0.885963	1.28355
Uba52	1.12442	1.29701	1.00937
Cbfa2t3	1.12279	0.836101	1.31391
Unc5b	1.12271	1.21115	1.06375
Specc1	1.11946	1.51714	0.85433
Kcnj8	1.11911	0.874215	1.28238
Ppp2ca	1.11903	1.11792	1.11978
Ccn2	1.11862	0.939366	1.23812
Atp5k	1.11711	0.768841	1.34929
Fus	1.11652	1.22843	1.04191
Pttg1ip	1.11596	0.999856	1.19336
Spry1	1.11482	1.10267	1.12293
Sod1	1.11434	0.848418	1.29162
Tmem50a	1.11222	0.852104	1.28563
Gdi1	1.11113	1.19796	1.05325
Plce1	1.11091	1.13132	1.0973
Aplp2	1.10991	1.22607	1.03247
Morf4l1	1.10899	1.38885	0.922418
Dennd5a	1.10885	0.816039	1.30406
Mcl1	1.1078	1.06675	1.13518
Atp5e	1.10658	1.40787	0.905718
Dynlrb1	1.10394	1.28018	0.986441
Ndufb1-ps	1.10318	0.717741	1.36014
Rplp2	1.10226	0.594167	1.44099
Mif	1.10225	1.08199	1.11576
Ifitm2	1.09956	0.715308	1.35572
Pitpnc1	1.09825	0.975329	1.18021
Bsg	1.09467	1.07967	1.10466
Plekhg2	1.09427	0.960503	1.18345
Micos10	1.09269	1.49535	0.824257
Atxn7l3b	1.09266	1.37132	0.906887
Serbp1	1.09189	0.953463	1.18417
Psmb3	1.09174	0.951527	1.18521
Rpl10-ps3	1.0913	1.02695	1.1342
Iqgap1	1.09116	1.40839	0.87967
Gjc1	1.08235	1.40777	0.865411
Nudt4	1.08165	1.02853	1.11707
Grcc10	1.08141	1.04697	1.10438
Psmd8	1.08118	0.835175	1.24518
Pygm	1.08073	1.45524	0.831056
Farp1	1.08072	0.766995	1.28988
Dlc1	1.07966	0.785871	1.27551
Tspan3	1.0794	1.08611	1.07493
Pid1	1.07917	1.3446	0.902211
Mfap2	1.07871	1.39401	0.868517
Itga7	1.07763	0.616723	1.3849
Lzts2	1.07648	1.4533	0.825256
Btg1	1.076	0.738693	1.30086
Lrrc8b	1.07509	1.03459	1.1021
Loxl3	1.07494	0.98509	1.13484
Dst	1.07359	1.37986	0.869412
Vasp	1.06797	1.14196	1.01865
Ptbp3	1.06749	1.29336	0.916903
Gnb2	1.0669	0.959323	1.13861
Cmtm3	1.06621	1.35623	0.872867
Adgrl1	1.06348	1.20072	0.971994
Eif4ebp2	1.06073	0.848316	1.20235
Gpx1	1.06018	0.987704	1.10849
Ndufc2	1.05959	0.878969	1.18001
Ssb	1.05957	0.6205	1.35229
Pdgfa	1.0583	1.25332	0.928289
Gm13889	1.05773	0.700723	1.29573
Grb10	1.05704	0.896744	1.1639
Psmb4	1.05693	0.682028	1.30687
Wdr89	1.05626	0.920537	1.14674
U2af2	1.05534	0.566522	1.38123
Bmp1	1.05129	0.627238	1.33399
Tcf12	1.05108	1.18212	0.963714
Ski	1.04975	1.28663	0.891826
Tnks1bp1	1.0492	1.28625	0.891177
Nckap1	1.04612	1.19745	0.945244
Canx	1.04496	0.789661	1.21517
Chmp4b	1.04495	1.44059	0.781195
Set	1.04449	1.15746	0.969178
Lima1	1.04383	1.1099	0.999785
Lsm14a	1.04382	1.32998	0.853045
Hsp90aa1	1.04228	0.99336	1.07489
Sema5a	1.04173	0.611857	1.32831
Trib2	1.03991	1.27945	0.880214
Vdac1	1.038	1.10532	0.993126
Atp5d	1.03792	0.727788	1.24467
Mdk	1.03752	1.31364	0.853441
Ptpn11	1.0368	1.14079	0.967483
Itgav	1.03461	1.22736	0.90611
Ifi203	1.03351	0.28942	1.52957
Eva1b	1.03314	0.698795	1.25603
Aco2	1.02593	1.13526	0.953048
Rpl14	1.02473	0.72745	1.22292
Csde1	1.02458	1.31214	0.832875
Atp5f1	1.02388	0.52088	1.35922
Hnrnpm	1.02348	0.943532	1.07677
Ube3a	1.02321	1.17662	0.920945
Vdac2	1.02307	1.12292	0.956501
Atp5md	1.02273	1.36488	0.794621
Sh2b3	1.02201	1.40913	0.763925
Tm9sf3	1.02148	1.16585	0.925237
Bzw1	1.01797	0.918978	1.08396
Tra2b	1.01761	1.42888	0.743424
Rock2	1.01735	1.0459	0.998317
Des	1.01629	0.782758	1.17198
Ogn	1.01518	1.54431	0.662421
G3bp1	1.01422	1.3283	0.804837
Dstn	1.01305	1.24754	0.856718
Ndufb2	1.01276	0.526443	1.33698
H19	1.01224	1.10633	0.949506
Sptan1	1.01158	1.26991	0.839358
Tjp1	1.01126	0.635741	1.2616
Pik3ca	1.00997	0.898269	1.08444
Cobll1	1.00854	0.556008	1.31023
Tacc1	1.00761	1.30981	0.806143
Jak1	1.00714	0.776991	1.16057
Prelid1	1.0059	1.1265	0.925493
Ewsr1	1.00586	0.539844	1.31653
Itpkb	1.00565	1.23565	0.852306
Arhgap1	1.00507	1.03163	0.98737
Ndfip1	1.00285	0.880182	1.08462
Rab14	1.00208	1.10406	0.934093
Ndufa2	0.998957	0.857376	1.09334
Atp2a2	0.998193	1.02166	0.982546
Inpp4b	0.996055	0.741154	1.16599
Coro2b	0.996008	0.772082	1.14529
Cdkn1c	0.995057	0.627334	1.24021
Tbxa2r	0.994514	0.243806	1.49499
Ckap4	0.992893	0.815077	1.11144
Apbb2	0.992783	0.676164	1.20386
Atp6v1d	0.992499	1.40099	0.720174
Rbms3	0.990154	0.730951	1.16296
Hes1	0.98804	1.30819	0.774604
Phldb2	0.987818	0.64716	1.21492
Arid1a	0.987791	1.38023	0.726166
Hdac7	0.987147	0.565979	1.26793
Tead1	0.986284	0.862043	1.06911
Vstm4	0.986227	0.835705	1.08658
Crip1	0.986131	0.843473	1.08124
Ndufb3	0.985935	0.953737	1.0074
Ap2s1	0.985325	0.913303	1.03334
Prrc2b	0.985285	1.01953	0.962458
Kctd10	0.985256	1.02012	0.962012
Pcolce	0.985121	0.627532	1.22351
Pfdn5	0.985006	1.17077	0.86116
Fkbp8	0.982271	0.907161	1.03235
Msi2	0.982029	0.658813	1.19751
Adcy6	0.981617	1.09823	0.903873
Src	0.981316	1.5913	0.574661
Prkacb	0.98079	1.22721	0.816512
Chd4	0.977338	1.19131	0.834692
Pafah1b1	0.976046	0.940244	0.999914
Stk39	0.975858	0.947603	0.994694
Mdh2	0.975033	0.85436	1.05548
Idh3b	0.971914	1.02751	0.934849
Nes	0.971599	0.746215	1.12186
Sub1	0.969459	0.705202	1.14563
Rrbp1	0.968312	0.999797	0.947323
Cdk6	0.968241	0.81512	1.07032
Arhgdia	0.968043	1.00736	0.941832
Thra	0.96744	0.746215	1.11492
Hspb1	0.967432	1.0459	0.915123
Pakap.1	0.96738	1.18908	0.819581
Msl1	0.960805	0.902189	0.999882
Ncor1	0.960142	1.10848	0.861247
Srrm2	0.959317	0.465344	1.28863
Srsf2	0.959178	0.717577	1.12025
Spcs1	0.958083	1.11064	0.856375
Raph1	0.957835	0.786976	1.07174
Dock6	0.957732	1.19202	0.80154
Gm10800	0.956609	0.724463	1.11137
Rhoj	0.955236	0.647271	1.16055
Adgra2	0.954389	0.814852	1.04741
Hnrnpc	0.953231	0.835918	1.03144
Mat2a	0.952985	1.19447	0.791992
Puf60	0.952513	0.861653	1.01309
Afap1l2	0.950105	0.785096	1.06011
Qk	0.949002	1.04143	0.887383
Cldnd1	0.9488	1.17761	0.796261
Snx3	0.948527	0.677889	1.12895
Uqcrb	0.948501	1.2129	0.772238
Top1	0.945811	1.28682	0.71847
Pkd1	0.944942	1.04587	0.87766
Rps27l	0.944599	0.364779	1.33115
Wasf2	0.94423	1.22096	0.759742
Atp5c1	0.943901	0.664274	1.13032
Ctdsp2	0.943381	0.666303	1.1281
Cycs	0.943301	0.850262	1.00533
Sfpq	0.941979	0.877082	0.985244
Dnmt3a	0.940115	1.08879	0.840997
Ccnd3	0.93779	0.667892	1.11772
Grn	0.937026	0.64971	1.12857
Tma7	0.936682	0.892919	0.965858
Camk2n1	0.936043	0.813804	1.01754
Hnrnpa1	0.935365	1.00606	0.888234
Pbrm1	0.935124	0.481327	1.23766
Dtx3	0.934601	0.814904	1.0144
Rbbp7	0.934588	0.694637	1.09455
Eif2s2	0.932263	0.731183	1.06632
Itga4	0.932246	1.12967	0.800629
Agap1	0.931825	0.790994	1.02571
Elmo2	0.931441	0.959323	0.912854
Akt1	0.931168	1.04439	0.855689
Srsf3	0.930686	1.30576	0.680638
Ncam1	0.930499	1.18671	0.759694
Tmem30a	0.929501	1.00531	0.87896
Jun	0.927702	0.663224	1.10402
Tagln	0.926625	1.18472	0.754562
Tax1bp3	0.92655	1.13774	0.785758
Mef2d	0.926527	1.45956	0.571175
Mark1	0.9257	0.979044	0.890137
C1qtnf6	0.923692	0.870138	0.959395
Trim28	0.923052	1.34743	0.640136
Rsu1	0.922659	1.14524	0.774274
Itgb5	0.919589	0.658838	1.09342
Spry4	0.915555	1.11612	0.781841
Pdha1	0.915452	1.21384	0.716528
Sri	0.91441	1.02706	0.839311
Ctnnd1	0.913582	1.18835	0.730406
Filip1l	0.913011	0.681195	1.06755
Dlk1	0.9129	1.33625	0.630664
H2afz	0.91234	0.573969	1.13792
Dgkh	0.91228	1.30595	0.649836
Ncl	0.911327	0.631953	1.09758
Vcp	0.910322	0.708738	1.04471
Fat1	0.908991	0.805214	0.978176
Peak1	0.908403	1.23751	0.689001
Csnk1d	0.908249	0.930552	0.89338
H13	0.907484	0.589781	1.11929
Mrfap1	0.90701	0.706401	1.04075
Dync1h1	0.90639	0.86891	0.931377
Tm9sf2	0.906309	0.776334	0.992959
Rtn4	0.904887	1.01167	0.833699
Psma5	0.903493	0.544084	1.1431
Hmgn1	0.902437	0.896166	0.906618
Map4	0.901931	0.734967	1.01324
Uqcrc2	0.901087	0.929728	0.881993
2310022B05Rik	0.900872	1.30001	0.634778
Snrk	0.89998	0.868504	0.920965
Nuak1	0.895671	1.13884	0.733561
Cdc42bpa	0.894717	1.22636	0.673622
Armcx3	0.89424	1.13222	0.735589
P3h3	0.893351	1.07004	0.77556
Tmed2	0.893222	1.02286	0.806796
Cdh6	0.892353	0.97556	0.836882
Spred1	0.89153	1.51089	0.478626
Ssr3	0.891453	0.867493	0.907426
Sh3bgrl	0.891331	0.908683	0.879763
Snrnp70	0.891243	1.00305	0.816702
Paip2	0.891199	0.991018	0.824652
Tgfb2	0.890956	1.41314	0.542832
Nedd8	0.889915	0.626253	1.06569
Esyt1	0.889069	1.20751	0.676776
Lbh	0.888011	0.839198	0.920554
Fam129b	0.886144	0.888735	0.884417
Myadm	0.886043	1.21752	0.665061
Usp9x	0.885191	0.881723	0.887503
Sh3glb1	0.885093	1.33243	0.58687
Rpl36a	0.884358	0.373151	1.22516
Stard13	0.88346	0.539613	1.11269
Tns2	0.883339	1.11802	0.726886
Oip5os1	0.882755	0.564659	1.09482
Ndufb10	0.881553	0.733704	0.980119
Tardbp	0.880638	0.525035	1.11771
Wdr26	0.880461	0.853434	0.898478
Acadl	0.879779	1.2162	0.655498
Prrc2a	0.879608	0.545134	1.10259
Fry	0.877721	0.855403	0.8926
Jund	0.877251	0.738921	0.969471
Sdhc	0.873248	0.696726	0.990928
Eif4b	0.871636	1.0266	0.768329
Brd3	0.870778	1.06057	0.744252
Tcf7l1	0.87072	1.06666	0.740094
Snhg18	0.869146	0.51623	1.10442
Arhgef1	0.868538	1.16987	0.667649
Rnf10	0.866958	0.718776	0.965746
Col5a2	0.866078	0.887875	0.851546
Cyb5r3	0.865792	0.525035	1.09296
Zbtb34	0.865658	0.84801	0.877424
Srsf11	0.865355	0.980964	0.788283
Arpc1b	0.86535	0.742984	0.946927
Ppic	0.864629	1.13541	0.68411
P4hb	0.863295	0.689194	0.979362
Caprin1	0.862843	1.02407	0.755359
Bnip3l	0.862357	0.808045	0.898565
Actr2	0.862126	0.627238	1.01872
Dnajc8	0.861963	0.947802	0.804737
Ilk	0.86183	0.817825	0.891166
Tspan12	0.86124	0.991496	0.774402
Dpysl2	0.860793	0.820477	0.887671
Sec62	0.860406	0.142588	1.33895
Mndal	0.859465	1.10918	0.692985
Phc2	0.859375	0.801673	0.897843
Tnks2	0.859125	1.06267	0.723429
Wdr1	0.858129	0.919905	0.816945
Selenom	0.857856	0.368997	1.18376
Psap	0.857615	0.857376	0.857774
Ftl1-ps1	0.856765	0.623335	1.01239
Sf1	0.856149	0.62692	1.00897
Ndufb9	0.85543	0.863049	0.85035
Ost4	0.855015	0.989192	0.765564
Cox7a2	0.853866	0.93499	0.799783
Uba2	0.853463	0.348541	1.19008
Arpc4	0.852685	0.814012	0.878468
Sdc3	0.852072	0.860529	0.846435
Rap2a	0.851148	0.979913	0.765304
Ssr1	0.850289	0.89532	0.820269
Spon2	0.849403	0.822042	0.867644
Drap1	0.849276	0.61804	1.00343
Tmed10	0.848732	0.734093	0.925158
Add1	0.847286	0.934321	0.789263
Gdi2	0.84728	0.851455	0.844497
Ndufb6	0.845867	0.668824	0.963896
Sec14l1	0.84485	1.02923	0.721932
Slc44a2	0.844075	0.846279	0.842605
Rtl8a	0.84167	0.82848	0.850463
Atp13a5	0.839759	0.261728	1.22511
Anxa1	0.839069	0.736623	0.907366
Tnrc6a	0.839009	1.00006	0.731643
Tomm6	0.838757	0.788165	0.872485
Nono	0.838697	0.896673	0.800046
Crebbp	0.838051	1.24726	0.565243
Amfr	0.837663	0.981523	0.741756
Pdap1	0.837352	1.05207	0.694208
Pear1	0.836333	0.948734	0.7614
Pgam1	0.835641	0.885356	0.802498
Mmp14	0.834994	0.847792	0.826463
Rab10	0.833992	0.960806	0.749449
Fyn	0.833949	0.630308	0.96971
Gtf2i	0.833799	0.612407	0.981394
Cdh11	0.832788	0.693736	0.925489
Kank2	0.832438	0.714486	0.911072
Egflam	0.830601	0.890301	0.790801
Tsn	0.830269	0.368997	1.13778
Mgll	0.830076	0.680702	0.929658
Prkar2b	0.829455	1.07597	0.66511
Cacna2d1	0.828473	0.746903	0.882853
Ralgapa1	0.826785	0.860519	0.804295
Tcaf1	0.82568	0.602783	0.974278
Nkd1	0.825191	0.444141	1.07922
Clcn4	0.823296	0.448914	1.07288
Ppp1r12a	0.822944	0.61804	0.959548
Cox7b	0.821406	1.07756	0.650635
Gclm	0.819679	0.624927	0.949515
Brd4	0.818325	0.644129	0.934455
Kpnb1	0.818076	1.01672	0.685645
Gfra2	0.816946	0.727018	0.876897
Samd4	0.816805	1.4908	0.367477
Golim4	0.816623	0.527905	1.0091
Esam	0.816093	1.07433	0.643934
Gcnt2	0.815968	0.84573	0.796126
Fndc3b	0.815834	0.548523	0.994041
Trir	0.815267	1.35877	0.452933
Zbtb4	0.814251	0.936143	0.732989
Crim1	0.813829	0.700696	0.889251
Ctsb	0.813545	0.850821	0.788693
Uqcrq	0.81339	0.794493	0.825987
Adgre5	0.812183	0.892371	0.758725
Atp5l	0.811887	0.994469	0.690166
Xist	0.81188	1.41516	0.409692
Map4k4	0.810991	1.13916	0.592212
Limd1	0.810793	1.14636	0.587083
Dad1	0.810294	0.646314	0.919613
Fads3	0.809709	0.672812	0.900973
Hsbp1	0.809175	0.822274	0.800442
Ak3	0.808402	0.659211	0.907862
Abhd4	0.808335	0.813282	0.805037
Lamb2	0.808183	0.517545	1.00194
Maged1	0.807877	0.723693	0.863999
Aebp2	0.806338	0.445519	1.04688
Ube2i	0.805211	0.607183	0.93723
Cstb	0.804965	0.719236	0.862118
Rab5c	0.8038	0.726603	0.855264
Sh2d3c	0.80348	1.24972	0.505987
Macf1	0.803058	0.790037	0.811739
Krtcap2	0.80145	0.867943	0.757122
Pcdh1	0.801402	0.879602	0.749269
Rasl12	0.800665	0.665457	0.890804
Hnrnpa0	0.80029	0.813536	0.791459
Atn1	0.799751	0.791616	0.805174
Tecpr1	0.799438	0.630666	0.911952
Ube2d3	0.799266	1.18005	0.545413
Cox5a	0.799072	0.915915	0.721176
Svil	0.798942	0.827121	0.780156
Cnbp	0.798053	0.535517	0.973078
Nbr1	0.797653	1.25646	0.491784
Pik3r1	0.797531	0.623335	0.913661
Ldb1	0.797433	0.80027	0.795542
Egr1	0.796675	0.648583	0.895402
Foxs1	0.796579	0.773327	0.81208
Nptn	0.796542	0.548557	0.961865
Cox5b	0.796317	0.896593	0.729466
Sh3bgrl3	0.796163	0.493856	0.9977
Endod1	0.796044	0.624407	0.910468
Capza2	0.79595	0.419468	1.04694
Ndfip2	0.795588	0.934071	0.703266
B230219D22Rik	0.795508	0.912552	0.717479
Ctsz	0.795165	0.77663	0.807521
Slc9a3r2	0.794152	1.1644	0.547319
Ift20	0.793796	0.669026	0.876976
Fkbp9	0.792909	1.03414	0.632091
Tle5	0.792757	0.302931	1.11931
Pcdh19	0.789897	0.612996	0.907831
Dctn1	0.789424	0.527676	0.963922
Atp5g1	0.789195	1.00648	0.644335
Mlf2	0.789091	0.566696	0.937355
Fam168b	0.789026	0.980494	0.661381
Vapa	0.788381	1.07708	0.595912
Tet3	0.787704	1.15422	0.543359
Mef2c	0.787133	0.697659	0.846783
Sdhb	0.785955	1.06253	0.601572
Rab5if	0.785187	0.735373	0.818396
Psmd1	0.78438	1.05172	0.606153
Tgfb1i1	0.783206	0.389484	1.04569
Cpq	0.782738	0.970072	0.657849
Rtn3	0.7824	1.00197	0.636017
Pkd2	0.782256	0.686045	0.846397
Prrc2c	0.782175	0.708344	0.831395
Stc1	0.78134	0.579393	0.915971
Kdelr2	0.781145	1.07413	0.585825
Ywhaq	0.780847	1.00196	0.63344
Ube2d2a	0.780729	0.768841	0.788654
Ctsl	0.779782	0.7751	0.782904
Wipi1	0.779396	0.819875	0.75241
Psmb7	0.779339	0.650824	0.865015
Banf1	0.778467	0.755497	0.79378
Rab2a	0.777865	0.864213	0.7203
Mtch1	0.777113	0.743085	0.799799
Arhgef12	0.776839	1.38138	0.373812
Ecm2	0.776715	0.761935	0.786567
9530068E07Rik	0.775685	0.857802	0.72094
Hnrnpd	0.774959	0.989693	0.631803
Eno1	0.774608	0.28942	1.09807
Rhoc	0.773832	0.940043	0.663024
Gpx8	0.773277	1.01279	0.613604
Foxf2	0.773045	0.966155	0.644305
Pdlim2	0.773002	0.87959	0.701943
Gm10801	0.771226	0.635308	0.861837
Sf3b6	0.76997	0.718832	0.804062
Tab2	0.769954	0.942031	0.655236
Srsf5	0.769393	1.0062	0.611524
Kcnq1ot1	0.76884	0.341056	1.05403
Lrp6	0.768412	0	1.28069
Ap2m1	0.768215	1.4508	0.313157
Sf3b2	0.767999	0.336838	1.05544
Tmem86a	0.767044	0.483644	0.955977
Eng	0.766528	0.302931	1.07559
Klhl23	0.766449	1.06838	0.565159
Copg1	0.766279	0.969256	0.630961
Ehd2	0.766227	0.527676	0.925261
Limd2	0.765871	0.720772	0.795937
Nfic	0.765708	1.43461	0.319772
Pnisr	0.765398	0.593235	0.880173
Nfat5	0.765281	0.924977	0.658816
Slc19a1	0.764648	0.345912	1.04381
Rabac1	0.763309	0.116049	1.19482
Hspe1	0.762883	0.723861	0.788897
Metap2	0.762088	0.689597	0.810416
Abi1	0.761561	0.823783	0.72008
Ppp1ca	0.761181	0.659082	0.829247
Sp6	0.761045	1.06838	0.556156
Eif3c	0.760922	0.638496	0.842539
Nf1	0.760491	1.1584	0.495218
Ergic3	0.759846	0.735401	0.776143
Zfp362	0.758937	0.614162	0.855453
Eif5b	0.758576	0.681509	0.809954
Ggt5	0.758314	0.516225	0.919706
Enpep	0.757771	0.779268	0.74344
Trip12	0.75771	1.15768	0.491065
Sbno1	0.757638	0.763171	0.75395
Armcx2	0.757599	0.968124	0.617249
Tmpo	0.75731	0.520538	0.915157
Ifngr2	0.757017	0.688101	0.802962
Fn1	0.756761	0.576648	0.876835
Gng2	0.7567	0.847518	0.696155
Ppt1	0.75653	0.67628	0.810029
Eif3a	0.756447	0.305654	1.05698
Isyna1	0.755045	0.498496	0.926078
Eif3f	0.755017	0.786575	0.733978
Pbx1	0.753776	1.08328	0.534104
Anxa3	0.753612	0.813588	0.713628
Zfp207	0.752543	0.501649	0.919806
Rasgrp2	0.749381	0.599925	0.849018
Marveld1	0.749312	0.832768	0.693675
Ifi27	0.749004	0.404756	0.978502
Arglu1	0.748688	0.548057	0.882443
Cd151	0.747982	0.610555	0.839601
Tnfrsf19	0.747513	0.757999	0.740523
Srsf1	0.747294	0.984405	0.58922
Stk40	0.746928	0.793917	0.715601
Clip1	0.746862	0.377721	0.992956
Ndufs2	0.746777	0.515899	0.900696
Ugp2	0.746364	1.04234	0.549047
Rgs3	0.746072	0.877933	0.658164
1810058I24Rik	0.745916	1.04519	0.546397
Ranbp1	0.745468	0.956156	0.60501
Rnf11	0.744876	0.423391	0.9592
Btf3	0.744669	0.785443	0.717486
Foxq1	0.744398	0.63668	0.81621
Uchl1	0.743876	0.64005	0.813094
Psmc3	0.742731	0.644175	0.808435
Ndufs4	0.741694	0.727419	0.751211
Ube2s	0.740567	0.72745	0.749311
Lef1	0.740227	0.943929	0.604426
Chmp2a	0.740094	0.565979	0.85617
Cop1	0.738961	0.838376	0.672684
Tmem204	0.738745	0.82778	0.679389
Art3	0.738323	0.607178	0.825753
Rock1	0.737728	0.539844	0.86965
Rab7	0.735362	1.1631	0.450204
Msn	0.734927	1.00715	0.553442
Colec12	0.733068	1.01652	0.544098
Kctd17	0.733055	0.607813	0.81655
Clic1	0.732461	0.769307	0.707897
Pip5k1c	0.731271	0.681509	0.764447
Usp19	0.731233	0.6588	0.779521
Gm16286	0.730988	0.755584	0.71459
Srek1	0.73045	0.965264	0.573907
Cct4	0.728908	0.7563	0.710646
Gas5	0.728621	0.59572	0.817221
Psmc6	0.728307	0.505533	0.876823
Fkbp10	0.72774	0.619324	0.800018
Stat3	0.727295	1.07917	0.49271
Rdx	0.727163	0.729614	0.725529
Atp5mpl	0.727042	0.919204	0.598934
Tram1	0.726397	0.768806	0.698124
Cox4i2	0.726379	0.737014	0.719289
Ube2n	0.724894	0.57104	0.827463
Coro1c	0.72469	0.493769	0.878637
Stard8	0.723148	0.189605	1.07884
Bcam	0.722596	0.694401	0.741393
Ppm1a	0.722482	0.884583	0.614415
Timm23	0.722212	0.947248	0.572189
Cops9	0.722112	0.609905	0.796917
Nsd1	0.722035	0.576648	0.81896
Anapc11	0.721369	0.5443	0.839415
Bloc1s1	0.721276	0.646709	0.770987
Hcfc1	0.721222	0.88664	0.610943
Lgals9	0.721203	0.438262	0.90983
Ppp1cb	0.720114	0.82833	0.647971
Golga7	0.718959	0.656586	0.760542
Hmox2	0.718663	1.0027	0.529304
Il34	0.718101	0.828367	0.644589
Plekha2	0.717873	0.526443	0.845493
Junb	0.717455	0.400176	0.928975
Ttc3	0.716759	0.553379	0.825679
Eef1g	0.716435	0.808929	0.654773
Dlgap4	0.716299	0.565786	0.816641
Dkk2	0.715919	0.790037	0.666507
Ppfibp1	0.714455	0.848022	0.62541
Nfia	0.714306	0.867906	0.611905
Atp7a	0.713883	0.531222	0.835657
Zfp553	0.713013	0.741448	0.694057
Zcchc14	0.71287	0.717281	0.70993
Arpc1a	0.712862	0.827967	0.636126
Etv1	0.712559	0.887766	0.595755
Tnfrsf21	0.71153	0.619347	0.772986
Cct2	0.711262	0.302931	0.983482
Hnrnph1	0.710782	0.576648	0.800205
Ankrd17	0.71024	1.16027	0.410221
Srpr	0.70974	0.819644	0.63647
Atp1b3	0.709563	0.336838	0.958047
Itpripl2	0.708234	0.116049	1.10302
Myo10	0.707867	0.755889	0.675852
Creb1	0.707261	1.15847	0.406453
Amotl2	0.706674	0.768845	0.665226
Bcar1	0.705551	0.999282	0.50973
Wwtr1	0.705096	0.888071	0.583113
Angpt2	0.704856	0.943415	0.545818
Gm11808	0.704848	0.646383	0.743825
Sash1	0.703884	0.116049	1.09577
Psma3	0.703699	0.950548	0.539134
Tmem184b	0.70309	0.701507	0.704145
Tpp1	0.70239	0.994097	0.507918
Capza1	0.702254	0.782265	0.648913
Rheb	0.702196	0.510204	0.83019
Ssr4	0.70168	0.67628	0.718613
Nktr	0.701595	0.491129	0.841906
Hdac2	0.701415	1.05069	0.468567
Skp1a	0.70085	0.317763	0.956241
Ptp4a2	0.699903	1.09558	0.436115
Myl12b	0.698769	0.548057	0.799244
Eif4g3	0.698639	1.17803	0.379042
Peli1	0.697866	0.748925	0.663827
Smarce1	0.697179	0.83688	0.604046
Dnajc3	0.697081	0.656272	0.724287
Nucb1	0.696888	0.763268	0.652634
Vtn	0.696667	0.341056	0.933742
Slc38a11	0.69585	0.734088	0.670358
Pmepa1	0.695384	1.21427	0.349462
Lurap1l	0.695302	0.609789	0.75231
Sumo3	0.695105	1.22374	0.342682
Wdr82	0.694255	0.73723	0.665604
Diaph2	0.693794	0.803307	0.620785
Adap2	0.693287	0.527676	0.803694
Cs	0.693119	0.705835	0.684642
Psmb6	0.693047	0.35762	0.916665
Gatad2b	0.692742	0.77407	0.638524
Rasa3	0.692609	0.678496	0.702018
Cirbp	0.689975	0.745995	0.652629
Rap1b	0.689575	0.733561	0.660251
Taok2	0.689425	0.739788	0.655849
Ncf2	0.689045	0.261728	0.973923
Tspan15	0.688306	0.48465	0.824077
Psmb1	0.687608	0.644237	0.716522
Glud1	0.687312	0.557169	0.774074
Tia1	0.687144	0.860519	0.57156
Txn2	0.687024	0.742793	0.649844
Wbp2	0.685687	0.879404	0.556542
Larp1	0.685363	0.890445	0.548641
Dusp6	0.685262	0.392781	0.880249
Ddx39b	0.68493	0.591699	0.747084
Serinc1	0.684116	0.540063	0.780151
Pabpn1	0.683366	0.342984	0.910288
Pls3	0.680832	0.788158	0.609281
Slc29a1	0.680369	0.479421	0.814334
Sort1	0.680259	0.892846	0.538535
Rbm5	0.679445	0.438029	0.840388
Slc12a7	0.679293	0.69289	0.670229
Tmod3	0.679286	0.544084	0.76942
Fcgrt	0.679251	1.14565	0.368321
Ralb	0.679239	0.799166	0.599288
Lman1	0.679172	1.13632	0.374403
Myo18a	0.679154	0.856295	0.561059
Aoc3	0.678535	0.207468	0.99258
Ndufa3	0.678451	0.916496	0.519754
Mef2a	0.678321	0.707528	0.65885
Anapc5	0.677469	0.681509	0.674775
Itm2a	0.677424	0.909251	0.522873
Pgk1	0.67728	0.64716	0.69736
Nck2	0.677121	0.419468	0.848889
Polr1d	0.67666	0.520365	0.780856
Cysltr2	0.676658	0.382447	0.872798
Clint1	0.676607	0.87513	0.544259
Arf4	0.676165	0.576706	0.742471
Olfml2a	0.676069	0.116049	1.04942
Tnrc18	0.67572	0.261728	0.951716
Ccdc88a	0.674962	0.35774	0.886444
Ndufs3	0.674659	0.385548	0.8674
Atf7	0.674092	0.476444	0.805856
Snrpb	0.673277	0.703108	0.653391
Ndst1	0.672585	0.692546	0.659278
Dnaja2	0.671592	0.307149	0.914553
Lamp2	0.67153	0.996014	0.455206
Nr2f1	0.67134	0.81996	0.57226
Rmnd5a	0.671272	0.940627	0.491702
Xpr1	0.671061	0.894599	0.522037
Klhdc2	0.670294	1.19004	0.323797
Ap1s1	0.669065	0.62554	0.698081
Capn2	0.668987	0.894752	0.518477
Brd8	0.668849	0.307149	0.909982
Adam9	0.66861	0.302931	0.912396
Etnk1	0.6682	0.616723	0.702519
Tmed7	0.667669	0.576465	0.728472
Cyb5r1	0.667272	0.646709	0.68098
Tfpi	0.665487	0.553752	0.739976
Taldo1	0.665141	0.808939	0.569276
Hdlbp	0.665124	0.432008	0.820535
Tead2	0.664476	1.01035	0.433895
Mkln1	0.664327	0.423391	0.824951
Vamp3	0.66421	0.816613	0.562608
Igf2	0.663917	1.06466	0.396754
Rhbdf1	0.663648	0.335224	0.882598
BC005537	0.66339	0.88228	0.517464
Rian	0.663385	0.970965	0.458332
Csnk1e	0.663291	0.464589	0.795758
Apoe	0.662485	0.480056	0.784105
4833422C13Rik	0.662425	0.466178	0.793256
Tcf25	0.662113	0.66227	0.662009
2900097C17Rik	0.662095	1.13493	0.346871
Oasl2	0.662061	0.397669	0.838323
Prdx3	0.661451	0.485496	0.778755
Psma4	0.660757	0.366242	0.857101
Rbp1	0.660273	0.525372	0.750207
Sar1a	0.659909	0.70583	0.629295
Chd3	0.659846	0.28942	0.906797
Ptprs	0.658891	0.64716	0.666713
Ube2h	0.65874	0.53944	0.738273
Pde8b	0.658312	0.699058	0.631149
Ccdc50	0.65767	0.757916	0.590839
Tprgl	0.657507	0.61402	0.686499
Dmwd	0.657074	0.464595	0.785393
Rbm25	0.656374	0.748021	0.595277
Mt1	0.656054	0.726322	0.609209
Acat1	0.655517	0.707761	0.620688
Cpsf6	0.655131	0.410389	0.818293
Cox7a2l	0.655068	0.641084	0.664391
Rab11a	0.654714	0.820463	0.544214
Cacna1c	0.65441	0.820477	0.543698
Foxp1	0.653422	0.730156	0.602266
Map2k1	0.652818	0.57949	0.701703
Sfxn1	0.652427	0.544305	0.724509
Itpr2	0.652402	0.295441	0.890377
Ctdsp1	0.652079	0.744051	0.590764
Ubn2	0.651907	0.996045	0.422481
Cnot6l	0.651471	0.960088	0.445726
Abca1	0.651232	0.785724	0.561571
C1s1	0.651018	0.731211	0.597555
Ltbr	0.650427	0.243806	0.921508
Rbx1	0.649139	0.511586	0.740841
Igf1r	0.648985	0.576648	0.697209
Mrvi1	0.64872	0.607178	0.676416
Sin3b	0.648583	0.467317	0.769427
Nrp1	0.648512	0	1.08085
Pik3cd	0.647846	0.607583	0.674687
Rpl9	0.647819	0.439569	0.786653
Fam162b	0.647543	0.351268	0.845059
Nfkbia	0.647537	0.207468	0.940917
Srrt	0.647336	0.243806	0.916356
Ndufab1	0.646805	0.626507	0.660338
Ano1	0.645544	0.307751	0.87074
Trappc4	0.645014	0.295441	0.878063
Dynlt3	0.64468	0.142588	0.979408
Ganab	0.644583	0.575153	0.69087
Zcchc24	0.644512	0.689979	0.614201
Calu	0.644115	0.551844	0.705629
Nucks1	0.644102	0.894823	0.476956
Ndufs7	0.642689	0.335224	0.847665
Gnai3	0.642417	0.714513	0.594354
Ppp6r3	0.642319	0.770557	0.556827
Dusp22	0.642198	0.698435	0.604706
Anp32b	0.642082	0.794104	0.540733
Extl3	0.64197	0.249964	0.903308
Mtdh	0.641339	0.127757	0.983727
Tax1bp1	0.640864	0.207468	0.929794
Pelo	0.640432	0.575153	0.683952
March7	0.639728	0.974017	0.416869
Slfn5	0.637791	0.677889	0.611059
Ube2b	0.637324	0.63863	0.636454
4930402H24Rik	0.637114	0.723698	0.579391
Srsf6	0.635944	0.75893	0.553953
Efemp2	0.635796	0.245394	0.896064
Bcl9l	0.635705	0.778006	0.540837
Tspan4	0.634981	0.630725	0.637818
Pxdn	0.634464	0.482033	0.736085
Sdcbp	0.634408	0.667196	0.612549
Selenok	0.634166	0.373151	0.808176
Vamp2	0.633679	0.305654	0.852363
Lipo3	0.633629	1.06694	0.344753
Dvl3	0.63348	0.978849	0.403235
Ndufa6	0.633409	0.692697	0.593884
Arhgef25	0.633127	0.776866	0.537301
Uqcrfs1	0.633113	0.790037	0.528497
Eif5	0.632973	0.802293	0.520093
Eif4a3	0.632811	0.511586	0.713627
Atp6v1a	0.632623	0.720772	0.573858
Rbbp4	0.632476	0.695712	0.590318
Clta	0.632297	0.368997	0.80783
Elk3	0.631917	0.142588	0.958137
Notch1	0.631398	0.493769	0.723151
Eif1ax	0.631351	0.498496	0.719922
Csnk1g3	0.631297	0.686514	0.594485
Setd2	0.6308	0.728151	0.565899
Eif4a2	0.630757	0.887957	0.45929
Ptprd	0.630304	0.720831	0.569952
Adipor1	0.630212	0.763497	0.541355
Frmd4a	0.629771	0.839745	0.489789
Anapc2	0.629573	0.397256	0.784451
Tril	0.629447	1.01036	0.375505
Mbd2	0.629407	0.75337	0.546765
Prkg1	0.629136	0.64437	0.61898
Bag1	0.628925	0.735396	0.557944
Add3	0.628177	0.485572	0.723248
Wdfy3	0.628169	0.179393	0.927354
Ppp2r5c	0.628166	0.673355	0.59804
Acin1	0.628127	0.510351	0.706644
Ppp1cc	0.627132	0.572827	0.663335
Ndufb8	0.627037	0.304251	0.842227
Rcsd1	0.626938	0.664572	0.601849
Esd	0.62683	0.819345	0.498487
Ccdc80	0.62548	0.445014	0.74579
Thoc2	0.62525	0.865134	0.465327
Atp6ap1	0.62506	0.892266	0.446923
Nop53	0.62498	0.789298	0.515435
Rpl36al	0.62486	0.270345	0.861204
Atp6v1f	0.624814	0.424014	0.758681
Pros1	0.624736	0.498496	0.708896
Rnf13	0.624717	0.738311	0.548988
Hadh	0.624582	0.520365	0.69406
Actr10	0.624546	0.67628	0.590057
Mettl9	0.624367	0.714929	0.563992
Pde3a	0.624137	0.364779	0.797042
Morf4l2	0.624073	0.537012	0.682114
Ago2	0.623821	0.405037	0.769677
Slc3a2	0.622029	0.385548	0.779684
Ubap2l	0.621868	0.610555	0.629411
Ociad1	0.621345	0.877128	0.450822
Adamts10	0.621281	0.306858	0.830896
Ndufa12	0.620488	0.715359	0.557241
Lix1l	0.620088	0.805214	0.496672
Nipbl	0.619513	0.663316	0.590311
Fnbp1	0.619056	0.886135	0.441004
Ano6	0.61833	0.482512	0.708876
Swi5	0.617991	0.243806	0.867448
Kdelr1	0.617508	0.43733	0.737627
Slc25a39	0.617394	0.250193	0.862194
Scarf2	0.617345	0.479426	0.709291
Hook3	0.617243	0.385548	0.771707
Ptk7	0.616438	0.735681	0.536942
Wsb2	0.616414	0.759083	0.521301
Swt1	0.616402	0.670521	0.580322
Cyc1	0.616324	0.179393	0.907611
Ttyh3	0.616096	0.957022	0.388812
Atp1a1	0.615283	0.79886	0.492898
Car2	0.615249	0.604636	0.622324
Wtap	0.614942	0.951008	0.390899
Tmem106b	0.614847	0.665255	0.581242
Atxn10	0.61417	0.142588	0.928558
Sdhd	0.614145	0.670668	0.576462
Psmb5	0.613615	0.38686	0.764784
Abi2	0.613438	0.493856	0.693159
H2afy	0.612755	0.386394	0.763663
1110018N20Rik	0.611929	0.859772	0.4467
Ybx3	0.611831	0.612407	0.611446
Lgi1	0.611293	0.865644	0.441725
Rgs4	0.610936	0.729045	0.532198
Sf3b5	0.610758	0.464589	0.708204
Romo1	0.61034	0.189605	0.89083
Epn1	0.610211	0.754657	0.513914
Pum2	0.610079	0.627634	0.598375
Plxdc2	0.609759	0.215151	0.87283
Ncor2	0.609731	0.400176	0.749434
Sesn3	0.609608	0.51623	0.67186
Fndc3a	0.609192	0.667892	0.570058
Ginm1	0.609068	0.464595	0.705383
Zfand3	0.608744	0.348541	0.782212
Camk1	0.60865	1.04746	0.316112
Ndufv2	0.608584	0.539844	0.654411
Sec61b	0.607842	0.573969	0.630423
Mapk1	0.607309	0.609905	0.605578
Ptpn1	0.607163	0.411856	0.737368
Prkar1b	0.606861	0.405969	0.740789
Mbtps1	0.606644	0.942765	0.382563
Bicc1	0.606566	0.794498	0.481278
Pam	0.606537	1.00751	0.339224
Tsc22d4	0.60637	0.63264	0.588856
Nid2	0.606261	0.639752	0.583934
Cfl2	0.605725	0.142588	0.914482
Slc49a4	0.605195	0.179393	0.889063
Psmc5	0.605114	0.670493	0.561527
Mirg	0.6048	0.412087	0.733275
Inafm2	0.604483	0.709969	0.534159
Tmem167	0.604429	0.758883	0.50146
Fam162a	0.603875	0.591699	0.611993
Smurf2	0.603736	0.438029	0.714207
Ppp1r2	0.603662	0.785729	0.482284
Cenpb	0.603619	0.687899	0.547431
Wsb1	0.602927	0.766374	0.493962
Zbtb7a	0.602368	0.576648	0.619515
St3gal5	0.601749	0.520365	0.656005
Eif4g1	0.601727	0.70084	0.535653
Khdrbs1	0.601689	0.431162	0.715373
Kif1c	0.601567	0.766386	0.491687
Mtch2	0.601427	0.438029	0.710358
Nkd2	0.601395	0.57104	0.621631
Susd2	0.601203	0.386394	0.74441
Dbn1	0.601201	0.220784	0.854812
Ppp4r3a	0.600931	0.891452	0.40725
Adprh	0.600915	0.656438	0.5639
Tbl1x	0.600908	0.754638	0.498422
Ndufv3	0.600819	0.286497	0.810366
Kctd11	0.600738	0.779703	0.481428
Foxn3	0.600535	0.699054	0.534855
Pmp22	0.600234	0.614391	0.590796
Tyk2	0.599405	0.619324	0.586126
Cggbp1	0.599196	0.689743	0.538831
Itch	0.598778	0.892429	0.403011
Tmem258	0.598474	0.317763	0.785614
Rnf7	0.598189	0.351268	0.762802
Hbp1	0.597201	0.397256	0.730498
Pebp1	0.596724	0.655783	0.557351
Ptges3	0.596461	0.508507	0.655098
Psma2	0.596026	0.683964	0.5374
Msrb3	0.595547	0.652141	0.557818
Top2b	0.594602	0.826899	0.439738
Lpgat1	0.594144	0.80842	0.451294
Rab1a	0.594025	0.404756	0.720204
Tbca	0.593799	0.476875	0.671749
Leprotl1	0.59366	0.689975	0.529451
Tmem234	0.593632	0.758459	0.483747
Eml4	0.593357	0.910527	0.38191
Luc7l2	0.59309	0.336833	0.763927
Actr1b	0.592956	0.342908	0.759655
Commd3	0.592791	0.468813	0.675443
Emcn	0.592457	0.882435	0.399139
Reep5	0.592097	0.405469	0.716516
Znrf1	0.591387	0.670983	0.538323
Dbndd2	0.590893	0.526236	0.633997
Taf1d	0.590417	0.127757	0.898857
Mllt6	0.590394	0.551844	0.616094
Arhgap29	0.589969	0.754545	0.480252
Nfyc	0.589946	0.394544	0.720213
Ndufa11	0.589873	0.8059	0.445854
Tsen34	0.589553	0.321981	0.767934
Caskin2	0.589549	0.566602	0.604847
Ptar1	0.589051	0.557985	0.609762
Cmtm6	0.588934	0.547211	0.616749
Ccrl2	0.588612	0.473668	0.665241
Sipa1	0.588517	0.500208	0.647389
Rpn2	0.588378	0.797432	0.449009
Dennd5b	0.588351	0.507367	0.64234
Furin	0.587289	0.82542	0.428536
Kat6a	0.587152	0.295441	0.781625
Flt1	0.587056	0.445014	0.681751
Cdk4	0.586975	0.270345	0.798062
Ndufs5	0.586661	0.28942	0.784822
Mink1	0.586608	0.58443	0.58806
Ick	0.586524	0.436902	0.686271
Uqcr10	0.586058	0.368997	0.730765
Arpc3	0.585492	0.564659	0.599381
Lama1	0.585421	0.692885	0.513778
Sec61a1	0.585284	0.483644	0.653043
Arid5b	0.585156	0.837965	0.416616
Map2k2	0.585108	0.377776	0.723329
Btbd3	0.584098	0.377772	0.721648
Smim14	0.583862	0.779898	0.453172
Ptpn9	0.583502	0.425367	0.688925
Ctbp1	0.582897	0.596662	0.573721
Dab2ip	0.582893	0.634878	0.548235
Plcl1	0.582809	0.500208	0.637876
Kdm2a	0.582807	0.871879	0.390092
Bmpr1a	0.582754	0.762021	0.463242
Rapgef5	0.581779	0.142588	0.874574
Hdgf	0.580886	0.305654	0.764375
Khsrp	0.580829	0.56184	0.593488
Idh3g	0.580656	0.423387	0.685502
H1f0	0.580596	0.497155	0.636223
Itpr1	0.580044	1.09151	0.239063
Cnot6	0.57976	0.672116	0.518189
Smim10l1	0.579549	0.473668	0.650136
Abcg1	0.579399	0.754764	0.462489
Phactr2	0.579348	0.363372	0.723332
Slc6a6	0.579297	0.68494	0.508868
Trak1	0.578372	0.496888	0.632694
Aamp	0.578272	0.504571	0.627406
Slco3a1	0.577961	1.02258	0.281549
Trim35	0.577693	0.726603	0.478419
Cd302	0.577659	0.523715	0.613621
Setbp1	0.577632	0.295441	0.765759
Psmc1	0.577091	0.411856	0.687248
Ubl5	0.576857	0.335224	0.737946
Cd200	0.576568	0.48518	0.637494
9930111J21Rik2	0.576483	0.658487	0.521814
Ing4	0.576241	0.862734	0.385246
Fam120a	0.576151	0.332193	0.738789
Ssbp3	0.576092	0.682028	0.505468
Ehmt1	0.576048	0.84626	0.395907
Polr2a	0.575508	0.127757	0.874009
Nt5dc2	0.575012	0.743085	0.462963
Kctd3	0.574713	0.491129	0.630435
Gsk3b	0.573796	0.992976	0.294342
Evi5	0.573032	0.892393	0.360124
Crtap	0.572886	0.822476	0.406492
Pfdn1	0.572856	0.321981	0.740106
Fto	0.572808	0.321981	0.740026
Fam98b	0.572558	0.715018	0.477584
Nsd3	0.572198	0.35774	0.715171
Cast	0.571758	0.965211	0.309456
Nap1l4	0.571436	0.277712	0.767252
Hnrnpl	0.571327	0.332193	0.73075
Tnrc6c	0.571177	0.686128	0.494543
Pdia3	0.570707	0.667892	0.505918
Ppp6r1	0.570603	0.405469	0.680692
Lama2	0.570524	0.806171	0.413426
Spin1	0.570175	0.261728	0.775806
Hacd4	0.570045	0.525035	0.600051
Ctdspl	0.569898	0.576648	0.565398
Ppp1r14b	0.569897	0.438029	0.657808
Sp1	0.569817	0.938008	0.324356
Zwint	0.569817	0.686334	0.492138
Hmgcs2	0.569502	0.75337	0.446923
Ccnd1	0.569226	0.405469	0.678398
Med13	0.568662	0.727018	0.463092
Stt3b	0.568635	0	0.947724
Pon2	0.568574	0.567381	0.56937
Fabp5	0.56828	1.00288	0.278548
Ube2z	0.568164	0.85436	0.377367
Gna12	0.568022	0.664572	0.503656
Rhog	0.567379	0.161663	0.837856
Ttn	0.566574	0.963425	0.302006
Cux1	0.566234	0.465344	0.633493
Serp1	0.56623	0.597591	0.545323
Degs1	0.56618	0.229863	0.790392
Glo1	0.566063	0.448242	0.644611
Gnptg	0.565829	0.771932	0.428427
Fam53b	0.564327	0.816843	0.395983
Imp3	0.564291	0.494523	0.610803
Appl1	0.563927	0.554444	0.570249
Sike1	0.563242	0.189605	0.812334
Apobec1	0.562719	0.618238	0.525707
Git2	0.562228	0.527052	0.585679
Pnpla8	0.562101	0.812281	0.395315
Mospd3	0.561815	0.8175	0.391358
Ndufb4	0.561468	0.405969	0.665134
Cavin3	0.561217	0.613437	0.526404
Brk1	0.561178	0.497155	0.60386
Kmt2a	0.560807	0.607178	0.529893
Scaf11	0.560409	0.557169	0.562568
Cfdp1	0.559411	0.761676	0.424568
Pisd	0.559256	0.409255	0.659256
Lrrc4c	0.55925	0.661037	0.491392
Map1lc3a	0.559206	0.422907	0.650072
Atrx	0.559104	0.788476	0.406189
Zyg11b	0.55897	0.688963	0.472308
Ccar1	0.558924	0.721077	0.450822
Tsc22d1	0.558829	0.467317	0.619837
Ndufb5	0.558627	0.342908	0.70244
Ogt	0.558559	0.692225	0.469449
Mia3	0.558224	0.525035	0.58035
Rftn1	0.558012	0.493856	0.600783
BC028528	0.557667	0.382642	0.67435
Paics	0.557634	0.404756	0.659552
Ergic2	0.557283	0.627969	0.51016
Stat6	0.556903	0.763944	0.418876
Glrx5	0.556406	0.698855	0.461439
Sec61g	0.556207	0.88846	0.334704
Apmap	0.55542	0.448242	0.626872
Slc7a1	0.555196	0.307149	0.72056
Adam10	0.554732	0.485862	0.600645
Cdk14	0.554313	0.777958	0.405216
Dnajb6	0.55423	0.302931	0.721762
Tmem165	0.553915	0.489432	0.596905
Nip7	0.553717	0.525035	0.572839
Gab1	0.553652	0.80317	0.387307
Ndufa5	0.553645	0.52036	0.575834
Adrm1	0.553637	0.542765	0.560885
Map7d1	0.553533	0.304251	0.719721
Atp6v1g1	0.55328	0.230795	0.76827
Pld1	0.553149	0.652792	0.48672
Pdcd5	0.553049	0.83372	0.365935
Litaf	0.552088	0.634619	0.497068
Anapc1	0.551833	0.781419	0.398775
Cdv3	0.551698	0.820463	0.372521
Gm4707	0.551647	0.161663	0.811636
Nufip2	0.550868	0.924564	0.301738
Setd5	0.550755	0.79016	0.391152
Sptssa	0.550339	0.610768	0.510053
Tnnt2	0.550304	0.65014	0.483747
Hacd2	0.549359	0.175175	0.798815
Arhgap24	0.548965	0.436898	0.623677
Nr3c1	0.548596	0.405037	0.644303
Gm20721	0.548159	0.491129	0.586179
Krit1	0.548087	0.573709	0.531006
Mob1a	0.547635	0.70021	0.445919
Lactb2	0.547562	0.341056	0.685233
Dpy19l1	0.547457	0.872925	0.330479
Naa20	0.547271	0.435935	0.621495
Celf1	0.547256	0.432008	0.624089
Rab18	0.546912	0.404316	0.641977
Tgoln1	0.546436	0.864771	0.334213
Xbp1	0.546407	0.817825	0.365461
Ikzf5	0.546021	0.823567	0.36099
Lamtor2	0.545884	0.35762	0.671394
Rap1a	0.545579	0.605804	0.505429
Bcar3	0.545208	0.490283	0.581825
Ppp1r18	0.545158	0.689597	0.448866
Taf10	0.544926	0.672116	0.460133
Tgfbr2	0.54484	0.229863	0.754824
Bri3	0.544389	0.270345	0.727085
Pip5k1b	0.544176	0	0.90696
Tspan17	0.543965	0.389788	0.64675
Cdc123	0.543407	0.404316	0.636134
Scp2	0.543321	0.400176	0.638751
Taok3	0.542273	0.753003	0.401786
Parva	0.542195	0.476879	0.585739
Ankrd10	0.542024	0.63511	0.479966
Mest	0.541849	0.940604	0.276013
Prr5l	0.54178	0.726464	0.418658
Csnk2b	0.541738	0.557622	0.531148
Oxr1	0.541604	0.630725	0.48219
Cotl1	0.541475	0.317763	0.690616
Far1	0.540781	0.610555	0.494266
Smap1	0.540671	0.491129	0.5737
Vezf1	0.539647	0.619324	0.48653
Oxct1	0.539519	0.769009	0.386526
Ndufc1	0.538877	0.37795	0.646161
Abl1	0.53881	0.829894	0.344753
Krcc1	0.538625	0.508507	0.558703
Galnt1	0.53754	0.85323	0.32708
Ddost	0.537196	0.601692	0.494199
Yap1	0.537001	0.491129	0.567583
Psmd11	0.536663	0.277712	0.709297
Morrbid	0.536507	0.127757	0.809007
Npepps	0.536322	0.321981	0.679216
Btd	0.536261	0.693736	0.431278
Tmem131	0.536102	0.516225	0.549352
Arl1	0.535741	0.258637	0.720477
Yeats2	0.535513	0.750401	0.392254
Tsc22d2	0.535053	0.672616	0.443344
Dcakd	0.534961	0.532794	0.536405
Zfp46	0.534535	0.624066	0.474848
Atox1	0.534444	0.179393	0.771145
Gm20594	0.534024	0.432008	0.602034
Rpl35	0.533589	0.386394	0.63172
Anpep	0.533287	0.38686	0.630904
St5	0.53323	0.382447	0.633752
Ube2k	0.532584	0.142588	0.792581
Hcfc1r1	0.532338	0.565756	0.510059
Adamts8	0.532159	0.404316	0.617388
Arf5	0.532112	0.689799	0.426988
Surf4	0.53205	0.220784	0.739561
Chmp5	0.532022	0.876682	0.302248
Lrp10	0.531717	0.432008	0.59819
Hspd1	0.531657	0	0.886096
Stx7	0.531637	0.630039	0.466035
Ogdh	0.531434	0.336838	0.661166
Snu13	0.531218	0.729768	0.398851
Fyttd1	0.531142	0.490283	0.558381
Sppl3	0.530545	0.552895	0.515645
Blmh	0.530493	0.366242	0.639994
Bclaf1	0.530193	0.591699	0.489189
Klc1	0.530022	0.56494	0.506743
Arhgap5	0.529963	0.557113	0.511863
Cxcr4	0.52928	0.59856	0.483092
Pex19	0.529253	0.277712	0.696946
Tspan7	0.528872	0.295441	0.684492
Eif3h	0.528011	0.411627	0.605599
4833439L19Rik	0.527792	0.784104	0.356918
Snrpe	0.527567	0.782088	0.357887
Erp29	0.526501	0.230795	0.723639
Mtap	0.526052	0.336838	0.652194
Klhl24	0.526035	0.161663	0.76895
Rhot1	0.525405	0.57949	0.489348
Hipk3	0.525032	0.806328	0.337502
Pfkp	0.525016	0.336833	0.650471
Basp1	0.524859	0.419468	0.59512
Pitpnb	0.52485	0.609905	0.468146
Myo6	0.524299	0.386394	0.616236
Pnn	0.523943	0.438029	0.581218
Srp72	0.523839	0.717671	0.394617
Ythdf2	0.522814	0.737014	0.380015
Magt1	0.522553	0.627634	0.452498
Psma6	0.522547	0.547625	0.505828
Rpl7l1	0.522495	0.485496	0.54716
1110004F10Rik	0.522165	0.161663	0.762499
Stim1	0.522129	0.547211	0.505408
Pald1	0.521827	0.65725	0.431546
Pgrmc1	0.521813	0.673584	0.420633
R3hdm2	0.521797	0.687899	0.411062
Sh3bp4	0.521754	0.470977	0.555606
Tpm2	0.521133	0.519463	0.522246
Ppp3ca	0.521082	0.700611	0.401397
Glul	0.520917	0.336838	0.643636
Cct6a	0.520846	0.332193	0.646615
Tmem176a	0.520426	0.28942	0.67443
Gabarapl2	0.520265	0.681355	0.412871
Ro60	0.520177	0.189605	0.740558
Mfsd14a	0.519715	0.727617	0.381113
Ddx1	0.519373	0.614972	0.455639
Ube2v1	0.519338	0.567956	0.486926
Cpped1	0.518851	0.220784	0.717563
Nap1l1	0.518801	0.726317	0.380457
Zc2hc1a	0.518757	0.844314	0.301719
Mrpl12	0.518322	0.612996	0.455205
Trmt112	0.517773	0.532073	0.50824
Nsfl1c	0.517611	0.366013	0.618677
Arl8a	0.517575	0.879348	0.276393
Sox13	0.517557	0.336833	0.638039
Epn2	0.517541	0.230795	0.708706
Fis1	0.517455	0.411856	0.587854
Cacnb3	0.517201	0.336838	0.637444
Nab1	0.517041	0.829098	0.309002
Sumo1	0.516841	0.386394	0.603806
Ndufa7	0.516627	0.321981	0.646391
Rictor	0.516525	0.405469	0.590563
Dnm2	0.516048	0.796465	0.329103
Man1c1	0.515667	0.840562	0.299071
Rrp1	0.515658	0.473668	0.543652
Etfb	0.51564	0.627634	0.440977
Taok1	0.515635	0.857497	0.287728
Uqcr11	0.515539	0.485496	0.535567
Stk38	0.515335	0.847902	0.293624
Csrp1	0.515137	0.482708	0.536757
Tbx3	0.514706	0.59102	0.463829
Galnt10	0.514541	0.830161	0.304128
Ccdc3	0.514232	0.261728	0.682568
Ncoa2	0.513605	0.70021	0.389202
Hdac1	0.513479	0.277712	0.670657
Comt	0.513219	0.277712	0.670223
Zzef1	0.512331	0.699757	0.38738
Zfand5	0.512255	0.142588	0.7587
Mrpl52	0.512032	0.321981	0.638733
R3hdm4	0.511769	0.270345	0.672719
Sec13	0.511578	0.567381	0.474376
Ppp2r2a	0.511562	0.485046	0.529239
Mark3	0.511528	0.813571	0.310166
Psma7	0.51122	0.382642	0.596939
Fbxw11	0.510934	0.562035	0.476867
B3gnt2	0.510853	0.537012	0.493414
Sdhaf2	0.51043	0.733377	0.361799
Tshz1	0.510407	0.220784	0.70349
Rbm42	0.510389	0.56546	0.473675
Ssr2	0.510263	0.397072	0.585724
Araf	0.510139	0.179393	0.730636
Cdh2	0.509678	0.377721	0.597649
Ankrd40	0.509424	0.243806	0.686502
Ccdc124	0.509112	0.610555	0.441484
Tbc1d16	0.508743	0.405469	0.577593
Cyth3	0.508732	0.719236	0.368396
Lrpprc	0.508555	0.557985	0.475601
Lrrc8c	0.508449	0.618777	0.434897
Sbf1	0.508363	0.71464	0.370845
Dgkz	0.508304	0.116049	0.769807
Tmed9	0.507958	0.585244	0.456434
Zbtb43	0.507556	0.438029	0.553906
Slirp	0.507535	0.775095	0.329162
Cuta	0.507111	0.774035	0.329162
Tnrc6b	0.506596	0.553124	0.475578
Tmem189	0.505987	0.520365	0.496402
Aff4	0.505981	0.473668	0.527523
Eef1d	0.505929	0.277712	0.658073
Zfp706	0.505751	0.302931	0.640964
Irak1	0.505367	0.601911	0.441004
Ndufa1	0.505133	0.624912	0.425281
Lonp1	0.50473	0.35416	0.60511
Rtl8b	0.504591	0.716557	0.363279
Klhl9	0.504529	0.654341	0.404654
Chmp3	0.50451	0.482324	0.519301
Nacc1	0.504443	0.269499	0.661073
Srp14	0.504422	0.609905	0.4341
Ythdf3	0.504362	0.230795	0.68674
Vps35	0.50418	0.557169	0.468855
Cdk11b	0.504179	0.479421	0.520684
Larp4b	0.504164	0.410389	0.56668
Cabin1	0.504022	0.785431	0.316415
Sqstm1	0.503883	0.5443	0.476938
Cox14	0.503739	0.175175	0.722782
Csnk1g2	0.503523	0.363372	0.596957
Hint1	0.502944	0.646709	0.407101
Prkab2	0.502562	0.348541	0.605244
Rasgrp3	0.502548	0.116049	0.760213
Cdc26	0.502214	0.569181	0.45757
Htr1b	0.502167	0.392458	0.575307
Serping1	0.502113	0.404316	0.567311
Cers2	0.502062	0.373383	0.587849
Bex3	0.501816	0.5443	0.473494
Atp2c1	0.50139	0.127757	0.750478
Usp47	0.501338	0.270345	0.655333
Zic4	0.501309	0.230795	0.681652
Tmx3	0.501141	0.591699	0.440769
Nhsl2	0.500785	0.270345	0.654411
Spag9	0.500364	0.366242	0.58978
Pink1	0.50035	0.249964	0.667274
Nutf2-ps1	0.500031	0.464595	0.523655
Rab6a	0.499783	0.69775	0.367805
Smad4	0.499534	0.179393	0.712962
Ywhag	0.499429	0.449737	0.532557
Plekhg3	0.499361	0.575351	0.448701
Kmt2d	0.499163	0.794534	0.302248
Cul3	0.498993	0.615411	0.421382
Tram2	0.498922	0.745762	0.334362
Runx1t1	0.498613	0.673249	0.382189
Ndufs1	0.497515	0.579486	0.442867
Rpl36a-ps1	0.496992	0.464589	0.518593
Irf2bpl	0.496927	0.669903	0.381609
Tra2a	0.496489	0.258637	0.655057
Txnl1	0.496355	0.348541	0.594897
Snai1	0.496258	0.410389	0.553504
Arhgef6	0.49611	0.535463	0.469875
Mrps21	0.495768	0.457105	0.521544
Selenos	0.495266	0.127757	0.740272
Ppdpf	0.495141	0.699871	0.358654
Nagk	0.495101	0.59856	0.426128
Ddx6	0.494741	0.976368	0.173657
Pdlim5	0.494632	0.701873	0.356471
Cemip2	0.494317	0.528136	0.471771
Abhd2	0.494213	0.404316	0.554145
Cers5	0.494058	0.179393	0.703836
Mecp2	0.493655	0.848525	0.257075
Kirrel	0.493598	0.585563	0.432289
Ptov1	0.493533	0.377721	0.570742
Atp6v0e	0.493466	0	0.822444
Trpc3	0.49332	0.591372	0.427951
Eif3k	0.49321	0.351268	0.587837
Ddb1	0.493138	0.127757	0.736726
Emp2	0.492975	0.409255	0.548788
Tbx18	0.492609	0.598734	0.421859
Syne2	0.492192	0.500208	0.486848
Shc1	0.491513	0.448242	0.520361
Osbpl5	0.491491	0.801571	0.284771
Ip6k1	0.490867	0.341056	0.590741
Myh10	0.490662	0.441116	0.523692
Syncrip	0.4905	0.539613	0.457758
Eci2	0.490452	0.295441	0.620458
Bicd2	0.490311	0.116049	0.739819
Sppl2a	0.490263	0.28942	0.624158
Dlst	0.49024	0.698855	0.351163
Hbb-bh1	0.489964	0.431162	0.529165
Tnfrsf1a	0.48952	0.411856	0.541296
Foxc2	0.489387	0.438029	0.523626
Tspan14	0.489363	0.920541	0.20191
Rapgef4	0.488761	0.404316	0.545059
Snrpb2	0.488588	0.630725	0.393829
Fbn2	0.488518	0.142588	0.719137
Ndufs6	0.488459	0.464595	0.504369
Cdk2ap1	0.488349	0.243806	0.651379
Rtraf	0.488328	0.696972	0.349232
Ypel3	0.488318	0.317763	0.602021
Gtf2ird1	0.487781	0.597599	0.414569
Speg	0.487597	0.250193	0.645866
Ostf1	0.487444	0.667892	0.367145
Zfp24	0.487266	0.863419	0.236498
Wapl	0.486934	0.116049	0.734191
Stxbp1	0.486776	0.116049	0.733928
Tubb4b	0.486725	0.258637	0.638784
Slc44a1	0.486614	0.630971	0.390376
Gprc5c	0.486323	0.270345	0.630309
Psmc2	0.486263	0.576465	0.426128
Emp3	0.485986	0.605932	0.406022
Ktn1	0.48579	0.513121	0.467569
Ctsd	0.48574	0.175175	0.692783
Thoc7	0.485736	0.482324	0.488011
R3hdm1	0.485663	0.670979	0.362119
Cltb	0.485518	0.639677	0.382745
Gm10717	0.485014	0.468179	0.496237
Hnrnpul2	0.484778	0.243806	0.645427
Smarca4	0.484352	0.161663	0.699478
Dock10	0.484202	0.850627	0.239919
Nfatc4	0.483992	0.345912	0.576046
Ddx3y	0.483985	0.507367	0.468397
Trpm7	0.483544	0.464595	0.496176
Gls	0.483536	0.656359	0.368321
Cp	0.483403	0.250193	0.638876
Rab12	0.483248	0.765781	0.294892
Rbm8a	0.483229	0.844114	0.24264
Vdac3	0.483097	0.243806	0.642625
Copb2	0.482952	0.530661	0.451146
Gtpbp2	0.482916	0.540063	0.444818
Trp53i11	0.482914	0.607178	0.400071
Prpf8	0.482909	0.449737	0.505023
Adnp	0.482721	0.44112	0.510455
Snrnp200	0.482299	0.643987	0.374507
Il13ra1	0.482217	0.551148	0.436263
Pccb	0.482124	0.424014	0.520864
Gps2	0.48204	0.934121	0.180653
Ptprf	0.481911	0.207468	0.664874
Kdm6b	0.481887	0.336838	0.578586
Snw1	0.481868	0.127757	0.717942
Tmem14c	0.481489	0.243806	0.639944
Mtss1	0.481363	0.781084	0.281549
Ppp4c	0.481189	0.423391	0.519721
Med10	0.4811	0.295441	0.604873
Gsk3a	0.481033	0.90661	0.197314
Manf	0.480889	0.295441	0.604521
Mapkapk2	0.480544	0.295441	0.603946
Apold1	0.480519	0.302931	0.598911
Oat	0.480396	0.404316	0.531115
Ext2	0.480356	0.730938	0.313301
Cul1	0.480262	0.604723	0.397287
Klf9	0.479488	0.810285	0.258957
Rangap1	0.479033	0.229863	0.645146
Yy1	0.478978	0.90502	0.19495
Dusp3	0.478955	0.302931	0.596305
Plin3	0.478724	0.419468	0.518228
Sec11c	0.478645	0.528136	0.445651
Wipf1	0.478637	0.28942	0.604782
Tmem94	0.478327	0.531227	0.44306
Pkn2	0.477641	0.714558	0.319695
2610507B11Rik	0.477473	0.323082	0.580399
Rnaset2a	0.477123	0.565979	0.417885
Rest	0.476923	0.643803	0.36567
Clstn1	0.476809	0.466178	0.483897
Csnk2a2	0.476223	0.368997	0.547707
Emc3	0.475902	0.382447	0.538206
Cd164	0.475582	0.377776	0.540786
Jmy	0.475239	0.457105	0.487329
Rnps1	0.475058	0.673355	0.34286
Hsd17b11	0.474977	0.270345	0.611398
Dda1	0.474816	0.511586	0.450303
Ddr2	0.474652	0.658813	0.351877
Fbxl20	0.474114	0.243806	0.627653
Dnaja1	0.473861	0.405969	0.519122
Cflar	0.473735	0	0.789559
Ttc28	0.473714	0.535517	0.432513
Pdlim7	0.473478	0.653061	0.353755
Mical1	0.47332	0.576648	0.404434
Fam160b1	0.473125	0.576648	0.40411
Rnpepl1	0.473095	0.670493	0.341496
Rassf3	0.472447	0.527676	0.435627
Zfp266	0.472143	0.451578	0.485852
B4galt1	0.47208	0.56642	0.409187
Sf3b4	0.472065	0.624066	0.37073
Chst2	0.471708	0.528136	0.43409
Tial1	0.471629	0.485862	0.462141
Ssh1	0.471371	0.377776	0.533767
Cdc42ep1	0.471302	0.354567	0.549125
Ap3m1	0.471289	0.377776	0.533631
Ccn1	0.471262	0.568892	0.406176
Parp1	0.471153	0.372451	0.536954
Prpf4b	0.471127	0.718832	0.30599
Ubr4	0.470977	0.479421	0.465348
Ostc	0.470829	0.116049	0.707349
Pdia6	0.470796	0.395958	0.520688
Ndufa10	0.470693	0.585563	0.394113
Thbd	0.470644	0.431162	0.496965
Cpsf7	0.470436	0.411627	0.509641
Anapc16	0.470416	0.4203	0.503826
Bbx	0.470121	0.673162	0.334761
Herc2	0.469691	0.73054	0.295792
Golph3	0.469658	0.321981	0.568109
Sgip1	0.469392	0.652939	0.347027
Ndst3	0.469065	0.175175	0.664992
Emsy	0.468874	0.56184	0.406897
Mmp11	0.468757	0	0.781262
Tceal8	0.468406	0.142588	0.685617
Rab31	0.468079	0.295441	0.583172
Klf3	0.46784	0.51623	0.43558
Dennd2a	0.467682	0.277712	0.594328
Rad23b	0.467429	0.599693	0.379253
BC031181	0.466909	0.405469	0.507869
Vps28	0.466771	0.448891	0.478691
Bcr	0.466629	0.66673	0.333228
Sirt2	0.466601	0.438262	0.485493
Mycbp2	0.466437	0.873554	0.195027
Scand1	0.466351	0.304251	0.574417
Arhgap23	0.466053	0.175175	0.659971
Rapgef1	0.465843	1.05129	0.075543
Dock1	0.465816	0.230795	0.622498
Tomm34	0.46546	0.296257	0.578262
Fbxw2	0.465287	0.438029	0.483459
Lin7c	0.465182	0.127757	0.690132
Gns	0.465138	0.623335	0.359673
Napa	0.464821	0.547625	0.409618
Rnf14	0.46459	0.598556	0.375279
Rab13	0.464432	0.59148	0.379734
Dusp1	0.464056	0.127757	0.688255
Papola	0.463888	0.485046	0.449782
Sltm	0.463825	0.671076	0.325658
Psma1	0.463714	0.270345	0.592627
Wnk1	0.463589	0.270345	0.592418
Srp9	0.463532	0.270345	0.592324
Denr	0.463215	0.658983	0.332704
Cox16	0.463156	0.557113	0.400518
Gng12	0.462754	0.277712	0.586115
Egln1	0.462505	0.602012	0.369501
Immt	0.462406	0.142588	0.675618
Aph1b	0.462372	0.59856	0.37158
Zbed3	0.462012	0.62774	0.351526
Sgta	0.461887	0.385548	0.51278
Tnks	0.461863	0.397072	0.505057
Zc3h14	0.461861	0.305654	0.565999
Rai1	0.461758	0.295441	0.572635
Itga6	0.461519	0.451273	0.46835
Pde4d	0.461268	0.220784	0.62159
Gpi1	0.461211	0.811373	0.227769
Arid1b	0.461063	0.424014	0.485762
Dcaf12	0.461058	0.516225	0.42428
Tuba1c	0.461057	0.307751	0.563261
Abhd17a	0.460889	0.220784	0.62096
Ccs	0.460468	0.548057	0.402075
Casp8	0.460297	0.525426	0.416878
Mrpl51	0.460266	0.317763	0.555269
Mapre3	0.460245	0.587261	0.375567
Fam110b	0.460226	0.567375	0.388793
Usp25	0.459593	0.302931	0.564034
Smim3	0.458962	0.576648	0.380504
Usp34	0.458606	0.295441	0.567382
Mapkbp1	0.45828	0.654649	0.327367
Mcmbp	0.458263	0.817574	0.218723
Apela	0.457735	0.469195	0.450095
Arhgap10	0.457662	0.696726	0.298287
Arhgap6	0.457656	0.127757	0.677588
Impdh2	0.457015	0.142588	0.666632
Tpr	0.456415	0.459331	0.454471
Sorbs2	0.455962	0.785325	0.236387
Mapk9	0.455855	0.577878	0.374507
Galnt2	0.455451	0.537132	0.400996
Lmo4	0.455153	0.481207	0.437784
Vasn	0.455082	0.302931	0.556515
Bcl7c	0.455034	0.175175	0.641607
Mier1	0.454974	0.127757	0.673119
Trps1	0.454908	0.48518	0.434727
Ncald	0.45483	0.429356	0.471813
Atp13a3	0.454784	0.542765	0.396131
Zfp638	0.454678	0.295441	0.560836
Aph1a	0.454515	0.116049	0.680159
Ankib1	0.454355	0.317763	0.545417
Acp1	0.454213	0.482512	0.435348
Pigq	0.45413	0.245394	0.593287
Susd6	0.453954	0.220784	0.609401
Sarnp	0.453536	0.727419	0.270947
Lgals3bp	0.453479	0.215151	0.612364
Tpp2	0.453251	0.527948	0.403454
Ldlrad3	0.45289	0.596105	0.357414
Ythdc1	0.452687	0.335224	0.530995
Fam13c	0.452639	0.258637	0.581973
Mbd3	0.452608	0.743085	0.258957
Api5	0.452492	0.786763	0.229645
Rbfox2	0.452459	0.554444	0.384469
Copa	0.452366	0.687341	0.295716
Tmem128	0.45201	0.364779	0.510164
Hmg20a	0.45162	0.744756	0.256196
Akap13	0.451599	0.341056	0.525294
Thap12	0.451469	0.368997	0.506451
Enah	0.451292	0.744051	0.256119
Hsd17b10	0.451131	0.397256	0.487048
Arap3	0.450948	0.684635	0.295158
Abcg2	0.450843	0.304251	0.54857
Qdpr	0.450829	0.59148	0.357062
Rnasek	0.450685	0.438262	0.458967
5730480H06Rik	0.450478	0.83704	0.192769
Chpf	0.450168	0.451273	0.449432
Plekhh3	0.44997	0.348541	0.517589
Mxra8	0.449689	0.269499	0.569816
Glg1	0.449676	0.386394	0.491864
Hnrnpdl	0.449598	0.457105	0.444593
Ctsh	0.449356	0	0.748927
Sos2	0.449266	0.179393	0.629182
Senp6	0.44884	0.631481	0.327079
Hadha	0.447939	0.727123	0.261816
Pank3	0.447788	0.438029	0.454293
Mapre2	0.447481	0.258637	0.573378
Ubald2	0.447404	0.336838	0.521116
Ergic1	0.447327	0.482324	0.423995
E130307A14Rik	0.447282	0.769656	0.232365
Srrm1	0.447266	0.565979	0.368124
Rnd3	0.447051	0.366242	0.500924
Akap7	0.447018	0.61402	0.335683
Nek9	0.446854	0.986978	0.0867708
Abca7	0.446845	0.777953	0.226107
Ecm1	0.446744	0.655433	0.307618
Dhx33	0.446689	0.59856	0.345442
Mrpl13	0.446616	0.364779	0.501174
Cnot1	0.446472	0.397072	0.479405
Elp2	0.44639	0.295441	0.547022
Dock7	0.446351	0.67628	0.293064
Mcm6	0.446165	0.161663	0.635833
2700046A07Rik	0.445772	0.243806	0.580417
Cdc42bpb	0.445396	0.304251	0.539493
Stx2	0.445335	0.52454	0.392531
Iigp1	0.445251	0.366242	0.497923
Pip4k2c	0.445232	0.72287	0.26014
Nrarp	0.444909	0.417842	0.462954
Ppm1g	0.444792	0.777953	0.222685
Atf4	0.444543	0.43733	0.449352
Lrch3	0.444302	0.341056	0.513133
Slc12a6	0.44428	0.6251	0.323733
Snx18	0.444185	0.47565	0.423208
Gnl2	0.444132	0.397256	0.475384
Cnot2	0.443524	0.321981	0.524552
Nr2c2	0.44319	0.116049	0.661284
Lipa	0.442957	0.412087	0.463537
Elavl1	0.442897	0.931403	0.117226
Ubxn4	0.442608	0.445946	0.440383
Edem3	0.442557	0.788158	0.212156
Tomm22	0.442504	0.64716	0.306066
Mta1	0.442486	0.175175	0.620694
Cep170	0.442469	0.658983	0.298127
Smarcc1	0.442206	0.862043	0.162314
Supt5	0.441636	0.220784	0.588871
Matr3	0.441633	0.547625	0.370971
Camk2d	0.441617	0.473668	0.420249
Tulp3	0.441397	0.127757	0.65049
Acap3	0.441377	0.277712	0.550487
Olfml2b	0.441159	0.810358	0.195027
Rab5b	0.441139	0.587026	0.343881
Edf1	0.441104	0.116049	0.657808
Begain	0.440625	0.43733	0.442822
Plxnb1	0.440489	0.499589	0.40109
Mfap3	0.440485	0.175175	0.617358
Dhx15	0.440024	0.952889	0.0981137
Hsd17b4	0.439534	0.372451	0.484256
Cct8	0.439237	0.606332	0.327841
Ccnl2	0.438994	0.733204	0.242855
Psmb2	0.438884	0.175175	0.614691
Eloc	0.4386	0.220784	0.583811
Mta2	0.438481	0.753143	0.228706
Sidt2	0.43834	0.179393	0.610972
Mtcl1	0.438095	0.336838	0.505599
Ier2	0.437931	0.270345	0.549655
Lman2	0.437675	0.364779	0.486273
Map2k3	0.437606	0.551148	0.361911
Rgs6	0.437415	0.670668	0.281913
Tbc1d1	0.437337	0.142588	0.633835
Leprot	0.437302	0.368997	0.482838
[truncated: 7,492 more rows]

## Sheet: DE genes pericytes
Table S3: Differentially expressed genes in P6 Gpr124 fl/fl vs Gpr124 ΔEC/ΔEC hyaloid pericytes. Fold change of mean log-normalized UMI counts (Gpr124 fl/fl vs Gpr124 ΔEC/ΔEC). Differential expression criteria: Absolute log2 fold change > 1 and p < 0.05. P, postnatal day; UMI, unique molecular identifier.
Gene	p-value	Log2 fold change
Ap2m1	0.00108349	2.51629
Marcksl1	0.00241332	1.59207
Fchsd2	0.00281179	4.5123
Nfkb1	0.00281179	4.21743
Efcab14	0.00281179	4.1417
Mau2	0.00281179	4.74902
Gphn	0.00281179	4.80777
Ube2q1	0.00281179	4.4
Airn	0.00281179	4.85811
Otud6b	0.00281179	4.50583
Sec31a	0.00281179	4.88107
Rps6kb1	0.00281179	4.76576
Arfgap3	0.00281179	4.06639
Tasor	0.00281179	4.34681
Bace1	0.00281179	5.17946
Twistnb	0.00281179	4.35934
Mus81	0.00281179	3.92899
Samd4	0.00296707	2.29304
Nek9	0.00343306	3.48479
Nfic	0.00558689	2.78824
Dhx15	0.00667186	3.55365
Gigyf1	0.00845335	2.74007
Ensa	0.0102533	3.77471
Rapgef1	0.0104695	4.58291
Adamts12	0.0106513	4.19428
Ddx6	0.0108627	2.75826
Vps29	0.0109207	3.59659
Zfp560	0.0119158	4.20451
Tmem9	0.0119158	4.20506
Pip4p2	0.0119158	4.26827
Grtp1	0.0119158	4.53361
9930021J03Rik	0.0119158	4.23961
Txndc5	0.0119158	4.26435
Cops7b	0.0119158	4.71682
Cnih4	0.0119158	4.44248
9330188P03Rik	0.0119158	4.44248
Supv3l1	0.0119158	4.49338
Mrpl58	0.0119158	4.45327
Zfp217	0.0119158	5.10673
Map1a	0.0119158	4.71887
Tbkbp1	0.0119158	3.27164
Rab6b	0.0119158	4.3191
Rabep1	0.0119158	3.50195
Otud7b	0.0119158	3.75072
Atf7ip	0.0119158	3.75072
Ptpn18	0.0119158	4.5125
Mrps27	0.0119158	4.97866
Dlg5	0.0119158	4.13267
Hapln1	0.0119158	3.45369
Nhsl1	0.0119158	4.59347
Fam135a	0.0119158	3.99405
Elp1	0.0119158	3.99405
Eef1e1	0.0119158	4.62641
Kcnq4	0.0119158	3.55943
Spats2l	0.0119158	4.42477
Pdzd11	0.0119158	3.87138
Zcchc7	0.0119158	4.19072
Frs2	0.0119158	3.71145
Zdhhc18	0.0119158	4.59666
Auts2	0.0119158	4.3148
Ube2j2	0.0119158	4.31991
Dcaf7	0.0119158	3.83417
Nde1	0.0119158	5.17565
Samd5	0.0119158	4.88825
Snrnp40	0.0119158	4.17278
Dpm3	0.0119158	4.33314
N4bp1	0.0119158	4.29206
Tmem68	0.0119158	4.39524
Hspa1b	0.0119158	4.09911
Trir	0.0124547	1.88555
Klhdc2	0.0134424	2.1951
Spred1	0.0139284	2.76117
Src	0.0148876	1.64904
Mef2d	0.0153797	1.59501
Arhgef12	0.0156121	1.9808
Sumo3	0.0157721	2.00968
Smarcc1	0.0159183	2.75106
Tmf1	0.0177607	3.29794
Smim15	0.0191497	3.09227
Itpr1	0.0198137	2.34979
Maml3	0.019884	3.07969
Elavl1	0.01993	3.12849
Lmbrd1	0.0215982	2.36355
Pmepa1	0.0224855	2.09993
Tspan14	0.0226605	2.35457
Yy1	0.0227262	2.48169
Ddah2	0.0252884	2.78907
Atad1	0.0260319	2.78663
5730480H06Rik	0.0271107	2.16145
Gas2l1	0.0279281	2.58787
Frk	0.0283754	1.99035
Tmem9b	0.0296482	2.35157
Svbp	0.0299214	2.50358
Tgfb2	0.0303523	1.97597
Ssh2	0.030877	2.7117
Slco3a1	0.03176	2.35733
Lrrk1	0.0339086	2.43726
Man2a2	0.035397	1.75299
Gps2	0.0372018	2.98349
Sh2d3c	0.0381622	1.7428
Fcgrt	0.0400306	1.82437
Trpv2	0.0400726	3.51081
Gsk3b	0.0406087	2.16692
Nbr1	0.0409548	1.52049
Camk1	0.0412538	1.9399
Gpatch8	0.0418317	2.47302
Chchd3	0.0422014	3.3433
Gsk3a	0.042825	2.65695
Eif4g3	0.0435034	1.84079
Galk1	0.0439709	3.09531
Pfn2	0.0441254	3.46517
Xist	0.04462	2.26353
Polr2c	0.0453398	3.75192
Arhgap17	0.0453398	3.97196
Gm47283	0.0453398	3.97196
Rnf146	0.0453398	4.06739
Tmem160	0.0453398	3.87281
Agtpbp1	0.0453398	3.87281
Trmt13	0.0453398	3.10367
Usp42	0.0453398	3.10367
Ppp1r37	0.0453398	3.10367
Hdac5	0.0453398	3.10367
Mycn	0.0453398	3.10367
Nol8	0.0453398	3.10367
Zfp952	0.0453398	3.10367
Gm26917	0.0453398	3.10367
Armcx6	0.0453398	3.10367
Mpzl1	0.0453398	3.91341
Fbxo36	0.0453398	3.58099
Ppip5k2	0.0453398	3.58099
Olfr1307	0.0453398	3.58099
Spg20	0.0453398	3.58099
Dnajc2	0.0453398	3.58099
Haus5	0.0453398	3.58099
Dync1li1	0.0453398	3.58099
Pde9a	0.0453398	3.58099
Kdm6a	0.0453398	3.58099
B830012L14Rik	0.0453398	4.25355
Swap70	0.0453398	3.65854
Tsga10	0.0453398	4.01266
Rnf144a	0.0453398	4.01266
Mkrn2	0.0453398	3.19098
Gssos2	0.0453398	4.38179
Eif2b2	0.0453398	4.08082
Dlg3	0.0453398	4.08082
Pfdn2	0.0453398	5.42911
Wrap73	0.0453398	3.51625
Dcp1a	0.0453398	3.51625
Zmym5	0.0453398	3.51625
Mfsd8	0.0453398	3.83735
Lta4h	0.0453398	3.83735
Ebpl	0.0453398	3.83735
Akr1b3	0.0453398	3.34803
Notch2	0.0453398	3.59727
2310057M21Rik	0.0453398	3.59727
Rbbp9	0.0453398	3.94179
Snx14	0.0453398	3.94179
Flcn	0.0453398	3.94179
Strada	0.0453398	3.94179
Gm47096	0.0453398	3.94179
Ctdspl2	0.0453398	4.01329
Pdzrn3	0.0453398	4.01329
Ptprm	0.0453398	4.01329
Rcn3	0.0453398	4.42474
Igf2bp3	0.0453398	3.46847
Atoh8	0.0453398	3.46847
Fbxo45	0.0453398	3.46847
Flywch1	0.0453398	3.46847
Phf6	0.0453398	3.46847
Gtf2b	0.0453398	3.78123
Aldh1a2	0.0453398	3.78123
Vps8	0.0453398	3.78123
Fam234a	0.0453398	3.55214
Proca1	0.0453398	4.59528
Ptpmt1	0.0453398	3.89163
Ctdp1	0.0453398	3.89163
Adamts4	0.0453398	5.14545
Hmgcl	0.0453398	3.9656
Mrps12	0.0453398	3.9656
Rflnb	0.0453398	3.74158
Enc1	0.0453398	3.74377
Kif16b	0.0453398	3.85494
Arl4c	0.0453398	3.93077
Htt	0.0453398	3.93077
Amer1	0.0453398	3.93077
Rassf5	0.0453398	3.44515
Gcc2	0.0453398	3.44515
Csdc2	0.0453398	3.44515
Tmem132a	0.0453398	3.96905
Grem2	0.0453398	4.72868
Bmp2k	0.0453398	4.4954
Fscn1	0.0453398	3.5145
Sart3	0.0453398	3.33035
Tk2	0.0453398	3.33035
Lgals8	0.0453398	4.78674
Terf2	0.0453398	5.31583
Stk36	0.0453398	2.69243
Slc25a25	0.0453398	2.69243
Jmjd7	0.0453398	2.69243
Nudt2	0.0453398	2.69243
Zfp958	0.0453398	2.69243
Zpr1	0.0453398	2.69243
0610010F05Rik	0.0453398	2.69243
Lsm12	0.0453398	2.69243
Vps13b	0.0453398	2.69243
Cdc42bpg	0.0453398	2.69243
Tsr2	0.0453398	2.69243
Abracl	0.0453398	4.09907
Rabepk	0.0453398	3.36002
Letm1	0.0453398	3.36002
Nsd2	0.0453398	3.36002
Col26a1	0.0453398	3.36002
Ipo7	0.0453398	3.36002
Mmp2	0.0453398	3.36002
Hacd3	0.0453398	3.36002
Rarb	0.0453398	3.36002
Gm26644	0.0453398	3.36002
Bmyc	0.0453398	2.88006
Arl5a	0.0453398	2.88006
Rilpl2	0.0453398	2.88006
Mex3c	0.0453398	2.88006
Vti1a	0.0453398	2.88006
Cdadc1	0.0453398	4.73989
Igsf9	0.0453398	3.11448
Actr5	0.0453398	3.11448
Abce1	0.0453398	3.11448
Gsta4	0.0453398	3.11448
Wdr92	0.0453398	3.11448
Lrrc75a	0.0453398	3.11448
Dvl2	0.0453398	3.11448
Rdh11	0.0453398	3.11448
Hunk	0.0453398	3.11448
Lcor	0.0453398	4.19713
Usp24	0.0453398	3.66531
Cklf	0.0453398	3.66531
Tmco3	0.0453398	4.38468
Dse	0.0453398	3.43348
Mrpl14	0.0453398	3.43348
Thy1	0.0453398	4.67137
Mark2	0.0453398	3.72108
Cnot4	0.0453398	5.00702
Egln2	0.0453398	4.33829
Creb3	0.0453398	3.21486
Adamts9	0.0453398	3.21486
Bad	0.0453398	3.21486
Ahctf1	0.0453398	2.80511
Tor4a	0.0453398	2.80511
Gmeb1	0.0453398	2.80511
Acot7	0.0453398	2.80511
Klhl7	0.0453398	2.80511
Nop14	0.0453398	2.80511
Acd	0.0453398	2.80511
Atg4d	0.0453398	2.80511
Olfr802	0.0453398	2.80511
Arhgap44	0.0453398	2.80511
Scfd1	0.0453398	2.80511
Gm4737	0.0453398	2.80511
Fbxw4	0.0453398	2.80511
Eif2d	0.0453398	3.76276
Rin2	0.0453398	3.76276
Gm42658	0.0453398	3.76276
Camta1	0.0453398	3.76276
Soat1	0.0453398	3.24699
Cisd2	0.0453398	3.24699
Lrch4	0.0453398	3.24699
Bola2	0.0453398	3.24699
Txnl4b	0.0453398	3.24699
Tagln3	0.0453398	3.24699
Rfng	0.0453398	4.21418
Rab24	0.0453398	4.21418
Tada3	0.0453398	3.02424
3110040N11Rik	0.0453398	3.02424
5830408C22Rik	0.0453398	3.02424
Mns1	0.0453398	3.02424
Zfpl1	0.0453398	3.02424
Cstf2	0.0453398	3.02424
Zfp651	0.0453398	3.83135
Tspan33	0.0453398	3.56732
Vps52	0.0453398	3.56732
Pcdhb20	0.0453398	3.56732
Rnpc3	0.0453398	4.27363
Naf1	0.0453398	4.27363
Ccdc32	0.0453398	3.81001
Elf1	0.0453398	3.32627
Gyg	0.0453398	3.62693
Prpsap2	0.0453398	4.53447
Gpatch2	0.0453398	4.73904
Mgat5	0.0453398	3.67138
Clp1	0.0453398	3.67138
Adam11	0.0453398	3.67138
Pigh	0.0453398	3.67138
Gli3	0.0453398	3.67138
Rslcan18	0.0453398	3.67138
Csf2ra	0.0453398	3.67138
Slc16a2	0.0453398	3.67138
Spg11	0.0453398	3.13087
Tmem11	0.0453398	3.13087
Ngly1	0.0453398	3.13087
Msl3	0.0453398	4.62307
Mapk8ip1	0.0453398	2.95659
Srd5a3	0.0453398	2.95659
Coq2	0.0453398	2.95659
Zswim4	0.0453398	2.95659
Trmt1	0.0453398	2.95659
Layn	0.0453398	2.95659
Sgpl1	0.0453398	2.95659
Adamtsl5	0.0453398	2.95659
Lrrc14	0.0453398	2.95659
Tap1	0.0453398	2.95659
Mta3	0.0453398	2.95659
Bbs1	0.0453398	2.95659
Abhd17b	0.0453398	2.95659
Akap17b	0.0453398	2.95659
Yrdc	0.0453398	3.1649
Babam2	0.0453398	3.1649
Cars	0.0453398	3.1649
Terf2ip	0.0453398	3.1649
2810402E24Rik	0.0453398	3.1649
Fabp5	0.045744	1.84311
Ankrd17	0.0459838	2.02955
Trip12	0.0482214	1.72345
Zc3hc1	0.0485724	3.44287
2900097C17Rik	0.0486775	2.37478
Atp5a1	0.0487267	1.01552
Timp3	0.0491035	1.97203
Lipo3	0.049417	1.71325
Mycbp2	0.0494987	2.66901
Rabac1	0.000402137	-3.22671
Sec62	0.000484443	-3.22759
Lrp6	0.000644056	-5.32242
Tbxa2r	0.00103388	-3.28213
Itpripl2	0.00156337	-3.13121
Stt3b	0.00194871	-4.44287
Pip5k1b	0.00194871	-4.2337
Atp6v0e	0.00194871	-4.0927
Nrp1	0.00194871	-4.83356
Hspd1	0.00194871	-4.36123
Ddx5	0.0022946	-1.31124
Ifi203	0.00475381	-3.16683
Bmpr2	0.00501298	-1.55213
Ctsh	0.0052274	-3.97301
Uckl1	0.0052274	-3.87121
Ube2l6	0.0052274	-3.58995
Fkbp4	0.0052274	-3.60624
Zc3h15	0.0052274	-3.96221
Cflar	0.0052274	-4.21969
Sash1	0.00524158	-3.47705
Olfml2a	0.00592247	-3.53753
Elk3	0.00775746	-2.55148
Rps15	0.00896083	-1.70702
Rps10	0.0105012	-1.04537
Ptms	0.0109968	-1.03231
Cox6a1	0.0116449	-1.45522
Rab8a	0.0128273	-3.33044
Osmr	0.0128273	-3.03233
Cab39	0.0128273	-3.83917
Dars	0.0128273	-4.02703
Arl6ip5	0.0128273	-3.12786
Maff	0.0128273	-3.29373
Crlf3	0.0128273	-3.65571
Pdxdc1	0.0128273	-3.21639
Sfswap	0.0128273	-3.26457
Lsm4	0.0128273	-3.40111
Hspa4	0.0128273	-3.77572
Ikbkb	0.0128273	-3.2932
Rgl1	0.0128273	-3.8026
Adamts15	0.0128273	-3.33719
Arih1	0.0128273	-3.34255
Pgd	0.0128273	-3.32341
Cpm	0.0128273	-3.4455
Klhl29	0.0128273	-3.39533
Pin4	0.0128273	-3.94421
Park7	0.0128273	-3.44507
Snx17	0.0128273	-3.43984
Sec61a2	0.0128273	-4.01042
4632427E13Rik	0.0128273	-3.50042
Sdha	0.0128273	-3.55941
Mrpl43	0.0128273	-3.61398
Mmp11	0.0128273	-4.76074
Snapc5	0.0128273	-3.91076
Lrrc32	0.0128273	-4.23307
Commd7	0.0128273	-3.32473
Sf3a2	0.0128273	-3.72794
Smim7	0.0128273	-3.13609
Crtc3	0.0128273	-3.54829
Mapk8	0.0128273	-2.86391
Eif4a1	0.0154805	-1.3295
Mtdh	0.0157871	-3.20668
Tbx2	0.0160065	-1.75797
Dynlt3	0.0161773	-2.87037
Rps27l	0.0164822	-2.37967
Morrbid	0.0173489	-2.42772
Slc49a4	0.018896	-2.00859
Cfl2	0.0196364	-2.70579
Atp2c1	0.0199095	-2.22773
Atp13a5	0.0200463	-1.91928
Dgkz	0.0204526	-2.7866
Cst3	0.0205133	-1.54919
Rapgef5	0.0209115	-2.5839
Rpl36a	0.0216698	-1.60711
Uba2	0.0231724	-1.88839
Ltbr	0.0236552	-2.02819
Ndufb2	0.024271	-1.61008
Stard8	0.0251893	-2.79197
Rplp2	0.0264908	-1.34432
Taf1d	0.0277434	-2.94559
Tsn	0.027883	-1.63864
Eno1	0.0289128	-2.36076
Rhog	0.0291067	-2.21135
Nisch	0.0294319	-1.49071
Ndufv1	0.0294732	-3.10001
Hnrnpll	0.0294732	-3.13139
Ssbp4	0.0294732	-3.03177
Nxf1	0.0294732	-3.11859
Pawr	0.0294732	-3.14636
Acaa1a	0.0294732	-3.14285
Bst2	0.0294732	-3.14597
Hdac4	0.0294732	-3.03804
Dync1li2	0.0294732	-3.05029
Rdh5	0.0294732	-3.08127
Focad	0.0294732	-3.19203
Yipf6	0.0294732	-3.09677
Cyba	0.0294732	-3.20243
Gm10687	0.0294732	-3.63888
Palm	0.0294732	-3.10503
Rnf25	0.0294732	-3.21231
Prelid3b	0.0294732	-3.1084
Fcho2	0.0294732	-3.22378
Hgs	0.0294732	-3.12996
Sec24b	0.0294732	-3.23414
Gatad2a	0.0294732	-3.1735
Ss18	0.0294732	-3.28522
Dgkd	0.0294732	-3.28519
Dnmt1	0.0294732	-3.30617
1110038F14Rik	0.0294732	-3.3395
Tbc1d2b	0.0294732	-3.3734
Pla1a	0.0294732	-3.25998
Snx9	0.0294732	-3.29079
Zranb1	0.0294732	-3.36974
Dcaf12l1	0.0294732	-3.89177
Armc1	0.0294732	-3.38816
Gm19500	0.0294732	-3.53755
Psmd14	0.0294732	-3.172
Bod1	0.0294732	-4.05638
Lrrc8d	0.0294732	-3.21243
Cttn	0.0294732	-3.42084
Tmem51	0.0294732	-3.09018
Rngtt	0.0294732	-3.09754
4930523C07Rik	0.0294732	-4.2126
Grk5	0.0294732	-3.11562
Col23a1	0.0294732	-3.12409
Kcnip3	0.0294732	-3.3919
Kmt5b	0.0294732	-3.36409
Abhd14b	0.0294732	-3.47397
Ndel1	0.0294732	-3.42866
Zfp281	0.0294732	-2.47766
Tsc22d3	0.0294732	-2.90669
Psme1	0.0294732	-3.63062
Ufc1	0.0294732	-3.4363
Elf2	0.0294732	-3.26949
2310030G06Rik	0.0294732	-2.63692
Cse1l	0.0294732	-2.94225
Zc3h4	0.0294732	-3.34892
Rabggta	0.0294732	-3.93715
Siah1a	0.0294732	-2.54728
Gtf2a2	0.0294732	-2.54783
Snhg6	0.0294732	-3.26643
Dennd4c	0.0294732	-2.5658
Ago3	0.0294732	-2.68543
Arl6ip4	0.0294732	-3.42511
Hic1	0.0294732	-3.42511
Cnrip1	0.0294732	-2.59884
Zc3h18	0.0294732	-3.0102
Trip4	0.0294732	-2.70044
Cd2ap	0.0294732	-3.42136
2410002F23Rik	0.0294732	-2.61672
Kmt5c	0.0294732	-2.62267
Stim2	0.0294732	-3.37267
Ipo5	0.0294732	-2.63246
Tm2d3	0.0294732	-3.0474
Gcsh	0.0294732	-2.67878
Bcap31	0.0294732	-3.52911
Exoc4	0.0294732	-3.50195
Prpf18	0.0294732	-2.73092
Pdcd6ip	0.0294732	-2.74074
Nr1d2	0.0294732	-2.84607
Gpkow	0.0294732	-2.84608
Ap3d1	0.0294732	-2.76379
Luzp1	0.0294732	-2.85952
Otulin	0.0294732	-2.85952
Tut4	0.0294732	-2.86015
Ddx52	0.0294732	-2.87508
Anapc13	0.0294732	-3.57881
C1qb	0.0294732	-2.79169
Shisa5	0.0294732	-2.79005
Zranb2	0.0294732	-2.92201
Snx2	0.0294732	-2.82967
Pdia4	0.0294732	-2.84731
Nrbp1	0.0294732	-2.96652
Pdcd10	0.0294732	-3.34186
Plcb4	0.0294732	-2.99867
Chka	0.0294732	-3.72317
Pomk	0.0294732	-2.93883
Gemin7	0.0294732	-2.94408
Ebf2	0.0294732	-2.94894
Gmps	0.0294732	-2.9556
Tm2d1	0.0294732	-3.07211
Eng	0.0306147	-2.1524
Gm4707	0.0308621	-2.16023
Tle5	0.0313324	-2.34974
Atxn10	0.0320291	-2.91581
Cyc1	0.0324385	-2.27661
Polr2a	0.0326481	-2.96761
Stxbp1	0.0326586	-2.50875
Bicd2	0.0336904	-2.60688
Rasgrp3	0.0337609	-2.69034
Eif3a	0.035754	-1.99809
Selenom	0.0360475	-1.84867
Klhl24	0.0366735	-2.03037
Ewsr1	0.0378865	-1.33914
Romo1	0.0381224	-2.10276
Nfkbia	0.0389305	-1.99309
Aph1a	0.0391957	-2.35531
Rpl37a	0.0392492	-1.12896
Cox6b1	0.039265	-1.75472
Tax1bp1	0.0394457	-1.94914
Atox1	0.0416774	-1.7241
Edf1	0.0417346	-2.29502
Kcnq1ot1	0.0422197	-1.7111
Snw1	0.0434684	-2.40528
Ube2k	0.0451391	-2.52261
Atpaf2	0.0452606	-2.11091
Pea15a	0.0454912	-1.33147
Itm2c	0.0455642	-1.29374
Srrt	0.0456267	-2.27954
Srrm2	0.0458508	-1.43584
Efemp2	0.0472912	-1.30521
Swi5	0.0479473	-2.04689
Rhbdf1	0.0487852	-1.03905
Slc19a1	0.0497231	-1.50324

## Sheet: GO terms pericytes (complete)
Table S3: GO Biological Process analysis of differentially expressed genes in P6 Gpr124 fl/fl vs Gpr124 ΔEC/ΔEC hyaloid pericytes. Upregulated and downregulated genes (Gpr124 fl/fl vs Gpr124 ΔEC/ΔEC) were analyzed separately. Inclusion criteria for GO terms: Overlapping genes ≥ 5 and p < 0.01. GO, gene ontology; P, postnatal day.
Input gene set	ID	Description	GeneRatio	BgRatio	RichFactor	FoldEnrichment	zScore	pvalue	p.adjust	qvalue	geneID	Count
Upregulated	GO:1900180	regulation of protein localization to nucleus	11/295	166/28905	0.0662651	6.49285	7.20688	1.20691e-06	1.20691e-06	0.00331581	Otud7b/Src/Sumo3/Tgfb2/Gsk3b/Flcn/Htt/Rassf5/Zpr1/Ipo7/Gli3	11
Upregulated	GO:0048193	Golgi vesicle transport	13/295	281/28905	0.0462633	4.53302	6.04318	7.23448e-06	7.23448e-06	0.00501961	Sec31a/Arfgap3/Vps29/Cnih4/Rab6b/Rabep1/Kif16b/Htt/Gcc2/Vti1a/Scfd1/Vps52/Bbs1	13
Upregulated	GO:0060348	bone development	12/295	242/28905	0.0495868	4.85866	6.12089	8.11885e-06	8.11885e-06	0.00501961	Adamts12/Src/Mef2d/Lrrk1/Notch2/Rflnb/Amer1/Nsd2/Rarb/Prpsap2/Gli3/Timp3	12
Upregulated	GO:0032204	regulation of telomere maintenance	8/295	99/28905	0.0808081	7.91782	7.00127	8.20446e-06	8.20446e-06	0.00501961	Src/Yy1/Terf2/Bmyc/Actr5/Acd/Naf1/Terf2ip	8
Upregulated	GO:0033044	regulation of chromosome organization	12/295	247/28905	0.048583	4.76031	6.02671	9.97631e-06	9.97631e-06	0.00501961	Tasor/Atf7ip/Src/Smarcc1/Yy1/Dync1li1/Terf2/Bmyc/Actr5/Acd/Naf1/Terf2ip	12
Upregulated	GO:0034504	protein localization to nucleus	14/295	337/28905	0.041543	4.07051	5.75727	1.09755e-05	1.09755e-05	0.00501961	Otud7b/Src/Sumo3/Elavl1/Tgfb2/Gsk3b/Nol8/Flcn/Htt/Rassf5/Zpr1/Ipo7/Gli3/Spg11	14
Upregulated	GO:0071514	genomic imprinting	5/295	31/28905	0.16129	15.8037	8.37393	1.46304e-05	1.46304e-05	0.00501961	Airn/Gsk3b/Gsk3a/Xist/Mycn	5
Upregulated	GO:0022411	cellular component disassembly	17/295	496/28905	0.0342742	3.35829	5.37949	1.58911e-05	1.58911e-05	0.00501961	Mrpl58/Map1a/Smarcc1/Gas2l1/Tgfb2/Gsk3b/Gsk3a/Swap70/Mfsd8/Snx14/Htt/Fscn1/Bmyc/Abce1/Atg4d/Eif2d/Cisd2	17
Upregulated	GO:2001252	positive regulation of chromosome organization	8/295	109/28905	0.0733945	7.19142	6.5761	1.6674e-05	1.6674e-05	0.00501961	Tasor/Atf7ip/Yy1/Terf2/Actr5/Acd/Naf1/Terf2ip	8
Upregulated	GO:0061351	neural precursor cell proliferation	11/295	222/28905	0.0495495	4.85502	5.85493	1.94788e-05	1.94788e-05	0.00501961	Rapgef1/Hapln1/Frs2/Nde1/Hdac5/Pde9a/Notch2/Rarb/Gli3/Slc16a2/Bbs1	11
Upregulated	GO:0061037	negative regulation of cartilage development	5/295	33/28905	0.151515	14.8459	8.08112	2.00977e-05	2.00977e-05	0.00501961	Adamts12/Tgfb2/Rflnb/Rarb/Gli3	5
Upregulated	GO:0042176	regulation of protein catabolic process	14/295	363/28905	0.0385675	3.77896	5.41034	2.50358e-05	2.50358e-05	0.00529877	Tmem9/Map1a/N4bp1/Hspa1b/Smarcc1/Tmf1/Gsk3b/Gsk3a/Mfsd8/Amer1/Tmem132a/Egln2/Timp3/Mycbp2	14
Upregulated	GO:0061448	connective tissue development	13/295	318/28905	0.0408805	4.0056	5.47257	2.67246e-05	2.67246e-05	0.00529877	Adamts12/Mef2d/Tgfb2/Mycn/Rflnb/Amer1/Slc25a25/Vps13b/Rarb/Mex3c/Fbxw4/Gli3/Bbs1	13
Upregulated	GO:0006470	protein dephosphorylation	11/295	230/28905	0.0478261	4.68615	5.69922	2.70014e-05	2.70014e-05	0.00529877	Ensa/Ptpn18/Ssh2/Swap70/Ctdspl2/Ptprm/Ptpmt1/Ctdp1/Htt/Camta1/Mgat5	11
Upregulated	GO:0016311	dephosphorylation	13/295	322/28905	0.0403727	3.95584	5.41609	3.04192e-05	3.04192e-05	0.00557152	Ensa/Pip4p2/Ptpn18/Src/Ssh2/Swap70/Ctdspl2/Ptprm/Ptpmt1/Ctdp1/Htt/Camta1/Mgat5	13
Upregulated	GO:2001233	regulation of apoptotic signaling pathway	15/295	436/28905	0.0344037	3.37098	5.06542	4.80506e-05	4.80506e-05	0.00776546	Rps6kb1/Eef1e1/Src/Tgfb2/Gsk3b/Kdm6a/Flcn/Ptpmt1/Htt/Mmp2/Bmyc/Creb3/Bad/Mapk8ip1/Zc3hc1	15
Upregulated	GO:0051147	regulation of muscle cell differentiation	9/295	167/28905	0.0538922	5.28052	5.63324	5.82584e-05	5.82584e-05	0.00889207	Frs2/Yy1/Gsk3b/Camk1/Gsk3a/Hdac5/Notch2/Ctdp1/Ankrd17	9
Upregulated	GO:0032984	protein-containing complex disassembly	11/295	254/28905	0.0433071	4.24336	5.27197	6.64129e-05	6.64129e-05	0.00923983	Mrpl58/Map1a/Smarcc1/Gas2l1/Gsk3b/Swap70/Mfsd8/Snx14/Htt/Bmyc/Abce1	11
Upregulated	GO:0006892	post-Golgi vesicle-mediated transport	7/295	99/28905	0.0707071	6.92809	5.9996	7.17512e-05	7.17512e-05	0.009387	Vps29/Rabep1/Kif16b/Vti1a/Scfd1/Vps52/Bbs1	7
Upregulated	GO:0051154	negative regulation of striated muscle cell differentiation	5/295	44/28905	0.113636	11.1344	6.83127	8.39054e-05	8.39054e-05	0.0104781	Frs2/Yy1/Gsk3a/Hdac5/Ctdp1	5
Upregulated	GO:0051148	negative regulation of muscle cell differentiation	6/295	71/28905	0.084507	8.28026	6.2367	8.81672e-05	8.81672e-05	0.0105316	Frs2/Yy1/Gsk3a/Hdac5/Ctdp1/Ankrd17	6
Upregulated	GO:0032206	positive regulation of telomere maintenance	6/295	72/28905	0.0833333	8.16525	6.18136	9.53666e-05	9.53666e-05	0.0105664	Yy1/Terf2/Actr5/Acd/Naf1/Terf2ip	6
Upregulated	GO:0045747	positive regulation of Notch signaling pathway	5/295	46/28905	0.108696	10.6503	6.65138	0.000104156	0.000104156	0.011006	Src/Tspan14/Tgfb2/Bmp2k/Rfng	5
Upregulated	GO:0051216	cartilage development	10/295	224/28905	0.0446429	4.37424	5.14795	0.000110648	0.000110648	0.0111238	Adamts12/Mef2d/Tgfb2/Mycn/Rflnb/Rarb/Mex3c/Fbxw4/Gli3/Bbs1	10
Upregulated	GO:0010633	negative regulation of epithelial cell migration	6/295	75/28905	0.08	7.83864	6.02156	0.000119808	0.000119808	0.0111238	Spred1/Svbp/Pfn2/Hdac5/Ptprm/Adamts9	6
Upregulated	GO:0030326	embryonic limb morphogenesis	8/295	144/28905	0.0555556	5.4435	5.42795	0.000121467	0.000121467	0.0111238	Tgfb2/Mycn/Notch2/Aldh1a2/Rarb/Acd/Fbxw4/Gli3	8
Upregulated	GO:0035113	embryonic appendage morphogenesis	8/295	144/28905	0.0555556	5.4435	5.42795	0.000121467	0.000121467	0.0111238	Tgfb2/Mycn/Notch2/Aldh1a2/Rarb/Acd/Fbxw4/Gli3	8
Upregulated	GO:0072583	clathrin-dependent endocytosis	5/295	49/28905	0.102041	9.99827	6.40133	0.000141323	0.000141323	0.0118644	Ap2m1/Fchsd2/Lmbrd1/Bmp2k/Ccdc32	5
Upregulated	GO:0016197	endosomal transport	11/295	277/28905	0.0397112	3.89102	4.90938	0.000142885	0.000142885	0.0118644	Vps29/Rab6b/Src/Kif16b/Arl4c/Htt/Gcc2/Vps13b/Vti1a/Arhgap44/Vps52	11
Upregulated	GO:0000723	telomere maintenance	8/295	148/28905	0.0540541	5.29638	5.321	0.000146828	0.000146828	0.0118644	Src/Yy1/Terf2/Bmyc/Actr5/Acd/Naf1/Terf2ip	8
Upregulated	GO:0040029	epigenetic regulation of gene expression	10/295	238/28905	0.0420168	4.11693	4.90294	0.000181315	0.000181315	0.0137007	Airn/Tasor/Atf7ip/Gsk3b/Gsk3a/Xist/Mycn/Bmyc/Lcor/Trip12	10
Upregulated	GO:2001242	regulation of intrinsic apoptotic signaling pathway	9/295	194/28905	0.0463918	4.54561	5.03151	0.000182372	0.000182372	0.0137007	Src/Kdm6a/Flcn/Ptpmt1/Mmp2/Bmyc/Creb3/Bad/Mapk8ip1	9
Upregulated	GO:0032200	telomere organization	8/295	153/28905	0.0522876	5.1233	5.19263	0.000184513	0.000184513	0.0137007	Src/Yy1/Terf2/Bmyc/Actr5/Acd/Naf1/Terf2ip	8
Upregulated	GO:0098876	vesicle-mediated transport to the plasma membrane	8/295	156/28905	0.0512821	5.02477	5.11827	0.000210706	0.000210706	0.0152339	Vps29/Rabep1/Arl4c/Vps13b/Vti1a/Arhgap44/Vps52/Bbs1	8
Upregulated	GO:0035088	establishment or maintenance of apical/basal cell polarity	5/295	54/28905	0.0925926	9.0725	6.02915	0.000224839	0.000224839	0.0154429	Dlg5/Pdzd11/Dlg3/Fscn1/Mark2	5
Upregulated	GO:0061245	establishment or maintenance of bipolar cell polarity	5/295	54/28905	0.0925926	9.0725	6.02915	0.000224839	0.000224839	0.0154429	Dlg5/Pdzd11/Dlg3/Fscn1/Mark2	5
Upregulated	GO:0010632	regulation of epithelial cell migration	10/295	250/28905	0.04	3.91932	4.70742	0.000269033	0.000269033	0.0173656	Spred1/Src/Svbp/Tgfb2/Pfn2/Hdac5/Ptprm/Atoh8/Adamts9/Rin2	10
Upregulated	GO:2000058	regulation of ubiquitin-dependent protein catabolic process	8/295	162/28905	0.0493827	4.83867	4.97512	0.000272273	0.000272273	0.0173656	Map1a/N4bp1/Hspa1b/Sumo3/Smarcc1/Gsk3b/Gsk3a/Agtpbp1	8
Upregulated	GO:1902117	positive regulation of organelle assembly	6/295	88/28905	0.0681818	6.68066	5.41935	0.0002887	0.0002887	0.0173656	Src/Gsk3b/Wrap73/Htt/Fscn1/Mns1	6
Upregulated	GO:0010596	negative regulation of endothelial cell migration	5/295	57/28905	0.0877193	8.595	5.82826	0.000290359	0.000290359	0.0173656	Spred1/Svbp/Hdac5/Ptprm/Adamts9	5
Upregulated	GO:0060828	regulation of canonical Wnt signaling pathway	10/295	253/28905	0.0395257	3.87285	4.66044	0.000295796	0.000295796	0.0173656	Nfkb1/Rapgef1/Tmem9/Src/Lrrk1/Gsk3b/Gsk3a/Rnf146/Amer1/Gli3	10
Upregulated	GO:0032456	endocytic recycling	6/295	89/28905	0.0674157	6.6056	5.37813	0.000306952	0.000306952	0.0173656	Vps29/Arl4c/Vps13b/Vti1a/Arhgap44/Vps52	6
Upregulated	GO:0046578	regulation of Ras protein signal transduction	5/295	58/28905	0.0862069	8.44681	5.76455	0.000315125	0.000315125	0.0173656	Rapgef1/Src/Tgfb2/Notch2/Flcn	5
Upregulated	GO:0016055	Wnt signaling pathway	14/295	462/28905	0.030303	2.96918	4.33262	0.000316041	0.000316041	0.0173656	Nfkb1/Rapgef1/Tmem9/Src/Lrrk1/Gsk3b/Gsk3a/Rnf146/Amer1/Tmem132a/Dvl2/Mark2/Fbxw4/Gli3	14
Upregulated	GO:0198738	cell-cell signaling by wnt	14/295	464/28905	0.0301724	2.95639	4.31392	0.000330019	0.000330019	0.0177389	Nfkb1/Rapgef1/Tmem9/Src/Lrrk1/Gsk3b/Gsk3a/Rnf146/Amer1/Tmem132a/Dvl2/Mark2/Fbxw4/Gli3	14
Upregulated	GO:0072698	protein localization to microtubule cytoskeleton	5/295	59/28905	0.0847458	8.30365	5.70235	0.000341458	0.000341458	0.0177389	Map1a/Gas2l1/Gsk3b/Htt/Abhd17b	5
Upregulated	GO:0031346	positive regulation of cell projection organization	14/295	467/28905	0.0299786	2.93739	4.28606	0.000351979	0.000351979	0.0177389	Rapgef1/Auts2/Src/Itpr1/Trpv2/Gsk3b/Camk1/Eif2b2/Wrap73/Enc1/Htt/Fscn1/Mark2/Mns1	14
Upregulated	GO:0060070	canonical Wnt signaling pathway	11/295	308/28905	0.0357143	3.49939	4.47797	0.000355118	0.000355118	0.0177389	Nfkb1/Rapgef1/Tmem9/Src/Lrrk1/Gsk3b/Gsk3a/Rnf146/Amer1/Dvl2/Gli3	11
Upregulated	GO:0060491	regulation of cell projection assembly	9/295	217/28905	0.0414747	4.06381	4.60016	0.000416479	0.000416479	0.0204325	Auts2/Src/Gsk3b/Pfn2/Wrap73/Htt/Fscn1/Arhgap44/Mns1	9
Upregulated	GO:2000628	regulation of miRNA metabolic process	6/295	95/28905	0.0631579	6.1884	5.14346	0.000436286	0.000436286	0.0207076	Nfkb1/Yy1/Tgfb2/Notch2/Atoh8/Bmyc	6
Upregulated	GO:0044380	protein localization to cytoskeleton	5/295	63/28905	0.0793651	7.77643	5.46751	0.000463758	0.000463758	0.0215952	Map1a/Gas2l1/Gsk3b/Htt/Abhd17b	5
Upregulated	GO:2000177	regulation of neural precursor cell proliferation	7/295	135/28905	0.0518519	5.0806	4.82561	0.000488839	0.000488839	0.0220167	Rapgef1/Hapln1/Hdac5/Pde9a/Notch2/Gli3/Slc16a2	7
Upregulated	GO:1903050	regulation of proteolysis involved in protein catabolic process	9/295	224/28905	0.0401786	3.93682	4.48059	0.000523879	0.000523879	0.0225634	Map1a/N4bp1/Hspa1b/Sumo3/Smarcc1/Tmf1/Gsk3b/Gsk3a/Agtpbp1	9
Upregulated	GO:2000630	positive regulation of miRNA metabolic process	5/295	65/28905	0.0769231	7.53716	5.35771	0.000536024	0.000536024	0.0225634	Nfkb1/Tgfb2/Notch2/Atoh8/Bmyc	5
Upregulated	GO:0030111	regulation of Wnt signaling pathway	11/295	324/28905	0.0339506	3.32659	4.27645	0.000542295	0.000542295	0.0225634	Nfkb1/Rapgef1/Tmem9/Src/Lrrk1/Gsk3b/Gsk3a/Rnf146/Amer1/Tmem132a/Gli3	11
Upregulated	GO:0035107	appendage morphogenesis	8/295	180/28905	0.0444444	4.3548	4.58463	0.000550253	0.000550253	0.0225634	Tgfb2/Mycn/Notch2/Aldh1a2/Rarb/Acd/Fbxw4/Gli3	8
Upregulated	GO:0035108	limb morphogenesis	8/295	180/28905	0.0444444	4.3548	4.58463	0.000550253	0.000550253	0.0225634	Tgfb2/Mycn/Notch2/Aldh1a2/Rarb/Acd/Fbxw4/Gli3	8
Upregulated	GO:0016236	macroautophagy	10/295	275/28905	0.0363636	3.56302	4.33649	0.000568438	0.000568438	0.0229017	Nbr1/Gsk3a/Mfsd8/Snx14/Htt/Lgals8/Vti1a/Atg4d/Scfd1/Spg11	10
Upregulated	GO:0007528	neuromuscular junction development	5/295	66/28905	0.0757576	7.42296	5.30454	0.000575176	0.000575176	0.0229017	Gphn/Gsk3b/Pdzrn3/Spg11/Mycbp2	5
Upregulated	GO:0010631	epithelial cell migration	11/295	329/28905	0.0334347	3.27603	4.21605	0.000615435	0.000615435	0.0238145	Spred1/Src/Svbp/Tgfb2/Pfn2/Hdac5/Ptprm/Atoh8/Lgals8/Adamts9/Rin2	11
Upregulated	GO:0030177	positive regulation of Wnt signaling pathway	7/295	141/28905	0.0496454	4.86441	4.67088	0.000633699	0.000633699	0.0240175	Nfkb1/Tmem9/Src/Lrrk1/Rnf146/Amer1/Tmem132a	7
Upregulated	GO:0090132	epithelium migration	11/295	331/28905	0.0332326	3.25623	4.19222	0.000646907	0.000646907	0.0240175	Spred1/Src/Svbp/Tgfb2/Pfn2/Hdac5/Ptprm/Atoh8/Lgals8/Adamts9/Rin2	11
Upregulated	GO:0090130	tissue migration	11/295	333/28905	0.033033	3.23668	4.16856	0.000679708	0.000679708	0.0245712	Spred1/Src/Svbp/Tgfb2/Pfn2/Hdac5/Ptprm/Atoh8/Lgals8/Adamts9/Rin2	11
Upregulated	GO:0007369	gastrulation	8/295	188/28905	0.0425532	4.16949	4.42721	0.000731676	0.000731676	0.0251128	Tasor/Frs2/Lmbrd1/Kdm6a/Atoh8/Kif16b/Htt/Dvl2	8
Upregulated	GO:0010639	negative regulation of organelle organization	12/295	390/28905	0.0307692	3.01486	4.06792	0.000732851	0.000732851	0.0251128	Map1a/Src/Gas2l1/Ssh2/Pfn2/Dync1li1/Swap70/Flcn/Terf2/Acd/Scfd1/Terf2ip	12
Upregulated	GO:0048592	eye morphogenesis	8/295	189/28905	0.042328	4.14743	4.40815	0.000757389	0.000757389	0.0251128	Frs2/Yy1/Agtpbp1/Notch2/Ptprm/Rarb/Thy1/Gli3	8
Upregulated	GO:0097193	intrinsic apoptotic signaling pathway	11/295	338/28905	0.0325444	3.1888	4.1102	0.000767815	0.000767815	0.0251128	Src/Itpr1/Gsk3b/Kdm6a/Flcn/Ptpmt1/Mmp2/Bmyc/Creb3/Bad/Mapk8ip1	11
Upregulated	GO:0051153	regulation of striated muscle cell differentiation	6/295	108/28905	0.0555556	5.4435	4.6978	0.000860404	0.000860404	0.0274866	Frs2/Yy1/Gsk3b/Gsk3a/Hdac5/Ctdp1	6
Upregulated	GO:0090263	positive regulation of canonical Wnt signaling pathway	6/295	108/28905	0.0555556	5.4435	4.6978	0.000860404	0.000860404	0.0274866	Nfkb1/Tmem9/Src/Lrrk1/Rnf146/Amer1	6
Upregulated	GO:0061035	regulation of cartilage development	5/295	73/28905	0.0684932	6.71117	4.96112	0.000912292	0.000912292	0.0288092	Adamts12/Tgfb2/Rflnb/Rarb/Gli3	5
Upregulated	GO:0010586	miRNA metabolic process	6/295	110/28905	0.0545455	5.34453	4.63566	0.000946896	0.000946896	0.0295622	Nfkb1/Yy1/Tgfb2/Notch2/Atoh8/Bmyc	6
Upregulated	GO:0031503	protein-containing complex localization	9/295	245/28905	0.0367347	3.59938	4.14902	0.000989535	0.000989535	0.0302996	Ap2m1/Gphn/Atad1/Gsk3b/Dlg3/Terf2/Abce1/Arhgap44/Bbs1	9
Upregulated	GO:0007006	mitochondrial membrane organization	6/295	111/28905	0.0540541	5.29638	4.60516	0.000992573	0.000992573	0.0302996	Gsk3b/Chchd3/Gsk3a/Letm1/Bad/Tmem11	6
Upregulated	GO:0035303	regulation of dephosphorylation	6/295	112/28905	0.0535714	5.24909	4.57502	0.00103992	0.00103992	0.0311576	Ensa/Src/Swap70/Htt/Camta1/Mgat5	6
Upregulated	GO:0009895	negative regulation of catabolic process	11/295	353/28905	0.0311615	3.0533	3.94141	0.00109084	0.00109084	0.0315596	Map1a/N4bp1/Smarcc1/Elavl1/Flcn/Igf2bp3/Tmem132a/Scfd1/Naf1/Timp3/Mycbp2	11
Upregulated	GO:0046824	positive regulation of nucleocytoplasmic transport	5/295	76/28905	0.0657895	6.44625	4.82748	0.00109463	0.00109463	0.0315596	Gsk3b/Camk1/Ctdspl2/Zpr1/Gli3	5
Upregulated	GO:0006401	RNA catabolic process	10/295	300/28905	0.0333333	3.2661	4.00636	0.00110277	0.00110277	0.0315596	Samd4/Supv3l1/Zcchc7/Trir/Elavl1/Dcp1a/Igf2bp3/Csdc2/Zpr1/Naf1	10
Upregulated	GO:0014706	striated muscle tissue development	10/295	301/28905	0.0332226	3.25525	3.99389	0.00113062	0.00113062	0.0317159	Frs2/Yy1/Tgfb2/Gsk3b/Gsk3a/Hdac5/Aldh1a2/Ctdp1/Rarb/Adamts9	10
Upregulated	GO:0031507	heterochromatin formation	6/295	114/28905	0.0526316	5.157	4.51581	0.00113981	0.00113981	0.0317159	Airn/Tasor/Atf7ip/Xist/Bmyc/Trip12	6
Upregulated	GO:1904705	regulation of vascular associated smooth muscle cell proliferation	5/295	77/28905	0.0649351	6.36254	4.78453	0.00116101	0.00116101	0.0317159	Frs2/Src/Mef2d/Mmp2/Timp3	5
Upregulated	GO:1901873	regulation of post-translational protein modification	9/295	252/28905	0.0357143	3.49939	4.04651	0.0012041	0.0012041	0.0317159	N4bp1/Svbp/Gps2/Gsk3b/Gsk3a/Flcn/Amer1/Rassf5/Mycbp2	9
Upregulated	GO:0010833	telomere maintenance via telomere lengthening	5/295	78/28905	0.0641026	6.28096	4.74233	0.00123033	0.00123033	0.0317159	Src/Terf2/Acd/Naf1/Terf2ip	5
Upregulated	GO:0097192	extrinsic apoptotic signaling pathway in absence of ligand	5/295	78/28905	0.0641026	6.28096	4.74233	0.00123033	0.00123033	0.0317159	Tgfb2/Gsk3b/Gsk3a/Bad/Zc3hc1	5
Upregulated	GO:1902893	regulation of miRNA transcription	5/295	78/28905	0.0641026	6.28096	4.74233	0.00123033	0.00123033	0.0317159	Yy1/Tgfb2/Notch2/Atoh8/Bmyc	5
Upregulated	GO:0022612	gland morphogenesis	7/295	158/28905	0.0443038	4.34102	4.27605	0.00123487	0.00123487	0.0317159	Nfkb1/Frs2/Src/Itpr1/Notch2/Mmp2/Gli3	7
Upregulated	GO:0006913	nucleocytoplasmic transport	11/295	359/28905	0.0306407	3.00227	3.87639	0.0012481	0.0012481	0.0317159	Elavl1/Gsk3b/Camk1/Strada/Ctdspl2/Zpr1/Ipo7/Abce1/Ahctf1/Gli3/Spg11	11
Upregulated	GO:0051169	nuclear transport	11/295	359/28905	0.0306407	3.00227	3.87639	0.0012481	0.0012481	0.0317159	Elavl1/Gsk3b/Camk1/Strada/Ctdspl2/Zpr1/Ipo7/Abce1/Ahctf1/Gli3/Spg11	11
Upregulated	GO:0048762	mesenchymal cell differentiation	9/295	254/28905	0.0354331	3.47184	4.01789	0.00127185	0.00127185	0.0317159	Tasor/Dlg5/Spred1/Tgfb2/Gsk3b/Aldh1a2/Rflnb/Amer1/Timp3	9
Upregulated	GO:0035304	regulation of protein dephosphorylation	5/295	79/28905	0.0632911	6.20146	4.70086	0.00130266	0.00130266	0.0317159	Ensa/Swap70/Htt/Camta1/Mgat5	5
Upregulated	GO:0042177	negative regulation of protein catabolic process	6/295	117/28905	0.0512821	5.02477	4.42955	0.00130324	0.00130324	0.0317159	Map1a/N4bp1/Smarcc1/Tmem132a/Timp3/Mycbp2	6
Upregulated	GO:0048661	positive regulation of smooth muscle cell proliferation	6/295	117/28905	0.0512821	5.02477	4.42955	0.00130324	0.00130324	0.0317159	Rps6kb1/Frs2/Src/Mef2d/Gsk3b/Mmp2	6
Upregulated	GO:0051098	regulation of binding	11/295	361/28905	0.0304709	2.98563	3.85502	0.00130449	0.00130449	0.0317159	Src/Sumo3/Tgfb2/Gsk3b/Camk1/Hdac5/Gtf2b/Tmem132a/Grem2/Acd/Rfng	11
Upregulated	GO:0051222	positive regulation of protein transport	10/295	309/28905	0.0323625	3.17097	3.89594	0.00137478	0.00137478	0.0326387	Src/Itpr1/Tgfb2/Gsk3b/Camk1/Ctdspl2/Tmem132a/Zpr1/Bad/Gli3	10
Upregulated	GO:0038034	signal transduction in absence of ligand	5/295	80/28905	0.0625	6.12394	4.6601	0.00137808	0.00137808	0.0326387	Tgfb2/Gsk3b/Gsk3a/Bad/Zc3hc1	5
Upregulated	GO:0061614	miRNA transcription	5/295	80/28905	0.0625	6.12394	4.6601	0.00137808	0.00137808	0.0326387	Yy1/Tgfb2/Notch2/Atoh8/Bmyc	5
Upregulated	GO:1904951	positive regulation of establishment of protein localization	11/295	364/28905	0.0302198	2.96103	3.82323	0.00139298	0.00139298	0.0327097	Src/Itpr1/Tgfb2/Gsk3b/Camk1/Gsk3a/Ctdspl2/Tmem132a/Zpr1/Bad/Gli3	11
Upregulated	GO:0035282	segmentation	6/295	119/28905	0.0504202	4.94032	4.37367	0.00142174	0.00142174	0.0327181	Tasor/Frs2/Kdm6a/Aldh1a2/Dvl2/Acd	6
Upregulated	GO:0120034	positive regulation of plasma membrane bounded cell projection assembly	6/295	120/28905	0.05	4.89915	4.34619	0.00148398	0.00148398	0.0331467	Auts2/Gsk3b/Wrap73/Htt/Fscn1/Mns1	6
Upregulated	GO:0031396	regulation of protein ubiquitination	8/295	211/28905	0.0379147	3.715	4.01926	0.00153339	0.00153339	0.0333725	N4bp1/Svbp/Gps2/Gsk3b/Gsk3a/Amer1/Rassf5/Mycbp2	8
Upregulated	GO:0010611	regulation of cardiac muscle hypertrophy	5/295	82/28905	0.0609756	5.97458	4.58062	0.00153851	0.00153851	0.0333725	Yy1/Gsk3b/Gsk3a/Pde9a/Ctdp1	5
Upregulated	GO:1990874	vascular associated smooth muscle cell proliferation	5/295	82/28905	0.0609756	5.97458	4.58062	0.00153851	0.00153851	0.0333725	Frs2/Src/Mef2d/Mmp2/Timp3	5
Upregulated	GO:0060485	mesenchyme development	10/295	314/28905	0.0318471	3.12048	3.83632	0.00154805	0.00154805	0.0333725	Tasor/Dlg5/Spred1/Tgfb2/Gsk3b/Aldh1a2/Rflnb/Htt/Amer1/Timp3	10
Upregulated	GO:0050678	regulation of epithelial cell proliferation	12/295	426/28905	0.028169	2.76009	3.71627	0.00155482	0.00155482	0.0333725	Frs2/Itpr1/Tgfb2/Mycn/Notch2/Flcn/Ptprm/Atoh8/Aldh1a2/Bmyc/Bad/Mta3	12
Upregulated	GO:0002062	chondrocyte differentiation	6/295	122/28905	0.0491803	4.81884	4.29214	0.00161468	0.00161468	0.0341259	Adamts12/Mef2d/Rflnb/Rarb/Mex3c/Gli3	6
Upregulated	GO:0048736	appendage development	8/295	213/28905	0.0375587	3.68011	3.98652	0.00162719	0.00162719	0.0341259	Tgfb2/Mycn/Notch2/Aldh1a2/Rarb/Acd/Fbxw4/Gli3	8
Upregulated	GO:0060173	limb development	8/295	213/28905	0.0375587	3.68011	3.98652	0.00162719	0.00162719	0.0341259	Tgfb2/Mycn/Notch2/Aldh1a2/Rarb/Acd/Fbxw4/Gli3	8
Upregulated	GO:0120032	regulation of plasma membrane bounded cell projection assembly	8/295	214/28905	0.0373832	3.66292	3.9703	0.00167577	0.00167577	0.0347701	Auts2/Gsk3b/Pfn2/Wrap73/Htt/Fscn1/Arhgap44/Mns1	8
Upregulated	GO:2000278	regulation of DNA biosynthetic process	6/295	123/28905	0.0487805	4.77966	4.26556	0.00168322	0.00168322	0.0347701	Src/Gsk3b/Dnajc2/Terf2/Acd/Naf1	6
Upregulated	GO:1903008	organelle disassembly	7/295	167/28905	0.0419162	4.10707	4.08896	0.00169701	0.00169701	0.0347933	Mrpl58/Gsk3a/Htt/Abce1/Atg4d/Eif2d/Cisd2	7
Upregulated	GO:0001654	eye development	12/295	431/28905	0.0278422	2.72807	3.67034	0.00171355	0.00171355	0.0348721	Frs2/Spred1/Yy1/Tgfb2/Agtpbp1/Notch2/Ptprm/Aldh1a2/Slc25a25/Rarb/Thy1/Gli3	12
Upregulated	GO:0030336	negative regulation of cell migration	10/295	319/28905	0.031348	3.07157	3.77789	0.00173864	0.00173864	0.0349183	Dlg5/Spred1/Svbp/Gsk3b/Pfn2/Hdac5/Flcn/Ptprm/Thy1/Adamts9	10
Upregulated	GO:0007389	pattern specification process	13/295	491/28905	0.0264766	2.59426	3.61796	0.0017432	0.0017432	0.0349183	Tasor/Frs2/Yy1/Kdm6a/Notch2/Aldh1a2/Htt/Grem2/Dvl2/Acd/Rfng/Mns1/Gli3	13
Upregulated	GO:0032434	regulation of proteasomal ubiquitin-dependent protein catabolic process	6/295	124/28905	0.0483871	4.74112	4.23926	0.00175394	0.00175394	0.0349183	Map1a/N4bp1/Hspa1b/Smarcc1/Gsk3b/Gsk3a	6
Upregulated	GO:0014743	regulation of muscle hypertrophy	5/295	85/28905	0.0588235	5.76371	4.46621	0.00180435	0.00180435	0.0349667	Yy1/Gsk3b/Gsk3a/Pde9a/Ctdp1	5
Upregulated	GO:0150063	visual system development	12/295	434/28905	0.0276498	2.70921	3.64309	0.00181502	0.00181502	0.0349667	Frs2/Spred1/Yy1/Tgfb2/Agtpbp1/Notch2/Ptprm/Aldh1a2/Slc25a25/Rarb/Thy1/Gli3	12
Upregulated	GO:0034250	positive regulation of amide metabolic process	7/295	169/28905	0.0414201	4.05847	4.04916	0.00181589	0.00181589	0.0349667	Otud6b/Rps6kb1/Samd4/Mrps27/Elavl1/Gsk3a/Eif4g3	7
Upregulated	GO:0051054	positive regulation of DNA metabolic process	10/295	321/28905	0.0311526	3.05243	3.75483	0.00182001	0.00182001	0.0349667	Smarcc1/Yy1/Gsk3b/Terf2/Nsd2/Actr5/Acd/Naf1/Babam2/Terf2ip	10
Upregulated	GO:0008088	axo-dendritic transport	5/295	86/28905	0.0581395	5.69669	4.42927	0.00190001	0.00190001	0.0360405	Map1a/Agtpbp1/Htt/Terf2/Spg11	5
Upregulated	GO:0016482	cytosolic transport	6/295	126/28905	0.047619	4.66586	4.18749	0.00190214	0.00190214	0.0360405	Vps29/Rab6b/Kif16b/Gcc2/Vti1a/Vps52	6
Upregulated	GO:0048880	sensory system development	12/295	438/28905	0.0273973	2.68447	3.60711	0.00195794	0.00195794	0.0368438	Frs2/Spred1/Yy1/Tgfb2/Agtpbp1/Notch2/Ptprm/Aldh1a2/Slc25a25/Rarb/Thy1/Gli3	12
Upregulated	GO:0090596	sensory organ morphogenesis	10/295	325/28905	0.0307692	3.01486	3.70926	0.00199198	0.00199198	0.0372293	Kcnq4/Frs2/Yy1/Agtpbp1/Notch2/Ptprm/Rarb/Dvl2/Thy1/Gli3	10
Upregulated	GO:0000209	protein polyubiquitination	9/295	272/28905	0.0330882	3.24209	3.77254	0.00203084	0.00203084	0.0376992	Ube2q1/Ube2j2/Gps2/Rnf146/Rnf144a/Mkrn2/Fbxo45/Trip12/Mycbp2	9
Upregulated	GO:0043010	camera-type eye development	11/295	383/28905	0.0287206	2.81413	3.62919	0.00207499	0.00207499	0.0382602	Frs2/Spred1/Yy1/Tgfb2/Agtpbp1/Notch2/Ptprm/Aldh1a2/Slc25a25/Thy1/Gli3	11
Upregulated	GO:0042147	retrograde transport, endosome to Golgi	5/295	89/28905	0.0561798	5.50467	4.32187	0.00220924	0.00220924	0.0404639	Vps29/Rab6b/Gcc2/Vti1a/Vps52	5
Upregulated	GO:2000146	negative regulation of cell motility	10/295	332/28905	0.0301205	2.9513	3.63116	0.00232435	0.00232435	0.0422903	Dlg5/Spred1/Svbp/Gsk3b/Pfn2/Hdac5/Flcn/Ptprm/Thy1/Adamts9	10
Upregulated	GO:0003002	regionalization	12/295	448/28905	0.0267857	2.62455	3.5189	0.00235605	0.00235605	0.0423301	Tasor/Frs2/Yy1/Kdm6a/Notch2/Aldh1a2/Htt/Grem2/Dvl2/Acd/Mns1/Gli3	12
Upregulated	GO:0033157	regulation of intracellular protein transport	7/295	177/28905	0.039548	3.87504	3.8959	0.00235735	0.00235735	0.0423301	Gsk3b/Camk1/Ctdspl2/Gcc2/Zpr1/Arhgap44/Gli3	7
Upregulated	GO:0010594	regulation of endothelial cell migration	7/295	178/28905	0.0393258	3.85327	3.87738	0.00243292	0.00243292	0.0431054	Spred1/Svbp/Hdac5/Ptprm/Atoh8/Adamts9/Rin2	7
Upregulated	GO:0048738	cardiac muscle tissue development	9/295	280/28905	0.0321429	3.14946	3.67	0.00246737	0.00246737	0.0431054	Frs2/Yy1/Tgfb2/Gsk3b/Gsk3a/Aldh1a2/Ctdp1/Rarb/Adamts9	9
Upregulated	GO:0048562	embryonic organ morphogenesis	10/295	335/28905	0.0298507	2.92487	3.59831	0.00247979	0.00247979	0.0431054	Kcnq4/Frs2/Tgfb2/Mycn/Kdm6a/Notch2/Aldh1a2/Rarb/Dvl2/Gli3	10
Upregulated	GO:0099072	regulation of postsynaptic membrane neurotransmitter receptor levels	6/295	133/28905	0.0451128	4.42029	4.01453	0.00249637	0.00249637	0.0431054	Ap2m1/Gphn/Atad1/Gsk3b/Dlg3/Arhgap44	6
Upregulated	GO:1902414	protein localization to cell junction	6/295	133/28905	0.0451128	4.42029	4.01453	0.00249637	0.00249637	0.0431054	Gphn/Map1a/Dlg5/Gsk3b/Arhgap44/Abhd17b	6
Upregulated	GO:0010970	transport along microtubule	7/295	179/28905	0.0391061	3.83174	3.85899	0.00251035	0.00251035	0.0431054	Map1a/Nde1/Agtpbp1/Htt/Terf2/Spg11/Bbs1	7
Upregulated	GO:0099111	microtubule-based transport	8/295	229/28905	0.0349345	3.42299	3.73801	0.00255199	0.00255199	0.0435369	Map1a/Nde1/Agtpbp1/Htt/Terf2/Stk36/Spg11/Bbs1	8
Upregulated	GO:0071897	DNA biosynthetic process	7/295	180/28905	0.0388889	3.81045	3.84073	0.00258966	0.00258966	0.0436488	Src/Gsk3b/Dnajc2/Tk2/Terf2/Acd/Naf1	7
Upregulated	GO:0060562	epithelial tube morphogenesis	11/295	395/28905	0.0278481	2.72864	3.51266	0.00263073	0.00263073	0.0440706	Adamts12/Dlg5/Src/Tgfb2/Hdac5/Mycn/Kdm6a/Notch2/Aldh1a2/Dvl2/Gli3	11
Upregulated	GO:0045727	positive regulation of translation	6/295	135/28905	0.0444444	4.3548	3.9673	0.00268927	0.00268927	0.0445495	Otud6b/Rps6kb1/Samd4/Mrps27/Elavl1/Eif4g3	6
Upregulated	GO:1902115	regulation of organelle assembly	8/295	231/28905	0.034632	3.39335	3.70851	0.00269174	0.00269174	0.0445495	Hspa1b/Src/Gsk3b/Wrap73/Htt/Fscn1/Scfd1/Mns1	8
Upregulated	GO:0043542	endothelial cell migration	8/295	232/28905	0.0344828	3.37873	3.69388	0.00276383	0.00276383	0.0454686	Spred1/Svbp/Hdac5/Ptprm/Atoh8/Lgals8/Adamts9/Rin2	8
Upregulated	GO:0008593	regulation of Notch signaling pathway	5/295	94/28905	0.0531915	5.21186	4.15327	0.00280378	0.00280378	0.0458101	Src/Tspan14/Tgfb2/Bmp2k/Rfng	5
Upregulated	GO:0007018	microtubule-based movement	12/295	458/28905	0.0262009	2.56724	3.43306	0.00281794	0.00281794	0.0458101	Map1a/Nde1/Tmf1/Agtpbp1/Dync1li1/Kif16b/Htt/Terf2/Stk36/Mns1/Spg11/Bbs1	12
Upregulated	GO:0051053	negative regulation of DNA metabolic process	6/295	138/28905	0.0434783	4.26013	3.89815	0.0029993	0.0029993	0.0479081	Src/Dnajc2/Flcn/Terf2/Acd/Terf2ip	6
Upregulated	GO:0048588	developmental cell growth	9/295	289/28905	0.0311419	3.05138	3.55894	0.00304422	0.00304422	0.0483445	Auts2/Yy1/Trpv2/Gsk3b/Gsk3a/Eif2b2/Ctdp1/Mex3c/Spg11	9
Upregulated	GO:2000060	positive regulation of ubiquitin-dependent protein catabolic process	5/295	96/28905	0.0520833	5.10328	4.08916	0.00307124	0.00307124	0.0484932	Hspa1b/Sumo3/Gsk3b/Gsk3a/Agtpbp1	5
Upregulated	GO:0061136	regulation of proteasomal protein catabolic process	7/295	187/28905	0.0374332	3.66781	3.71647	0.00320008	0.00320008	0.0496712	Map1a/N4bp1/Hspa1b/Smarcc1/Tmf1/Gsk3b/Gsk3a	7
Upregulated	GO:0032386	regulation of intracellular transport	9/295	293/28905	0.0307167	3.00972	3.51096	0.00333251	0.00333251	0.0514362	Src/Gsk3b/Camk1/Ctdspl2/Gcc2/Zpr1/Arhgap44/Scfd1/Gli3	9
Upregulated	GO:0007405	neuroblast proliferation	5/295	98/28905	0.0510204	4.99914	4.02681	0.00335662	0.00335662	0.0515188	Hapln1/Frs2/Nde1/Notch2/Gli3	5
Upregulated	GO:0007219	Notch signaling pathway	7/295	189/28905	0.037037	3.629	3.68206	0.00339316	0.00339316	0.0515508	Src/Maml3/Tspan14/Tgfb2/Notch2/Bmp2k/Rfng	7
Upregulated	GO:0007163	establishment or maintenance of cell polarity	8/295	240/28905	0.0333333	3.2661	3.57965	0.00339623	0.00339623	0.0515508	Dlg5/Pdzd11/Nde1/Gsk3b/Dlg3/Htt/Fscn1/Mark2	8
Upregulated	GO:0001667	ameboidal-type cell migration	12/295	470/28905	0.0255319	2.50169	3.333	0.00346665	0.00346665	0.0522836	Spred1/Src/Svbp/Tgfb2/Pfn2/Hdac5/Ptprm/Atoh8/Lgals8/Adamts9/Rin2/Sgpl1	12
Upregulated	GO:0051056	regulation of small GTPase mediated signal transduction	8/295	241/28905	0.033195	3.25255	3.56571	0.00348257	0.00348257	0.0522836	Rapgef1/Auts2/Src/Tgfb2/Arhgap17/Notch2/Flcn/Arhgap44	8
Upregulated	GO:2001251	negative regulation of chromosome organization	5/295	99/28905	0.0505051	4.94864	3.99627	0.00350624	0.00350624	0.0523529	Src/Dync1li1/Terf2/Acd/Terf2ip	5
Upregulated	GO:0097191	extrinsic apoptotic signaling pathway	8/295	243/28905	0.0329218	3.22578	3.53804	0.00366034	0.00366034	0.0537807	Rps6kb1/Src/Tgfb2/Gsk3b/Gsk3a/Htt/Bad/Zc3hc1	8
Upregulated	GO:0035418	protein localization to synapse	5/295	100/28905	0.05	4.89915	3.96613	0.00366059	0.00366059	0.0537807	Gphn/Map1a/Gsk3b/Arhgap44/Abhd17b	5
Upregulated	GO:0140747	regulation of ncRNA transcription	5/295	100/28905	0.05	4.89915	3.96613	0.00366059	0.00366059	0.0537807	Yy1/Tgfb2/Notch2/Atoh8/Bmyc	5
Upregulated	GO:0048660	regulation of smooth muscle cell proliferation	7/295	194/28905	0.0360825	3.53547	3.59804	0.00391474	0.00391474	0.0558419	Rps6kb1/Frs2/Src/Mef2d/Gsk3b/Mmp2/Timp3	7
Upregulated	GO:0009798	axis specification	5/295	102/28905	0.0490196	4.80309	3.90705	0.00398382	0.00398382	0.0558419	Tasor/Frs2/Kdm6a/Notch2/Mns1	5
Upregulated	GO:0043525	positive regulation of neuron apoptotic process	5/295	102/28905	0.0490196	4.80309	3.90705	0.00398382	0.00398382	0.0558419	Bace1/Tgfb2/Gsk3b/Gsk3a/Mmp2	5
Upregulated	GO:2001237	negative regulation of extrinsic apoptotic signaling pathway	5/295	102/28905	0.0490196	4.80309	3.90705	0.00398382	0.00398382	0.0558419	Rps6kb1/Src/Gsk3b/Htt/Zc3hc1	5
Upregulated	GO:1903320	regulation of protein modification by small protein conjugation or removal	8/295	247/28905	0.0323887	3.17354	3.48357	0.00403692	0.00403692	0.0561464	N4bp1/Svbp/Gps2/Gsk3b/Gsk3a/Amer1/Rassf5/Mycbp2	8
Upregulated	GO:0072001	renal system development	10/295	359/28905	0.0278552	2.72933	3.34799	0.00404641	0.00404641	0.0561464	Dlg5/Tgfb2/Hdac5/Notch2/Flcn/Aldh1a2/Amer1/Rarb/Gli3/Sgpl1	10
Upregulated	GO:0043393	regulation of protein binding	7/295	196/28905	0.0357143	3.49939	3.56521	0.00413959	0.00413959	0.0561915	Src/Gsk3b/Camk1/Hdac5/Tmem132a/Grem2/Rfng	7
Upregulated	GO:0035051	cardiocyte differentiation	7/295	197/28905	0.035533	3.48163	3.54895	0.00425561	0.00425561	0.056756	Frs2/Yy1/Tgfb2/Gsk3b/Gsk3a/Ctdp1/Rarb	7
Upregulated	GO:1900182	positive regulation of protein localization to nucleus	5/295	104/28905	0.0480769	4.71072	3.84948	0.00432695	0.00432695	0.0569216	Src/Tgfb2/Zpr1/Ipo7/Gli3	5
Upregulated	GO:0006417	regulation of translation	10/295	364/28905	0.0274725	2.69184	3.29843	0.0044545	0.0044545	0.0569216	Otud6b/Rps6kb1/Samd4/Ddx6/Mrps27/Elavl1/Eif4g3/Igf2bp3/Enc1/Abce1	10
Upregulated	GO:0040013	negative regulation of locomotion	10/295	364/28905	0.0274725	2.69184	3.29843	0.0044545	0.0044545	0.0569216	Dlg5/Spred1/Svbp/Gsk3b/Pfn2/Hdac5/Flcn/Ptprm/Thy1/Adamts9	10
Upregulated	GO:2001234	negative regulation of apoptotic signaling pathway	8/295	253/28905	0.0316206	3.09828	3.4039	0.00465702	0.00465702	0.0589611	Rps6kb1/Src/Gsk3b/Kdm6a/Htt/Creb3/Mapk8ip1/Zc3hc1	8
Upregulated	GO:0006720	isoprenoid metabolic process	5/295	106/28905	0.0471698	4.62184	3.79337	0.00469064	0.00469064	0.0591143	Dpm3/Aldh1a2/Rdh11/Srd5a3/Coq2	5
Upregulated	GO:0030900	forebrain development	11/295	427/28905	0.0257611	2.52415	3.22195	0.00471739	0.00471739	0.05918	Frs2/Nde1/Src/Gsk3b/Agtpbp1/Fbxo45/Aldh1a2/Htt/Rarb/Gli3/Bbs1	11
Upregulated	GO:0030705	cytoskeleton-dependent intracellular transport	7/295	202/28905	0.0346535	3.39545	3.46921	0.00487305	0.00487305	0.0605658	Map1a/Nde1/Agtpbp1/Htt/Terf2/Spg11/Bbs1	7
Upregulated	GO:0048659	smooth muscle cell proliferation	7/295	203/28905	0.0344828	3.37873	3.45356	0.00500422	0.00500422	0.0605658	Rps6kb1/Frs2/Src/Mef2d/Gsk3b/Mmp2/Timp3	7
Upregulated	GO:0043502	regulation of muscle adaptation	5/295	108/28905	0.0462963	4.53625	3.73863	0.00507555	0.00507555	0.0611597	Yy1/Gsk3b/Gsk3a/Pde9a/Ctdp1	5
Upregulated	GO:0034248	regulation of amide metabolic process	11/295	432/28905	0.025463	2.49494	3.17892	0.00513767	0.00513767	0.0616378	Otud6b/Rps6kb1/Samd4/Ddx6/Mrps27/Elavl1/Gsk3a/Eif4g3/Igf2bp3/Enc1/Abce1	11
Upregulated	GO:0045814	negative regulation of gene expression, epigenetic	6/295	155/28905	0.0387097	3.79289	3.54024	0.00528494	0.00528494	0.063129	Airn/Tasor/Atf7ip/Xist/Bmyc/Trip12	6
Upregulated	GO:0050905	neuromuscular process	7/295	206/28905	0.0339806	3.32952	3.4072	0.00541371	0.00541371	0.0632913	Bace1/Map1a/Itpr1/Agtpbp1/Vti1a/Camta1/Mycbp2	7
Upregulated	GO:0051099	positive regulation of binding	6/295	157/28905	0.0382166	3.74458	3.50148	0.00561973	0.00561973	0.0651454	Tgfb2/Gsk3b/Gtf2b/Tmem132a/Acd/Rfng	6
Upregulated	GO:0090316	positive regulation of intracellular protein transport	5/295	111/28905	0.045045	4.41365	3.65899	0.00569409	0.00569409	0.0657302	Gsk3b/Camk1/Ctdspl2/Zpr1/Gli3	5
Upregulated	GO:0007264	small GTPase-mediated signal transduction	11/295	439/28905	0.0250569	2.45516	3.11968	0.00577526	0.00577526	0.0663125	Rapgef1/Auts2/Src/Arhgef12/Tgfb2/Sh2d3c/Arhgap17/Notch2/Flcn/Hacd3/Arhgap44	11
Upregulated	GO:0055007	cardiac muscle cell differentiation	6/295	158/28905	0.0379747	3.72088	3.48235	0.00579282	0.00579282	0.0663125	Frs2/Yy1/Gsk3b/Gsk3a/Ctdp1/Rarb	6
Upregulated	GO:0007265	Ras protein signal transduction	5/295	112/28905	0.0446429	4.37424	3.63306	0.00591158	0.00591158	0.0668366	Rapgef1/Src/Tgfb2/Notch2/Flcn	5
Upregulated	GO:0016525	negative regulation of angiogenesis	5/295	112/28905	0.0446429	4.37424	3.63306	0.00591158	0.00591158	0.0668366	Spred1/Tgfb2/Flcn/Ptprm/Adamts9	5
Upregulated	GO:0070507	regulation of microtubule cytoskeleton organization	6/295	159/28905	0.0377358	3.69747	3.46336	0.00596976	0.00596976	0.0672178	Map1a/Hspa1b/Gas2l1/Gsk3b/Gsk3a/Mark2	6
Upregulated	GO:0048705	skeletal system morphogenesis	8/295	265/28905	0.0301887	2.95798	3.25144	0.00611425	0.00611425	0.0682849	Mef2d/Tgfb2/Mycn/Rflnb/Mmp2/Rarb/Gli3/Sgpl1	8
Upregulated	GO:0048593	camera-type eye morphogenesis	6/295	160/28905	0.0375	3.67436	3.44453	0.00615062	0.00615062	0.068413	Frs2/Yy1/Notch2/Ptprm/Thy1/Gli3	6
Upregulated	GO:0032886	regulation of microtubule-based process	8/295	266/28905	0.0300752	2.94686	3.23912	0.0062497	0.0062497	0.0692348	Map1a/Hspa1b/Gas2l1/Gsk3b/Gsk3a/Dync1li1/Mark2/Bbs1	8
Upregulated	GO:0006282	regulation of DNA repair	7/295	212/28905	0.0330189	3.23529	3.31699	0.00630748	0.00630748	0.0692668	Smarcc1/Yy1/Nsd2/Actr5/Tada3/Babam2/Terf2ip	7
Upregulated	GO:0070828	heterochromatin organization	6/295	161/28905	0.0372671	3.65154	3.42585	0.00633543	0.00633543	0.0692668	Airn/Tasor/Atf7ip/Xist/Bmyc/Trip12	6
Upregulated	GO:2000181	negative regulation of blood vessel morphogenesis	5/295	114/28905	0.0438596	4.2975	3.58212	0.00636398	0.00636398	0.0692668	Spred1/Tgfb2/Flcn/Ptprm/Adamts9	5
Upregulated	GO:1901343	negative regulation of vasculature development	5/295	115/28905	0.0434783	4.26013	3.55709	0.00659905	0.00659905	0.0710981	Spred1/Tgfb2/Flcn/Ptprm/Adamts9	5
Upregulated	GO:0031398	positive regulation of protein ubiquitination	5/295	116/28905	0.0431034	4.22341	3.53234	0.00684014	0.00684014	0.0720014	Gsk3b/Gsk3a/Amer1/Rassf5/Mycbp2	5
Upregulated	GO:0055017	cardiac muscle tissue growth	5/295	116/28905	0.0431034	4.22341	3.53234	0.00684014	0.00684014	0.0720014	Yy1/Tgfb2/Gsk3b/Gsk3a/Ctdp1	5
Upregulated	GO:0006260	DNA replication	8/295	271/28905	0.0295203	2.89249	3.1784	0.00696145	0.00696145	0.0727224	Mus81/Nfic/Yy1/Dnajc2/Tk2/Zpr1/Actr5/Ankrd17	8
Upregulated	GO:0048771	tissue remodeling	7/295	216/28905	0.0324074	3.17538	3.25863	0.00696157	0.00696157	0.0727224	Nfkb1/Src/Tgfb2/Lrrk1/Gsk3b/Notch2/Mmp2	7
Upregulated	GO:0071482	cellular response to light stimulus	5/295	117/28905	0.042735	4.18731	3.50786	0.00708732	0.00708732	0.0737556	N4bp1/Yy1/Mmp2/Actr5/Rdh11	5
Upregulated	GO:0001837	epithelial to mesenchymal transition	6/295	165/28905	0.0363636	3.56302	3.3526	0.00711522	0.00711522	0.0737665	Tasor/Dlg5/Spred1/Tgfb2/Gsk3b/Rflnb	6
Upregulated	GO:0031400	negative regulation of protein modification process	11/295	453/28905	0.0242826	2.37928	3.00453	0.00723672	0.00723672	0.0745606	Ensa/N4bp1/Spred1/Svbp/Lrrk1/Gps2/Gsk3b/Swap70/Flcn/Mgat5/Terf2ip	11
Upregulated	GO:0016032	viral process	9/295	332/28905	0.0271084	2.65617	3.08196	0.00741129	0.00741129	0.0745606	Tasor/Ddx6/N4bp1/Gtf2b/Ctdp1/Hacd3/Creb3/Bad/Eif2d	9
Upregulated	GO:0003300	cardiac muscle hypertrophy	5/295	119/28905	0.0420168	4.11693	3.45973	0.00760028	0.00760028	0.0748603	Yy1/Gsk3b/Gsk3a/Pde9a/Ctdp1	5
Upregulated	GO:0007178	transmembrane receptor protein serine/threonine kinase signaling pathway	10/295	394/28905	0.0253807	2.48688	3.01751	0.00762944	0.00762944	0.0748603	Spred1/Src/Pmepa1/Tgfb2/Dcp1a/Notch2/Flcn/Ctdspl2/Atoh8/Grem2	10
Upregulated	GO:0043161	proteasome-mediated ubiquitin-dependent protein catabolic process	10/295	394/28905	0.0253807	2.48688	3.01751	0.00762944	0.00762944	0.0748603	Map1a/N4bp1/Hspa1b/Klhdc2/Smarcc1/Gsk3b/Gsk3a/Fbxo45/Fbxw4/Trip12	10
Upregulated	GO:0031929	TOR signaling	6/295	168/28905	0.0357143	3.49939	3.29913	0.00774398	0.00774398	0.0757138	Rps6kb1/Src/Gsk3b/Gsk3a/Mfsd8/Flcn	6
Upregulated	GO:0034502	protein localization to chromosome	5/295	120/28905	0.0416667	4.08263	3.43605	0.0078662	0.0078662	0.0760997	Airn/Tasor/Terf2/Acd/Terf2ip	5
Upregulated	GO:2001236	regulation of extrinsic apoptotic signaling pathway	6/295	169/28905	0.035503	3.47869	3.28158	0.0079622	0.0079622	0.0767547	Rps6kb1/Src/Tgfb2/Gsk3b/Htt/Zc3hc1	6
Upregulated	GO:0021987	cerebral cortex development	5/295	121/28905	0.0413223	4.04889	3.41263	0.00813853	0.00813853	0.0781802	Nde1/Gsk3b/Fbxo45/Gli3/Bbs1	5
Upregulated	GO:0062207	regulation of pattern recognition receptor signaling pathway	6/295	171/28905	0.0350877	3.438	3.24687	0.00841184	0.00841184	0.0800869	Zdhhc18/Src/Gps2/Lrch4/Lrrc14/Ankrd17	6
Upregulated	GO:0033002	muscle cell proliferation	8/295	281/28905	0.0284698	2.78955	3.061	0.00856688	0.00856688	0.0809036	Rps6kb1/Frs2/Src/Mef2d/Tgfb2/Gsk3b/Mmp2/Timp3	8
Upregulated	GO:0014897	striated muscle hypertrophy	5/295	123/28905	0.0406504	3.98305	3.36654	0.00870267	0.00870267	0.0809036	Yy1/Gsk3b/Gsk3a/Pde9a/Ctdp1	5
Upregulated	GO:1990778	protein localization to cell periphery	10/295	402/28905	0.0248756	2.43739	2.94695	0.00871651	0.00871651	0.0809036	Ap2m1/Gphn/Rabep1/Pdzd11/Tspan14/Gsk3b/Rilpl2/Arhgap44/Tspan33/Bbs1	10
Upregulated	GO:0030856	regulation of epithelial cell differentiation	6/295	173/28905	0.0346821	3.39826	3.21267	0.00887943	0.00887943	0.0813823	Spred1/Tgfb2/Mycn/Atoh8/Ipo7/Bad	6
Upregulated	GO:0021537	telencephalon development	8/295	283/28905	0.0282686	2.76984	3.03814	0.00891869	0.00891869	0.0813823	Nde1/Gsk3b/Agtpbp1/Fbxo45/Htt/Rarb/Gli3/Bbs1	8
Upregulated	GO:0006888	endoplasmic reticulum to Golgi vesicle-mediated transport	5/295	124/28905	0.0403226	3.95093	3.34386	0.00899463	0.00899463	0.0813823	Sec31a/Cnih4/Htt/Vti1a/Scfd1	5
Upregulated	GO:0008033	tRNA processing	5/295	124/28905	0.0403226	3.95093	3.34386	0.00899463	0.00899463	0.0813823	Elp1/Trmt13/Clp1/Trmt1/Yrdc	5
Upregulated	GO:1903052	positive regulation of proteolysis involved in protein catabolic process	5/295	124/28905	0.0403226	3.95093	3.34386	0.00899463	0.00899463	0.0813823	Hspa1b/Sumo3/Gsk3b/Gsk3a/Agtpbp1	5
Upregulated	GO:0014896	muscle hypertrophy	5/295	125/28905	0.04	3.91932	3.32141	0.00929328	0.00929328	0.0834381	Yy1/Gsk3b/Gsk3a/Pde9a/Ctdp1	5
Upregulated	GO:0060419	heart growth	5/295	125/28905	0.04	3.91932	3.32141	0.00929328	0.00929328	0.0834381	Yy1/Tgfb2/Gsk3b/Gsk3a/Ctdp1	5
Upregulated	GO:0006413	translational initiation	5/295	126/28905	0.0396825	3.88822	3.2992	0.0095987	0.0095987	0.084669	Rps6kb1/Eif4g3/Eif2b2/Abce1/Eif2d	5
Upregulated	GO:0070646	protein modification by small protein removal	5/295	126/28905	0.0396825	3.88822	3.2992	0.0095987	0.0095987	0.084669	Otud6b/Cops7b/Otud7b/Usp42/Usp24	5
Upregulated	GO:2001235	positive regulation of apoptotic signaling pathway	6/295	176/28905	0.0340909	3.34033	3.16231	0.00961529	0.00961529	0.084669	Eef1e1/Tgfb2/Flcn/Mmp2/Bmyc/Bad	6
Upregulated	GO:0007281	germ cell development	11/295	474/28905	0.0232068	2.27387	2.83954	0.00995304	0.00995304	0.0862627	Airn/Rps6kb1/Src/Tmf1/Gsk3b/Gsk3a/Eif4g3/Xist/Mycn/Vps13b/Mns1	11
Downregulated	GO:0051345	positive regulation of hydrolase activity	16/209	488/28905	0.0327869	4.53447	6.72027	6.07543e-07	6.07543e-07	0.00144211	Hspd1/Ifi203/Ctsh/Zc3h15/Arl6ip5/Rgl1/Rps27l/Rapgef5/Rhog/Tbc1d2b/Snx9/Ndel1/Psme1/Bcap31/Rasgrp3/Aph1a	16
Downregulated	GO:0097193	intrinsic apoptotic signaling pathway	13/209	338/28905	0.0384615	5.31929	6.81678	1.24091e-06	1.24091e-06	0.00147276	Ddx5/Ifi203/Arl6ip5/Park7/Rps27l/Eno1/Siah1a/Hic1/Bcap31/Shisa5/Pdcd10/Snw1/Ube2k	13
Downregulated	GO:0060840	artery development	8/209	123/28905	0.0650407	8.99522	7.58339	3.30241e-06	3.30241e-06	0.00261296	Nrp1/Bmpr2/Snx17/Tbx2/Sec24b/Luzp1/Eng/Efemp2	8
Downregulated	GO:0051090	regulation of DNA-binding transcription factor activity	13/209	391/28905	0.0332481	4.59826	6.11354	6.0935e-06	6.0935e-06	0.00316902	Lrp6/Cflar/Ikbkb/Park7/Commd7/Crtc3/Mtdh/Hdac4/Rnf25/Otulin/Tut4/Nfkbia/Tax1bp1	13
Downregulated	GO:0022618	protein-RNA complex assembly	9/209	179/28905	0.0502793	6.9537	6.81895	6.67532e-06	6.67532e-06	0.00316902	Rps15/Sfswap/Lsm4/Sf3a2/Rps27l/Ago3/Prpf18/Gemin7/Eif3a	9
Downregulated	GO:0071826	protein-RNA complex organization	9/209	189/28905	0.047619	6.58578	6.57498	1.03458e-05	1.03458e-05	0.00409294	Rps15/Sfswap/Lsm4/Sf3a2/Rps27l/Ago3/Prpf18/Gemin7/Eif3a	9
Downregulated	GO:0002181	cytoplasmic translation	8/209	153/28905	0.0522876	7.23145	6.59541	1.64814e-05	1.64814e-05	0.00558882	Zc3h15/Rps15/Rps10/Eif4a1/Rpl36a/Rplp2/Eif3a/Rpl37a	8
Downregulated	GO:0072659	protein localization to plasma membrane	11/209	317/28905	0.0347003	4.7991	5.80444	2.1604e-05	2.1604e-05	0.0062718	Lrp6/Rab8a/Arl6ip5/Ikbkb/Atp2c1/Rhog/Palm/Fcho2/Kcnip3/Dennd4c/Stxbp1	11
Downregulated	GO:0051402	neuron apoptotic process	12/209	381/28905	0.0314961	4.35595	5.62748	2.378e-05	2.378e-05	0.0062718	Nrp1/Hspd1/Cflar/Hspa4/Park7/Mapk8/Pawr/Hdac4/Kcnip3/Siah1a/Cd2ap/Stxbp1	12
Downregulated	GO:0008380	RNA splicing	13/209	455/28905	0.0285714	3.95147	5.41557	3.00609e-05	3.00609e-05	0.00627807	Ddx5/Sfswap/Lsm4/Sf3a2/Hnrnpll/Arl6ip4/Prpf18/Gpkow/Zranb2/Gemin7/Polr2a/Snw1/Srrm2	13
Downregulated	GO:0048844	artery morphogenesis	6/209	84/28905	0.0714286	9.87867	6.95464	3.38122e-05	3.38122e-05	0.00627807	Nrp1/Bmpr2/Tbx2/Sec24b/Eng/Efemp2	6
Downregulated	GO:1903426	regulation of reactive oxygen species biosynthetic process	5/209	52/28905	0.0961538	13.2982	7.57512	3.71414e-05	3.71414e-05	0.00627807	Hspd1/Cflar/Park7/Hdac4/Cyba	5
Downregulated	GO:0048193	Golgi vesicle transport	10/209	281/28905	0.0355872	4.92176	5.63781	4.14779e-05	4.14779e-05	0.00627807	Rab8a/Atp2c1/Yipf6/Sec24b/Bcap31/Exoc4/Ap3d1/Snx2/Nrbp1/Bicd2	10
Downregulated	GO:0003151	outflow tract morphogenesis	6/209	88/28905	0.0681818	9.42964	6.75877	4.40121e-05	4.40121e-05	0.00627807	Lrp6/Nrp1/Bmpr2/Tbx2/Sec24b/Eng	6
Downregulated	GO:0003279	cardiac septum development	7/209	129/28905	0.0542636	7.50473	6.31903	4.43166e-05	4.43166e-05	0.00627807	Lrp6/Nrp1/Bmpr2/Snx17/Tbx2/Luzp1/Eng	7
Downregulated	GO:2001235	positive regulation of apoptotic signaling pathway	8/209	176/28905	0.0454545	6.28643	6.00344	4.49626e-05	4.49626e-05	0.00627807	Ctsh/Park7/Mapk8/Ltbr/Siah1a/Bcap31/Pea15a/Itm2c	8
Downregulated	GO:0030522	intracellular receptor signaling pathway	11/209	356/28905	0.0308989	4.27336	5.30352	6.18348e-05	6.18348e-05	0.00792095	Ddx5/Ifi203/Fkbp4/Park7/Mapk8/Trip4/Ipo5/Otulin/Nfkbia/Tax1bp1/Snw1	11
Downregulated	GO:0045862	positive regulation of proteolysis	11/209	357/28905	0.0308123	4.26139	5.29164	6.34027e-05	6.34027e-05	0.00792095	Hspd1/Ifi203/Ctsh/Arl6ip5/Mapk8/Rps27l/Eno1/Snx9/Psme1/Bcap31/Aph1a	11
Downregulated	GO:0010952	positive regulation of peptidase activity	8/209	188/28905	0.0425532	5.88517	5.73496	7.15377e-05	7.15377e-05	0.00849039	Hspd1/Ifi203/Ctsh/Arl6ip5/Rps27l/Psme1/Bcap31/Aph1a	8
Downregulated	GO:2001233	regulation of apoptotic signaling pathway	12/209	436/28905	0.0275229	3.80646	5.03915	8.68198e-05	8.68198e-05	0.00981347	Nrp1/Ctsh/Cflar/Park7/Mapk8/Ltbr/Eno1/Cttn/Siah1a/Bcap31/Pea15a/Itm2c	12
Downregulated	GO:0019646	aerobic electron transport chain	5/209	64/28905	0.078125	10.8048	6.70139	0.000101569	0.000101569	0.010842	Cox6a1/Park7/Sdha/Ndufv1/Cyc1	5
Downregulated	GO:1903409	reactive oxygen species biosynthetic process	5/209	66/28905	0.0757576	10.4774	6.57827	0.000117667	0.000117667	0.010842	Hspd1/Cflar/Park7/Hdac4/Cyba	5
Downregulated	GO:0072594	establishment of protein localization to organelle	12/209	452/28905	0.0265487	3.67172	4.88582	0.000121677	0.000121677	0.010842	Sec62/Hspd1/Ddx5/Hspa4/Sec61a2/Hgs/Cse1l/Ipo5/Bcap31/Ap3d1/Romo1/Nfkbia	12
Downregulated	GO:0043523	regulation of neuron apoptotic process	10/209	320/28905	0.03125	4.32192	5.0996	0.000121744	0.000121744	0.010842	Nrp1/Hspd1/Cflar/Park7/Mapk8/Pawr/Hdac4/Kcnip3/Cd2ap/Stxbp1	10
Downregulated	GO:0007517	muscle organ development	11/209	385/28905	0.0285714	3.95147	4.97548	0.000123521	0.000123521	0.010842	Lrp6/Ddx5/Cflar/Maff/Cfl2/Hdac4/Kmt5b/Nr1d2/Eng/Snw1/Efemp2	11
Downregulated	GO:0070918	regulatory ncRNA processing	5/209	67/28905	0.0746269	10.321	6.51867	0.000126415	0.000126415	0.010842	Ddx5/Tsn/Ago3/Tut4/Srrt	5
Downregulated	GO:0071806	protein transmembrane transport	5/209	69/28905	0.0724638	10.0218	6.40315	0.000145399	0.000145399	0.011901	Sec62/Hspd1/Sec61a2/Exoc4/Romo1	5
Downregulated	GO:1990778	protein localization to cell periphery	11/209	402/28905	0.0273632	3.78437	4.79773	0.00017976	0.00017976	0.0134078	Lrp6/Rab8a/Arl6ip5/Ikbkb/Atp2c1/Rhog/Palm/Fcho2/Kcnip3/Dennd4c/Stxbp1	11
Downregulated	GO:0052548	regulation of endopeptidase activity	10/209	336/28905	0.0297619	4.11611	4.90317	0.000180753	0.000180753	0.0134078	Hspd1/Ifi203/Cflar/Arl6ip5/Park7/Rps27l/Cst3/Psme1/Bcap31/Aph1a	10
Downregulated	GO:0010950	positive regulation of endopeptidase activity	7/209	164/28905	0.0426829	5.90311	5.37383	0.000199356	0.000199356	0.0139372	Hspd1/Ifi203/Arl6ip5/Rps27l/Psme1/Bcap31/Aph1a	7
Downregulated	GO:0035904	aorta development	5/209	74/28905	0.0675676	9.34469	6.13391	0.000202408	0.000202408	0.0139372	Snx17/Tbx2/Sec24b/Eng/Efemp2	5
Downregulated	GO:0072331	signal transduction by p53 class mediator	7/209	165/28905	0.0424242	5.86733	5.35095	0.00020693	0.00020693	0.0139372	Ddx5/Ifi203/Rps15/Rps27l/Hic1/Shisa5/Snw1	7
Downregulated	GO:2000116	regulation of cysteine-type endopeptidase activity	8/209	220/28905	0.0363636	5.02914	5.11962	0.000211375	0.000211375	0.0139372	Hspd1/Ifi203/Cflar/Arl6ip5/Park7/Rps27l/Cst3/Bcap31	8
Downregulated	GO:2001236	regulation of extrinsic apoptotic signaling pathway	7/209	169/28905	0.0414201	5.72846	5.26128	0.000239585	0.000239585	0.0149658	Nrp1/Cflar/Park7/Ltbr/Cttn/Pea15a/Itm2c	7
Downregulated	GO:0043547	positive regulation of GTPase activity	8/209	226/28905	0.0353982	4.89563	5.01754	0.000253558	0.000253558	0.0153779	Zc3h15/Rgl1/Rapgef5/Rhog/Tbc1d2b/Snx9/Ndel1/Rasgrp3	8
Downregulated	GO:0032088	negative regulation of NF-kappaB transcription factor activity	5/209	78/28905	0.0641026	8.86548	5.93628	0.000259139	0.000259139	0.0153779	Commd7/Otulin/Tut4/Nfkbia/Tax1bp1	5
Downregulated	GO:0002764	immune response-regulating signaling pathway	12/209	497/28905	0.0241449	3.33927	4.48931	0.000290488	0.000290488	0.0153851	Hspd1/Ifi203/Ctsh/Mapk8/Dgkz/Pawr/Cyba/Cd2ap/Ipo5/Otulin/Nfkbia/Tax1bp1	12
Downregulated	GO:0042775	mitochondrial ATP synthesis coupled electron transport	5/209	80/28905	0.0625	8.64384	5.8427	0.000291668	0.000291668	0.0153851	Cox6a1/Park7/Sdha/Ndufv1/Cyc1	5
Downregulated	GO:0006605	protein targeting	9/209	293/28905	0.0307167	4.24817	4.76913	0.000301269	0.000301269	0.015546	Sec62/Hspd1/Hspa4/Sec61a2/Hgs/Bcap31/Exoc4/Ap3d1/Romo1	9
Downregulated	GO:0042773	ATP synthesis coupled electron transport	5/209	82/28905	0.0609756	8.43301	5.75233	0.000327202	0.000327202	0.016525	Cox6a1/Park7/Sdha/Ndufv1/Cyc1	5
Downregulated	GO:0052547	regulation of peptidase activity	11/209	434/28905	0.0253456	3.50534	4.48798	0.000345362	0.000345362	0.0170787	Hspd1/Ifi203/Ctsh/Cflar/Arl6ip5/Park7/Rps27l/Cst3/Psme1/Bcap31/Aph1a	11
Downregulated	GO:0051091	positive regulation of DNA-binding transcription factor activity	8/209	238/28905	0.0336134	4.64879	4.82378	0.000358668	0.000358668	0.0173748	Lrp6/Cflar/Ikbkb/Park7/Crtc3/Mtdh/Hdac4/Rnf25	8
Downregulated	GO:0060411	cardiac septum morphogenesis	5/209	85/28905	0.0588235	8.13538	5.62239	0.00038653	0.00038653	0.0177064	Lrp6/Nrp1/Bmpr2/Tbx2/Eng	5
Downregulated	GO:0022613	ribonucleoprotein complex biogenesis	11/209	442/28905	0.0248869	3.44189	4.41508	0.000402593	0.000402593	0.0177064	Rps15/Sfswap/Lsm4/Pin4/Sf3a2/Rps27l/Ago3/Prpf18/Ddx52/Gemin7/Eif3a	11
Downregulated	GO:0061136	regulation of proteasomal protein catabolic process	7/209	187/28905	0.0374332	5.17706	4.89053	0.000441718	0.000441718	0.0185706	Park7/Mapk8/Psmd14/Psme1/Bcap31/Ube2k/Rhbdf1	7
Downregulated	GO:0000375	RNA splicing, via transesterification reactions	9/209	310/28905	0.0290323	4.0152	4.55506	0.000453764	0.000453764	0.0185706	Ddx5/Sfswap/Lsm4/Sf3a2/Prpf18/Gpkow/Gemin7/Snw1/Srrm2	9
Downregulated	GO:0000377	RNA splicing, via transesterification reactions with bulged adenosine as nucleophile	9/209	310/28905	0.0290323	4.0152	4.55506	0.000453764	0.000453764	0.0185706	Ddx5/Sfswap/Lsm4/Sf3a2/Prpf18/Gpkow/Gemin7/Snw1/Srrm2	9
Downregulated	GO:0000398	mRNA splicing, via spliceosome	9/209	310/28905	0.0290323	4.0152	4.55506	0.000453764	0.000453764	0.0185706	Ddx5/Sfswap/Lsm4/Sf3a2/Prpf18/Gpkow/Gemin7/Snw1/Srrm2	9
Downregulated	GO:0051650	establishment of vesicle localization	7/209	197/28905	0.035533	4.91426	4.70461	0.000602273	0.000602273	0.0238268	Mapk8/Hgs/Ndel1/Exoc4/Pdcd6ip/Ap3d1/Stxbp1	7
Downregulated	GO:0033209	tumor necrosis factor-mediated signaling pathway	5/209	94/28905	0.0531915	7.35646	5.26795	0.000613791	0.000613791	0.0238472	Ikbkb/Commd7/Otulin/Nfkbia/Ube2k	5
Downregulated	GO:0003205	cardiac chamber development	7/209	200/28905	0.035	4.84055	4.65127	0.000658533	0.000658533	0.0242971	Lrp6/Nrp1/Bmpr2/Snx17/Tbx2/Luzp1/Eng	7
Downregulated	GO:0072332	intrinsic apoptotic signaling pathway by p53 class mediator	5/209	96/28905	0.0520833	7.2032	5.19552	0.000675579	0.000675579	0.0242971	Ddx5/Ifi203/Rps27l/Shisa5/Snw1	5
Downregulated	GO:0006119	oxidative phosphorylation	6/209	148/28905	0.0405405	5.60681	4.79514	0.000747795	0.000747795	0.026267	Cox6a1/Park7/Sdha/Ndufb2/Ndufv1/Cyc1	6
Downregulated	GO:0002221	pattern recognition receptor signaling pathway	8/209	267/28905	0.0299625	4.14386	4.40443	0.000763548	0.000763548	0.026267	Hspd1/Ifi203/Mapk8/Cyba/Ipo5/Otulin/Nfkbia/Tax1bp1	8
Downregulated	GO:0002757	immune response-activating signaling pathway	11/209	486/28905	0.0226337	3.13028	4.04196	0.000879168	0.000879168	0.0285167	Hspd1/Ifi203/Mapk8/Dgkz/Pawr/Cyba/Cd2ap/Ipo5/Otulin/Nfkbia/Tax1bp1	11
Downregulated	GO:0006898	receptor-mediated endocytosis	8/209	273/28905	0.029304	4.05279	4.32508	0.00088137	0.00088137	0.0285167	Lrp6/Snx17/Fcho2/Hgs/Dgkd/Snx9/Cttn/Cd2ap	8
Downregulated	GO:2001237	negative regulation of extrinsic apoptotic signaling pathway	5/209	102/28905	0.0490196	6.77948	4.99013	0.000889014	0.000889014	0.0285167	Nrp1/Cflar/Park7/Cttn/Pea15a	5
Downregulated	GO:0043433	negative regulation of DNA-binding transcription factor activity	6/209	154/28905	0.038961	5.38837	4.65992	0.000919611	0.000919611	0.0290138	Commd7/Hdac4/Otulin/Tut4/Nfkbia/Tax1bp1	6
Downregulated	GO:0035914	skeletal muscle cell differentiation	5/209	103/28905	0.0485437	6.71366	4.95751	0.000928956	0.000928956	0.0290138	Ddx5/Maff/Hdac4/Nr1d2/Snw1	5
Downregulated	GO:0002758	innate immune response-activating signaling pathway	8/209	278/28905	0.028777	3.9799	4.26066	0.000990329	0.000990329	0.0305289	Hspd1/Ifi203/Mapk8/Cyba/Ipo5/Otulin/Nfkbia/Tax1bp1	8
Downregulated	GO:0022904	respiratory electron transport chain	5/209	105/28905	0.047619	6.58578	4.89355	0.00101282	0.00101282	0.0308221	Cox6a1/Park7/Sdha/Ndufv1/Cyc1	5
Downregulated	GO:0022411	cellular component disassembly	11/209	496/28905	0.0221774	3.06717	3.96306	0.00103594	0.00103594	0.0311264	Adamts15/Cfl2/Cst3/Rnf25/Cttn/Ndel1/Ufc1/Trip4/C1qb/Chka/Eng	11
Downregulated	GO:0033002	muscle cell proliferation	8/209	281/28905	0.0284698	3.93741	4.22273	0.00106071	0.00106071	0.0314725	Bmpr2/Cflar/Park7/Tbx2/Hdac4/Cyba/Dnmt1/Efemp2	8
Downregulated	GO:0007519	skeletal muscle tissue development	7/209	218/28905	0.0321101	4.44087	4.35207	0.00108949	0.00108949	0.0319271	Ddx5/Cflar/Maff/Cfl2/Hdac4/Nr1d2/Snw1	7
Downregulated	GO:0051648	vesicle localization	7/209	219/28905	0.0319635	4.42059	4.33641	0.00111869	0.00111869	0.0323832	Mapk8/Hgs/Ndel1/Exoc4/Pdcd6ip/Ap3d1/Stxbp1	7
Downregulated	GO:0002833	positive regulation of response to biotic stimulus	10/209	431/28905	0.0232019	3.20885	3.94296	0.00124601	0.00124601	0.0356341	Hspd1/Ifi203/Sash1/Mapk8/Cyba/Ipo5/Otulin/Nfkbia/Tax1bp1/Ube2k	10
Downregulated	GO:1903050	regulation of proteolysis involved in protein catabolic process	7/209	224/28905	0.03125	4.32192	4.25949	0.00127407	0.00127407	0.0360029	Park7/Mapk8/Psmd14/Psme1/Bcap31/Ube2k/Rhbdf1	7
Downregulated	GO:0051098	regulation of binding	9/209	361/28905	0.0249307	3.44796	3.99431	0.0013274	0.0013274	0.0366375	Ifi203/Park7/Mapk8/Eno1/Hdac4/Cd2ap/Ebf2/Tle5/Edf1	9
Downregulated	GO:0042176	regulation of protein catabolic process	9/209	363/28905	0.0247934	3.42896	3.97441	0.00137879	0.00137879	0.0376186	Park7/Mapk8/Cst3/Snx9/Psmd14/Psme1/Bcap31/Ube2k/Rhbdf1	9
Downregulated	GO:0007264	small GTPase-mediated signal transduction	10/209	439/28905	0.022779	3.15037	3.87458	0.001428	0.001428	0.0385185	Nrp1/Rgl1/Dgkz/Rapgef5/Stard8/Rhog/Nisch/Dennd4c/Cd2ap/Rasgrp3	10
Downregulated	GO:0060538	skeletal muscle organ development	7/209	230/28905	0.0304348	4.20917	4.1701	0.00148229	0.00148229	0.0390974	Ddx5/Cflar/Maff/Cfl2/Hdac4/Nr1d2/Snw1	7
Downregulated	GO:2000377	regulation of reactive oxygen species metabolic process	6/209	169/28905	0.035503	4.91011	4.35071	0.00148241	0.00148241	0.0390974	Hspd1/Cflar/Park7/Hdac4/Cyba/Romo1	6
Downregulated	GO:0022900	electron transport chain	5/209	117/28905	0.042735	5.91032	4.54191	0.00163917	0.00163917	0.0422922	Cox6a1/Park7/Sdha/Ndufv1/Cyc1	5
Downregulated	GO:0002218	activation of innate immune response	8/209	303/28905	0.0264026	3.65152	3.95968	0.00170785	0.00170785	0.0428389	Hspd1/Ifi203/Mapk8/Cyba/Ipo5/Otulin/Nfkbia/Tax1bp1	8
Downregulated	GO:0034599	cellular response to oxidative stress	7/209	238/28905	0.0294118	4.06769	4.05555	0.00180018	0.00180018	0.0440521	Arl6ip5/Park7/Mapk8/Cst3/Pawr/Pdcd10/Romo1	7
Downregulated	GO:0043087	regulation of GTPase activity	8/209	309/28905	0.02589	3.58062	3.89217	0.00192977	0.00192977	0.0462693	Zc3h15/Rgl1/Rapgef5/Rhog/Tbc1d2b/Snx9/Ndel1/Rasgrp3	8
Downregulated	GO:0045765	regulation of angiogenesis	8/209	310/28905	0.0258065	3.56907	3.88108	0.00196887	0.00196887	0.0465934	Tbxa2r/Nrp1/Ctsh/Sash1/Mtdh/Hgs/Pdcd10/Eng	8
Downregulated	GO:0002753	cytoplasmic pattern recognition receptor signaling pathway	6/209	179/28905	0.0335196	4.6358	4.16419	0.00198255	0.00198255	0.0465934	Ifi203/Mapk8/Ipo5/Otulin/Nfkbia/Tax1bp1	6
Downregulated	GO:0097191	extrinsic apoptotic signaling pathway	7/209	243/28905	0.0288066	3.98399	3.98647	0.00202421	0.00202421	0.0471063	Nrp1/Cflar/Park7/Ltbr/Cttn/Pea15a/Itm2c	7
Downregulated	GO:0062197	cellular response to chemical stress	8/209	313/28905	0.0255591	3.53486	3.84809	0.00208993	0.00208993	0.0477003	Arl6ip5/Park7/Mapk8/Cst3/Pawr/Lrrc8d/Pdcd10/Romo1	8
Downregulated	GO:0060485	mesenchyme development	8/209	314/28905	0.0254777	3.5236	3.83718	0.00213156	0.00213156	0.0480828	Lrp6/Nrp1/Ddx5/Bmpr2/Tbx2/Pawr/Exoc4/Eng	8
Downregulated	GO:0045766	positive regulation of angiogenesis	6/209	182/28905	0.032967	4.55939	4.11091	0.00215491	0.00215491	0.0480828	Tbxa2r/Nrp1/Ctsh/Sash1/Mtdh/Eng	6
Downregulated	GO:0006979	response to oxidative stress	9/209	388/28905	0.0231959	3.20802	3.73688	0.00216746	0.00216746	0.0480828	Arl6ip5/Park7/Mapk8/Cst3/Pawr/Cd2ap/Pdcd10/Romo1/Atox1	9
Downregulated	GO:1901342	regulation of vasculature development	8/209	317/28905	0.0252366	3.49026	3.80473	0.00226037	0.00226037	0.0492239	Tbxa2r/Nrp1/Ctsh/Sash1/Mtdh/Hgs/Pdcd10/Eng	8
Downregulated	GO:1902905	positive regulation of supramolecular fiber organization	6/209	185/28905	0.0324324	4.48545	4.05877	0.00233836	0.00233836	0.0500047	Nrp1/Mapk8/Cfl2/Snx9/Cttn/Efemp2	6
Downregulated	GO:1904018	positive regulation of vasculature development	6/209	185/28905	0.0324324	4.48545	4.05877	0.00233836	0.00233836	0.0500047	Tbxa2r/Nrp1/Ctsh/Sash1/Mtdh/Eng	6
Downregulated	GO:0043281	regulation of cysteine-type endopeptidase activity involved in apoptotic process	6/209	187/28905	0.0320856	4.43748	4.02462	0.00246703	0.00246703	0.0518225	Hspd1/Cflar/Arl6ip5/Park7/Rps27l/Bcap31	6
Downregulated	GO:0030198	extracellular matrix organization	8/209	327/28905	0.0244648	3.38352	3.69929	0.00273447	0.00273447	0.0551466	Cflar/Olfml2a/Adamts15/Mmp11/Cst3/Col23a1/Eng/Efemp2	8
Downregulated	GO:0045229	external encapsulating structure organization	8/209	328/28905	0.0243902	3.37321	3.68897	0.00278584	0.00278584	0.055569	Cflar/Olfml2a/Adamts15/Mmp11/Cst3/Col23a1/Eng/Efemp2	8
Downregulated	GO:0045089	positive regulation of innate immune response	9/209	404/28905	0.0222772	3.08097	3.59475	0.00283721	0.00283721	0.0556732	Hspd1/Ifi203/Mapk8/Cyba/Ipo5/Otulin/Nfkbia/Tax1bp1/Ube2k	9
Downregulated	GO:0043062	extracellular structure organization	8/209	329/28905	0.0243161	3.36295	3.67869	0.00283797	0.00283797	0.0556732	Cflar/Olfml2a/Adamts15/Mmp11/Cst3/Col23a1/Eng/Efemp2	8
Downregulated	GO:0048660	regulation of smooth muscle cell proliferation	6/209	194/28905	0.0309278	4.27736	3.90879	0.00295962	0.00295962	0.0571154	Bmpr2/Park7/Hdac4/Cyba/Dnmt1/Efemp2	6
Downregulated	GO:0009060	aerobic respiration	6/209	199/28905	0.0301508	4.16989	3.82936	0.00335405	0.00335405	0.0621989	Cox6a1/Park7/Sdha/Ndufb2/Ndufv1/Cyc1	6
Downregulated	GO:0090150	establishment of protein localization to membrane	7/209	268/28905	0.0261194	3.61235	3.66671	0.00348564	0.00348564	0.0638693	Sec62/Rab8a/Hspa4/Sec61a2/Atp2c1/Exoc4/Romo1	7
Downregulated	GO:0051656	establishment of organelle localization	10/209	498/28905	0.0200803	2.77714	3.41401	0.00354338	0.00354338	0.0638693	Rps15/Mapk8/Hgs/Ndel1/Exoc4/Pdcd6ip/Ap3d1/Pdcd10/Stxbp1/Bicd2	10
Downregulated	GO:0048659	smooth muscle cell proliferation	6/209	203/28905	0.0295567	4.08773	3.76767	0.00369678	0.00369678	0.0659774	Bmpr2/Park7/Hdac4/Cyba/Dnmt1/Efemp2	6
Downregulated	GO:0034614	cellular response to reactive oxygen species	5/209	143/28905	0.034965	4.83571	3.92416	0.00390795	0.00390795	0.0682454	Park7/Mapk8/Pawr/Pdcd10/Romo1	5
Downregulated	GO:2001056	positive regulation of cysteine-type endopeptidase activity	5/209	144/28905	0.0347222	4.80213	3.90344	0.00402522	0.00402522	0.0687382	Hspd1/Ifi203/Arl6ip5/Rps27l/Bcap31	5
Downregulated	GO:0051258	protein polymerization	7/209	287/28905	0.0243902	3.37321	3.44825	0.00505052	0.00505052	0.0791485	Fkbp4/Mapk8/Snx9/Cttn/Ndel1/Cd2ap/Ube2k	7
Downregulated	GO:0003206	cardiac chamber morphogenesis	5/209	152/28905	0.0328947	4.54939	3.74434	0.00505563	0.00505563	0.0791485	Lrp6/Nrp1/Bmpr2/Tbx2/Eng	5
Downregulated	GO:0060491	regulation of cell projection assembly	6/209	217/28905	0.0276498	3.824	3.56358	0.00510324	0.00510324	0.0791485	Nrp1/Rhog/Hdac4/Palm/Cttn/Ndel1	6
Downregulated	GO:0060560	developmental growth involved in morphogenesis	7/209	290/28905	0.0241379	3.33831	3.41543	0.00533927	0.00533927	0.0807592	Lrp6/Nrp1/Bmpr2/Tbx2/Cttn/Ndel1/Cd2ap	7
Downregulated	GO:0098876	vesicle-mediated transport to the plasma membrane	5/209	156/28905	0.0320513	4.43274	3.66888	0.00563532	0.00563532	0.0822458	Rab8a/Snx17/Atp2c1/Hgs/Exoc4	5
Downregulated	GO:0032386	regulation of intracellular transport	7/209	293/28905	0.0238908	3.30413	3.38305	0.00564024	0.00564024	0.0822458	Park7/Mapk8/Sec24b/Ndel1/Ipo5/Bcap31/Pdcd10	7
Downregulated	GO:0031346	positive regulation of cell projection organization	9/209	467/28905	0.0192719	2.66534	3.09637	0.0071982	0.0071982	0.0933098	Lrp6/Nrp1/Bmpr2/Cflar/Ikbkb/Sf3a2/Hdac4/Palm/Ndel1	9
Downregulated	GO:0006937	regulation of muscle contraction	5/209	167/28905	0.0299401	4.14076	3.47381	0.00746892	0.00746892	0.0933098	Tbxa2r/Eno1/Pawr/Hdac4/Cttn	5
Downregulated	GO:0051147	regulation of muscle cell differentiation	5/209	167/28905	0.0299401	4.14076	3.47381	0.00746892	0.00746892	0.0933098	Bmpr2/Hdac4/Dnmt1/Eng/Efemp2	5
Downregulated	GO:1903008	organelle disassembly	5/209	167/28905	0.0299401	4.14076	3.47381	0.00746892	0.00746892	0.0933098	Rnf25/Cttn/Ufc1/Trip4/Chka	5
Downregulated	GO:0019221	cytokine-mediated signaling pathway	9/209	471/28905	0.0191083	2.6427	3.06755	0.00759009	0.00759009	0.0943271	Zc3h15/Osmr/Ikbkb/Commd7/Hdac4/Otulin/Tut4/Nfkbia/Ube2k	9
Downregulated	GO:0042692	muscle cell differentiation	9/209	476/28905	0.0189076	2.61494	3.03195	0.00810265	0.00810265	0.0978753	Bmpr2/Cflar/Adamts15/Tbx2/Cfl2/Hdac4/Dnmt1/Eng/Efemp2	9
Downregulated	GO:0060562	epithelial tube morphogenesis	8/209	395/28905	0.0202532	2.80104	3.07585	0.0083328	0.0083328	0.0988972	Lrp6/Nrp1/Ctsh/Tbx2/Sec24b/Gatad2a/Luzp1/Eng	8
Downregulated	GO:0009755	hormone-mediated signaling pathway	5/209	172/28905	0.0290698	4.02039	3.39061	0.0084258	0.0084258	0.0995034	Ddx5/Fkbp4/Park7/Trip4/Nr1d2	5
Downregulated	GO:0045088	regulation of innate immune response	9/209	486/28905	0.0185185	2.56114	2.96208	0.00920653	0.00920653	0.102297	Hspd1/Ifi203/Mapk8/Cyba/Ipo5/Otulin/Nfkbia/Tax1bp1/Ube2k	9
Downregulated	GO:0006091	generation of precursor metabolites and energy	9/209	488/28905	0.0184426	2.55064	2.94831	0.00944034	0.00944034	0.103528	Cox6a1/Pgd/Park7/Sdha/Ndufb2/Eno1/Ndufv1/Hdac4/Cyc1	9
Downregulated	GO:0033157	regulation of intracellular protein transport	5/209	177/28905	0.0282486	3.90682	3.3105	0.00946446	0.00946446	0.103528	Park7/Ndel1/Ipo5/Bcap31/Pdcd10	5
Downregulated	GO:0010632	regulation of epithelial cell migration	6/209	250/28905	0.024	3.31923	3.14308	0.00991936	0.00991936	0.10654	Tbxa2r/Nrp1/Bmpr2/Ctsh/Sash1/Pdcd10	6

## Sheet: GO terms pericytes (condensed)
Table S3: Non-redundant GO Biological Process terms enriched in differentially expressed genes in P6 Gpr124 fl/fl vs Gpr124 ΔEC/ΔEC hyaloid pericytes. Upregulated and downregulated genes (Gpr124 fl/fl vs Gpr124 ΔEC/ΔEC) were analyzed separately. Inclusion criteria for GO terms: Overlapping genes ≥ 5 and p < 0.01. Redundant and semantically similar terms were consolidated into representative terms…
Input gene set	ID	Description	GeneRatio	BgRatio	RichFactor	FoldEnrichment	zScore	pvalue	p.adjust	qvalue	geneID	Count
Upregulated	GO:0034504	protein localization to nucleus	14/295	337/28905	0.041543	4.07051	5.75727	1.09755e-05	1.09755e-05	0.00501961	Otud7b/Src/Sumo3/Elavl1/Tgfb2/Gsk3b/Nol8/Flcn/Htt/Rassf5/Zpr1/Ipo7/Gli3/Spg11	14
Upregulated	GO:0022411	cellular component disassembly	17/295	496/28905	0.0342742	3.35829	5.37949	1.58911e-05	1.58911e-05	0.00501961	Mrpl58/Map1a/Smarcc1/Gas2l1/Tgfb2/Gsk3b/Gsk3a/Swap70/Mfsd8/Snx14/Htt/Fscn1/Bmyc/Abce1/Atg4d/Eif2d/Cisd2	17
Upregulated	GO:0042176	regulation of protein catabolic process	14/295	363/28905	0.0385675	3.77896	5.41034	2.50358e-05	2.50358e-05	0.00529877	Tmem9/Map1a/N4bp1/Hspa1b/Smarcc1/Tmf1/Gsk3b/Gsk3a/Mfsd8/Amer1/Tmem132a/Egln2/Timp3/Mycbp2	14
Upregulated	GO:0061448	connective tissue development	13/295	318/28905	0.0408805	4.0056	5.47257	2.67246e-05	2.67246e-05	0.00529877	Adamts12/Mef2d/Tgfb2/Mycn/Rflnb/Amer1/Slc25a25/Vps13b/Rarb/Mex3c/Fbxw4/Gli3/Bbs1	13
Upregulated	GO:2001233	regulation of apoptotic signaling pathway	15/295	436/28905	0.0344037	3.37098	5.06542	4.80506e-05	4.80506e-05	0.00776546	Rps6kb1/Eef1e1/Src/Tgfb2/Gsk3b/Kdm6a/Flcn/Ptpmt1/Htt/Mmp2/Bmyc/Creb3/Bad/Mapk8ip1/Zc3hc1	15
Upregulated	GO:0016236	macroautophagy	10/295	275/28905	0.0363636	3.56302	4.33649	0.000568438	0.000568438	0.0229017	Nbr1/Gsk3a/Mfsd8/Snx14/Htt/Lgals8/Vti1a/Atg4d/Scfd1/Spg11	10
Upregulated	GO:0051098	regulation of binding	11/295	361/28905	0.0304709	2.98563	3.85502	0.00130449	0.00130449	0.0317159	Src/Sumo3/Tgfb2/Gsk3b/Camk1/Hdac5/Gtf2b/Tmem132a/Grem2/Acd/Rfng	11
Upregulated	GO:0007389	pattern specification process	13/295	491/28905	0.0264766	2.59426	3.61796	0.0017432	0.0017432	0.0349183	Tasor/Frs2/Yy1/Kdm6a/Notch2/Aldh1a2/Htt/Grem2/Dvl2/Acd/Rfng/Mns1/Gli3	13
Upregulated	GO:0001667	ameboidal-type cell migration	12/295	470/28905	0.0255319	2.50169	3.333	0.00346665	0.00346665	0.0522836	Spred1/Src/Svbp/Tgfb2/Pfn2/Hdac5/Ptprm/Atoh8/Lgals8/Adamts9/Rin2/Sgpl1	12
Upregulated	GO:0140747	regulation of ncRNA transcription	5/295	100/28905	0.05	4.89915	3.96613	0.00366059	0.00366059	0.0537807	Yy1/Tgfb2/Notch2/Atoh8/Bmyc	5
Upregulated	GO:0071482	cellular response to light stimulus	5/295	117/28905	0.042735	4.18731	3.50786	0.00708732	0.00708732	0.0737556	N4bp1/Yy1/Mmp2/Actr5/Rdh11	5
Upregulated	GO:0016032	viral process	9/295	332/28905	0.0271084	2.65617	3.08196	0.00741129	0.00741129	0.0745606	Tasor/Ddx6/N4bp1/Gtf2b/Ctdp1/Hacd3/Creb3/Bad/Eif2d	9
Downregulated	GO:0051345	positive regulation of hydrolase activity	16/209	488/28905	0.0327869	4.53447	6.72027	6.07543e-07	6.07543e-07	0.00144211	Hspd1/Ifi203/Ctsh/Zc3h15/Arl6ip5/Rgl1/Rps27l/Rapgef5/Rhog/Tbc1d2b/Snx9/Ndel1/Psme1/Bcap31/Rasgrp3/Aph1a	16
Downregulated	GO:0097193	intrinsic apoptotic signaling pathway	13/209	338/28905	0.0384615	5.31929	6.81678	1.24091e-06	1.24091e-06	0.00147276	Ddx5/Ifi203/Arl6ip5/Park7/Rps27l/Eno1/Siah1a/Hic1/Bcap31/Shisa5/Pdcd10/Snw1/Ube2k	13
Downregulated	GO:0008380	RNA splicing	13/209	455/28905	0.0285714	3.95147	5.41557	3.00609e-05	3.00609e-05	0.00627807	Ddx5/Sfswap/Lsm4/Sf3a2/Hnrnpll/Arl6ip4/Prpf18/Gpkow/Zranb2/Gemin7/Polr2a/Snw1/Srrm2	13
Downregulated	GO:0072594	establishment of protein localization to organelle	12/209	452/28905	0.0265487	3.67172	4.88582	0.000121677	0.000121677	0.010842	Sec62/Hspd1/Ddx5/Hspa4/Sec61a2/Hgs/Cse1l/Ipo5/Bcap31/Ap3d1/Romo1/Nfkbia	12
Downregulated	GO:0007517	muscle organ development	11/209	385/28905	0.0285714	3.95147	4.97548	0.000123521	0.000123521	0.010842	Lrp6/Ddx5/Cflar/Maff/Cfl2/Hdac4/Kmt5b/Nr1d2/Eng/Snw1/Efemp2	11
Downregulated	GO:0022613	ribonucleoprotein complex biogenesis	11/209	442/28905	0.0248869	3.44189	4.41508	0.000402593	0.000402593	0.0177064	Rps15/Sfswap/Lsm4/Pin4/Sf3a2/Rps27l/Ago3/Prpf18/Ddx52/Gemin7/Eif3a	11
Downregulated	GO:0022411	cellular component disassembly	11/209	496/28905	0.0221774	3.06717	3.96306	0.00103594	0.00103594	0.0311264	Adamts15/Cfl2/Cst3/Rnf25/Cttn/Ndel1/Ufc1/Trip4/C1qb/Chka/Eng	11
Downregulated	GO:0006937	regulation of muscle contraction	5/209	167/28905	0.0299401	4.14076	3.47381	0.00746892	0.00746892	0.0933098	Tbxa2r/Eno1/Pawr/Hdac4/Cttn	5
